# Supplementary material for: Microbiome of Citrullus colocynthis (L.) Schrad. Reveals a Potential Association with Non-Photosynthetic Cyanobacteria
Source: Microorganisms. 2022 Oct 21;10(10):2083. doi: 10.3390/microorganisms10102083 (PMC9607294; doi:10.3390/microorganisms10102083)
Supplement: Supplementary file 1 [file microorganisms-10-02083-s001.zip › Supplementary_TableS1_OTUs_generated_from_root_soil_leaf_samples..xlsx]

## Sheet: OTU table leaf & surface
	Leaf1	Leaf2	Leaf3	LeafS1	LeafS2	LeafS3	Kingdom	Phylum	Class	Order	Family	Genus	Species
seq1	114172	103906	102058	79912	80878	89994	k__Bacteria	p__Cyanobacteria	c__Chloroplast	o__Streptophyta	f__	g__	s__
seq2	14623	18894	11468	10309	11250	15484	k__Bacteria	p__Proteobacteria	c__Alphaproteobacteria	o__Rickettsiales	f__mitochondria	g__Citrullus	s__lanatus
seq3	507	0	0	32279	300	348	k__Bacteria	p__Proteobacteria	c__Gammaproteobacteria	o__Pseudomonadales	f__Moraxellaceae	g__Acinetobacter	s__
seq4	401	277	486	1702	1580	1787	k__Bacteria	p__Cyanobacteria	c__Chloroplast	o__Streptophyta	f__	g__	s__
seq5	419	450	179	516	863	351	k__Bacteria	p__Cyanobacteria	c__Chloroplast	o__Streptophyta	f__	g__	s__
seq6	345	429	166	373	788	302	k__Bacteria	p__Cyanobacteria	c__Chloroplast	o__Streptophyta	f__	g__	s__
seq7	560	0	239	176	297	190	k__Bacteria	p__Proteobacteria	c__Alphaproteobacteria	o__Rickettsiales	f__mitochondria
seq8	0	0	61	39	1263	56	k__Bacteria	p__Proteobacteria	c__Alphaproteobacteria	o__Rhodospirillales	f__Acetobacteraceae
seq9	186	206	104	209	509	139	k__Bacteria	p__Cyanobacteria	c__Chloroplast	o__Streptophyta	f__	g__	s__
seq10	0	0	277	0	209	842	k__Bacteria	p__Proteobacteria	c__Gammaproteobacteria	o__Oceanospirillales	f__Oceanospirillaceae	g__	s__
seq11	152	189	76	243	452	154	k__Bacteria	p__Cyanobacteria	c__Chloroplast	o__Streptophyta	f__	g__	s__
seq12	107	128	70	239	471	171	k__Bacteria	p__Cyanobacteria	c__Chloroplast	o__Streptophyta	f__	g__	s__
seq13	32	0	27	273	372	338	k__Bacteria	p__Actinobacteria	c__Actinobacteria	o__Actinomycetales	f__Corynebacteriaceae	g__Corynebacterium	s__
seq14	0	0	20	56	399	550	k__Bacteria	p__Firmicutes	c__Bacilli	o__Lactobacillales	f__Enterococcaceae	g__Enterococcus	s__
seq15	0	0	279	0	292	453	k__Bacteria	p__Actinobacteria	c__Actinobacteria	o__Actinomycetales	f__Microbacteriaceae
seq16	0	0	0	287	328	394	k__Bacteria	p__Firmicutes	c__Bacilli	o__Bacillales	f__Bacillaceae	g__Bacillus	s__foraminis
seq17	0	0	376	0	318	191	k__Bacteria	p__Proteobacteria	c__Alphaproteobacteria	o__Rhodobacterales	f__Rhodobacteraceae	g__Anaerospora	s__
seq18	87	36	94	174	276	215	k__Bacteria	p__Firmicutes	c__Clostridia	o__Clostridiales	f__Clostridiaceae	g__SMB53	s__
seq19	0	0	352	0	286	238	k__Bacteria	p__Proteobacteria	c__Gammaproteobacteria	o__Oceanospirillales	f__	g__	s__
seq20	25	0	0	269	297	264	k__Bacteria	p__Firmicutes	c__Bacilli	o__Bacillales
seq21	146	113	148	144	185	118	k__Bacteria	p__Firmicutes	c__Bacilli	o__Bacillales
seq22	193	271	303	0	0	0	k__Bacteria	p__Proteobacteria	c__Betaproteobacteria	o__Rhodocyclales	f__Rhodocyclaceae	g__Dechloromonas	s__
seq23	0	0	380	0	357	0	k__Bacteria	p__Proteobacteria	c__Betaproteobacteria	o__Burkholderiales	f__Comamonadaceae	g__Comamonas	s__
seq24	83	96	88	132	119	203	k__Bacteria	p__Actinobacteria	c__Actinobacteria	o__Actinomycetales	f__Pseudonocardiaceae	g__Saccharopolyspora	s__
seq25	0	719	0	0	0	0	k__Bacteria	p__Proteobacteria	c__Alphaproteobacteria	o__Rickettsiales	f__mitochondria
seq26	70	49	66	167	160	195	k__Bacteria	p__Proteobacteria	c__Alphaproteobacteria	o__Rickettsiales	f__mitochondria
seq27	115	99	141	78	141	125	k__Bacteria	p__Actinobacteria	c__Actinobacteria	o__Actinomycetales	f__Micrococcaceae	g__	s__
seq28	21	0	0	195	258	225	k__Bacteria	p__Firmicutes	c__Bacilli	o__Bacillales	f__Staphylococcaceae	g__Salinicoccus	s__
seq29	16	0	65	87	466	61	k__Bacteria	p__Firmicutes	c__Bacilli	o__Bacillales	f__Alicyclobacillaceae	g__Alicyclobacillus	s__
seq30	81	59	68	138	142	181	k__Bacteria	p__Firmicutes	c__Bacilli	o__Bacillales	f__Bacillaceae	g__Bacillus
seq31	0	0	17	157	204	268	k__Bacteria	p__Proteobacteria	c__Gammaproteobacteria	o__Pseudomonadales	f__Pseudomonadaceae	g__Pseudomonas	s__
seq32	30	0	29	134	274	172	k__Bacteria	p__Firmicutes	c__Bacilli	o__Turicibacterales	f__Turicibacteraceae	g__Turicibacter	s__
seq33	9	0	0	185	169	256	k__Bacteria	p__Firmicutes	c__Bacilli	o__Bacillales	f__Bacillaceae	g__Bacillus	s__humi
seq34	0	6	376	0	221	0	k__Bacteria	p__Proteobacteria	c__Epsilonproteobacteria	o__Campylobacterales	f__Campylobacteraceae	g__Arcobacter
seq35	12	20	23	141	202	193	k__Bacteria	p__Proteobacteria	c__Alphaproteobacteria	o__Rhizobiales	f__Bradyrhizobiaceae	g__	s__
seq36	26	0	29	189	173	167	k__Bacteria	p__Actinobacteria	c__Actinobacteria	o__Actinomycetales	f__Geodermatophilaceae	g__Geodermatophilus	s__obscurus
seq37	45	55	55	78	123	219	k__Bacteria	p__Firmicutes	c__Bacilli	o__Bacillales
seq38	0	0	38	133	235	159	k__Bacteria	p__Proteobacteria	c__Alphaproteobacteria	o__Rhizobiales	f__Bradyrhizobiaceae	g__Balneimonas	s__
seq39	0	0	0	186	196	181	k__Bacteria	p__Firmicutes	c__Bacilli	o__Bacillales	f__Planococcaceae
seq40	78	142	100	80	112	45	k__Bacteria	p__Proteobacteria	c__Alphaproteobacteria	o__Rhizobiales	f__Bradyrhizobiaceae	g__Bradyrhizobium	s__
seq41	0	550	0	0	0	5	k__Bacteria	p__Proteobacteria	c__Alphaproteobacteria	o__Rhodobacterales	f__Rhodobacteraceae	g__Marivita	s__
seq42	0	0	0	230	174	128	k__Bacteria	p__Firmicutes	c__Bacilli	o__Bacillales	f__Bacillaceae	g__Bacillus	s__
seq43	14	23	13	140	148	161	k__Bacteria	p__Proteobacteria	c__Betaproteobacteria	o__Burkholderiales	f__Oxalobacteraceae	g__Cupriavidus	s__
seq44	143	165	184	0	0	0	k__Bacteria	p__Proteobacteria	c__Epsilonproteobacteria	o__Campylobacterales	f__Helicobacteraceae	g__	s__
seq45	19	0	26	84	210	139	k__Bacteria	p__Actinobacteria	c__Actinobacteria	o__Actinomycetales	f__Yaniellaceae	g__Yaniella	s__
seq46	0	0	18	101	202	151	k__Bacteria	p__Actinobacteria	c__Actinobacteria	o__Actinomycetales	f__Bogoriellaceae	g__Georgenia	s__
seq47	0	467	0	0	0	0	k__Bacteria	p__Bacteroidetes	c__[Saprospirae]	o__[Saprospirales]	f__Saprospiraceae	g__	s__
seq48	76	89	107	40	74	79	k__Bacteria	p__Firmicutes	c__Clostridia	o__Clostridiales	f__Lachnospiraceae	g__	s__
seq49	0	0	246	0	200	10	k__Bacteria	p__Proteobacteria	c__Gammaproteobacteria	o__Oceanospirillales	f__	g__	s__
seq50	0	0	7	116	207	123	k__Bacteria	p__Firmicutes	c__Bacilli	o__Bacillales	f__Staphylococcaceae	g__Salinicoccus	s__
seq51	86	71	32	82	123	57	k__Bacteria	p__Cyanobacteria	c__Chloroplast	o__Streptophyta	f__	g__	s__
seq52	12	0	13	141	106	178	k__Bacteria	p__Actinobacteria	c__Actinobacteria	o__Actinomycetales	f__Propionibacteriaceae	g__	s__
seq53	31	15	43	92	146	119	k__Bacteria	p__Firmicutes	c__Clostridia	o__Clostridiales	f__Peptostreptococcaceae	g__	s__
seq54	27	11	23	143	112	123	k__Bacteria	p__Firmicutes	c__Bacilli	o__Bacillales	f__Bacillaceae	g__Bacillus	s__
seq55	36	68	64	57	99	112	k__Bacteria	p__Proteobacteria	c__Alphaproteobacteria	o__Sphingomonadales	f__Sphingomonadaceae	g__Sphingobium	s__
seq56	0	18	28	113	126	148	k__Bacteria	p__Firmicutes	c__Bacilli	o__Bacillales	f__Planococcaceae
seq57	0	0	0	160	154	107	k__Bacteria	p__Firmicutes	c__Bacilli	o__Bacillales	f__Bacillaceae	g__Bacillus
seq58	12	0	9	99	173	119	k__Bacteria	p__Bacteroidetes	c__Flavobacteriia	o__Flavobacteriales	f__Flavobacteriaceae	g__	s__
seq59	0	0	66	63	153	129	k__Bacteria	p__Firmicutes	c__Bacilli	o__Bacillales
seq60	0	0	229	0	177	0	k__Bacteria	p__Bacteroidetes	c__Flavobacteriia	o__Flavobacteriales	f__Flavobacteriaceae	g__Polaribacter	s__
seq61	0	14	0	100	142	148	k__Bacteria	p__Proteobacteria	c__Gammaproteobacteria	o__Pseudomonadales	f__Pseudomonadaceae	g__Pseudomonas	s__
seq62	39	20	0	92	121	126	k__Bacteria	p__Proteobacteria	c__Alphaproteobacteria	o__Rhizobiales	f__Bradyrhizobiaceae	g__Balneimonas	s__
seq63	118	0	0	123	0	156	k__Bacteria	p__Firmicutes	c__Bacilli	o__Bacillales	f__Bacillaceae	g__Bacillus
seq64	0	0	0	32	325	39	k__Bacteria	p__Firmicutes	c__Bacilli	o__Bacillales	f__Alicyclobacillaceae	g__Alicyclobacillus	s__
seq65	0	114	94	93	87	0	k__Bacteria	p__Firmicutes	c__Bacilli	o__Bacillales
seq66	0	0	106	0	84	196	k__Bacteria	p__Proteobacteria	c__Gammaproteobacteria	o__Oceanospirillales	f__Oceanospirillaceae	g__	s__
seq67	0	0	0	98	150	137	k__Bacteria	p__Firmicutes	c__Bacilli	o__Bacillales	f__Bacillaceae	g__Bacillus	s__foraminis
seq68	152	0	0	144	85	0	k__Bacteria	p__Proteobacteria	c__Alphaproteobacteria	o__Rhizobiales	f__Hyphomicrobiaceae	g__Rhodoplanes	s__
seq69	89	35	40	99	59	52	k__Bacteria	p__Proteobacteria	c__Alphaproteobacteria	o__Sphingomonadales	f__Sphingomonadaceae	g__Kaistobacter	s__
seq70	0	0	0	147	89	137	k__Bacteria	p__Firmicutes	c__Bacilli	o__Bacillales	f__Bacillaceae	g__Bacillus
seq71	28	0	39	86	159	60	k__Bacteria	p__Firmicutes	c__Bacilli	o__Bacillales	f__Bacillaceae	g__Bacillus
seq72	0	0	38	95	128	108	k__Bacteria	p__Firmicutes	c__Bacilli	o__Bacillales	f__Staphylococcaceae	g__Salinicoccus	s__
seq73	34	114	97	40	80	0	k__Bacteria	p__Proteobacteria	c__Alphaproteobacteria	o__Rhizobiales	f__Hyphomicrobiaceae	g__Rhodoplanes	s__
seq74	27	0	0	84	132	121	k__Bacteria	p__Proteobacteria	c__Alphaproteobacteria	o__Sphingomonadales	f__Sphingomonadaceae	g__Sphingomonas	s__
seq75	0	0	0	103	141	119	k__Bacteria	p__Firmicutes	c__Bacilli	o__Bacillales	f__Bacillaceae	g__Bacillus	s__
seq76	52	31	50	52	90	73	k__Bacteria	p__Proteobacteria	c__Gammaproteobacteria	o__Enterobacteriales	f__Enterobacteriaceae
seq77	7	0	19	55	162	104	k__Bacteria	p__Actinobacteria	c__Actinobacteria	o__Actinomycetales	f__Corynebacteriaceae	g__Corynebacterium	s__
seq78	20	0	14	94	111	103	k__Bacteria	p__Firmicutes	c__Bacilli	o__Bacillales	f__Planococcaceae
seq79	17	0	15	106	119	79	k__Bacteria	p__Actinobacteria	c__Actinobacteria	o__Actinomycetales	f__Micrococcaceae	g__	s__
seq80	0	0	0	129	72	134	k__Bacteria	p__Firmicutes	c__Bacilli	o__Bacillales	f__Planococcaceae
seq81	47	58	65	64	46	44	k__Bacteria	p__Proteobacteria	c__Gammaproteobacteria	o__Enterobacteriales	f__Enterobacteriaceae
seq82	0	0	0	90	109	121	k__Bacteria	p__Actinobacteria	c__Actinobacteria	o__Actinomycetales	f__Streptomycetaceae	g__Streptomyces	s__
seq83	39	53	46	46	62	70	k__Bacteria	p__Actinobacteria	c__Actinobacteria	o__Actinomycetales	f__Pseudonocardiaceae
seq84	31	14	41	69	88	67	k__Bacteria	p__Firmicutes	c__Clostridia	o__Clostridiales	f__Clostridiaceae	g__Clostridium
seq85	0	0	0	55	144	109	k__Bacteria	p__Actinobacteria	c__Actinobacteria	o__Actinomycetales	f__Micrococcaceae	g__Microbispora	s__rosea
seq86	79	99	83	5	16	21	k__Bacteria	p__Firmicutes	c__Clostridia	o__Clostridiales	f__Ruminococcaceae	g__Ruminococcus	s__
seq87	0	197	34	0	12	60	k__Bacteria	p__Proteobacteria	c__Alphaproteobacteria	o__Rickettsiales	f__Rickettsiaceae	g__	s__
seq88	0	0	0	104	76	122	k__Bacteria	p__Firmicutes	c__Bacilli	o__Bacillales	f__Bacillaceae	g__Bacillus	s__
seq89	4	0	16	74	135	72	k__Bacteria	p__Firmicutes	c__Bacilli	o__Bacillales	f__Bacillaceae	g__Bacillus
seq90	0	0	180	0	121	0	k__Bacteria	p__Proteobacteria	c__Betaproteobacteria	o__Rhodocyclales	f__Rhodocyclaceae	g__Rhodocyclus	s__
seq91	72	103	122	0	0	0	k__Bacteria	p__Proteobacteria	c__Betaproteobacteria	o__Rhodocyclales	f__Rhodocyclaceae	g__Dechloromonas	s__
seq92	0	73	57	82	0	85	k__Bacteria	p__Proteobacteria	c__Alphaproteobacteria	o__Rhizobiales	f__Hyphomicrobiaceae	g__Rhodoplanes	s__
seq93	0	0	0	0	6	285	k__Bacteria	p__Actinobacteria	c__Actinobacteria	o__Actinomycetales	f__Microbacteriaceae	g__Candidatus Aquiluna	s__rubra
seq94	0	20	23	64	87	91	k__Bacteria	p__Proteobacteria	c__Alphaproteobacteria	o__Rhizobiales	f__Bradyrhizobiaceae	g__Balneimonas	s__
seq95	100	59	59	21	26	16	k__Bacteria	p__Firmicutes	c__Bacilli	o__Bacillales	f__Bacillaceae	g__Bacillus	s__badius
seq96	0	0	0	140	66	75	k__Bacteria	p__Firmicutes	c__Bacilli	o__Bacillales	f__Bacillaceae
seq97	79	96	103	0	0	0	k__Bacteria	p__Proteobacteria	c__Epsilonproteobacteria	o__Campylobacterales	f__Helicobacteraceae	g__	s__
seq98	19	17	13	72	78	79	k__Bacteria	p__Firmicutes	c__Bacilli	o__Bacillales
seq99	0	0	0	68	104	106	k__Bacteria	p__Firmicutes	c__Bacilli	o__Bacillales	f__Bacillaceae	g__Virgibacillus	s__
seq100	0	0	0	82	163	30	k__Bacteria	p__Cyanobacteria	c__Chloroplast	o__Streptophyta	f__	g__	s__
seq101	21	0	31	47	72	103	k__Bacteria	p__Proteobacteria	c__Gammaproteobacteria	o__Pseudomonadales	f__Pseudomonadaceae	g__Pseudomonas	s__
seq102	13	8	12	64	96	81	k__Bacteria	p__Actinobacteria	c__Actinobacteria	o__Actinomycetales	f__Geodermatophilaceae	g__	s__
seq103	0	0	0	64	121	89	k__Bacteria	p__Proteobacteria	c__Alphaproteobacteria	o__Rhizobiales	f__Bradyrhizobiaceae	g__Balneimonas	s__
seq104	36	0	28	75	88	46	k__Bacteria	p__Firmicutes	c__Bacilli	o__Bacillales	f__Planococcaceae	g__Lysinibacillus	s__boronitolerans
seq105	0	266	6	0	0	0	k__Bacteria	p__Proteobacteria	c__Alphaproteobacteria	o__Rhodobacterales	f__Rhodobacteraceae	g__Marivita	s__
seq106	0	0	150	0	120	0	k__Bacteria	p__Proteobacteria	c__Gammaproteobacteria	o__Pseudomonadales	f__Moraxellaceae	g__Acinetobacter
seq107	86	82	95	0	0	0	k__Bacteria	p__Cyanobacteria	c__Chloroplast	o__Streptophyta	f__	g__	s__
seq108	35	33	45	25	88	36	k__Bacteria	p__Cyanobacteria	c__Chloroplast	o__Streptophyta	f__	g__	s__
seq109	35	36	47	34	48	61	k__Bacteria	p__Proteobacteria	c__Gammaproteobacteria	o__Enterobacteriales	f__Enterobacteriaceae
seq110	0	0	0	95	120	46	k__Bacteria	p__Firmicutes	c__Bacilli	o__Bacillales	f__Bacillaceae	g__Bacillus
seq111	0	11	0	83	73	93	k__Bacteria	p__Firmicutes	c__Bacilli	o__Bacillales	f__Bacillaceae	g__Terribacillus	s__
seq112	23	0	36	50	83	67	k__Bacteria	p__Proteobacteria	c__Alphaproteobacteria	o__Rhizobiales	f__Bradyrhizobiaceae	g__Balneimonas	s__
seq113	0	0	0	51	121	83	k__Bacteria	p__Actinobacteria	c__Actinobacteria	o__Actinomycetales
seq114	0	0	0	80	69	105	k__Bacteria	p__Firmicutes	c__Bacilli	o__Bacillales
seq115	134	0	0	119	0	0	k__Bacteria	p__Proteobacteria	c__Gammaproteobacteria	o__Enterobacteriales	f__Enterobacteriaceae	g__Erwinia	s__dispersa
seq116	62	100	89	0	0	0	k__Bacteria	p__Proteobacteria	c__Gammaproteobacteria	o__Xanthomonadales	f__Sinobacteraceae	g__	s__
seq117	20	0	0	70	91	70	k__Bacteria	p__Actinobacteria	c__Actinobacteria	o__Actinomycetales	f__Streptomycetaceae
seq118	16	0	9	114	67	43	k__Bacteria	p__Firmicutes	c__Bacilli	o__Turicibacterales	f__Turicibacteraceae	g__Turicibacter	s__
seq119	87	59	64	0	0	38	k__Bacteria	p__Firmicutes	c__Bacilli	o__Bacillales
seq120	56	41	48	27	32	39	k__Bacteria	p__Proteobacteria	c__Gammaproteobacteria	o__Pseudomonadales	f__Pseudomonadaceae	g__Pseudomonas	s__viridiflava
seq121	0	0	132	0	98	11	k__Bacteria	p__Proteobacteria	c__Gammaproteobacteria	o__[Marinicellales]	f__[Marinicellaceae]	g__Marinicella	s__
seq122	0	0	0	69	109	63	k__Bacteria	p__Bacteroidetes	c__Flavobacteriia	o__Flavobacteriales	f__Flavobacteriaceae	g__	s__
seq123	48	30	44	36	32	49	k__Bacteria	p__Firmicutes	c__Bacilli	o__Bacillales	f__Paenibacillaceae	g__Ammoniphilus	s__
seq124	60	90	85	0	0	0	k__Bacteria	p__Proteobacteria	c__Alphaproteobacteria	o__Rhizobiales	f__	g__	s__
seq125	25	60	39	29	36	46	k__Bacteria	p__Actinobacteria	c__Actinobacteria	o__Actinomycetales	f__Cellulomonadaceae	g__Cellulomonas	s__
seq126	0	234	0	0	0	0	k__Bacteria	p__Proteobacteria	c__Gammaproteobacteria
seq127	35	79	37	38	43	0	k__Bacteria	p__Proteobacteria	c__Alphaproteobacteria	o__Rhizobiales	f__Hyphomicrobiaceae	g__Rhodoplanes	s__
seq128	0	11	103	0	56	62	k__Bacteria	p__Nitrospirae	c__Nitrospira	o__Nitrospirales	f__Nitrospiraceae	g__	s__
seq129	0	0	104	0	126	0	k__Bacteria	p__Bacteroidetes	c__Flavobacteriia	o__Flavobacteriales	f__	g__	s__
seq130	12	10	28	37	94	48	k__Bacteria	p__Firmicutes	c__Clostridia	o__Clostridiales
seq131	16	0	0	79	57	75	k__Bacteria	p__Firmicutes	c__Bacilli	o__Bacillales	f__Planococcaceae
seq132	0	0	10	40	105	71	k__Bacteria	p__Firmicutes	c__Bacilli	o__Bacillales	f__Bacillaceae
seq133	76	74	74	0	0	0	k__Bacteria	p__Proteobacteria	c__Epsilonproteobacteria	o__Campylobacterales	f__Helicobacteraceae	g__	s__
seq134	0	0	0	68	75	80	k__Bacteria	p__Proteobacteria	c__Alphaproteobacteria	o__Rhizobiales	f__Bradyrhizobiaceae	g__Balneimonas	s__
seq135	0	24	0	55	60	81	k__Bacteria	p__Actinobacteria	c__Actinobacteria	o__Actinomycetales	f__Thermomonosporaceae	g__Actinomadura	s__vinacea
seq136	34	44	16	42	37	46	k__Bacteria	p__Firmicutes	c__Clostridia	o__Clostridiales	f__Lachnospiraceae	g__Coprococcus	s__
seq137	12	0	14	49	62	82	k__Bacteria	p__Proteobacteria	c__Gammaproteobacteria	o__Enterobacteriales	f__Enterobacteriaceae
seq138	0	0	0	51	71	97	k__Bacteria	p__Proteobacteria	c__Alphaproteobacteria	o__Sphingomonadales	f__Sphingomonadaceae
seq139	0	0	0	68	76	74	k__Bacteria	p__Firmicutes	c__Bacilli	o__Bacillales	f__Planococcaceae	g__Planomicrobium	s__
seq140	82	43	0	91	0	0	k__Bacteria	p__Proteobacteria	c__Alphaproteobacteria	o__Rhizobiales	f__Hyphomicrobiaceae	g__Rhodoplanes	s__
seq141	30	35	39	31	32	48	k__Bacteria	p__Firmicutes	c__Clostridia	o__Clostridiales	f__Lachnospiraceae	g__Coprococcus	s__
seq142	0	6	103	0	106	0	k__Bacteria
seq143	0	0	0	60	64	88	k__Bacteria	p__Actinobacteria	c__Actinobacteria	o__Actinomycetales	f__Sporichthyaceae	g__	s__
seq144	0	0	0	24	108	71	k__Bacteria	p__Actinobacteria	c__Actinobacteria	o__Actinomycetales	f__Yaniellaceae	g__Yaniella	s__
seq145	0	19	21	51	54	57	k__Bacteria	p__Proteobacteria	c__Alphaproteobacteria	o__Rhodobacterales	f__Rhodobacteraceae	g__Rubellimicrobium	s__
seq146	23	33	38	26	47	34	k__Bacteria	p__Proteobacteria	c__Betaproteobacteria	o__Burkholderiales	f__Comamonadaceae	g__Comamonas	s__
seq147	6	0	0	49	65	81	k__Bacteria	p__Proteobacteria	c__Alphaproteobacteria	o__Sphingomonadales	f__Sphingomonadaceae	g__	s__
seq148	0	53	40	50	58	0	k__Bacteria	p__Proteobacteria	c__Betaproteobacteria	o__Burkholderiales	f__Oxalobacteraceae
seq149	0	0	96	0	105	0	k__Bacteria	p__Proteobacteria	c__Gammaproteobacteria	o__Pseudomonadales	f__Pseudomonadaceae
seq150	84	40	76	0	0	0	k__Bacteria	p__Actinobacteria	c__Actinobacteria	o__Actinomycetales	f__Microbacteriaceae	g__Microbacterium	s__
seq151	51	70	77	0	0	0	k__Bacteria	p__Proteobacteria	c__Deltaproteobacteria	o__Desulfobacterales	f__Desulfobacteraceae	g__Desulfococcus	s__
seq152	18	32	35	19	16	75	k__Bacteria	p__Nitrospirae	c__Nitrospira	o__Nitrospirales	f__Nitrospiraceae	g__Nitrospira	s__
seq153	0	0	0	53	111	30	k__Bacteria	p__Proteobacteria	c__Alphaproteobacteria	o__Rickettsiales	f__mitochondria
seq154	18	44	33	28	25	44	k__Bacteria	p__Gemmatimonadetes	c__Gemm-1	o__	f__	g__	s__
seq155	0	0	0	88	37	67	k__Bacteria	p__Firmicutes	c__Bacilli	o__Bacillales	f__Planococcaceae	g__Sporosarcina	s__ginsengi
seq156	15	0	5	44	45	82	k__Bacteria	p__Proteobacteria	c__Gammaproteobacteria	o__Xanthomonadales	f__Xanthomonadaceae	g__Lysobacter	s__
seq157	0	0	16	30	112	33	k__Bacteria	p__Firmicutes	c__Bacilli	o__Bacillales	f__Bacillaceae	g__	s__
seq158	0	0	0	54	70	67	k__Bacteria	p__Firmicutes	c__Bacilli	o__Bacillales	f__Paenibacillaceae	g__Ammoniphilus	s__
seq159	0	0	22	65	60	43	k__Bacteria	p__Actinobacteria	c__Actinobacteria	o__Actinomycetales	f__Micrococcaceae
seq160	49	0	27	22	47	44	k__Bacteria	p__Proteobacteria	c__Betaproteobacteria	o__Burkholderiales	f__Oxalobacteraceae
seq161	6	7	9	39	60	68	k__Bacteria	p__Proteobacteria	c__Alphaproteobacteria	o__Rhodobacterales	f__Rhodobacteraceae	g__Rubellimicrobium	s__
seq162	0	0	41	0	96	51	k__Bacteria	p__Actinobacteria	c__Actinobacteria	o__Actinomycetales	f__Micromonosporaceae	g__	s__
seq163	0	0	0	41	92	55	k__Bacteria	p__Firmicutes	c__Bacilli	o__Bacillales
seq164	0	0	0	55	72	61	k__Bacteria	p__Firmicutes	c__Bacilli	o__Bacillales	f__Bacillaceae	g__Bacillus	s__badius
seq165	35	34	46	34	38	0	k__Bacteria	p__Proteobacteria	c__Alphaproteobacteria	o__Rhizobiales	f__Bradyrhizobiaceae	g__Bradyrhizobium	s__
seq166	0	186	0	0	0	0	k__Bacteria	p__Proteobacteria	c__Alphaproteobacteria
seq167	0	0	18	45	54	69	k__Bacteria	p__Actinobacteria	c__Actinobacteria	o__Actinomycetales	f__Streptomycetaceae	g__Streptomyces
seq168	0	14	50	0	45	76	k__Bacteria	p__Proteobacteria	c__Alphaproteobacteria	o__Rhodobacterales	f__Rhodobacteraceae
seq169	42	61	17	32	15	16	k__Bacteria	p__Nitrospirae	c__Nitrospira	o__Nitrospirales	f__0319-6A21	g__	s__
seq170	0	0	0	39	76	67	k__Bacteria	p__Proteobacteria	c__Gammaproteobacteria	o__Pseudomonadales	f__Pseudomonadaceae
seq171	91	0	0	90	0	0	k__Bacteria	p__Proteobacteria	c__Gammaproteobacteria	o__Xanthomonadales	f__Xanthomonadaceae	g__	s__
seq172	0	0	0	72	76	33	k__Bacteria	p__Firmicutes	c__Bacilli	o__Bacillales	f__Bacillaceae	g__Bacillus	s__
seq173	48	63	69	0	0	0	k__Bacteria	p__Proteobacteria	c__Gammaproteobacteria	o__Xanthomonadales	f__Sinobacteraceae	g__	s__
seq174	15	23	0	31	45	63	k__Bacteria	p__Proteobacteria	c__Alphaproteobacteria	o__Rhizobiales	f__Bradyrhizobiaceae	g__Balneimonas	s__
seq175	66	0	0	79	0	31	k__Bacteria	p__Actinobacteria	c__Thermoleophilia	o__Gaiellales	f__Gaiellaceae	g__	s__
seq176	4	0	0	0	105	67	k__Bacteria	p__Firmicutes	c__Bacilli	o__Bacillales	f__Bacillaceae	g__Bacillus	s__
seq177	0	0	0	58	51	67	k__Bacteria	p__Firmicutes	c__Bacilli	o__Bacillales	f__Bacillaceae	g__Bacillus	s__
seq178	0	0	0	53	64	58	k__Bacteria	p__Firmicutes	c__Bacilli	o__Bacillales	f__Bacillaceae	g__Bacillus	s__foraminis
seq179	41	0	45	21	22	45	k__Bacteria	p__Actinobacteria	c__Actinobacteria	o__Actinomycetales	f__Streptomycetaceae
seq180	0	0	0	40	71	63	k__Bacteria	p__Actinobacteria	c__Actinobacteria	o__Actinomycetales	f__Pseudonocardiaceae
seq181	0	0	0	32	93	49	k__Bacteria	p__Actinobacteria	c__Actinobacteria	o__Actinomycetales	f__Corynebacteriaceae	g__Corynebacterium	s__
seq182	42	69	61	0	0	0	k__Bacteria	p__Proteobacteria	c__Deltaproteobacteria	o__Syntrophobacterales	f__Syntrophaceae	g__	s__
seq183	0	11	18	25	64	54	k__Bacteria	p__Bacteroidetes	c__Bacteroidia	o__Bacteroidales	f__Bacteroidaceae	g__Bacteroides	s__
seq184	0	0	0	54	52	66	k__Bacteria	p__Actinobacteria	c__Actinobacteria	o__Actinomycetales	f__Mycobacteriaceae	g__Mycobacterium	s__
seq185	0	0	0	102	0	70	k__Bacteria	p__Firmicutes	c__Bacilli	o__Bacillales	f__Paenibacillaceae	g__Ammoniphilus	s__
seq186	0	0	92	0	79	0	k__Bacteria	p__Proteobacteria	c__Gammaproteobacteria	o__Vibrionales	f__Vibrionaceae	g__Vibrio	s__
seq187	0	0	0	47	64	60	k__Bacteria	p__Firmicutes	c__Bacilli	o__Bacillales	f__Bacillaceae	g__Bacillus	s__firmus
seq188	0	0	0	40	92	37	k__Bacteria	p__Firmicutes	c__Bacilli	o__Bacillales	f__Bacillaceae
seq189	73	21	0	55	0	19	k__Bacteria	p__Nitrospirae	c__Nitrospira	o__Nitrospirales	f__0319-6A21	g__	s__
seq190	0	23	18	38	52	37	k__Bacteria	p__Proteobacteria	c__Alphaproteobacteria	o__Rhizobiales	f__Bradyrhizobiaceae	g__Balneimonas	s__
seq191	93	0	0	67	0	7	k__Bacteria	p__Actinobacteria	c__Actinobacteria	o__Actinomycetales	f__	g__	s__
seq192	0	0	0	64	12	90	k__Bacteria	p__Firmicutes	c__Bacilli	o__Lactobacillales	f__Enterococcaceae	g__Enterococcus	s__
seq193	23	25	27	20	40	30	k__Bacteria	p__Proteobacteria	c__Gammaproteobacteria	o__Enterobacteriales	f__Enterobacteriaceae	g__Trabulsiella
seq194	14	23	0	32	58	38	k__Bacteria	p__Proteobacteria	c__Betaproteobacteria	o__Burkholderiales	f__Comamonadaceae
seq195	47	47	70	0	0	0	k__Bacteria	p__Actinobacteria	c__OPB41	o__	f__	g__	s__
seq196	0	0	86	0	68	10	k__Bacteria	p__Proteobacteria	c__Gammaproteobacteria	o__Alteromonadales	f__Alteromonadaceae	g__nsmpVI18	s__
seq197	0	0	0	49	49	66	k__Bacteria	p__Firmicutes	c__Bacilli	o__Bacillales	f__Bacillaceae
seq198	64	11	0	36	0	52	k__Bacteria	p__Actinobacteria	c__Thermoleophilia	o__Gaiellales	f__Gaiellaceae	g__	s__
seq199	35	66	62	0	0	0	k__Bacteria	p__Proteobacteria	c__Betaproteobacteria	o__Rhodocyclales	f__Rhodocyclaceae	g__Dechloromonas	s__
seq200	0	0	0	76	49	38	k__Bacteria	p__Firmicutes	c__Bacilli	o__Bacillales	f__Planococcaceae	g__Solibacillus	s__
seq201	0	0	0	36	73	53	k__Bacteria	p__Firmicutes	c__Bacilli	o__Bacillales	f__Bacillaceae	g__Virgibacillus	s__
seq202	0	59	45	0	57	0	k__Bacteria	p__Acidobacteria	c__Solibacteres	o__Solibacterales	f__Solibacteraceae	g__Candidatus Solibacter	s__
seq203	31	67	18	29	15	0	k__Bacteria	p__Actinobacteria	c__Actinobacteria	o__Actinomycetales	f__Streptomycetaceae
seq204	0	0	20	28	67	45	k__Bacteria	p__Proteobacteria	c__Alphaproteobacteria	o__Rhizobiales	f__Bradyrhizobiaceae	g__Balneimonas	s__
seq205	6	0	0	55	59	39	k__Bacteria	p__Actinobacteria	c__Actinobacteria	o__Actinomycetales	f__Glycomycetaceae	g__Glycomyces	s__
seq206	39	0	0	37	39	44	k__Bacteria	p__Cyanobacteria	c__Chloroplast	o__Streptophyta	f__	g__	s__
seq207	0	0	0	37	74	48	k__Bacteria	p__Firmicutes	c__Bacilli	o__Bacillales	f__Planococcaceae
seq208	0	0	0	34	41	84	k__Bacteria	p__Firmicutes	c__Bacilli	o__Bacillales	f__Planococcaceae
seq209	46	39	71	0	0	0	k__Bacteria	p__Actinobacteria	c__Actinobacteria	o__Actinomycetales	f__Mycobacteriaceae	g__Mycobacterium	s__
seq210	0	0	0	48	52	56	k__Bacteria	p__Proteobacteria	c__Alphaproteobacteria	o__Rhizobiales	f__Rhizobiaceae	g__Agrobacterium	s__
seq211	54	0	34	40	26	0	k__Bacteria	p__Actinobacteria	c__Thermoleophilia	o__Gaiellales	f__Gaiellaceae	g__	s__
seq212	0	5	0	41	58	50	k__Bacteria	p__Firmicutes	c__Bacilli	o__Turicibacterales	f__Turicibacteraceae	g__Turicibacter	s__
seq213	0	0	0	0	0	154	k__Bacteria	p__Proteobacteria	c__Alphaproteobacteria	o__Rhodobacterales	f__Rhodobacteraceae
seq214	10	7	30	41	26	37	k__Bacteria	p__Actinobacteria	c__Actinobacteria	o__Actinomycetales	f__Sporichthyaceae	g__	s__
seq215	0	74	0	24	53	0	k__Bacteria	p__Actinobacteria	c__Actinobacteria	o__Actinomycetales
seq216	0	0	0	68	43	40	k__Bacteria	p__Firmicutes	c__Bacilli	o__Bacillales
seq217	25	28	24	11	28	33	k__Bacteria	p__Firmicutes	c__Clostridia	o__Clostridiales	f__Ruminococcaceae	g__Ruminococcus	s__
seq218	0	0	0	63	52	34	k__Bacteria	p__Firmicutes	c__Bacilli	o__Lactobacillales	f__Aerococcaceae
seq219	40	51	57	0	0	0	k__Bacteria	p__Proteobacteria	c__Deltaproteobacteria	o__Syntrophobacterales	f__Syntrophobacteraceae
seq220	0	0	0	56	29	63	k__Bacteria	p__Actinobacteria	c__Actinobacteria	o__Actinomycetales	f__Sporichthyaceae	g__	s__
seq221	0	78	22	0	27	20	k__Bacteria	p__GN02	c__	o__	f__	g__	s__
seq222	0	0	0	52	40	55	k__Bacteria	p__Actinobacteria	c__Actinobacteria	o__Actinomycetales	f__Dermabacteraceae	g__	s__
seq223	0	0	0	46	63	38	k__Bacteria	p__Proteobacteria	c__Gammaproteobacteria	o__Enterobacteriales	f__Enterobacteriaceae	g__Enterobacter
seq224	0	0	0	0	147	0	k__Bacteria	p__Actinobacteria	c__Actinobacteria	o__Actinomycetales	f__Corynebacteriaceae	g__Corynebacterium	s__
seq225	47	0	51	0	48	0	k__Bacteria	p__Proteobacteria	c__Betaproteobacteria	o__Burkholderiales	f__Oxalobacteraceae	g__	s__
seq226	0	18	61	0	43	23	k__Bacteria	p__Actinobacteria	c__Acidimicrobiia	o__Acidimicrobiales	f__koll13
seq227	0	0	25	24	44	52	k__Bacteria	p__Proteobacteria	c__Alphaproteobacteria	o__Rhizobiales	f__Brucellaceae	g__Ochrobactrum	s__
seq228	0	0	0	0	0	145	k__Bacteria	p__Actinobacteria	c__Actinobacteria	o__Actinomycetales	f__Corynebacteriaceae	g__Corynebacterium	s__
seq229	50	46	48	0	0	0	k__Bacteria	p__Proteobacteria	c__Alphaproteobacteria	o__Rhizobiales	f__Methylocystaceae	g__Methylosinus	s__
seq230	29	51	64	0	0	0	k__Bacteria	p__Proteobacteria	c__Betaproteobacteria	o__Rhodocyclales	f__Rhodocyclaceae
seq231	14	0	21	32	33	44	k__Bacteria	p__Proteobacteria	c__Alphaproteobacteria	o__Sphingomonadales	f__Sphingomonadaceae	g__	s__
seq232	11	0	0	37	48	48	k__Bacteria	p__Proteobacteria	c__Alphaproteobacteria	o__Rhizobiales	f__Hyphomicrobiaceae	g__Devosia	s__
seq233	0	0	0	58	39	47	k__Bacteria	p__Firmicutes	c__Bacilli	o__Bacillales	f__Bacillaceae	g__Bacillus	s__
seq234	0	0	0	0	90	54	k__Bacteria	p__Actinobacteria	c__Actinobacteria	o__Actinomycetales	f__Geodermatophilaceae	g__Geodermatophilus
seq235	29	65	49	0	0	0	k__Bacteria	p__Firmicutes	c__Clostridia	o__Clostridiales	f__Christensenellaceae	g__	s__
seq236	38	20	17	46	0	21	k__Bacteria	p__Actinobacteria	c__Actinobacteria	o__Actinomycetales	f__Thermomonosporaceae	g__Actinoallomurus
seq237	42	38	29	32	0	0	k__Bacteria	p__Acidobacteria	c__Acidobacteriia	o__Acidobacteriales	f__Koribacteraceae	g__	s__
seq238	5	0	0	24	67	45	k__Bacteria	p__Firmicutes	c__Bacilli	o__Bacillales
seq239	0	0	0	89	0	51	k__Bacteria	p__Firmicutes	c__Bacilli	o__Bacillales	f__Bacillaceae	g__Bacillus	s__
seq240	0	63	34	0	20	22	k__Bacteria	p__Proteobacteria	c__Gammaproteobacteria	o__Alteromonadales	f__Alteromonadaceae	g__Agarivorans	s__
seq241	0	0	21	32	56	30	k__Bacteria	p__Firmicutes	c__Bacilli	o__Bacillales	f__Planococcaceae	g__Lysinibacillus
seq242	73	0	0	65	0	0	k__Bacteria	p__Proteobacteria	c__Gammaproteobacteria	o__Xanthomonadales	f__Xanthomonadaceae	g__	s__
seq243	0	0	52	0	86	0	k__Bacteria	p__Actinobacteria	c__Actinobacteria	o__Actinomycetales
seq244	0	0	0	41	48	48	k__Bacteria	p__Firmicutes	c__Bacilli	o__Bacillales	f__Bacillaceae
seq245	41	46	49	0	0	0	k__Bacteria	p__Actinobacteria	c__Actinobacteria	o__Actinomycetales	f__Pseudonocardiaceae	g__Pseudonocardia	s__
seq246	33	54	49	0	0	0	k__Bacteria	p__Proteobacteria	c__Deltaproteobacteria	o__Syntrophobacterales	f__Syntrophaceae	g__Syntrophus	s__
seq247	24	41	27	30	14	0	k__Bacteria	p__Actinobacteria	c__Thermoleophilia	o__Gaiellales	f__Gaiellaceae	g__	s__
seq248	0	0	0	53	43	40	k__Bacteria	p__Actinobacteria	c__Actinobacteria	o__Actinomycetales
seq249	0	36	56	0	43	0	k__Bacteria	p__Actinobacteria	c__Actinobacteria	o__Actinomycetales	f__	g__	s__
seq250	0	0	0	52	25	58	k__Bacteria	p__Actinobacteria	c__Actinobacteria	o__Actinomycetales	f__Cellulomonadaceae	g__Cellulomonas	s__
seq251	32	40	62	0	0	0	k__Bacteria	p__Proteobacteria	c__Gammaproteobacteria	o__Chromatiales	f__Chromatiaceae	g__	s__
seq252	0	0	9	42	37	46	k__Bacteria	p__Firmicutes	c__Bacilli	o__Bacillales	f__Bacillaceae	g__Bacillus	s__badius
seq253	75	0	0	58	0	0	k__Bacteria	p__Proteobacteria	c__Gammaproteobacteria	o__Xanthomonadales	f__Xanthomonadaceae	g__Rhodanobacter	s__
seq254	65	0	0	67	0	0	k__Bacteria	p__Actinobacteria	c__Actinobacteria	o__Actinomycetales	f__Micromonosporaceae	g__	s__
seq255	15	9	32	18	30	28	k__Bacteria	p__Bacteroidetes	c__Bacteroidia	o__Bacteroidales	f__Porphyromonadaceae
seq256	45	0	0	62	25	0	k__Bacteria	p__Actinobacteria	c__Actinobacteria	o__Actinomycetales
seq257	0	0	79	0	52	0	k__Bacteria	p__Proteobacteria	c__Alphaproteobacteria	o__Rhizobiales	f__Hyphomicrobiaceae	g__Rhodoplanes	s__
seq258	50	29	51	0	0	0	k__Bacteria	p__Firmicutes	c__Bacilli	o__Bacillales	f__Planococcaceae	g__Planomicrobium	s__
seq259	0	0	0	45	47	38	k__Bacteria	p__Actinobacteria	c__Actinobacteria	o__Actinomycetales	f__Mycobacteriaceae	g__Mycobacterium	s__
seq260	0	0	24	19	45	41	k__Bacteria	p__Actinobacteria	c__Actinobacteria	o__Actinomycetales	f__Nocardioidaceae	g__	s__
seq261	18	22	16	26	17	29	k__Bacteria	p__Firmicutes	c__Clostridia	o__Clostridiales	f__Ruminococcaceae	g__Oscillospira	s__
seq262	5	0	6	31	49	37	k__Bacteria	p__Proteobacteria	c__Gammaproteobacteria	o__Xanthomonadales	f__Xanthomonadaceae	g__Lysobacter	s__
seq263	0	0	0	37	52	39	k__Bacteria	p__Firmicutes	c__Bacilli	o__Bacillales	f__Bacillaceae	g__Bacillus	s__
seq264	0	0	0	40	48	40	k__Bacteria	p__Proteobacteria	c__Deltaproteobacteria	o__Myxococcales
seq265	26	43	58	0	0	0	k__Bacteria	p__Proteobacteria	c__Betaproteobacteria	o__Rhodocyclales	f__Rhodocyclaceae
seq266	39	0	0	57	31	0	k__Bacteria	p__Actinobacteria	c__Actinobacteria	o__Actinomycetales	f__Micromonosporaceae	g__	s__
seq267	0	0	0	38	42	46	k__Bacteria	p__Proteobacteria	c__Alphaproteobacteria	o__Rhizobiales	f__Hyphomicrobiaceae	g__Devosia	s__
seq268	0	0	0	21	56	49	k__Bacteria	p__Proteobacteria	c__Betaproteobacteria	o__Burkholderiales	f__Oxalobacteraceae	g__	s__
seq269	16	12	16	22	24	35	k__Bacteria	p__Firmicutes	c__Clostridia	o__Clostridiales	f__Ruminococcaceae	g__Ruminococcus	s__
seq270	0	125	0	0	0	0	k__Bacteria	p__Proteobacteria	c__Alphaproteobacteria	o__Rhodobacterales	f__Rhodobacteraceae	g__	s__
seq271	0	0	0	32	48	45	k__Bacteria	p__Proteobacteria	c__Alphaproteobacteria	o__Sphingomonadales	f__Sphingomonadaceae	g__	s__
seq272	0	0	62	0	62	0	k__Bacteria	p__Proteobacteria	c__Alphaproteobacteria	o__Rhodospirillales	f__Rhodospirillaceae	g__Azospirillum	s__
seq273	16	0	0	49	25	33	k__Bacteria	p__Proteobacteria	c__Gammaproteobacteria	o__Chromatiales
seq274	0	0	0	25	47	51	k__Bacteria	p__Proteobacteria	c__Gammaproteobacteria	o__Pseudomonadales	f__Pseudomonadaceae	g__Pseudomonas	s__viridiflava
seq275	26	25	51	20	0	0	k__Bacteria	p__Actinobacteria	c__Thermoleophilia	o__Gaiellales	f__Gaiellaceae	g__	s__
seq276	0	0	0	29	46	47	k__Bacteria	p__Firmicutes	c__Clostridia	o__Clostridiales
seq277	6	0	0	29	36	50	k__Bacteria	p__Proteobacteria	c__Alphaproteobacteria	o__Rhizobiales	f__Phyllobacteriaceae
seq278	0	40	47	0	22	12	k__Bacteria	p__Proteobacteria	c__Epsilonproteobacteria	o__Campylobacterales	f__Campylobacteraceae	g__Arcobacter	s__
seq279	35	0	26	0	0	59	k__Bacteria	p__Actinobacteria	c__Thermoleophilia	o__Gaiellales	f__Gaiellaceae	g__	s__
seq280	0	0	6	31	52	31	k__Bacteria	p__[Thermi]	c__Deinococci	o__Deinococcales	f__Trueperaceae	g__B-42	s__
seq281	14	15	17	11	13	49	k__Bacteria	p__Proteobacteria	c__Alphaproteobacteria	o__Rhodospirillales	f__Rhodospirillaceae	g__	s__
seq282	34	15	16	43	10	0	k__Bacteria	p__Verrucomicrobia	c__[Spartobacteria]	o__[Chthoniobacterales]	f__[Chthoniobacteraceae]	g__DA101	s__
seq283	0	0	0	36	34	48	k__Bacteria	p__Actinobacteria	c__Actinobacteria	o__Actinomycetales	f__Nocardioidaceae	g__Actinopolymorpha	s__
seq284	0	0	0	24	49	45	k__Bacteria	p__Proteobacteria	c__Alphaproteobacteria	o__Sphingomonadales	f__Sphingomonadaceae
seq285	2	0	7	33	43	31	k__Bacteria	p__Proteobacteria	c__Alphaproteobacteria	o__Rhodospirillales	f__Acetobacteraceae	g__Roseococcus	s__
seq286	27	18	19	34	17	0	k__Bacteria	p__Proteobacteria	c__Alphaproteobacteria	o__Rhizobiales	f__Hyphomicrobiaceae	g__Pedomicrobium	s__
seq287	56	58	0	0	0	0	k__Bacteria	p__Acidobacteria	c__Acidobacteriia	o__Acidobacteriales	f__Koribacteraceae	g__	s__
seq288	34	38	42	0	0	0	k__Bacteria	p__Proteobacteria	c__Deltaproteobacteria	o__Desulfobacterales	f__Desulfobulbaceae	g__Desulfobulbus	s__
seq289	0	0	0	35	42	37	k__Bacteria	p__Proteobacteria	c__Alphaproteobacteria	o__Rhizobiales	f__Bradyrhizobiaceae	g__	s__
seq290	0	0	0	31	43	40	k__Bacteria	p__Proteobacteria	c__Alphaproteobacteria	o__Rhizobiales	f__Rhizobiaceae	g__Sinorhizobium	s__
seq291	0	0	0	0	0	114	k__Bacteria	p__Proteobacteria	c__Alphaproteobacteria
seq292	24	17	30	21	21	0	k__Bacteria	p__Firmicutes	c__Clostridia	o__Clostridiales	f__Lachnospiraceae
seq293	41	0	72	0	0	0	k__Bacteria	p__Proteobacteria	c__Betaproteobacteria	o__Rhodocyclales	f__Rhodocyclaceae	g__Dechloromonas	s__
seq294	0	91	0	0	22	0	k__Bacteria	p__Actinobacteria	c__Actinobacteria	o__Actinomycetales
seq295	0	0	0	56	57	0	k__Bacteria	p__Firmicutes	c__Bacilli	o__Bacillales	f__Planococcaceae	g__Planomicrobium	s__
seq296	0	0	0	0	113	0	k__Bacteria	p__Firmicutes	c__Bacilli	o__Bacillales	f__Paenibacillaceae	g__Ammoniphilus	s__
seq297	0	0	0	0	64	49	k__Bacteria	p__Actinobacteria	c__Actinobacteria	o__Actinomycetales	f__Geodermatophilaceae	g__Geodermatophilus	s__
seq298	0	0	0	28	48	35	k__Bacteria	p__Bacteroidetes	c__Cytophagia	o__Cytophagales	f__Cytophagaceae	g__Pontibacter	s__
seq299	0	0	0	30	38	43	k__Bacteria	p__Proteobacteria	c__Gammaproteobacteria	o__Enterobacteriales	f__Enterobacteriaceae
seq300	24	29	0	41	16	0	k__Bacteria	p__Proteobacteria	c__Alphaproteobacteria	o__Rhizobiales	f__Hyphomicrobiaceae	g__	s__
seq301	0	0	50	0	60	0	k__Bacteria	p__Proteobacteria	c__Betaproteobacteria	o__Nitrosomonadales	f__Nitrosomonadaceae	g__	s__
seq302	0	44	65	0	0	0	k__Bacteria	p__Firmicutes	c__Clostridia	o__Clostridiales	f__[Mogibacteriaceae]	g__	s__
seq303	0	0	5	29	42	33	k__Bacteria	p__Proteobacteria	c__Alphaproteobacteria	o__Caulobacterales	f__Caulobacteraceae	g__Caulobacter	s__
seq304	0	0	0	28	35	46	k__Bacteria	p__Proteobacteria	c__Gammaproteobacteria	o__Enterobacteriales	f__Enterobacteriaceae	g__Klebsiella	s__
seq305	0	0	0	32	33	44	k__Bacteria	p__Firmicutes	c__Bacilli	o__Bacillales	f__Bacillaceae
seq306	28	39	41	0	0	0	k__Bacteria	p__Proteobacteria	c__Deltaproteobacteria	o__Syntrophobacterales	f__Syntrophaceae	g__Syntrophus	s__
seq307	0	0	12	0	12	84	k__Bacteria	p__Actinobacteria	c__Acidimicrobiia	o__Acidimicrobiales	f__koll13	g__mixed	s__culture isolate koll13
seq308	0	0	0	0	50	58	k__Bacteria	p__Proteobacteria	c__Betaproteobacteria	o__Burkholderiales	f__Oxalobacteraceae
seq309	34	35	38	0	0	0	k__Bacteria	p__Proteobacteria	c__Deltaproteobacteria	o__Syntrophobacterales	f__Syntrophaceae	g__	s__
seq310	0	0	0	52	34	21	k__Bacteria	p__Firmicutes	c__Bacilli	o__Bacillales	f__Bacillaceae	g__Bacillus
seq311	23	16	19	15	13	20	k__Bacteria	p__Proteobacteria	c__Alphaproteobacteria	o__Rhizobiales	f__Rhizobiaceae	g__Agrobacterium	s__
seq312	0	106	0	0	0	0	k__Bacteria	p__Proteobacteria	c__TA18	o__CV90	f__	g__	s__
seq313	0	106	0	0	0	0	k__Bacteria	p__Acidobacteria	c__Holophagae	o__Holophagales	f__	g__	s__
seq314	0	0	7	25	31	43	k__Bacteria	p__Actinobacteria	c__Actinobacteria	o__Actinomycetales	f__Dietziaceae	g__Dietzia	s__
seq315	0	0	0	35	28	43	k__Bacteria	p__Proteobacteria	c__Gammaproteobacteria	o__Pseudomonadales	f__Pseudomonadaceae	g__Pseudomonas	s__
seq316	0	58	32	0	12	3	k__Bacteria	p__Acidobacteria	c__Acidobacteriia	o__Acidobacteriales	f__Koribacteraceae	g__Candidatus Koribacter	s__
seq317	0	0	0	36	32	37	k__Bacteria	p__Proteobacteria	c__Betaproteobacteria	o__Burkholderiales	f__Alcaligenaceae	g__	s__
seq318	0	0	0	23	49	33	k__Bacteria	p__Firmicutes	c__Bacilli	o__Bacillales	f__Bacillaceae	g__Bacillus	s__
seq319	0	0	0	63	0	42	k__Bacteria	p__Actinobacteria	c__Actinobacteria	o__Actinomycetales	f__Microbacteriaceae	g__	s__
seq320	26	31	47	0	0	0	k__Bacteria	p__Proteobacteria	c__Deltaproteobacteria	o__Desulfuromonadales	f__Desulfuromonadaceae	g__	s__
seq321	0	0	57	0	42	5	k__Bacteria	p__Proteobacteria	c__Gammaproteobacteria	o__Oceanospirillales	f__Oceanospirillaceae	g__	s__
seq322	0	0	0	46	0	58	k__Bacteria	p__Actinobacteria	c__Actinobacteria	o__Actinomycetales	f__Pseudonocardiaceae	g__Saccharopolyspora	s__
seq323	0	0	0	28	33	43	k__Bacteria	p__Proteobacteria	c__Alphaproteobacteria	o__Rhizobiales	f__Bradyrhizobiaceae	g__Balneimonas	s__
seq324	0	0	0	20	49	35	k__Bacteria	p__Actinobacteria	c__Actinobacteria	o__Actinomycetales	f__Streptomycetaceae	g__Streptomyces	s__
seq325	0	0	0	0	55	49	k__Bacteria	p__Firmicutes	c__Bacilli	o__Bacillales	f__Bacillaceae	g__Bacillus
seq326	48	0	0	55	0	0	k__Bacteria	p__Actinobacteria	c__Actinobacteria	o__Actinomycetales
seq327	11	18	26	17	31	0	k__Bacteria	p__Proteobacteria	c__Alphaproteobacteria	o__Rhodospirillales	f__Acetobacteraceae	g__	s__
seq328	0	36	0	33	34	0	k__Bacteria	p__Actinobacteria	c__Thermoleophilia	o__Gaiellales	f__Gaiellaceae	g__	s__
seq329	0	0	0	31	35	37	k__Bacteria	p__Proteobacteria	c__Betaproteobacteria	o__Burkholderiales
seq330	21	0	12	22	26	21	k__Bacteria	p__Proteobacteria	c__Alphaproteobacteria	o__Rhizobiales	f__Hyphomicrobiaceae	g__Devosia	s__
seq331	0	0	0	50	23	29	k__Bacteria	p__Firmicutes	c__Bacilli	o__Bacillales	f__Paenibacillaceae	g__Ammoniphilus	s__
seq332	0	0	0	35	67	0	k__Bacteria	p__Proteobacteria	c__Betaproteobacteria
seq333	0	0	0	0	48	54	k__Bacteria	p__Firmicutes	c__Bacilli	o__Bacillales	f__Bacillaceae	g__Bacillus	s__
seq334	39	0	0	61	0	0	k__Bacteria	p__Firmicutes	c__Bacilli	o__Bacillales	f__Bacillaceae	g__Bacillus
seq335	49	0	0	51	0	0	k__Bacteria	p__Firmicutes	c__Bacilli	o__Bacillales	f__Alicyclobacillaceae	g__Alicyclobacillus	s__
seq336	25	38	36	0	0	0	k__Bacteria	p__Proteobacteria	c__Gammaproteobacteria	o__HOC36	f__	g__	s__
seq337	25	32	0	22	19	0	k__Bacteria	p__Proteobacteria	c__Alphaproteobacteria	o__Rhizobiales	f__Hyphomicrobiaceae	g__Rhodoplanes	s__
seq338	23	36	38	0	0	0	k__Bacteria	p__Proteobacteria	c__Gammaproteobacteria	o__Alteromonadales	f__125ds10	g__	s__
seq339	0	0	60	0	37	0	k__Bacteria	p__Firmicutes	c__Clostridia	o__Clostridiales	f__Ruminococcaceae	g__Oscillospira	s__
seq340	0	0	50	0	47	0	k__Bacteria	p__Proteobacteria	c__Betaproteobacteria	o__Burkholderiales	f__Comamonadaceae
seq341	0	0	0	21	32	44	k__Bacteria	p__Firmicutes	c__Bacilli	o__Bacillales	f__Planococcaceae	g__	s__
seq342	0	0	0	20	47	30	k__Bacteria	p__Firmicutes	c__Bacilli	o__Bacillales
seq343	0	0	16	4	76	0	k__Bacteria	p__Proteobacteria	c__Gammaproteobacteria	o__Enterobacteriales	f__Enterobacteriaceae
seq344	0	0	19	0	0	77	k__Bacteria	p__Firmicutes	c__Bacilli	o__Bacillales	f__Bacillaceae	g__Bacillus	s__
seq345	0	0	9	24	40	23	k__Bacteria	p__Proteobacteria	c__Betaproteobacteria	o__Burkholderiales	f__Oxalobacteraceae	g__Cupriavidus	s__
seq346	31	19	0	32	13	0	k__Bacteria	p__Proteobacteria	c__Alphaproteobacteria	o__Rhodospirillales	f__Rhodospirillaceae	g__	s__
seq347	7	27	0	16	16	29	k__Bacteria	p__Firmicutes	c__Bacilli	o__Bacillales	f__Planococcaceae	g__Planomicrobium	s__
seq348	0	38	57	0	0	0	k__Bacteria	p__Acidobacteria	c__Solibacteres	o__Solibacterales	f__Solibacteraceae	g__Candidatus Solibacter	s__
seq349	0	0	28	0	26	41	k__Bacteria	p__Proteobacteria	c__Alphaproteobacteria
seq350	0	0	0	23	49	23	k__Bacteria	p__Firmicutes	c__Bacilli	o__Bacillales	f__Bacillaceae	g__Lentibacillus	s__
seq351	0	0	0	14	0	81	k__Bacteria	p__Actinobacteria	c__MB-A2-108	o__0319-7L14	f__	g__	s__
seq352	0	0	0	0	41	54	k__Bacteria	p__Proteobacteria	c__Alphaproteobacteria	o__Sphingomonadales	f__Sphingomonadaceae	g__Sphingomonas	s__
seq353	0	94	0	0	0	0	k__Bacteria	p__Chloroflexi	c__Anaerolineae	o__Caldilineales	f__Caldilineaceae	g__	s__
seq354	0	0	0	51	27	16	k__Bacteria	p__Firmicutes	c__Bacilli	o__Bacillales	f__Planococcaceae	g__Solibacillus	s__
seq355	0	0	0	32	62	0	k__Bacteria	p__Proteobacteria	c__Betaproteobacteria	o__Burkholderiales	f__Oxalobacteraceae	g__	s__
seq356	0	0	0	0	0	94	k__Bacteria	p__Actinobacteria	c__Actinobacteria	o__Actinomycetales	f__Nocardioidaceae	g__	s__
seq357	12	0	0	21	29	31	k__Bacteria	p__Actinobacteria	c__Actinobacteria	o__Actinomycetales	f__Pseudonocardiaceae	g__Saccharomonospora	s__
seq358	40	0	0	53	0	0	k__Bacteria	p__Firmicutes	c__Bacilli	o__Bacillales	f__Bacillaceae	g__Bacillus	s__foraminis
seq359	0	51	27	0	15	0	k__Bacteria	p__Gemmatimonadetes	c__Gemm-1	o__	f__	g__	s__
seq360	0	0	0	25	23	45	k__Bacteria	p__Actinobacteria	c__Actinobacteria	o__Actinomycetales	f__Pseudonocardiaceae	g__Pseudonocardia	s__
seq361	51	16	25	0	0	0	k__Bacteria	p__Actinobacteria	c__Actinobacteria	o__Actinomycetales
seq362	0	0	0	30	21	41	k__Bacteria	p__Firmicutes	c__Bacilli	o__Bacillales	f__Bacillaceae	g__Geobacillus	s__
seq363	0	0	0	19	38	35	k__Bacteria	p__Proteobacteria	c__Alphaproteobacteria	o__Rhodospirillales	f__Rhodospirillaceae	g__Azospirillum	s__
seq364	0	0	0	29	25	38	k__Bacteria	p__Actinobacteria	c__Actinobacteria	o__Actinomycetales	f__Streptomycetaceae	g__Streptomyces
seq365	0	0	0	19	56	17	k__Bacteria	p__Firmicutes	c__Bacilli	o__Bacillales	f__Bacillaceae	g__Gracilibacillus	s__halotolerans
seq366	0	91	0	0	0	0	k__Bacteria	p__Verrucomicrobia	c__[Pedosphaerae]	o__	f__	g__	s__
seq367	28	43	0	19	0	0	k__Bacteria	p__Acidobacteria	c__DA052	o__Ellin6513	f__	g__	s__
seq368	0	90	0	0	0	0	k__Bacteria	p__Actinobacteria	c__Actinobacteria	o__Actinomycetales	f__Streptomycetaceae
seq369	0	0	9	0	5	76	k__Bacteria	p__Proteobacteria	c__Alphaproteobacteria
seq370	0	0	0	33	23	34	k__Bacteria	p__Firmicutes	c__Bacilli	o__Bacillales	f__Bacillaceae	g__Bacillus
seq371	34	0	55	0	0	0	k__Bacteria	p__Actinobacteria	c__Thermoleophilia	o__Gaiellales	f__	g__	s__
seq372	5	0	41	0	43	0	k__Bacteria	p__Proteobacteria	c__Alphaproteobacteria	o__Rhodobacterales	f__Rhodobacteraceae
seq373	22	19	24	0	24	0	k__Bacteria	p__Proteobacteria	c__Betaproteobacteria	o__Burkholderiales	f__Burkholderiaceae	g__Burkholderia	s__
seq374	0	0	0	20	42	27	k__Bacteria	p__Proteobacteria	c__Epsilonproteobacteria	o__Campylobacterales	f__Campylobacteraceae	g__Arcobacter
seq375	0	0	0	30	29	30	k__Bacteria	p__Firmicutes	c__Bacilli	o__Bacillales
seq376	0	0	0	28	61	0	k__Bacteria	p__Actinobacteria	c__Actinobacteria	o__Actinomycetales	f__Nocardioidaceae	g__	s__
seq377	0	0	0	19	27	43	k__Bacteria	p__Proteobacteria	c__Gammaproteobacteria	o__Enterobacteriales	f__Enterobacteriaceae
seq378	0	0	0	0	0	89	k__Bacteria	p__Bacteroidetes	c__Flavobacteriia	o__Flavobacteriales	f__Cryomorphaceae
seq379	18	25	45	0	0	0	k__Bacteria	p__Proteobacteria	c__Deltaproteobacteria	o__Syntrophobacterales	f__Syntrophaceae	g__	s__
seq380	7	11	0	15	23	32	k__Bacteria	p__Bacteroidetes	c__Cytophagia	o__Cytophagales	f__Cytophagaceae
seq381	0	0	43	0	27	17	k__Bacteria	p__Bacteroidetes	c__Flavobacteriia	o__Flavobacteriales	f__Cryomorphaceae	g__Crocinitomix	s__
seq382	0	0	0	23	36	28	k__Bacteria	p__Proteobacteria	c__Betaproteobacteria	o__Burkholderiales	f__Oxalobacteraceae
seq383	0	0	0	29	31	27	k__Bacteria	p__Firmicutes	c__Bacilli	o__Bacillales	f__Bacillaceae
seq384	31	34	0	0	0	21	k__Bacteria	p__Actinobacteria	c__Actinobacteria	o__Actinomycetales	f__Mycobacteriaceae	g__Mycobacterium	s__
seq385	39	0	0	47	0	0	k__Bacteria	p__Firmicutes	c__Bacilli	o__Bacillales
seq386	0	26	15	24	21	0	k__Bacteria	p__Proteobacteria	c__Alphaproteobacteria	o__Rhodospirillales	f__Acetobacteraceae	g__	s__
seq387	0	44	0	0	42	0	k__Bacteria	p__Proteobacteria	c__Alphaproteobacteria	o__Rhizobiales	f__Hyphomicrobiaceae	g__Rhodoplanes	s__
seq388	0	0	0	17	35	34	k__Bacteria	p__Actinobacteria	c__Actinobacteria	o__Actinomycetales	f__Nocardioidaceae	g__Actinopolymorpha	s__
seq389	0	0	0	23	39	24	k__Bacteria	p__Actinobacteria	c__Actinobacteria	o__Actinomycetales	f__Sporichthyaceae	g__	s__
seq390	4	0	0	36	10	35	k__Bacteria	p__[Thermi]	c__Deinococci	o__Deinococcales	f__Trueperaceae	g__B-42	s__
seq391	0	40	0	0	45	0	k__Bacteria	p__Actinobacteria	c__Actinobacteria	o__Actinomycetales	f__Pseudonocardiaceae	g__Pseudonocardia	s__
seq392	0	0	0	48	0	37	k__Bacteria	p__Firmicutes	c__Bacilli	o__Bacillales	f__Bacillaceae
seq393	0	0	0	0	52	33	k__Bacteria	p__Firmicutes	c__Bacilli	o__Bacillales	f__Paenibacillaceae	g__Ammoniphilus	s__
seq394	10	12	17	8	20	17	k__Bacteria	p__Proteobacteria	c__Betaproteobacteria	o__Burkholderiales	f__Alcaligenaceae	g__	s__
seq395	24	29	31	0	0	0	k__Bacteria	p__Chloroflexi	c__Anaerolineae	o__Anaerolineales	f__Anaerolinaceae	g__Longilinea	s__
seq396	16	30	38	0	0	0	k__Bacteria	p__Bacteroidetes	c__Bacteroidia	o__Bacteroidales	f__	g__	s__
seq397	0	0	0	25	29	30	k__Bacteria	p__Actinobacteria	c__Actinobacteria	o__Actinomycetales	f__Nocardiaceae	g__Rhodococcus	s__
seq398	0	0	0	15	29	40	k__Bacteria	p__Proteobacteria	c__Alphaproteobacteria	o__Sphingomonadales	f__Sphingomonadaceae	g__	s__
seq399	0	0	0	16	31	37	k__Bacteria	p__Firmicutes	c__Bacilli	o__Bacillales	f__Bacillaceae	g__Bacillus
seq400	0	0	0	0	0	84	k__Bacteria	p__Actinobacteria	c__Actinobacteria	o__Actinomycetales	f__Micromonosporaceae	g__	s__
seq401	0	0	0	0	0	84	k__Bacteria	p__Bacteroidetes	c__Flavobacteriia	o__Flavobacteriales	f__Cryomorphaceae
seq402	12	0	0	0	0	71	k__Bacteria	p__Proteobacteria	c__Alphaproteobacteria	o__Rhizobiales	f__Hyphomicrobiaceae	g__Rhodoplanes	s__
seq403	0	0	0	40	43	0	k__Bacteria	p__Proteobacteria	c__Gammaproteobacteria
seq404	0	0	0	18	43	22	k__Bacteria	p__Firmicutes	c__Bacilli	o__Bacillales	f__Bacillaceae	g__Virgibacillus	s__
seq405	0	0	0	25	20	38	k__Bacteria	p__Actinobacteria	c__Actinobacteria	o__Actinomycetales	f__Geodermatophilaceae
seq406	28	22	32	0	0	0	k__Bacteria	p__Actinobacteria	c__Actinobacteria	o__Actinomycetales	f__Microbacteriaceae	g__Clavibacter	s__
seq407	0	0	9	22	17	34	k__Bacteria	p__Firmicutes	c__Bacilli	o__Bacillales	f__Paenibacillaceae	g__Paenibacillus	s__
seq408	0	0	0	19	28	35	k__Bacteria	p__Firmicutes	c__Bacilli	o__Bacillales	f__Bacillaceae	g__Terribacillus	s__
seq409	12	0	12	23	9	25	k__Bacteria	p__Firmicutes	c__Bacilli	o__Bacillales	f__Paenibacillaceae	g__Paenibacillus	s__
seq410	54	0	0	27	0	0	k__Bacteria	p__Actinobacteria	c__Actinobacteria	o__Actinomycetales	f__Streptomycetaceae	g__Streptomyces	s__
seq411	0	41	25	0	13	2	k__Bacteria	p__Proteobacteria	c__Alphaproteobacteria	o__BD7-3	f__	g__	s__
seq412	0	81	0	0	0	0	k__Bacteria	p__Actinobacteria	c__Thermoleophilia	o__Gaiellales	f__Gaiellaceae	g__	s__
seq413	0	0	0	33	27	21	k__Bacteria	p__Actinobacteria	c__Actinobacteria	o__Actinomycetales	f__Actinosynnemataceae	g__Saccharothrix	s__
seq414	5	0	0	6	0	69	k__Bacteria	p__Actinobacteria	c__MB-A2-108	o__0319-7L14	f__	g__	s__
seq415	17	0	0	25	21	17	k__Bacteria	p__Actinobacteria	c__Actinobacteria	o__Actinomycetales	f__Micrococcaceae	g__	s__
seq416	0	0	0	18	33	29	k__Bacteria	p__Proteobacteria	c__Betaproteobacteria	o__Burkholderiales
seq417	0	0	0	35	0	45	k__Bacteria	p__Proteobacteria	c__Betaproteobacteria	o__Burkholderiales	f__Oxalobacteraceae	g__	s__
seq418	26	29	24	0	0	0	k__Bacteria	p__Proteobacteria	c__Deltaproteobacteria	o__GW-28	f__	g__	s__
seq419	35	0	0	44	0	0	k__Bacteria	p__Proteobacteria	c__Gammaproteobacteria	o__Enterobacteriales	f__Enterobacteriaceae
seq420	0	0	41	0	27	11	k__Bacteria	p__Proteobacteria	c__Gammaproteobacteria
seq421	0	0	35	0	44	0	k__Bacteria	p__Actinobacteria	c__Actinobacteria	o__Actinomycetales
seq422	0	0	0	36	0	43	k__Bacteria	p__Actinobacteria	c__Actinobacteria	o__Actinomycetales	f__Geodermatophilaceae
seq423	22	31	25	0	0	0	k__Bacteria	p__Acidobacteria	c__Acidobacteria-6	o__iii1-15	f__	g__	s__
seq424	22	26	30	0	0	0	k__Bacteria	p__Bacteroidetes	c__Bacteroidia	o__Bacteroidales	f__	g__	s__
seq425	15	0	0	14	21	28	k__Bacteria	p__Actinobacteria	c__Actinobacteria	o__Actinomycetales
seq426	38	0	0	39	0	0	k__Bacteria	p__Proteobacteria	c__Deltaproteobacteria	o__Syntrophobacterales	f__Syntrophobacteraceae	g__	s__
seq427	0	0	3	23	33	18	k__Bacteria	p__Firmicutes	c__Bacilli	o__Bacillales	f__Paenibacillaceae	g__Brevibacillus	s__
seq428	0	0	0	21	20	36	k__Bacteria	p__Proteobacteria	c__Alphaproteobacteria	o__Rhizobiales	f__Phyllobacteriaceae
seq429	0	0	0	0	0	77	k__Bacteria	p__Actinobacteria	c__Actinobacteria	o__Actinomycetales	f__Nocardioidaceae	g__	s__
seq430	23	25	28	0	0	0	k__Bacteria	p__Firmicutes	c__Clostridia	o__Clostridiales	f__Ruminococcaceae
seq431	26	28	22	0	0	0	k__Bacteria	p__Proteobacteria	c__Gammaproteobacteria	o__Alteromonadales	f__125ds10	g__	s__
seq432	12	23	13	10	6	12	k__Bacteria	p__Firmicutes	c__Clostridia	o__Clostridiales	f__Clostridiaceae	g__Clostridium	s__intestinale
seq433	0	0	41	0	28	7	k__Bacteria	p__Proteobacteria	c__Gammaproteobacteria	o__Chromatiales	f__	g__	s__
seq434	0	0	8	16	52	0	k__Bacteria	p__Actinobacteria	c__Actinobacteria	o__Actinomycetales	f__Streptosporangiaceae
seq435	0	0	29	12	9	26	k__Bacteria	p__Firmicutes	c__Clostridia	o__Clostridiales	f__Lachnospiraceae	g__	s__
seq436	0	0	0	28	0	48	k__Bacteria	p__Firmicutes	c__Bacilli	o__Bacillales	f__Alicyclobacillaceae	g__Alicyclobacillus	s__
seq437	32	0	0	31	12	0	k__Bacteria	p__Actinobacteria	c__Actinobacteria	o__Actinomycetales	f__Frankiaceae	g__	s__
seq438	26	0	0	0	26	23	k__Bacteria	p__Proteobacteria	c__Alphaproteobacteria	o__Rhodobacterales	f__Rhodobacteraceae	g__Rubellimicrobium	s__
seq439	0	0	34	0	41	0	k__Bacteria	p__Proteobacteria	c__Betaproteobacteria	o__Burkholderiales	f__Comamonadaceae
seq440	0	0	0	22	22	31	k__Bacteria	p__Firmicutes	c__Bacilli	o__Bacillales	f__Paenibacillaceae	g__Paenibacillus	s__lautus
seq441	37	0	0	37	0	0	k__Bacteria	p__Actinobacteria	c__Actinobacteria	o__Actinomycetales
seq442	0	6	9	17	20	22	k__Bacteria	p__Actinobacteria	c__Actinobacteria	o__Actinomycetales	f__Micrococcaceae	g__	s__
seq443	0	0	39	0	24	11	k__Bacteria	p__Proteobacteria	c__Gammaproteobacteria	o__Alteromonadales	f__Colwelliaceae
seq444	0	0	35	0	39	0	k__Bacteria	p__Actinobacteria	c__Actinobacteria	o__Actinomycetales	f__Pseudonocardiaceae	g__	s__
seq445	0	0	0	20	26	28	k__Bacteria	p__Firmicutes	c__Bacilli	o__Bacillales	f__Bacillaceae
seq446	24	24	25	0	0	0	k__Bacteria	p__Proteobacteria	c__Deltaproteobacteria	o__Syntrophobacterales	f__Syntrophorhabdaceae	g__	s__
seq447	0	0	0	15	34	24	k__Bacteria	p__Bacteroidetes	c__Cytophagia	o__Cytophagales	f__Cytophagaceae	g__Adhaeribacter	s__
seq448	8	25	28	0	0	11	k__Bacteria	p__Proteobacteria	c__Gammaproteobacteria	o__Pseudomonadales	f__Pseudomonadaceae	g__Pseudomonas	s__
seq449	0	20	28	0	0	24	k__Bacteria	p__Proteobacteria	c__Deltaproteobacteria	o__Myxococcales	f__Haliangiaceae	g__	s__
seq450	0	0	44	0	26	2	k__Bacteria	p__Bacteroidetes	c__Cytophagia	o__Cytophagales	f__[Amoebophilaceae]	g__Candidatus Amoebophilus	s__
seq451	0	0	0	32	40	0	k__Bacteria	p__Actinobacteria	c__Actinobacteria	o__Actinomycetales	f__Micromonosporaceae
seq452	0	0	0	18	25	29	k__Bacteria	p__Firmicutes	c__Bacilli	o__Bacillales
seq453	0	0	0	0	72	0	k__Bacteria	p__Actinobacteria	c__Actinobacteria	o__Actinomycetales	f__Geodermatophilaceae
seq454	0	0	0	0	37	35	k__Bacteria	p__Firmicutes	c__Bacilli	o__Bacillales	f__Bacillaceae	g__Bacillus	s__
seq455	30	0	0	41	0	0	k__Bacteria	p__Actinobacteria	c__Actinobacteria	o__Actinomycetales	f__Nocardioidaceae	g__	s__
seq456	12	10	17	10	10	12	k__Bacteria	p__Actinobacteria	c__Actinobacteria	o__Actinomycetales	f__	g__	s__
seq457	0	43	28	0	0	0	k__Bacteria	p__Actinobacteria	c__Actinobacteria	o__Actinomycetales	f__Micromonosporaceae
seq458	0	0	21	0	0	50	k__Bacteria	p__Firmicutes	c__Bacilli	o__Bacillales	f__Bacillaceae	g__Bacillus	s__flexus
seq459	0	0	0	24	30	17	k__Bacteria	p__Firmicutes	c__Bacilli	o__Bacillales	f__Bacillaceae	g__Bacillus	s__
seq460	0	0	0	0	71	0	k__Bacteria	p__Cyanobacteria	c__Chloroplast	o__Streptophyta	f__	g__	s__
seq461	24	0	11	9	5	21	k__Bacteria	p__Actinobacteria	c__Thermoleophilia	o__Gaiellales	f__Gaiellaceae	g__	s__
seq462	38	0	32	0	0	0	k__Bacteria	p__Proteobacteria	c__Alphaproteobacteria	o__Sphingomonadales	f__Sphingomonadaceae	g__Novosphingobium	s__
seq463	12	0	0	0	58	0	k__Bacteria	p__Actinobacteria	c__Actinobacteria	o__Actinomycetales	f__Cellulomonadaceae	g__Cellulomonas	s__
seq464	0	2	35	0	33	0	k__Bacteria	p__Proteobacteria	c__Alphaproteobacteria	o__BD7-3	f__	g__	s__
seq465	0	33	0	37	0	0	k__Bacteria	p__Actinobacteria	c__Actinobacteria	o__Actinomycetales	f__	g__	s__
seq466	16	30	13	0	10	0	k__Bacteria	p__Proteobacteria	c__Alphaproteobacteria	o__Rhodospirillales	f__Rhodospirillaceae	g__Azospirillum	s__
seq467	0	43	11	0	15	0	k__Bacteria	p__Proteobacteria	c__Alphaproteobacteria	o__Rhodospirillales	f__Rhodospirillaceae	g__	s__
seq468	0	21	32	0	16	0	k__Bacteria	p__Acidobacteria	c__[Chloracidobacteria]	o__RB41	f__	g__	s__
seq469	0	0	35	0	34	0	k__Bacteria	p__Proteobacteria	c__Gammaproteobacteria	o__Alteromonadales	f__Colwelliaceae
seq470	0	0	0	13	32	24	k__Bacteria	p__Bacteroidetes	c__[Saprospirae]	o__[Saprospirales]	f__Chitinophagaceae	g__Flavisolibacter	s__
seq471	0	0	0	26	29	14	k__Bacteria	p__Acidobacteria	c__Acidobacteriia	o__Acidobacteriales	f__Koribacteraceae	g__	s__
seq472	27	0	41	0	0	0	k__Bacteria	p__Proteobacteria	c__Betaproteobacteria	o__Rhodocyclales	f__Rhodocyclaceae	g__Dechloromonas	s__
seq473	0	68	0	0	0	0	k__Bacteria	p__Acidobacteria	c__Acidobacteriia	o__Acidobacteriales	f__Koribacteraceae	g__Candidatus Koribacter	s__
seq474	0	23	22	0	23	0	k__Bacteria	p__Actinobacteria	c__Actinobacteria	o__Actinomycetales	f__Streptomycetaceae
seq475	0	0	0	30	0	38	k__Bacteria	p__Actinobacteria	c__Actinobacteria	o__Actinomycetales	f__Cellulomonadaceae	g__Actinotalea	s__
seq476	28	15	10	14	0	0	k__Bacteria	p__Acidobacteria	c__Acidobacteria-5	o__	f__	g__	s__
seq477	15	33	19	0	0	0	k__Bacteria	p__Proteobacteria	c__Alphaproteobacteria	o__Rhodobacterales	f__Rhodobacteraceae	g__Rhodobacter	s__
seq478	30	0	37	0	0	0	k__Bacteria	p__Actinobacteria	c__Thermoleophilia	o__	f__	g__	s__
seq479	5	9	13	12	14	14	k__Bacteria	p__Proteobacteria	c__Gammaproteobacteria	o__Pseudomonadales	f__Pseudomonadaceae
seq480	45	0	0	22	0	0	k__Bacteria	p__Acidobacteria	c__Acidobacteria-5	o__	f__	g__	s__
seq481	0	0	0	19	27	21	k__Bacteria	p__Actinobacteria	c__Actinobacteria	o__Actinomycetales	f__Corynebacteriaceae	g__Corynebacterium	s__
seq482	0	0	0	8	26	33	k__Bacteria	p__Actinobacteria	c__Actinobacteria	o__Actinomycetales	f__Corynebacteriaceae	g__Corynebacterium	s__
seq483	0	0	0	17	50	0	k__Bacteria	p__Actinobacteria	c__Actinobacteria	o__Actinomycetales	f__Microbacteriaceae	g__Microbacterium	s__
seq484	0	0	0	13	41	13	k__Bacteria	p__Firmicutes	c__Bacilli	o__Bacillales	f__Bacillaceae
seq485	0	0	0	0	34	33	k__Bacteria	p__Firmicutes	c__Bacilli	o__Bacillales	f__Bacillaceae	g__Bacillus
seq486	0	0	0	0	30	37	k__Bacteria	p__Actinobacteria	c__Actinobacteria	o__Actinomycetales	f__Sporichthyaceae	g__	s__
seq487	40	0	0	26	0	0	k__Bacteria	p__Proteobacteria	c__Gammaproteobacteria	o__Xanthomonadales	f__Xanthomonadaceae	g__	s__
seq488	8	0	0	20	18	20	k__Bacteria	p__Proteobacteria	c__Alphaproteobacteria
seq489	16	0	27	0	0	23	k__Bacteria	p__Proteobacteria	c__Alphaproteobacteria	o__Rhizobiales	f__Hyphomicrobiaceae	g__Rhodoplanes	s__
seq490	0	66	0	0	0	0	k__Bacteria	p__Proteobacteria	c__Deltaproteobacteria	o__Syntrophobacterales	f__Syntrophobacteraceae	g__	s__
seq491	0	0	0	24	20	22	k__Bacteria	p__Firmicutes	c__Bacilli	o__Bacillales	f__Bacillaceae	g__Bacillus	s__
seq492	0	0	0	17	21	28	k__Bacteria	p__Firmicutes	c__Clostridia	o__Clostridiales	f__Clostridiaceae	g__	s__
seq493	20	18	13	14	0	0	k__Bacteria	p__Acidobacteria	c__Acidobacteriia	o__Acidobacteriales	f__Koribacteraceae
seq494	20	0	13	3	0	29	k__Bacteria	p__Firmicutes	c__Clostridia	o__Clostridiales	f__Clostridiaceae	g__Clostridium	s__butyricum
seq495	41	0	24	0	0	0	k__Bacteria	p__Proteobacteria	c__Alphaproteobacteria	o__Rhizobiales	f__Hyphomicrobiaceae	g__Rhodoplanes	s__
seq496	0	51	0	0	14	0	k__Bacteria	p__Acidobacteria	c__Acidobacteriia	o__Acidobacteriales	f__Koribacteraceae	g__	s__
seq497	0	0	37	0	28	0	k__Bacteria	p__Proteobacteria	c__Alphaproteobacteria	o__Rhizobiales	f__Cohaesibacteraceae	g__Cohaesibacter	s__
seq498	0	0	39	0	22	4	k__Bacteria	p__Proteobacteria	c__Gammaproteobacteria	o__Alteromonadales	f__	g__	s__
seq499	0	0	0	22	16	27	k__Bacteria	p__Firmicutes	c__Bacilli	o__Bacillales	f__Bacillaceae
seq500	0	0	0	36	29	0	k__Bacteria	p__Firmicutes	c__Bacilli	o__Bacillales	f__	g__	s__
seq501	0	0	0	16	20	29	k__Bacteria	p__Proteobacteria	c__Alphaproteobacteria	o__Rhodospirillales	f__Acetobacteraceae	g__	s__
seq502	0	0	0	0	65	0	k__Bacteria	p__Cyanobacteria	c__Chloroplast	o__Streptophyta	f__	g__	s__
seq503	31	0	0	33	0	0	k__Bacteria	p__Proteobacteria	c__Betaproteobacteria	o__Burkholderiales	f__Alcaligenaceae
seq504	39	25	0	0	0	0	k__Bacteria	p__Proteobacteria	c__Deltaproteobacteria	o__Myxococcales	f__	g__	s__
seq505	42	0	0	22	0	0	k__Bacteria	p__AD3	c__ABS-6	o__	f__	g__	s__
seq506	0	53	7	0	4	0	k__Bacteria	p__Gemmatimonadetes	c__Gemm-1	o__	f__	g__	s__
seq507	0	0	8	16	14	26	k__Bacteria	p__Actinobacteria	c__Actinobacteria	o__Actinomycetales	f__Pseudonocardiaceae	g__Prauserella	s__rugosa
seq508	0	0	0	17	21	26	k__Bacteria	p__Proteobacteria	c__Alphaproteobacteria	o__Rhodospirillales	f__Rhodospirillaceae	g__Skermanella	s__xinjiangensis
seq509	0	0	0	17	29	18	k__Bacteria	p__Proteobacteria	c__Betaproteobacteria	o__Burkholderiales	f__Oxalobacteraceae	g__Cupriavidus	s__
seq510	0	0	0	0	30	34	k__Bacteria	p__Actinobacteria	c__Actinobacteria	o__Actinomycetales	f__Nocardioidaceae
seq511	0	0	0	0	0	64	k__Bacteria	p__Proteobacteria	c__Deltaproteobacteria	o__Spirobacillales	f__	g__	s__
seq512	0	0	0	0	0	64	k__Bacteria	p__Firmicutes	c__Bacilli	o__Bacillales	f__Alicyclobacillaceae	g__Alicyclobacillus	s__
seq513	0	0	0	0	0	64	k__Bacteria	p__Firmicutes	c__Bacilli	o__Bacillales	f__Alicyclobacillaceae	g__Alicyclobacillus	s__
seq514	17	30	16	0	0	0	k__Bacteria	p__Bacteroidetes	c__Bacteroidia	o__Bacteroidales	f__	g__	s__
seq515	11	26	26	0	0	0	k__Bacteria	p__Proteobacteria	c__Deltaproteobacteria	o__GW-28	f__	g__	s__
seq516	0	47	16	0	0	0	k__Bacteria	p__Acidobacteria	c__Acidobacteriia	o__Acidobacteriales	f__Koribacteraceae	g__	s__
seq517	0	4	0	11	30	18	k__Bacteria	p__Bacteroidetes	c__Cytophagia	o__Cytophagales	f__Cytophagaceae	g__Pontibacter	s__
seq518	0	0	32	0	17	14	k__Bacteria	p__Bacteroidetes	c__Flavobacteriia	o__Flavobacteriales	f__	g__	s__
seq519	0	0	0	63	0	0	k__Bacteria	p__Firmicutes	c__Bacilli	o__Bacillales	f__Bacillaceae	g__Bacillus
seq520	0	0	0	15	39	9	k__Bacteria	p__Actinobacteria	c__Actinobacteria	o__Actinomycetales	f__Micrococcaceae
seq521	19	21	22	0	0	0	k__Bacteria	p__Proteobacteria	c__Gammaproteobacteria	o__HOC36	f__	g__	s__
seq522	19	9	12	22	0	0	k__Bacteria	p__Actinobacteria	c__Actinobacteria	o__Actinomycetales	f__Nocardioidaceae	g__Nocardioides	s__
seq523	6	0	0	13	21	22	k__Bacteria	p__Proteobacteria	c__Alphaproteobacteria	o__Sphingomonadales	f__Sphingomonadaceae	g__	s__
seq524	18	20	24	0	0	0	k__Bacteria	p__Proteobacteria	c__Gammaproteobacteria	o__Pseudomonadales	f__Pseudomonadaceae
seq525	10	0	0	13	26	13	k__Bacteria	p__Proteobacteria	c__Gammaproteobacteria	o__Xanthomonadales	f__Xanthomonadaceae	g__Stenotrophomonas	s__acidaminiphila
seq526	12	21	29	0	0	0	k__Bacteria	p__Proteobacteria	c__Betaproteobacteria	o__Rhodocyclales	f__Rhodocyclaceae	g__Dechloromonas	s__
seq527	0	22	23	0	17	0	k__Bacteria	p__Actinobacteria	c__Actinobacteria	o__Actinomycetales
seq528	0	21	25	16	0	0	k__Bacteria	p__Proteobacteria	c__Alphaproteobacteria	o__Sphingomonadales	f__Sphingomonadaceae	g__Kaistobacter	s__
seq529	0	15	19	0	28	0	k__Bacteria	p__Proteobacteria	c__Alphaproteobacteria	o__Rhizobiales	f__Hyphomicrobiaceae	g__Rhodoplanes	s__
seq530	0	0	7	12	21	22	k__Bacteria	p__Proteobacteria	c__Betaproteobacteria	o__Burkholderiales	f__Alcaligenaceae	g__Achromobacter	s__
seq531	0	0	0	25	13	24	k__Bacteria	p__Actinobacteria	c__Actinobacteria	o__Actinomycetales
seq532	15	22	18	0	0	6	k__Bacteria	p__Firmicutes	c__Clostridia	o__Clostridiales	f__Ruminococcaceae
seq533	6	6	10	9	13	17	k__Bacteria	p__Proteobacteria	c__Alphaproteobacteria	o__Sphingomonadales	f__Sphingomonadaceae	g__	s__
seq534	0	31	17	0	13	0	k__Bacteria	p__Acidobacteria	c__DA052	o__Ellin6513	f__	g__	s__
seq535	0	16	0	14	6	25	k__Bacteria	p__Proteobacteria	c__Alphaproteobacteria	o__Sphingomonadales	f__Erythrobacteraceae	g__	s__
seq536	0	0	0	14	25	22	k__Bacteria	p__Proteobacteria	c__Betaproteobacteria	o__Methylophilales	f__Methylophilaceae
seq537	25	0	0	35	0	0	k__Bacteria	p__Actinobacteria	c__Actinobacteria	o__Actinomycetales	f__Streptomycetaceae	g__Streptomyces
seq538	20	0	0	40	0	0	k__Bacteria	p__Proteobacteria	c__Alphaproteobacteria	o__Rhodospirillales	f__Rhodospirillaceae	g__	s__
seq539	9	0	23	4	7	17	k__Bacteria	p__Proteobacteria	c__Alphaproteobacteria	o__Rhizobiales	f__Hyphomicrobiaceae	g__	s__
seq540	0	9	18	0	15	18	k__Bacteria	p__Proteobacteria	c__Alphaproteobacteria	o__Rhizobiales	f__Hyphomicrobiaceae	g__Devosia	s__
seq541	0	8	0	0	27	25	k__Bacteria	p__Proteobacteria	c__Alphaproteobacteria	o__Rhodobacterales	f__Rhodobacteraceae	g__Rubellimicrobium	s__
seq542	0	18	0	9	21	12	k__Bacteria	p__Proteobacteria	c__Betaproteobacteria	o__Burkholderiales	f__Oxalobacteraceae	g__	s__
seq543	0	0	0	19	22	19	k__Bacteria	p__Proteobacteria	c__Alphaproteobacteria	o__Sphingomonadales	f__Sphingomonadaceae	g__	s__
seq544	0	0	0	17	43	0	k__Bacteria	p__Actinobacteria	c__Actinobacteria	o__Actinomycetales	f__Kineosporiaceae	g__	s__
seq545	0	0	0	38	0	22	k__Bacteria	p__Firmicutes	c__Bacilli	o__Bacillales	f__Planococcaceae
seq546	0	0	0	60	0	0	k__Bacteria	p__Actinobacteria	c__Actinobacteria	o__Actinomycetales	f__Geodermatophilaceae	g__Geodermatophilus	s__
seq547	0	0	0	16	26	18	k__Bacteria	p__Proteobacteria	c__Alphaproteobacteria	o__Rhizobiales	f__Bradyrhizobiaceae	g__	s__
seq548	18	22	19	0	0	0	k__Bacteria	p__Actinobacteria	c__Actinobacteria	o__Actinomycetales	f__	g__	s__
seq549	13	17	29	0	0	0	k__Bacteria	p__Proteobacteria	c__Alphaproteobacteria	o__Rhodobacterales	f__Rhodobacteraceae
seq550	17	25	17	0	0	0	k__Bacteria	p__Proteobacteria	c__Deltaproteobacteria	o__GW-28	f__	g__	s__
seq551	16	16	27	0	0	0	k__Bacteria	p__Proteobacteria	c__Deltaproteobacteria	o__Syntrophobacterales	f__Syntrophaceae	g__Syntrophus	s__
seq552	22	0	37	0	0	0	k__Bacteria	p__Acidobacteria	c__Acidobacteriia	o__Acidobacteriales	f__Koribacteraceae	g__	s__
seq553	0	3	0	0	33	23	k__Bacteria	p__Proteobacteria	c__Alphaproteobacteria	o__Rhodospirillales	f__Rhodospirillaceae	g__Skermanella	s__
seq554	0	0	37	0	22	0	k__Bacteria	p__Bacteroidetes	c__Bacteroidia	o__Bacteroidales	f__Porphyromonadaceae	g__Dysgonomonas	s__
seq555	0	0	27	0	0	32	k__Bacteria	p__Actinobacteria	c__Actinobacteria	o__Actinomycetales	f__Streptomycetaceae	g__Streptomyces	s__
seq556	0	0	0	18	17	24	k__Bacteria	p__Proteobacteria	c__Alphaproteobacteria	o__Rhizobiales	f__Rhizobiaceae
seq557	0	0	0	17	15	27	k__Bacteria	p__Proteobacteria	c__Gammaproteobacteria	o__Pseudomonadales	f__Pseudomonadaceae
seq558	0	0	0	0	31	28	k__Bacteria	p__Proteobacteria	c__Deltaproteobacteria	o__Myxococcales	f__Myxococcaceae	g__Myxococcus	s__
seq559	0	0	0	0	21	38	k__Bacteria	p__Firmicutes	c__Bacilli	o__Bacillales
seq560	15	19	24	0	0	0	k__Bacteria	p__Proteobacteria	c__Deltaproteobacteria	o__Myxococcales	f__Myxococcaceae	g__Anaeromyxobacter	s__
seq561	19	26	0	13	0	0	k__Bacteria	p__Acidobacteria	c__Acidobacteriia	o__Acidobacteriales	f__Koribacteraceae	g__	s__
seq562	13	19	26	0	0	0	k__Bacteria	p__Actinobacteria	c__OPB41	o__	f__	g__	s__
seq563	0	58	0	0	0	0	k__Bacteria	p__Actinobacteria	c__Thermoleophilia	o__Gaiellales	f__	g__	s__
seq564	0	30	28	0	0	0	k__Bacteria	p__Actinobacteria	c__Acidimicrobiia	o__Acidimicrobiales	f__koll13	g__	s__
seq565	0	0	16	10	32	0	k__Bacteria	p__Actinobacteria	c__Actinobacteria	o__Actinomycetales	f__Nocardioidaceae	g__Nocardioides	s__
seq566	0	0	0	34	0	24	k__Bacteria	p__Firmicutes	c__Bacilli	o__Lactobacillales	f__Aerococcaceae	g__Atopococcus	s__tabaci
seq567	0	0	0	21	13	24	k__Bacteria	p__Actinobacteria	c__Actinobacteria	o__Actinomycetales	f__Cellulomonadaceae	g__Cellulomonas	s__
seq568	5	0	0	15	13	24	k__Bacteria	p__Firmicutes	c__Clostridia	o__Clostridiales	f__Ruminococcaceae
seq569	0	57	0	0	0	0	k__Bacteria	p__Acidobacteria	c__Acidobacteriia	o__Acidobacteriales	f__Koribacteraceae	g__Candidatus Koribacter	s__
seq570	0	30	8	0	19	0	k__Bacteria	p__Actinobacteria	c__MB-A2-108	o__0319-7L14	f__	g__	s__
seq571	0	0	0	22	24	11	k__Bacteria	p__Firmicutes	c__Bacilli	o__Bacillales	f__Bacillaceae
seq572	0	0	0	27	0	30	k__Bacteria	p__Actinobacteria	c__Actinobacteria	o__Actinomycetales	f__Intrasporangiaceae	g__	s__
seq573	0	0	0	9	29	19	k__Bacteria	p__Actinobacteria	c__Actinobacteria	o__Actinomycetales	f__Bogoriellaceae	g__Georgenia	s__
seq574	0	0	0	0	57	0	k__Bacteria	p__Cyanobacteria	c__Chloroplast	o__Streptophyta	f__	g__	s__
seq575	0	0	0	0	0	57	k__Bacteria	p__Acidobacteria	c__Acidobacteriia	o__Acidobacteriales	f__Koribacteraceae	g__	s__
seq576	0	0	0	0	0	57	k__Bacteria	p__Actinobacteria	c__Actinobacteria	o__Actinomycetales	f__Microbacteriaceae	g__Microbacterium	s__
seq577	18	25	13	0	0	0	k__Bacteria	p__Firmicutes	c__Clostridia	o__Clostridiales	f__Clostridiaceae	g__Clostridium	s__
seq578	27	19	10	0	0	0	k__Bacteria	p__Proteobacteria	c__Deltaproteobacteria	o__Desulfovibrionales	f__Desulfomicrobiaceae	g__Desulfomicrobium	s__
seq579	14	19	0	0	23	0	k__Bacteria	p__Chloroflexi	c__Ellin6529	o__	f__	g__	s__
seq580	6	0	11	0	21	18	k__Bacteria	p__Proteobacteria	c__Alphaproteobacteria	o__Rhizobiales
seq581	7	0	0	14	20	15	k__Bacteria	p__Actinobacteria	c__Actinobacteria	o__Actinomycetales	f__Streptomycetaceae
seq582	12	12	12	0	20	0	k__Bacteria	p__Firmicutes	c__Bacilli	o__Bacillales	f__Bacillaceae	g__Bacillus	s__cereus
seq583	17	0	0	0	18	21	k__Bacteria	p__Firmicutes	c__Clostridia	o__Clostridiales	f__Lachnospiraceae	g__	s__
seq584	11	21	24	0	0	0	k__Bacteria	p__Bacteroidetes	c__Bacteroidia	o__Bacteroidales	f__	g__	s__
seq585	0	56	0	0	0	0	k__Bacteria	p__Proteobacteria	c__Alphaproteobacteria	o__Rhodospirillales	f__	g__	s__
seq586	0	32	10	0	4	10	k__Bacteria	p__Proteobacteria	c__Alphaproteobacteria	o__Rickettsiales	f__Rickettsiaceae	g__	s__
seq587	0	56	0	0	0	0	k__Bacteria	p__Proteobacteria	c__Deltaproteobacteria	o__Myxococcales	f__Myxococcaceae	g__	s__
seq588	0	32	24	0	0	0	k__Bacteria	p__Acidobacteria	c__Solibacteres	o__Solibacterales	f__	g__	s__
seq589	0	4	26	0	18	8	k__Bacteria
seq590	0	4	0	0	0	52	k__Bacteria	p__Chloroflexi	c__Anaerolineae	o__A31	f__	g__	s__
seq591	0	0	0	18	0	38	k__Bacteria	p__Firmicutes	c__Bacilli	o__Bacillales	f__Bacillaceae	g__Oceanobacillus
seq592	0	0	0	15	20	21	k__Bacteria	p__Actinobacteria	c__Actinobacteria	o__Actinomycetales	f__Pseudonocardiaceae	g__Pseudonocardia	s__
seq593	0	0	0	33	23	0	k__Bacteria	p__[Thermi]	c__Deinococci	o__Deinococcales	f__Trueperaceae	g__B-42	s__
seq594	0	0	0	0	19	37	k__Bacteria	p__Firmicutes	c__Bacilli	o__Bacillales	f__Bacillaceae
seq595	18	19	18	0	0	0	k__Bacteria	p__Firmicutes
seq596	17	8	10	12	8	0	k__Bacteria	p__Acidobacteria	c__Acidobacteriia	o__Acidobacteriales	f__Acidobacteriaceae	g__Edaphobacter	s__modestum
seq597	9	7	13	5	14	7	k__Bacteria	p__Bacteroidetes	c__Cytophagia	o__Cytophagales	f__Cytophagaceae
seq598	9	16	0	0	0	30	k__Bacteria	p__Proteobacteria	c__Alphaproteobacteria	o__Rhizobiales	f__Hyphomicrobiaceae	g__	s__
seq599	13	21	21	0	0	0	k__Bacteria	p__Proteobacteria	c__Deltaproteobacteria	o__Desulfobacterales	f__Desulfobacteraceae	g__Desulfococcus	s__
seq600	6	8	16	12	13	0	k__Bacteria	p__Proteobacteria	c__Alphaproteobacteria	o__Rhodospirillales	f__Rhodospirillaceae	g__	s__
seq601	15	21	19	0	0	0	k__Bacteria	p__Acidobacteria	c__Acidobacteria-6	o__iii1-15	f__	g__	s__
seq602	10	17	0	8	0	20	k__Bacteria	p__Firmicutes	c__Bacilli	o__Bacillales	f__Bacillaceae	g__Bacillus	s__flexus
seq603	0	30	11	6	8	0	k__Bacteria	p__Proteobacteria	c__Betaproteobacteria	o__MND1	f__	g__	s__
seq604	0	15	14	12	14	0	k__Bacteria	p__Actinobacteria	c__Actinobacteria	o__Actinomycetales	f__Micrococcaceae
seq605	0	0	0	15	20	20	k__Bacteria	p__Actinobacteria	c__Actinobacteria	o__Actinomycetales	f__Dermacoccaceae	g__Dermacoccus	s__
seq606	0	0	0	0	55	0	k__Bacteria	p__Actinobacteria	c__Thermoleophilia	o__Gaiellales	f__Gaiellaceae	g__	s__
seq607	0	0	0	0	24	31	k__Bacteria	p__Actinobacteria	c__Actinobacteria	o__Actinomycetales	f__Streptomycetaceae
seq608	0	0	0	0	55	0	k__Bacteria	p__Cyanobacteria	c__Chloroplast	o__Streptophyta	f__	g__	s__
seq609	19	18	17	0	0	0	k__Bacteria	p__Acidobacteria	c__Holophagae	o__Holophagales	f__Holophagaceae	g__	s__
seq610	0	27	27	0	0	0	k__Bacteria	p__Firmicutes	c__Clostridia	o__Clostridiales	f__Clostridiaceae
seq611	0	15	22	0	17	0	k__Bacteria	p__Actinobacteria	c__MB-A2-108	o__0319-7L14	f__	g__	s__
seq612	0	0	23	0	31	0	k__Bacteria	p__Proteobacteria	c__Alphaproteobacteria	o__Rickettsiales	f__Rickettsiaceae	g__	s__
seq613	0	0	20	0	29	5	k__Bacteria	p__Proteobacteria	c__Alphaproteobacteria	o__Rhodobacterales	f__Hyphomonadaceae	g__Maricaulis	s__
seq614	0	0	0	20	16	18	k__Bacteria	p__Proteobacteria	c__Betaproteobacteria	o__Burkholderiales	f__Comamonadaceae
seq615	0	0	0	21	17	16	k__Bacteria	p__Chloroflexi	c__Chloroflexi	o__Herpetosiphonales	f__	g__	s__
seq616	12	15	19	0	0	7	k__Bacteria	p__Proteobacteria	c__Betaproteobacteria	o__Burkholderiales	f__Comamonadaceae	g__Diaphorobacter	s__
seq617	14	19	20	0	0	0	k__Bacteria	p__Proteobacteria	c__Alphaproteobacteria	o__Rhodospirillales	f__Acetobacteraceae	g__	s__
seq618	6	10	10	13	0	14	k__Bacteria	p__Firmicutes	c__Clostridia	o__Clostridiales	f__[Mogibacteriaceae]	g__Anaerovorax	s__
seq619	26	0	0	27	0	0	k__Bacteria	p__Proteobacteria	c__Alphaproteobacteria	o__Rhodospirillales	f__Rhodospirillaceae	g__	s__
seq620	0	15	0	17	0	21	k__Bacteria	p__Proteobacteria	c__Alphaproteobacteria	o__Rhodospirillales	f__Rhodospirillaceae	g__Azospirillum	s__
seq621	0	0	14	0	10	29	k__Bacteria	p__Chlorobi	c__OPB56	o__	f__	g__	s__
seq622	0	0	0	31	22	0	k__Bacteria	p__Cyanobacteria	c__Chloroplast	o__Streptophyta	f__	g__	s__
seq623	0	0	0	22	0	31	k__Bacteria	p__Firmicutes	c__Bacilli	o__Bacillales	f__Bacillaceae	g__Bacillus	s__
seq624	0	0	0	14	16	23	k__Bacteria	p__Firmicutes	c__Bacilli	o__Bacillales	f__Planococcaceae	g__Sporosarcina	s__ginsengi
seq625	21	0	31	0	0	0	k__Bacteria	p__Proteobacteria	c__Deltaproteobacteria	o__Syntrophobacterales	f__Syntrophaceae	g__Syntrophus	s__
seq626	52	0	0	0	0	0	k__Bacteria	p__Proteobacteria	c__Gammaproteobacteria	o__Xanthomonadales	f__Xanthomonadaceae	g__	s__
seq627	11	0	14	7	9	11	k__Bacteria	p__Actinobacteria	c__Actinobacteria	o__Actinomycetales	f__Nocardioidaceae	g__	s__
seq628	0	12	0	40	0	0	k__Bacteria	p__Actinobacteria	c__Thermoleophilia	o__Gaiellales	f__Gaiellaceae	g__	s__
seq629	0	0	52	0	0	0	k__Bacteria	p__Actinobacteria	c__Actinobacteria	o__Actinomycetales
seq630	0	0	17	0	17	18	k__Bacteria	p__Proteobacteria	c__Alphaproteobacteria	o__Rhizobiales	f__Hyphomicrobiaceae	g__Devosia	s__
seq631	0	0	20	0	0	32	k__Bacteria	p__Proteobacteria	c__Deltaproteobacteria	o__Myxococcales
seq632	0	0	0	14	21	17	k__Bacteria	p__Proteobacteria	c__Betaproteobacteria	o__Burkholderiales	f__Comamonadaceae
seq633	0	0	0	0	31	21	k__Bacteria	p__Actinobacteria	c__Actinobacteria	o__Actinomycetales	f__Microbacteriaceae	g__Microbacterium	s__
seq634	0	0	0	0	0	52	k__Bacteria	p__Firmicutes	c__Clostridia	o__Clostridiales	f__Clostridiaceae	g__Clostridium	s__ljungdahlii
seq635	0	0	0	0	0	52	k__Bacteria	p__Proteobacteria	c__Alphaproteobacteria	o__Rhizobiales	f__Hyphomicrobiaceae	g__Rhodoplanes	s__
seq636	13	18	20	0	0	0	k__Bacteria	p__Acidobacteria	c__Acidobacteriia	o__Acidobacteriales	f__Koribacteraceae	g__Candidatus Koribacter	s__
seq637	0	0	51	0	0	0	k__Archaea	p__Euryarchaeota	c__Methanomicrobia	o__Methanosarcinales	f__Methanosaetaceae	g__Methanosaeta	s__
seq638	0	0	0	16	15	20	k__Bacteria	p__Bacteroidetes	c__Sphingobacteriia	o__Sphingobacteriales	f__Sphingobacteriaceae	g__Parapedobacter	s__
seq639	0	0	0	29	22	0	k__Bacteria	p__Firmicutes	c__Bacilli	o__Bacillales	f__Paenibacillaceae	g__Paenibacillus	s__
seq640	0	0	0	16	16	19	k__Bacteria	p__Actinobacteria	c__Actinobacteria	o__Actinomycetales	f__Nocardioidaceae
seq641	0	0	0	8	16	27	k__Bacteria	p__Firmicutes	c__Bacilli	o__Bacillales	f__Bacillaceae	g__Bacillus	s__
seq642	0	0	0	51	0	0	k__Bacteria	p__Actinobacteria	c__Actinobacteria	o__Actinomycetales	f__Nocardioidaceae	g__	s__
seq643	0	0	0	0	33	18	k__Bacteria	p__Actinobacteria	c__Actinobacteria	o__Actinomycetales	f__Pseudonocardiaceae	g__Saccharomonospora	s__
seq644	14	6	10	0	10	10	k__Bacteria	p__Proteobacteria	c__Alphaproteobacteria	o__Sphingomonadales	f__Sphingomonadaceae	g__Sphingomonas	s__wittichii
seq645	23	0	0	0	27	0	k__Bacteria	p__Actinobacteria	c__Thermoleophilia	o__Gaiellales	f__Gaiellaceae	g__	s__
seq646	17	0	33	0	0	0	k__Bacteria	p__Actinobacteria	c__Actinobacteria	o__Actinomycetales	f__Microbacteriaceae	g__Leucobacter	s__
seq647	28	0	0	22	0	0	k__Bacteria	p__Proteobacteria	c__Deltaproteobacteria	o__Syntrophobacterales	f__Syntrophobacteraceae	g__	s__
seq648	0	50	0	0	0	0	k__Bacteria	p__Actinobacteria	c__Actinobacteria	o__Actinomycetales	f__Pseudonocardiaceae	g__	s__
seq649	0	18	4	8	7	13	k__Bacteria	p__Proteobacteria	c__Alphaproteobacteria	o__Rhodospirillales	f__Rhodospirillaceae	g__	s__
seq650	0	0	28	0	22	0	k__Bacteria	p__Proteobacteria	c__Alphaproteobacteria	o__Rickettsiales	f__	g__	s__
seq651	0	0	27	0	23	0	k__Bacteria	p__Actinobacteria	c__Thermoleophilia	o__Gaiellales	f__Gaiellaceae	g__	s__
seq652	0	0	0	50	0	0	k__Bacteria	p__Firmicutes	c__Bacilli	o__Bacillales	f__Paenibacillaceae	g__	s__
seq653	0	0	0	11	18	21	k__Bacteria	p__Actinobacteria	c__Actinobacteria	o__Actinomycetales	f__	g__	s__
seq654	0	0	0	8	22	20	k__Bacteria	p__Bacteroidetes	c__Cytophagia	o__Cytophagales	f__Cytophagaceae	g__Adhaeribacter	s__
seq655	0	0	0	17	17	16	k__Bacteria	p__Proteobacteria	c__Alphaproteobacteria	o__Rhizobiales	f__Bradyrhizobiaceae
seq656	0	0	0	0	50	0	k__Bacteria	p__Firmicutes	c__Bacilli	o__Bacillales	f__Bacillaceae	g__Bacillus
seq657	0	0	0	0	17	33	k__Bacteria	p__Proteobacteria	c__Gammaproteobacteria	o__Alteromonadales	f__Alteromonadaceae	g__Marinobacter	s__
seq658	0	0	0	0	0	50	k__Bacteria	p__Proteobacteria	c__Betaproteobacteria
seq659	0	0	0	0	0	50	k__Bacteria	p__Firmicutes	c__Clostridia	o__Clostridiales	f__Ruminococcaceae	g__	s__
seq660	0	0	0	0	0	50	k__Bacteria	p__Firmicutes	c__Bacilli	o__Bacillales	f__Paenibacillaceae	g__	s__
seq661	17	0	0	32	0	0	k__Bacteria	p__Acidobacteria	c__Acidobacteriia	o__Acidobacteriales	f__Koribacteraceae	g__Candidatus Koribacter	s__
seq662	7	0	5	0	0	37	k__Bacteria	p__Proteobacteria	c__Gammaproteobacteria
seq663	18	0	0	0	0	31	k__Bacteria	p__Actinobacteria	c__Actinobacteria	o__Actinomycetales	f__Streptosporangiaceae	g__Nonomuraea	s__
seq664	13	19	17	0	0	0	k__Bacteria	p__Proteobacteria	c__Gammaproteobacteria	o__HOC36	f__	g__	s__
seq665	33	16	0	0	0	0	k__Bacteria	p__Actinobacteria	c__Thermoleophilia	o__Gaiellales	f__Gaiellaceae	g__	s__
seq666	0	23	26	0	0	0	k__Bacteria	p__Proteobacteria	c__Deltaproteobacteria	o__Syntrophobacterales	f__Syntrophorhabdaceae	g__	s__
seq667	0	24	25	0	0	0	k__Bacteria	p__Synergistetes	c__Synergistia	o__Synergistales	f__TTA_B6	g__E6	s__
seq668	0	8	14	11	0	16	k__Bacteria	p__Proteobacteria	c__Betaproteobacteria	o__Burkholderiales	f__Comamonadaceae
seq669	0	8	0	15	17	9	k__Bacteria	p__Proteobacteria	c__Alphaproteobacteria	o__Rhizobiales	f__Rhizobiaceae	g__Agrobacterium	s__
seq670	0	0	36	0	13	0	k__Archaea	p__Euryarchaeota	c__Methanobacteria	o__Methanobacteriales	f__Methanobacteriaceae	g__Methanobrevibacter	s__
seq671	0	0	0	17	0	32	k__Bacteria	p__Actinobacteria	c__Acidimicrobiia	o__Acidimicrobiales	f__	g__	s__
seq672	0	0	0	0	9	40	k__Bacteria	p__Actinobacteria	c__Acidimicrobiia	o__Acidimicrobiales	f__	g__	s__
seq673	0	0	0	0	0	49	k__Bacteria	p__Actinobacteria	c__Thermoleophilia	o__Solirubrobacterales	f__	g__	s__
seq674	24	0	0	24	0	0	k__Bacteria	p__Actinobacteria	c__Actinobacteria	o__Actinomycetales	f__	g__	s__
seq675	14	0	0	22	12	0	k__Bacteria	p__Acidobacteria	c__Acidobacteriia	o__Acidobacteriales	f__Koribacteraceae	g__	s__
seq676	17	19	0	0	7	5	k__Bacteria	p__Proteobacteria	c__Alphaproteobacteria	o__Rhodospirillales	f__Rhodospirillaceae	g__	s__
seq677	23	12	4	9	0	0	k__Bacteria	p__Acidobacteria	c__Acidobacteriia	o__Acidobacteriales	f__Koribacteraceae
seq678	48	0	0	0	0	0	k__Bacteria	p__Actinobacteria	c__Actinobacteria	o__Actinomycetales
seq679	12	18	18	0	0	0	k__Bacteria	p__Actinobacteria	c__Actinobacteria	o__Actinomycetales	f__	g__	s__
seq680	9	15	11	0	8	5	k__Bacteria	p__Proteobacteria	c__Alphaproteobacteria	o__Rhizobiales	f__Rhizobiaceae	g__Agrobacterium	s__
seq681	32	0	0	16	0	0	k__Bacteria	p__Actinobacteria	c__Thermoleophilia	o__Gaiellales	f__Gaiellaceae	g__	s__
seq682	0	24	0	24	0	0	k__Bacteria	p__Actinobacteria	c__Thermoleophilia	o__Gaiellales	f__Gaiellaceae	g__	s__
seq683	0	0	7	0	41	0	k__Bacteria	p__Proteobacteria	c__Deltaproteobacteria	o__Myxococcales
seq684	0	0	0	48	0	0	k__Bacteria	p__Proteobacteria	c__Alphaproteobacteria	o__Rhizobiales	f__Hyphomicrobiaceae	g__Rhodoplanes	s__
seq685	0	0	0	6	20	22	k__Bacteria	p__Proteobacteria	c__Alphaproteobacteria	o__Rhizobiales	f__Bradyrhizobiaceae
seq686	0	0	0	17	18	13	k__Bacteria	p__Firmicutes	c__Bacilli	o__Bacillales	f__Bacillaceae	g__Bacillus	s__
seq687	0	0	0	28	20	0	k__Bacteria	p__Proteobacteria	c__Betaproteobacteria	o__Burkholderiales	f__Oxalobacteraceae	g__	s__
seq688	0	0	0	9	30	9	k__Bacteria	p__Proteobacteria	c__Alphaproteobacteria
seq689	0	0	0	8	10	30	k__Bacteria	p__Actinobacteria	c__Actinobacteria	o__Actinomycetales	f__Corynebacteriaceae	g__Corynebacterium
seq690	0	0	0	15	0	33	k__Bacteria	p__Firmicutes	c__Bacilli	o__Bacillales
seq691	0	0	0	0	48	0	k__Bacteria	p__Actinobacteria	c__Actinobacteria	o__Actinomycetales	f__Microbacteriaceae	g__Salinibacterium	s__
seq692	0	0	0	0	48	0	k__Bacteria	p__Firmicutes	c__Bacilli	o__Bacillales	f__Bacillaceae
seq693	0	0	0	0	0	48	k__Bacteria	p__Proteobacteria	c__Deltaproteobacteria	o__Myxococcales	f__Myxococcaceae	g__Anaeromyxobacter	s__
seq694	0	0	0	0	0	48	k__Bacteria	p__Actinobacteria	c__Rubrobacteria	o__Rubrobacterales	f__Rubrobacteraceae	g__Rubrobacter	s__
seq695	0	0	0	0	0	48	k__Bacteria	p__Actinobacteria	c__Thermoleophilia	o__Gaiellales	f__Gaiellaceae	g__	s__
seq696	0	0	0	0	0	48	k__Bacteria	p__Gemmatimonadetes	c__Gemm-3	o__	f__	g__	s__
seq697	27	0	20	0	0	0	k__Bacteria	p__Firmicutes	c__Clostridia	o__Clostridiales	f__Syntrophomonadaceae	g__Syntrophomonas	s__
seq698	20	14	13	0	0	0	k__Bacteria	p__Actinobacteria	c__Thermoleophilia	o__Gaiellales	f__	g__	s__
seq699	17	11	19	0	0	0	k__Bacteria	p__Proteobacteria	c__Gammaproteobacteria	o__Xanthomonadales	f__Xanthomonadaceae	g__Stenotrophomonas
seq700	7	7	9	9	0	15	k__Bacteria	p__Proteobacteria	c__Alphaproteobacteria	o__Rhodospirillales	f__Rhodospirillaceae	g__	s__
seq701	17	0	30	0	0	0	k__Bacteria	p__Actinobacteria	c__Actinobacteria	o__Actinomycetales	f__Intrasporangiaceae	g__Phycicoccus	s__
seq702	0	47	0	0	0	0	k__Bacteria	p__Acidobacteria	c__DA052	o__Ellin6513	f__	g__	s__
seq703	0	31	16	0	0	0	k__Bacteria	p__Proteobacteria	c__Deltaproteobacteria	o__Desulfuromonadales	f__Desulfuromonadaceae	g__	s__
seq704	0	47	0	0	0	0	k__Bacteria	p__Acidobacteria	c__Acidobacteria-6	o__iii1-15	f__	g__	s__
seq705	0	21	0	0	10	16	k__Bacteria	p__Proteobacteria	c__Betaproteobacteria	o__MND1	f__	g__	s__
seq706	0	47	0	0	0	0	k__Bacteria	p__Acidobacteria	c__Solibacteres	o__Solibacterales	f__Solibacteraceae	g__Candidatus Solibacter	s__
seq707	0	14	20	0	13	0	k__Bacteria	p__Proteobacteria	c__Betaproteobacteria	o__Burkholderiales	f__Burkholderiaceae	g__Burkholderia	s__
seq708	0	0	0	19	7	21	k__Bacteria	p__Proteobacteria	c__Alphaproteobacteria	o__Sphingomonadales	f__Erythrobacteraceae
seq709	0	0	0	20	14	13	k__Bacteria	p__Actinobacteria	c__Thermoleophilia	o__Solirubrobacterales
seq710	0	0	0	11	17	19	k__Bacteria	p__Actinobacteria	c__Actinobacteria	o__Actinomycetales	f__Micromonosporaceae	g__Actinoplanes	s__
seq711	0	0	0	16	0	31	k__Bacteria	p__Chloroflexi	c__Thermomicrobia	o__JG30-KF-CM45	f__	g__	s__
seq712	0	0	0	11	20	16	k__Bacteria	p__Proteobacteria	c__Alphaproteobacteria	o__Rhizobiales	f__Bradyrhizobiaceae	g__Balneimonas	s__
seq713	0	0	0	47	0	0	k__Bacteria	p__Firmicutes	c__Bacilli	o__Bacillales	f__Bacillaceae	g__Bacillus
seq714	0	0	0	7	28	12	k__Bacteria	p__Proteobacteria	c__Alphaproteobacteria	o__Rhodobacterales	f__Rhodobacteraceae	g__Rubellimicrobium	s__
seq715	0	0	0	0	24	23	k__Bacteria	p__Firmicutes	c__Bacilli	o__Bacillales	f__Bacillaceae	g__Bacillus
seq716	10	13	23	0	0	0	k__Bacteria	p__Proteobacteria	c__Betaproteobacteria
seq717	11	0	0	0	20	15	k__Bacteria	p__Proteobacteria	c__Gammaproteobacteria	o__Enterobacteriales	f__Enterobacteriaceae
seq718	9	15	22	0	0	0	k__Bacteria	p__Firmicutes	c__Clostridia	o__Clostridiales	f__Clostridiaceae	g__Clostridium
seq719	3	0	0	0	32	11	k__Bacteria	p__Proteobacteria	c__Alphaproteobacteria	o__Rhodospirillales	f__Acetobacteraceae
seq720	0	25	4	0	7	10	k__Bacteria	p__Proteobacteria	c__Gammaproteobacteria	o__Oceanospirillales	f__Oleiphilaceae	g__	s__
seq721	0	24	22	0	0	0	k__Bacteria	p__Actinobacteria	c__Thermoleophilia	o__	f__	g__	s__
seq722	0	38	0	8	0	0	k__Bacteria	p__Acidobacteria	c__DA052	o__Ellin6513	f__	g__	s__
seq723	0	4	0	0	22	20	k__Bacteria	p__Proteobacteria	c__Alphaproteobacteria	o__Rhizobiales	f__Beijerinckiaceae	g__	s__
seq724	0	0	21	0	23	2	k__Bacteria	p__Proteobacteria	c__Betaproteobacteria	o__Burkholderiales
seq725	0	0	16	0	30	0	k__Bacteria	p__Proteobacteria	c__Alphaproteobacteria	o__Caulobacterales	f__Caulobacteraceae	g__Phenylobacterium	s__
seq726	0	0	5	18	17	6	k__Bacteria	p__Proteobacteria	c__Betaproteobacteria	o__Burkholderiales	f__Alcaligenaceae	g__	s__
seq727	0	0	23	23	0	0	k__Bacteria	p__Proteobacteria	c__Gammaproteobacteria	o__Enterobacteriales	f__Enterobacteriaceae	g__Trabulsiella
seq728	0	0	5	10	16	15	k__Bacteria	p__Proteobacteria	c__Gammaproteobacteria	o__Xanthomonadales	f__Xanthomonadaceae	g__Lysobacter	s__
seq729	0	0	0	31	15	0	k__Bacteria	p__Bacteroidetes	c__Cytophagia	o__Cytophagales	f__Flammeovirgaceae	g__	s__
seq730	0	0	0	46	0	0	k__Bacteria	p__Actinobacteria	c__Actinobacteria	o__Actinomycetales	f__Microbacteriaceae	g__Microbacterium	s__
seq731	0	0	0	11	17	18	k__Bacteria	p__Firmicutes	c__Bacilli	o__Bacillales	f__Bacillaceae	g__Bacillus	s__
seq732	0	0	0	31	0	15	k__Bacteria	p__Actinobacteria	c__Actinobacteria	o__Actinomycetales	f__Micromonosporaceae
seq733	0	0	0	0	46	0	k__Bacteria	p__Actinobacteria	c__Actinobacteria	o__Actinomycetales	f__Geodermatophilaceae
seq734	0	0	0	0	46	0	k__Bacteria	p__Actinobacteria	c__Actinobacteria	o__Actinomycetales	f__Micrococcaceae
seq735	29	16	0	0	0	0	k__Bacteria	p__Firmicutes	c__Clostridia	o__Clostridiales	f__[Mogibacteriaceae]	g__	s__
seq736	10	3	8	10	0	14	k__Bacteria	p__Actinobacteria	c__Actinobacteria	o__Actinomycetales	f__Nocardioidaceae	g__Kribbella	s__
seq737	5	5	3	12	9	11	k__Bacteria	p__Firmicutes	c__Bacilli	o__Bacillales	f__Paenibacillaceae	g__Paenibacillus
seq738	23	0	0	22	0	0	k__Bacteria	p__Proteobacteria	c__Deltaproteobacteria	o__Syntrophobacterales	f__Syntrophobacteraceae	g__	s__
seq739	18	11	16	0	0	0	k__Bacteria	p__Proteobacteria	c__Betaproteobacteria	o__Rhodocyclales	f__Rhodocyclaceae	g__Dechloromonas	s__
seq740	45	0	0	0	0	0	k__Bacteria	p__Acidobacteria	c__Acidobacteriia	o__Acidobacteriales	f__Koribacteraceae	g__Candidatus Koribacter	s__
seq741	0	19	8	0	10	8	k__Bacteria	p__Proteobacteria	c__Gammaproteobacteria	o__Alteromonadales	f__Shewanellaceae	g__Shewanella	s__algae
seq742	0	23	0	22	0	0	k__Bacteria	p__Actinobacteria	c__Acidimicrobiia	o__Acidimicrobiales	f__EB1017	g__	s__
seq743	0	26	19	0	0	0	k__Bacteria	p__Proteobacteria	c__Deltaproteobacteria	o__Myxococcales	f__	g__	s__
seq744	0	0	45	0	0	0	k__Bacteria	p__Proteobacteria	c__Betaproteobacteria	o__Rhodocyclales	f__Rhodocyclaceae	g__Dechloromonas	s__
seq745	0	0	0	45	0	0	k__Bacteria	p__Firmicutes	c__Bacilli	o__Bacillales	f__Bacillaceae
seq746	0	0	0	45	0	0	k__Bacteria	p__Proteobacteria	c__Deltaproteobacteria	o__Myxococcales	f__Cystobacteraceae	g__	s__
seq747	0	0	0	14	14	17	k__Bacteria	p__Proteobacteria	c__Betaproteobacteria	o__Burkholderiales
seq748	0	0	0	18	0	27	k__Bacteria	p__Proteobacteria	c__Gammaproteobacteria	o__Enterobacteriales	f__Enterobacteriaceae
seq749	0	0	0	5	15	25	k__Bacteria	p__Firmicutes	c__Bacilli	o__Bacillales	f__Bacillaceae	g__Lentibacillus
seq750	0	0	0	0	45	0	k__Bacteria	p__Firmicutes	c__Clostridia	o__Clostridiales	f__Ruminococcaceae	g__	s__
seq751	0	0	0	0	45	0	k__Bacteria	p__Cyanobacteria	c__Chloroplast	o__Streptophyta	f__	g__	s__
seq752	0	0	0	0	17	28	k__Bacteria	p__Bacteroidetes	c__Cytophagia	o__Cytophagales	f__Cytophagaceae	g__Pontibacter	s__
seq753	0	0	0	0	0	45	k__Bacteria	p__Firmicutes	c__Bacilli	o__Bacillales	f__Bacillaceae	g__Bacillus
seq754	20	0	0	24	0	0	k__Bacteria	p__Actinobacteria	c__Actinobacteria	o__Actinomycetales
seq755	17	27	0	0	0	0	k__Bacteria	p__Proteobacteria	c__Gammaproteobacteria	o__Methylococcales	f__Methylococcaceae	g__Methylocaldum	s__
seq756	24	8	12	0	0	0	k__Bacteria	p__Proteobacteria	c__Deltaproteobacteria	o__Myxococcales
seq757	10	19	15	0	0	0	k__Bacteria	p__Proteobacteria	c__Alphaproteobacteria	o__Rhizobiales	f__Phyllobacteriaceae	g__	s__
seq758	21	0	23	0	0	0	k__Bacteria	p__Spirochaetes	c__[Leptospirae]	o__[Leptospirales]	f__Sediment-4	g__SJA-88	s__
seq759	3	6	8	9	8	10	k__Bacteria	p__Proteobacteria	c__Alphaproteobacteria	o__Sphingomonadales	f__Sphingomonadaceae	g__Sphingobium	s__
seq760	15	12	17	0	0	0	k__Bacteria	p__Actinobacteria	c__OPB41	o__	f__	g__	s__
seq761	0	44	0	0	0	0	k__Bacteria	p__Acidobacteria	c__Acidobacteriia	o__Acidobacteriales	f__Koribacteraceae	g__Candidatus Koribacter	s__
seq762	0	44	0	0	0	0	k__Bacteria	p__Firmicutes	c__Clostridia	o__Clostridiales	f__Syntrophomonadaceae	g__Syntrophomonas	s__
seq763	0	25	0	0	0	19	k__Bacteria	p__Actinobacteria	c__Actinobacteria	o__Actinomycetales	f__Nocardioidaceae	g__Nocardioides	s__
seq764	0	0	44	0	0	0	k__Bacteria	p__Acidobacteria	c__Acidobacteria-6	o__iii1-15	f__	g__	s__
seq765	0	0	44	0	0	0	k__Bacteria	p__Proteobacteria	c__Betaproteobacteria	o__MND1	f__	g__	s__
seq766	0	0	5	0	24	15	k__Bacteria	p__Firmicutes	c__Bacilli	o__Bacillales	f__Bacillaceae	g__Lentibacillus	s__
seq767	0	0	0	22	0	22	k__Bacteria	p__Firmicutes	c__Bacilli	o__Bacillales	f__Bacillaceae
seq768	0	0	0	44	0	0	k__Bacteria	p__Firmicutes	c__Clostridia	o__Clostridiales	f__Ruminococcaceae	g__	s__
seq769	0	0	0	15	9	20	k__Bacteria	p__Chloroflexi	c__Thermomicrobia	o__AKYG1722	f__	g__	s__
seq770	0	0	0	22	0	22	k__Bacteria	p__Chloroflexi	c__Chloroflexi	o__AKIW781	f__	g__	s__
seq771	0	0	0	12	32	0	k__Bacteria	p__Actinobacteria	c__Actinobacteria	o__Actinomycetales	f__Geodermatophilaceae
seq772	0	0	0	0	23	21	k__Bacteria	p__Actinobacteria	c__Actinobacteria	o__Actinomycetales	f__Pseudonocardiaceae	g__Jiangella	s__
seq773	0	0	0	0	44	0	k__Bacteria	p__Proteobacteria	c__Betaproteobacteria	o__Burkholderiales	f__Comamonadaceae
seq774	0	0	0	0	17	27	k__Bacteria	p__Proteobacteria	c__Gammaproteobacteria	o__Enterobacteriales	f__Enterobacteriaceae
seq775	0	0	0	0	0	44	k__Bacteria	p__Firmicutes	c__Bacilli	o__Bacillales	f__	g__	s__
seq776	12	11	20	0	0	0	k__Bacteria	p__Proteobacteria	c__Betaproteobacteria	o__Burkholderiales	f__Comamonadaceae
seq777	22	0	0	21	0	0	k__Bacteria	p__Proteobacteria	c__Alphaproteobacteria	o__Rhodospirillales	f__Rhodospirillaceae	g__	s__
seq778	17	0	0	26	0	0	k__Bacteria	p__Actinobacteria	c__Actinobacteria	o__Actinomycetales	f__Nakamurellaceae	g__	s__
seq779	9	16	18	0	0	0	k__Bacteria	p__OP8	c__OP8_1	o__SHA-124	f__	g__	s__
seq780	4	0	0	7	11	21	k__Bacteria	p__Proteobacteria	c__Betaproteobacteria	o__Burkholderiales
seq781	16	27	0	0	0	0	k__Bacteria	p__Proteobacteria	c__Betaproteobacteria	o__Ellin6067	f__	g__	s__
seq782	0	43	0	0	0	0	k__Bacteria
seq783	0	30	13	0	0	0	k__Bacteria	p__Proteobacteria	c__Alphaproteobacteria	o__Sphingomonadales	f__Sphingomonadaceae	g__Novosphingobium	s__
seq784	0	17	13	13	0	0	k__Bacteria	p__Verrucomicrobia	c__[Spartobacteria]	o__[Chthoniobacterales]	f__[Chthoniobacteraceae]	g__DA101	s__
seq785	0	30	0	0	13	0	k__Bacteria	p__Proteobacteria	c__Deltaproteobacteria	o__Myxococcales	f__Myxococcaceae	g__	s__
seq786	0	24	19	0	0	0	k__Bacteria	p__Acidobacteria	c__Acidobacteria-5	o__	f__	g__	s__
seq787	0	14	10	10	0	9	k__Bacteria	p__Actinobacteria	c__Actinobacteria	o__Actinomycetales	f__Promicromonosporaceae	g__Xylanimicrobium
seq788	0	0	29	0	14	0	k__Bacteria	p__Proteobacteria	c__Alphaproteobacteria	o__Rhizobiales	f__Phyllobacteriaceae
seq789	0	0	43	0	0	0	k__Bacteria	p__Actinobacteria	c__Actinobacteria	o__Actinomycetales	f__Pseudonocardiaceae	g__Pseudonocardia	s__
seq790	0	0	0	20	12	11	k__Bacteria	p__Proteobacteria	c__Gammaproteobacteria	o__Oceanospirillales	f__Halomonadaceae	g__Halomonas	s__
seq791	0	0	0	8	20	15	k__Bacteria	p__Proteobacteria	c__Alphaproteobacteria	o__Rhodobacterales	f__Rhodobacteraceae	g__Rubellimicrobium	s__
seq792	0	0	0	43	0	0	k__Bacteria	p__Actinobacteria	c__Thermoleophilia	o__Solirubrobacterales	f__Conexibacteraceae	g__	s__
seq793	0	0	0	0	32	11	k__Bacteria	p__Actinobacteria	c__Actinobacteria	o__Actinomycetales	f__Micrococcaceae
seq794	0	0	0	0	14	29	k__Bacteria	p__Proteobacteria	c__Deltaproteobacteria	o__Myxococcales	f__Cystobacteraceae	g__	s__
seq795	0	0	0	0	0	43	k__Bacteria	p__Actinobacteria	c__Thermoleophilia	o__Solirubrobacterales	f__	g__	s__
seq796	0	0	0	0	0	43	k__Bacteria	p__Firmicutes	c__Bacilli	o__Bacillales
seq797	12	16	14	0	0	0	k__Bacteria	p__	c__	o__	f__	g__	s__
seq798	25	0	0	17	0	0	k__Bacteria	p__Proteobacteria	c__Gammaproteobacteria	o__Xanthomonadales	f__Xanthomonadaceae	g__	s__
seq799	7	3	8	9	9	6	k__Bacteria	p__Firmicutes	c__Clostridia	o__Clostridiales	f__Ruminococcaceae	g__Butyricicoccus	s__pullicaecorum
seq800	42	0	0	0	0	0	k__Bacteria	p__Actinobacteria	c__Actinobacteria	o__Actinomycetales	f__Geodermatophilaceae	g__Geodermatophilus	s__
seq801	24	0	0	18	0	0	k__Bacteria	p__Proteobacteria	c__Deltaproteobacteria	o__Syntrophobacterales	f__Syntrophobacteraceae	g__	s__
seq802	18	0	0	24	0	0	k__Bacteria	p__Actinobacteria	c__Actinobacteria	o__Actinomycetales
seq803	0	18	0	0	24	0	k__Bacteria	p__Gemmatimonadetes	c__Gemmatimonadetes	o__	f__	g__	s__
seq804	0	18	24	0	0	0	k__Bacteria	p__Actinobacteria	c__Acidimicrobiia	o__Acidimicrobiales	f__	g__	s__
seq805	0	11	0	8	15	8	k__Bacteria	p__Proteobacteria	c__Alphaproteobacteria	o__Rhizobiales	f__Hyphomicrobiaceae	g__Devosia	s__
seq806	0	0	18	0	21	3	k__Bacteria	p__Proteobacteria	c__Gammaproteobacteria
seq807	0	0	15	0	9	18	k__Bacteria	p__Actinobacteria	c__Actinobacteria	o__Actinomycetales	f__Actinosynnemataceae	g__	s__
seq808	0	0	23	0	19	0	k__Bacteria	p__Acidobacteria	c__Acidobacteriia	o__Acidobacteriales	f__Koribacteraceae	g__Candidatus Koribacter	s__
seq809	0	0	19	0	23	0	k__Bacteria	p__Proteobacteria	c__Gammaproteobacteria	o__Xanthomonadales	f__Xanthomonadaceae	g__Stenotrophomonas	s__
seq810	0	0	4	0	5	33	k__Bacteria	p__Proteobacteria	c__Gammaproteobacteria
seq811	0	0	22	0	20	0	k__Bacteria	p__Actinobacteria	c__Actinobacteria	o__Actinomycetales	f__Pseudonocardiaceae	g__	s__
seq812	0	0	0	10	15	17	k__Bacteria	p__Bacteroidetes	c__[Saprospirae]	o__[Saprospirales]	f__Chitinophagaceae	g__Flavisolibacter	s__
seq813	0	0	0	12	9	21	k__Bacteria	p__Proteobacteria	c__Gammaproteobacteria	o__Xanthomonadales	f__Xanthomonadaceae
seq814	0	0	0	18	24	0	k__Bacteria	p__Firmicutes	c__Bacilli	o__Bacillales	f__Bacillaceae	g__Bacillus	s__
seq815	0	0	0	9	15	18	k__Bacteria	p__Proteobacteria	c__Betaproteobacteria	o__Burkholderiales	f__Alcaligenaceae	g__	s__
seq816	0	0	0	0	20	22	k__Bacteria	p__Firmicutes	c__Bacilli	o__Bacillales	f__Bacillaceae
seq817	0	0	0	0	42	0	k__Bacteria	p__Proteobacteria	c__Alphaproteobacteria	o__Rickettsiales	f__mitochondria
seq818	0	0	0	0	0	42	k__Bacteria	p__Proteobacteria	c__Deltaproteobacteria	o__Syntrophobacterales	f__Syntrophobacteraceae	g__	s__
seq819	16	14	11	0	0	0	k__Bacteria	p__Proteobacteria	c__Deltaproteobacteria	o__Syntrophobacterales	f__Syntrophorhabdaceae	g__	s__
seq820	7	0	0	15	7	12	k__Bacteria	p__Proteobacteria	c__Alphaproteobacteria	o__Rhodospirillales	f__	g__	s__
seq821	6	0	0	0	35	0	k__Bacteria	p__Proteobacteria	c__Alphaproteobacteria	o__Rhodobacterales	f__Rhodobacteraceae	g__Paracoccus
seq822	12	11	18	0	0	0	k__Bacteria	p__Proteobacteria	c__Betaproteobacteria	o__Burkholderiales	f__Comamonadaceae	g__Hylemonella	s__
seq823	0	0	28	0	13	0	k__Archaea	p__[Parvarchaeota]	c__[Parvarchaea]	o__YLA114	f__	g__	s__
seq824	0	0	15	0	22	4	k__Bacteria	p__Proteobacteria	c__Gammaproteobacteria
seq825	0	0	7	14	0	20	k__Bacteria	p__Proteobacteria	c__Alphaproteobacteria	o__Rhodospirillales	f__Acetobacteraceae	g__	s__
seq826	0	0	0	41	0	0	k__Bacteria	p__Bacteroidetes	c__Cytophagia	o__Cytophagales	f__Cytophagaceae	g__Hymenobacter	s__
seq827	0	0	0	15	14	12	k__Bacteria	p__Actinobacteria	c__Actinobacteria	o__Actinomycetales	f__Nocardioidaceae	g__Actinopolymorpha	s__
seq828	0	0	0	10	18	13	k__Bacteria	p__Firmicutes	c__Bacilli	o__Bacillales	f__Bacillaceae	g__Bacillus
seq829	0	0	0	19	0	22	k__Bacteria	p__Actinobacteria	c__Actinobacteria	o__Actinomycetales	f__Actinosynnemataceae
seq830	0	0	0	13	0	28	k__Bacteria	p__Actinobacteria	c__Actinobacteria	o__Actinomycetales	f__Thermomonosporaceae
seq831	0	0	0	8	13	20	k__Bacteria	p__Proteobacteria	c__Gammaproteobacteria	o__Pseudomonadales	f__Pseudomonadaceae	g__Pseudomonas	s__pseudoalcaligenes
seq832	0	0	0	41	0	0	k__Bacteria	p__Actinobacteria	c__Actinobacteria	o__Actinomycetales	f__Micromonosporaceae	g__	s__
seq833	0	0	0	11	17	13	k__Bacteria	p__Firmicutes	c__Bacilli	o__Bacillales	f__Planococcaceae	g__Sporosarcina	s__ginsengi
seq834	0	0	0	11	30	0	k__Bacteria	p__Proteobacteria	c__Alphaproteobacteria	o__Sphingomonadales	f__Sphingomonadaceae	g__Sphingomonas	s__
seq835	0	0	0	5	23	13	k__Bacteria	p__Bacteroidetes	c__[Saprospirae]	o__[Saprospirales]	f__Chitinophagaceae	g__Flavisolibacter	s__
seq836	0	0	0	0	41	0	k__Bacteria	p__Bacteroidetes	c__Flavobacteriia	o__Flavobacteriales	f__Flavobacteriaceae
seq837	0	0	0	0	24	17	k__Bacteria	p__Actinobacteria	c__Acidimicrobiia	o__Acidimicrobiales
seq838	0	0	0	0	26	15	k__Bacteria	p__Proteobacteria	c__Alphaproteobacteria	o__Sphingomonadales	f__Sphingomonadaceae	g__	s__
seq839	0	0	0	0	22	19	k__Bacteria	p__Proteobacteria	c__Alphaproteobacteria	o__Rhizobiales	f__Rhizobiaceae
seq840	0	0	0	0	41	0	k__Bacteria	p__Firmicutes	c__Bacilli	o__Bacillales	f__Bacillaceae	g__Bacillus
seq841	0	0	0	0	20	21	k__Bacteria	p__Actinobacteria	c__Actinobacteria	o__Actinomycetales	f__Promicromonosporaceae
seq842	0	0	0	0	41	0	k__Bacteria	p__Cyanobacteria	c__Chloroplast	o__Streptophyta	f__	g__	s__
seq843	0	0	0	0	0	41	k__Bacteria	p__Actinobacteria	c__Thermoleophilia	o__Gaiellales	f__Gaiellaceae	g__	s__
seq844	19	0	0	21	0	0	k__Bacteria	p__Actinobacteria	c__MB-A2-108	o__0319-7L14	f__	g__	s__
seq845	15	15	10	0	0	0	k__Bacteria	p__Actinobacteria	c__Actinobacteria	o__Actinomycetales	f__Nocardioidaceae	g__Propionicimonas	s__
seq846	19	0	0	21	0	0	k__Bacteria	p__Actinobacteria	c__Actinobacteria	o__Actinomycetales	f__Micromonosporaceae
seq847	20	0	0	20	0	0	k__Bacteria	p__Acidobacteria	c__Acidobacteriia	o__Acidobacteriales	f__Koribacteraceae	g__Candidatus Koribacter	s__
seq848	4	8	0	0	13	15	k__Bacteria	p__Proteobacteria	c__Alphaproteobacteria	o__Rhodobacterales	f__Rhodobacteraceae	g__Paracoccus
seq849	8	17	15	0	0	0	k__Bacteria	p__Proteobacteria	c__Deltaproteobacteria	o__Syntrophobacterales	f__Syntrophaceae	g__Syntrophus	s__
seq850	19	0	0	21	0	0	k__Bacteria	p__Actinobacteria	c__Actinobacteria	o__Actinomycetales	f__Streptomycetaceae
seq851	0	40	0	0	0	0	k__Bacteria	p__Nitrospirae	c__Nitrospira	o__Nitrospirales	f__0319-6A21	g__	s__
seq852	0	40	0	0	0	0	k__Bacteria	p__Proteobacteria	c__Deltaproteobacteria	o__[Entotheonellales]	f__[Entotheonellaceae]	g__	s__
seq853	0	5	7	5	4	19	k__Bacteria	p__Firmicutes	c__Clostridia	o__Clostridiales	f__[Tissierellaceae]	g__Sedimentibacter	s__
seq854	0	21	19	0	0	0	k__Bacteria	p__Proteobacteria	c__Alphaproteobacteria	o__Sphingomonadales	f__Sphingomonadaceae	g__Novosphingobium	s__
seq855	0	40	0	0	0	0	k__Bacteria	p__Actinobacteria	c__Thermoleophilia	o__Gaiellales	f__Gaiellaceae	g__	s__
seq856	0	15	0	0	25	0	k__Bacteria	p__Actinobacteria	c__Actinobacteria	o__Actinomycetales	f__Nocardioidaceae	g__	s__
seq857	0	15	25	0	0	0	k__Bacteria	p__Actinobacteria	c__Actinobacteria	o__Actinomycetales	f__Gordoniaceae	g__Gordonia	s__
seq858	0	0	8	0	32	0	k__Bacteria	p__Bacteroidetes	c__Cytophagia	o__Cytophagales	f__Cytophagaceae	g__Adhaeribacter	s__
seq859	0	0	0	6	14	20	k__Bacteria	p__Actinobacteria	c__Actinobacteria	o__Actinomycetales	f__Nocardiopsaceae	g__	s__
seq860	0	0	0	9	19	12	k__Bacteria	p__Actinobacteria	c__Actinobacteria	o__Actinomycetales	f__Dietziaceae	g__Dietzia	s__
seq861	0	0	0	0	0	40	k__Bacteria	p__Chloroflexi	c__Chloroflexi	o__AKIW781	f__	g__	s__
seq862	0	0	0	0	0	40	k__Bacteria	p__Acidobacteria	c__Solibacteres	o__Solibacterales	f__Solibacteraceae	g__Candidatus Solibacter	s__
seq863	21	0	0	18	0	0	k__Bacteria	p__Proteobacteria	c__Alphaproteobacteria	o__Rhodospirillales	f__Rhodospirillaceae	g__	s__
seq864	19	0	20	0	0	0	k__Bacteria	p__Acidobacteria	c__RB25	o__	f__	g__	s__
seq865	11	14	14	0	0	0	k__Bacteria	p__Proteobacteria	c__Gammaproteobacteria	o__HOC36	f__	g__	s__
seq866	19	9	5	0	6	0	k__Bacteria	p__Proteobacteria	c__Betaproteobacteria	o__A21b	f__EB1003	g__	s__
seq867	14	0	0	0	8	17	k__Bacteria	p__Proteobacteria	c__Alphaproteobacteria	o__Caulobacterales	f__Caulobacteraceae	g__Phenylobacterium	s__
seq868	11	0	0	28	0	0	k__Bacteria	p__Proteobacteria	c__Betaproteobacteria	o__Burkholderiales	f__Comamonadaceae
seq869	0	15	24	0	0	0	k__Bacteria	p__Proteobacteria	c__Alphaproteobacteria	o__Rhodobacterales	f__Rhodobacteraceae
seq870	0	39	0	0	0	0	k__Bacteria	p__Acidobacteria	c__Solibacteres	o__Solibacterales	f__Solibacteraceae	g__Candidatus Solibacter	s__
seq871	0	25	14	0	0	0	k__Bacteria	p__Actinobacteria	c__Actinobacteria	o__Actinomycetales	f__Micromonosporaceae	g__	s__
seq872	0	0	0	14	12	13	k__Bacteria	p__Actinobacteria	c__Actinobacteria	o__Actinomycetales	f__Pseudonocardiaceae	g__Saccharopolyspora	s__
seq873	0	0	0	14	16	9	k__Bacteria	p__Proteobacteria	c__Alphaproteobacteria	o__Sphingomonadales	f__Sphingomonadaceae	g__	s__
seq874	0	0	0	9	15	15	k__Bacteria	p__Firmicutes	c__Bacilli	o__Bacillales	f__Thermoactinomycetaceae	g__Thermoactinomyces	s__
seq875	0	0	0	0	0	39	k__Bacteria	p__Chloroflexi	c__Anaerolineae	o__A31	f__S47	g__	s__
seq876	0	0	0	0	0	39	k__Bacteria	p__Acidobacteria	c__Acidobacteria-6	o__iii1-15	f__	g__	s__
seq877	0	0	0	0	0	39	k__Bacteria	p__Proteobacteria	c__Betaproteobacteria	o__Burkholderiales	f__Oxalobacteraceae	g__	s__
seq878	0	0	0	0	0	39	k__Bacteria	p__Firmicutes	c__Bacilli	o__Bacillales	f__Planococcaceae	g__Planomicrobium	s__
seq879	0	0	0	0	0	39	k__Bacteria	p__Actinobacteria	c__Thermoleophilia	o__Gaiellales	f__Gaiellaceae	g__	s__
seq880	14	14	10	0	0	0	k__Bacteria	p__Actinobacteria	c__Actinobacteria	o__Actinomycetales	f__	g__	s__
seq881	13	15	10	0	0	0	k__Bacteria	p__Firmicutes	c__Clostridia	o__Clostridiales	f__Syntrophomonadaceae	g__Syntrophomonas	s__
seq882	18	9	11	0	0	0	k__Bacteria	p__Chloroflexi	c__Anaerolineae	o__SJA-15	f__	g__	s__
seq883	6	6	11	8	0	7	k__Bacteria	p__Proteobacteria	c__Gammaproteobacteria	o__Pseudomonadales	f__Pseudomonadaceae
seq884	11	15	0	12	0	0	k__Bacteria	p__Proteobacteria	c__Deltaproteobacteria	o__Syntrophobacterales	f__Syntrophobacteraceae	g__	s__
seq885	17	0	0	21	0	0	k__Bacteria	p__Actinobacteria	c__Acidimicrobiia	o__Acidimicrobiales	f__EB1017	g__	s__
seq886	6	6	15	0	11	0	k__Bacteria	p__Actinobacteria	c__Acidimicrobiia	o__Acidimicrobiales	f__	g__	s__
seq887	3	0	0	17	9	9	k__Bacteria	p__Bacteroidetes	c__[Rhodothermi]	o__[Rhodothermales]	f__Rhodothermaceae	g__	s__
seq888	0	38	0	0	0	0	k__Bacteria	p__Proteobacteria	c__Alphaproteobacteria	o__Kiloniellales	f__	g__	s__
seq889	0	18	0	0	4	16	k__Bacteria	p__Proteobacteria	c__Gammaproteobacteria	o__Vibrionales	f__Vibrionaceae	g__Vibrio	s__
seq890	0	19	12	0	7	0	k__Bacteria	p__Proteobacteria	c__Deltaproteobacteria	o__Syntrophobacterales	f__Syntrophobacteraceae	g__	s__
seq891	0	0	14	0	13	11	k__Bacteria	p__Proteobacteria	c__Gammaproteobacteria	o__Alteromonadales	f__Alteromonadaceae	g__nsmpVI18	s__
seq892	0	0	0	18	10	10	k__Bacteria	p__Firmicutes	c__Bacilli	o__Bacillales	f__Paenibacillaceae	g__Ammoniphilus	s__
seq893	0	0	0	26	12	0	k__Bacteria	p__Firmicutes	c__Bacilli	o__Bacillales	f__Paenibacillaceae	g__	s__
seq894	0	0	0	22	0	16	k__Bacteria	p__Actinobacteria	c__Actinobacteria	o__Actinomycetales	f__Microbacteriaceae
seq895	0	0	0	0	38	0	k__Bacteria	p__Firmicutes	c__Bacilli	o__Bacillales	f__Bacillaceae
seq896	0	0	0	0	38	0	k__Bacteria	p__Firmicutes	c__Bacilli	o__Bacillales	f__Bacillaceae
seq897	0	0	0	0	21	17	k__Bacteria	p__Firmicutes	c__Bacilli	o__Bacillales	f__Staphylococcaceae	g__Salinicoccus	s__
seq898	0	0	0	0	0	38	k__Bacteria	p__Firmicutes	c__Bacilli	o__Bacillales	f__Paenibacillaceae	g__Paenibacillus	s__
seq899	22	0	15	0	0	0	k__Bacteria	p__Chloroflexi	c__Anaerolineae	o__SJA-15	f__	g__	s__
seq900	8	17	12	0	0	0	k__Bacteria	p__Verrucomicrobia	c__[Pedosphaerae]	o__[Pedosphaerales]	f__Ellin515	g__	s__
seq901	7	17	13	0	0	0	k__Bacteria	p__TPD-58	c__	o__	f__	g__	s__
seq902	20	0	0	17	0	0	k__Bacteria	p__Proteobacteria	c__Alphaproteobacteria	o__Rhizobiales	f__Hyphomicrobiaceae	g__Rhodoplanes	s__
seq903	8	14	15	0	0	0	k__Bacteria	p__Proteobacteria	c__Betaproteobacteria	o__Burkholderiales	f__Comamonadaceae	g__Diaphorobacter	s__
seq904	4	18	0	0	7	8	k__Bacteria	p__Proteobacteria	c__Deltaproteobacteria	o__Myxococcales	f__	g__	s__
seq905	0	9	28	0	0	0	k__Bacteria	p__Chloroflexi	c__Anaerolineae	o__Anaerolineales	f__Anaerolinaceae	g__WCHB1-05	s__
seq906	0	0	19	0	18	0	k__Bacteria	p__Firmicutes	c__Clostridia	o__Clostridiales	f__[Mogibacteriaceae]	g__Anaerovorax	s__
seq907	0	0	20	0	17	0	k__Bacteria	p__Proteobacteria	c__Gammaproteobacteria	o__Oceanospirillales	f__Oleiphilaceae	g__	s__
seq908	0	0	10	0	7	20	k__Bacteria	p__Proteobacteria	c__Alphaproteobacteria	o__Rhodobacterales	f__Rhodobacteraceae
seq909	0	0	21	0	16	0	k__Bacteria	p__Proteobacteria	c__Alphaproteobacteria	o__Rhodobacterales	f__Rhodobacteraceae	g__Paracoccus	s__
seq910	0	0	0	33	0	4	k__Bacteria	p__Proteobacteria	c__Gammaproteobacteria	o__Legionellales
seq911	0	0	0	14	8	15	k__Bacteria	p__Actinobacteria	c__Acidimicrobiia	o__Acidimicrobiales	f__	g__	s__
seq912	0	0	0	10	15	12	k__Bacteria	p__Bacteroidetes	c__[Saprospirae]	o__[Saprospirales]	f__Chitinophagaceae	g__Flavisolibacter	s__
seq913	0	0	0	10	0	27	k__Bacteria	p__Proteobacteria	c__Alphaproteobacteria	o__Sphingomonadales	f__Erythrobacteraceae
seq914	0	0	0	19	0	18	k__Bacteria	p__Proteobacteria	c__Alphaproteobacteria	o__Sphingomonadales	f__Sphingomonadaceae
seq915	0	0	0	9	14	14	k__Bacteria	p__Proteobacteria	c__Alphaproteobacteria	o__Sphingomonadales	f__Sphingomonadaceae	g__Novosphingobium	s__
seq916	0	0	0	11	5	21	k__Bacteria	p__Proteobacteria	c__Alphaproteobacteria	o__Rhizobiales	f__Rhizobiaceae	g__Agrobacterium	s__
seq917	0	0	0	0	26	11	k__Bacteria	p__Proteobacteria	c__Alphaproteobacteria	o__Rhodobacterales	f__Rhodobacteraceae	g__Rubellimicrobium	s__
seq918	0	0	0	0	37	0	k__Bacteria	p__Actinobacteria	c__Actinobacteria	o__Actinomycetales	f__Micromonosporaceae	g__Actinoplanes	s__
seq919	0	0	0	0	24	13	k__Bacteria	p__Proteobacteria	c__Betaproteobacteria	o__MND1	f__	g__	s__
seq920	0	0	0	0	37	0	k__Bacteria	p__Firmicutes	c__Bacilli	o__Bacillales	f__Bacillaceae	g__Bacillus
seq921	0	0	0	0	0	37	k__Bacteria	p__Proteobacteria	c__Alphaproteobacteria	o__Rhodospirillales	f__Rhodospirillaceae	g__	s__
seq922	0	0	0	0	0	37	k__Bacteria	p__Proteobacteria	c__Alphaproteobacteria	o__Sphingomonadales	f__Sphingomonadaceae
seq923	18	0	0	9	9	0	k__Bacteria	p__Proteobacteria	c__Alphaproteobacteria	o__Rhodospirillales	f__Rhodospirillaceae	g__	s__
seq924	10	10	16	0	0	0	k__Bacteria	p__Synergistetes	c__Synergistia	o__Synergistales	f__Dethiosulfovibrionaceae	g__	s__
seq925	17	0	0	19	0	0	k__Bacteria	p__Proteobacteria	c__Betaproteobacteria	o__Burkholderiales	f__Burkholderiaceae
seq926	18	18	0	0	0	0	k__Bacteria	p__Proteobacteria	c__Deltaproteobacteria	o__GW-28	f__	g__	s__
seq927	11	9	16	0	0	0	k__Bacteria	p__Proteobacteria	c__Gammaproteobacteria	o__Chromatiales
seq928	36	0	0	0	0	0	k__Bacteria	p__Actinobacteria	c__Actinobacteria	o__Actinomycetales	f__Microbacteriaceae
seq929	4	0	8	0	24	0	k__Bacteria	p__Proteobacteria	c__Alphaproteobacteria	o__Sphingomonadales	f__Erythrobacteraceae
seq930	8	15	13	0	0	0	k__Bacteria	p__Chloroflexi	c__Anaerolineae	o__SJA-15	f__	g__	s__
seq931	36	0	0	0	0	0	k__Bacteria	p__Acidobacteria	c__Solibacteres	o__Solibacterales	f__Solibacteraceae	g__Candidatus Solibacter	s__
seq932	8	8	20	0	0	0	k__Bacteria	p__Proteobacteria	c__Betaproteobacteria	o__Rhodocyclales	f__Rhodocyclaceae	g__Azospira	s__
seq933	0	18	0	13	0	5	k__Bacteria	p__Acidobacteria	c__Acidobacteriia	o__Acidobacteriales	f__Acidobacteriaceae	g__	s__
seq934	0	36	0	0	0	0	k__Bacteria	p__Actinobacteria	c__Thermoleophilia	o__Gaiellales	f__Gaiellaceae	g__	s__
seq935	0	18	0	0	0	18	k__Bacteria	p__Actinobacteria	c__Actinobacteria	o__Actinomycetales	f__Micromonosporaceae	g__Dactylosporangium	s__
seq936	0	10	26	0	0	0	k__Bacteria	p__Proteobacteria	c__Deltaproteobacteria	o__Myxococcales	f__	g__	s__
seq937	0	0	0	10	15	11	k__Bacteria	p__Proteobacteria	c__Alphaproteobacteria	o__Rhizobiales	f__Methylocystaceae	g__Pleomorphomonas	s__
seq938	0	0	0	12	12	12	k__Bacteria	p__Firmicutes	c__Bacilli	o__Lactobacillales	f__Aerococcaceae	g__Alkalibacterium	s__
seq939	0	0	0	10	16	10	k__Bacteria	p__Firmicutes	c__Clostridia	o__Clostridiales	f__Ruminococcaceae
seq940	0	0	0	13	10	13	k__Bacteria	p__Actinobacteria	c__Acidimicrobiia	o__Acidimicrobiales	f__C111	g__	s__
seq941	0	0	0	12	18	6	k__Bacteria	p__Firmicutes	c__Bacilli	o__Bacillales	f__Bacillaceae	g__Bacillus	s__
seq942	0	0	0	6	8	22	k__Bacteria	p__Proteobacteria	c__Alphaproteobacteria	o__Rhizobiales
seq943	0	0	0	15	21	0	k__Bacteria	p__Firmicutes	c__Bacilli	o__Bacillales	f__Bacillaceae	g__Bacillus	s__
seq944	0	0	0	0	36	0	k__Bacteria	p__Firmicutes	c__Bacilli	o__Bacillales	f__Alicyclobacillaceae	g__Alicyclobacillus	s__
seq945	0	0	0	0	36	0	k__Bacteria	p__Actinobacteria	c__Actinobacteria	o__Actinomycetales	f__Geodermatophilaceae
seq946	0	0	0	0	36	0	k__Bacteria	p__Firmicutes	c__Bacilli	o__Bacillales	f__Alicyclobacillaceae	g__Alicyclobacillus	s__
seq947	0	0	0	0	0	36	k__Bacteria	p__Actinobacteria	c__Thermoleophilia	o__Gaiellales	f__Gaiellaceae	g__	s__
seq948	0	0	0	0	0	36	k__Bacteria	p__Proteobacteria	c__Betaproteobacteria	o__Burkholderiales	f__Comamonadaceae	g__Ramlibacter	s__
seq949	14	9	12	0	0	0	k__Bacteria	p__Proteobacteria	c__Deltaproteobacteria	o__Syntrophobacterales	f__Syntrophaceae	g__Syntrophus	s__
seq950	11	11	13	0	0	0	k__Bacteria	p__Proteobacteria	c__Deltaproteobacteria	o__Desulfuromonadales	f__Geobacteraceae	g__Geobacter	s__
seq951	11	15	9	0	0	0	k__Bacteria	p__Proteobacteria	c__Gammaproteobacteria	o__Thiotrichales	f__Thiotrichaceae	g__	s__
seq952	35	0	0	0	0	0	k__Bacteria	p__Actinobacteria	c__Thermoleophilia	o__Gaiellales	f__Gaiellaceae	g__	s__
seq953	11	17	7	0	0	0	k__Bacteria	p__Firmicutes	c__Clostridia	o__Clostridiales	f__Clostridiaceae	g__	s__
seq954	17	0	18	0	0	0	k__Bacteria	p__Firmicutes	c__Clostridia	o__Clostridiales	f__Syntrophomonadaceae	g__Syntrophomonas	s__
seq955	18	0	0	0	17	0	k__Bacteria	p__Actinobacteria	c__Actinobacteria
seq956	18	0	17	0	0	0	k__Bacteria	p__Actinobacteria	c__Actinobacteria	o__Actinomycetales	f__Mycobacteriaceae	g__Mycobacterium
seq957	0	11	0	0	10	14	k__Bacteria	p__Proteobacteria	c__Epsilonproteobacteria	o__Campylobacterales	f__Campylobacteraceae	g__Arcobacter	s__
seq958	0	0	23	0	12	0	k__Bacteria	p__Proteobacteria	c__Alphaproteobacteria	o__Rickettsiales	f__	g__	s__
seq959	0	0	0	35	0	0	k__Bacteria	p__Firmicutes	c__Bacilli	o__Bacillales	f__Alicyclobacillaceae	g__Alicyclobacillus	s__
seq960	0	0	0	35	0	0	k__Bacteria	p__Actinobacteria	c__Actinobacteria	o__Actinomycetales	f__Geodermatophilaceae	g__Geodermatophilus	s__
seq961	0	0	0	10	17	8	k__Bacteria	p__Actinobacteria	c__Actinobacteria	o__Actinomycetales	f__Streptomycetaceae	g__Streptomyces	s__thermoatroviridis
seq962	0	0	0	0	35	0	k__Bacteria	p__Firmicutes	c__Bacilli	o__Lactobacillales	f__Aerococcaceae	g__Atopococcus	s__tabaci
seq963	0	0	0	0	16	19	k__Bacteria	p__Gemmatimonadetes	c__Gemmatimonadetes	o__Gemmatimonadales	f__	g__	s__
seq964	0	0	0	0	35	0	k__Bacteria	p__Actinobacteria	c__Rubrobacteria	o__Rubrobacterales	f__Rubrobacteraceae	g__Rubrobacter	s__
seq965	0	0	0	0	35	0	k__Bacteria	p__Proteobacteria	c__Gammaproteobacteria	o__Xanthomonadales	f__Sinobacteraceae	g__	s__
seq966	0	0	0	0	35	0	k__Bacteria	p__Acidobacteria	c__Acidobacteriia	o__Acidobacteriales	f__Koribacteraceae	g__Candidatus Koribacter	s__
seq967	0	0	0	0	13	22	k__Bacteria	p__Proteobacteria	c__Gammaproteobacteria	o__Enterobacteriales	f__Enterobacteriaceae	g__Erwinia	s__dispersa
seq968	0	0	0	0	35	0	k__Bacteria	p__Firmicutes	c__Bacilli	o__Bacillales	f__Bacillaceae	g__Bacillus	s__humi
seq969	12	0	0	22	0	0	k__Bacteria	p__Gemmatimonadetes	c__Gemmatimonadetes	o__	f__	g__	s__
seq970	20	0	14	0	0	0	k__Bacteria	p__Actinobacteria	c__Actinobacteria	o__Actinomycetales	f__Propionibacteriaceae	g__	s__
seq971	11	9	14	0	0	0	k__Bacteria	p__Actinobacteria	c__Thermoleophilia	o__Gaiellales	f__	g__	s__
seq972	9	9	0	0	0	16	k__Bacteria	p__Firmicutes	c__Clostridia	o__Clostridiales	f__Clostridiaceae
seq973	0	16	18	0	0	0	k__Bacteria	p__Proteobacteria	c__Deltaproteobacteria	o__Desulfovibrionales	f__Desulfomicrobiaceae	g__Desulfomicrobium	s__
seq974	0	13	21	0	0	0	k__Bacteria	p__Actinobacteria	c__Actinobacteria
seq975	0	8	7	5	9	5	k__Bacteria	p__Proteobacteria	c__Betaproteobacteria	o__Rhodocyclales	f__Rhodocyclaceae	g__Methyloversatilis	s__
seq976	0	0	22	0	12	0	k__Archaea	p__[Parvarchaeota]	c__[Parvarchaea]	o__WCHD3-30	f__	g__	s__
seq977	0	0	23	0	11	0	k__Bacteria	p__Proteobacteria	c__Deltaproteobacteria	o__Desulfovibrionales	f__Desulfovibrionaceae	g__Desulfovibrio	s__
seq978	0	0	34	0	0	0	k__Bacteria	p__Chloroflexi	c__Ellin6529	o__	f__	g__	s__
seq979	0	0	4	9	10	11	k__Bacteria	p__Proteobacteria	c__Betaproteobacteria	o__Burkholderiales	f__Alcaligenaceae
seq980	0	0	2	0	9	23	k__Bacteria	p__Bacteroidetes	c__Cytophagia	o__Cytophagales	f__Cyclobacteriaceae	g__	s__
seq981	0	0	0	34	0	0	k__Bacteria	p__Gemmatimonadetes	c__Gemm-3	o__	f__	g__	s__
seq982	0	0	0	34	0	0	k__Bacteria	p__Proteobacteria	c__Alphaproteobacteria	o__Rhodobacterales	f__Rhodobacteraceae	g__Rubellimicrobium	s__
seq983	0	0	0	13	0	21	k__Bacteria	p__Gemmatimonadetes	c__Gemm-3	o__	f__	g__	s__
seq984	0	0	0	10	0	24	k__Bacteria	p__Proteobacteria	c__Betaproteobacteria	o__Burkholderiales	f__Comamonadaceae	g__Comamonas	s__
seq985	0	0	0	34	0	0	k__Bacteria	p__Acidobacteria	c__Solibacteres	o__Solibacterales	f__Solibacteraceae	g__Candidatus Solibacter	s__
seq986	0	0	0	6	28	0	k__Bacteria	p__Firmicutes	c__Bacilli	o__Bacillales	f__Bacillaceae
seq987	0	0	0	0	0	34	k__Bacteria	p__Proteobacteria	c__Deltaproteobacteria	o__Myxococcales
seq988	0	0	0	0	0	34	k__Bacteria	p__Actinobacteria	c__Actinobacteria	o__Actinomycetales	f__Nocardioidaceae	g__	s__
seq989	18	10	5	0	0	0	k__Bacteria	p__Firmicutes	c__Clostridia	o__Clostridiales	f__Clostridiaceae
seq990	33	0	0	0	0	0	k__Bacteria	p__AD3	c__ABS-6	o__	f__	g__	s__
seq991	19	0	8	6	0	0	k__Bacteria	p__Proteobacteria	c__Deltaproteobacteria	o__Syntrophobacterales	f__Syntrophobacteraceae	g__	s__
seq992	25	8	0	0	0	0	k__Bacteria	p__Actinobacteria	c__Actinobacteria	o__Actinomycetales	f__Micrococcaceae	g__Sinomonas	s__
seq993	13	0	20	0	0	0	k__Bacteria	p__Proteobacteria	c__Deltaproteobacteria	o__Syntrophobacterales	f__Syntrophorhabdaceae	g__	s__
seq994	8	10	15	0	0	0	k__Bacteria	p__Firmicutes	c__Clostridia	o__Clostridiales	f__Clostridiaceae	g__Clostridium
seq995	21	0	0	12	0	0	k__Bacteria	p__Chloroflexi	c__Ktedonobacteria	o__JG30-KF-AS9	f__	g__	s__
seq996	14	0	0	7	12	0	k__Bacteria	p__Actinobacteria	c__Thermoleophilia	o__Gaiellales	f__Gaiellaceae	g__	s__
seq997	14	0	0	19	0	0	k__Bacteria	p__Actinobacteria	c__Actinobacteria	o__Actinomycetales	f__Frankiaceae	g__	s__
seq998	33	0	0	0	0	0	k__Bacteria	p__Firmicutes	c__Bacilli	o__Bacillales	f__Bacillaceae	g__Bacillus
seq999	0	21	10	0	0	2	k__Bacteria	p__WPS-2	c__	o__	f__	g__	s__
seq1000	0	15	9	0	4	5	k__Bacteria	p__WS3	c__PRR-12	o__Sediment-1	f__	g__	s__
seq1001	0	18	15	0	0	0	k__Bacteria	p__Cyanobacteria	c__4C0d-2	o__MLE1-12	f__	g__	s__
seq1002	0	19	9	0	5	0	k__Bacteria	p__Proteobacteria	c__Alphaproteobacteria	o__Ellin329	f__	g__	s__
seq1003	0	17	0	0	0	16	k__Bacteria	p__Actinobacteria	c__Actinobacteria	o__Actinomycetales	f__Mycobacteriaceae	g__Mycobacterium	s__
seq1004	0	7	9	0	9	8	k__Bacteria	p__Firmicutes	c__Clostridia	o__Clostridiales	f__Lachnospiraceae	g__Dorea	s__
seq1005	0	33	0	0	0	0	k__Bacteria	p__Actinobacteria	c__Thermoleophilia	o__Gaiellales	f__Gaiellaceae	g__	s__
seq1006	0	11	0	0	22	0	k__Bacteria	p__Proteobacteria	c__Betaproteobacteria	o__Burkholderiales	f__Comamonadaceae
seq1007	0	0	25	0	8	0	k__Bacteria	p__Proteobacteria	c__TA18	o__CV90	f__	g__	s__
seq1008	0	0	33	0	0	0	k__Bacteria	p__Actinobacteria	c__Thermoleophilia	o__Gaiellales	f__Gaiellaceae	g__	s__
seq1009	0	0	3	6	17	7	k__Bacteria	p__Bacteroidetes	c__Cytophagia	o__Cytophagales	f__Cytophagaceae	g__Adhaeribacter	s__
seq1010	0	0	0	13	0	20	k__Bacteria	p__Proteobacteria	c__Gammaproteobacteria	o__Alteromonadales	f__Alteromonadaceae	g__Cellvibrio	s__
seq1011	0	0	0	20	0	13	k__Bacteria	p__Chloroflexi	c__Thermomicrobia	o__JG30-KF-CM45	f__	g__	s__
seq1012	0	0	0	12	10	11	k__Bacteria	p__Firmicutes	c__Bacilli	o__Bacillales
seq1013	0	0	0	33	0	0	k__Bacteria	p__Firmicutes	c__Bacilli	o__Bacillales	f__Alicyclobacillaceae	g__Alicyclobacillus	s__
seq1014	0	0	0	0	25	8	k__Bacteria	p__Bacteroidetes	c__Flavobacteriia	o__Flavobacteriales	f__Flavobacteriaceae
seq1015	0	0	0	0	33	0	k__Bacteria	p__Chloroflexi	c__Thermomicrobia	o__JG30-KF-CM45	f__	g__	s__
seq1016	0	0	0	0	33	0	k__Bacteria	p__Firmicutes	c__Bacilli	o__Bacillales	f__Bacillaceae	g__Bacillus	s__
seq1017	0	0	0	0	0	33	k__Bacteria	p__Proteobacteria	c__Alphaproteobacteria	o__Rickettsiales
seq1018	0	0	0	0	0	33	k__Bacteria	p__Proteobacteria	c__Deltaproteobacteria	o__Syntrophobacterales	f__Syntrophobacteraceae	g__	s__
seq1019	0	0	0	0	0	33	k__Bacteria	p__Actinobacteria	c__Actinobacteria	o__Actinomycetales	f__Microbacteriaceae
seq1020	0	0	0	0	0	33	k__Bacteria	p__Proteobacteria	c__Betaproteobacteria	o__Burkholderiales	f__Oxalobacteraceae	g__	s__
seq1021	0	0	0	0	0	33	k__Bacteria	p__Actinobacteria	c__Actinobacteria	o__Actinomycetales	f__Intrasporangiaceae	g__	s__
seq1022	17	0	0	15	0	0	k__Bacteria	p__Actinobacteria	c__Actinobacteria	o__Actinomycetales	f__Intrasporangiaceae	g__Terracoccus	s__
seq1023	19	0	0	13	0	0	k__Bacteria	p__Actinobacteria	c__Acidimicrobiia	o__Acidimicrobiales	f__	g__	s__
seq1024	32	0	0	0	0	0	k__Bacteria	p__Proteobacteria	c__Gammaproteobacteria	o__Xanthomonadales	f__Sinobacteraceae	g__	s__
seq1025	10	0	0	0	0	22	k__Bacteria	p__Proteobacteria	c__Alphaproteobacteria	o__Caulobacterales	f__Caulobacteraceae	g__Mycoplana	s__
seq1026	9	12	11	0	0	0	k__Bacteria	p__Proteobacteria	c__Deltaproteobacteria	o__Syntrophobacterales	f__Syntrophaceae	g__Syntrophus	s__
seq1027	10	13	9	0	0	0	k__Bacteria	p__Proteobacteria	c__Gammaproteobacteria	o__Pseudomonadales	f__Pseudomonadaceae	g__Pseudomonas	s__alcaligenes
seq1028	8	10	14	0	0	0	k__Bacteria	p__Actinobacteria	c__Thermoleophilia	o__Gaiellales	f__	g__	s__
seq1029	8	24	0	0	0	0	k__Bacteria	p__Actinobacteria	c__OPB41	o__	f__	g__	s__
seq1030	19	0	0	13	0	0	k__Bacteria	p__Actinobacteria	c__Actinobacteria	o__Actinomycetales
seq1031	0	16	16	0	0	0	k__Bacteria	p__Chloroflexi	c__Anaerolineae	o__SJA-15	f__	g__	s__
seq1032	0	3	0	0	0	29	k__Bacteria	p__Gemmatimonadetes	c__Gemmatimonadetes	o__	f__	g__	s__
seq1033	0	4	10	0	5	13	k__Bacteria	p__Nitrospirae	c__Nitrospira	o__Nitrospirales	f__Nitrospiraceae	g__	s__
seq1034	0	0	19	0	13	0	k__Bacteria	p__Proteobacteria	c__Gammaproteobacteria	o__Oceanospirillales	f__	g__	s__
seq1035	0	0	6	0	0	26	k__Bacteria	p__Chloroflexi	c__Chloroflexi	o__[Roseiflexales]	f__	g__	s__
seq1036	0	0	32	0	0	0	k__Bacteria	p__Actinobacteria	c__Thermoleophilia	o__Gaiellales	f__Gaiellaceae	g__	s__
seq1037	0	0	0	32	0	0	k__Bacteria	p__Actinobacteria	c__Actinobacteria	o__Actinomycetales	f__Streptosporangiaceae	g__Nonomuraea	s__
seq1038	0	0	0	32	0	0	k__Bacteria	p__Firmicutes	c__Bacilli	o__Bacillales	f__Bacillaceae	g__Bacillus
seq1039	0	0	0	13	19	0	k__Bacteria	p__Proteobacteria	c__Betaproteobacteria	o__Burkholderiales
seq1040	0	0	0	7	10	15	k__Bacteria	p__Bacteroidetes	c__[Saprospirae]	o__[Saprospirales]	f__Chitinophagaceae	g__Flavisolibacter	s__
seq1041	0	0	0	0	32	0	k__Bacteria	p__Actinobacteria	c__Actinobacteria	o__Actinomycetales	f__Pseudonocardiaceae	g__Saccharopolyspora	s__
seq1042	0	0	0	0	32	0	k__Bacteria	p__Firmicutes	c__Bacilli	o__Bacillales	f__Bacillaceae
seq1043	0	0	0	0	32	0	k__Bacteria	p__Cyanobacteria	c__Chloroplast	o__Streptophyta	f__	g__	s__
seq1044	0	0	0	0	32	0	k__Bacteria	p__Firmicutes	c__Bacilli	o__Bacillales	f__Planococcaceae
seq1045	0	0	0	0	32	0	k__Bacteria	p__Proteobacteria	c__Betaproteobacteria	o__Burkholderiales	f__Comamonadaceae	g__Variovorax
seq1046	0	0	0	0	32	0	k__Bacteria	p__Actinobacteria	c__Actinobacteria	o__Actinomycetales	f__Cellulomonadaceae	g__Actinotalea	s__
seq1047	0	0	0	0	0	32	k__Bacteria	p__Firmicutes	c__Bacilli	o__Bacillales	f__Planococcaceae	g__Planomicrobium	s__
seq1048	0	0	0	0	0	32	k__Bacteria	p__Actinobacteria	c__MB-A2-108	o__0319-7L14	f__	g__	s__
seq1049	0	0	0	0	0	32	k__Bacteria	p__Actinobacteria	c__Thermoleophilia	o__Gaiellales	f__Gaiellaceae	g__	s__
seq1050	25	0	0	6	0	0	k__Bacteria	p__Proteobacteria	c__Deltaproteobacteria	o__Syntrophobacterales	f__Syntrophobacteraceae	g__	s__
seq1051	31	0	0	0	0	0	k__Bacteria	p__Actinobacteria	c__Acidimicrobiia	o__Acidimicrobiales	f__EB1017	g__	s__
seq1052	21	10	0	0	0	0	k__Bacteria	p__Proteobacteria	c__Gammaproteobacteria	o__HOC36	f__	g__	s__
seq1053	8	9	14	0	0	0	k__Bacteria	p__Proteobacteria	c__Betaproteobacteria	o__Rhodocyclales	f__Rhodocyclaceae	g__	s__
seq1054	7	11	13	0	0	0	k__Bacteria	p__Proteobacteria	c__Gammaproteobacteria	o__Pseudomonadales	f__Moraxellaceae	g__Acinetobacter	s__
seq1055	13	9	0	9	0	0	k__Bacteria	p__Proteobacteria	c__Alphaproteobacteria	o__Ellin329	f__	g__	s__
seq1056	31	0	0	0	0	0	k__Bacteria	p__Actinobacteria	c__Thermoleophilia	o__Gaiellales	f__Gaiellaceae	g__	s__
seq1057	8	14	9	0	0	0	k__Bacteria	p__Chloroflexi	c__Anaerolineae	o__Anaerolineales	f__Anaerolinaceae	g__Anaerolinea	s__
seq1058	6	0	9	3	13	0	k__Bacteria	p__Proteobacteria	c__Alphaproteobacteria	o__Sphingomonadales	f__Sphingomonadaceae
seq1059	5	19	7	0	0	0	k__Bacteria	p__Proteobacteria	c__Gammaproteobacteria	o__Xanthomonadales	f__Xanthomonadaceae	g__	s__
seq1060	3	4	0	0	9	15	k__Bacteria	p__Proteobacteria	c__Alphaproteobacteria	o__Rhizobiales	f__	g__	s__
seq1061	17	0	14	0	0	0	k__Bacteria	p__Proteobacteria	c__Betaproteobacteria	o__Rhodocyclales	f__Rhodocyclaceae	g__Dechloromonas	s__
seq1062	0	12	9	0	10	0	k__Bacteria	p__Proteobacteria	c__Alphaproteobacteria	o__Rhodospirillales	f__Rhodospirillaceae	g__	s__
seq1063	0	17	8	0	6	0	k__Bacteria	p__Actinobacteria	c__MB-A2-108	o__0319-7L14	f__	g__	s__
seq1064	0	18	13	0	0	0	k__Bacteria	p__Proteobacteria	c__Gammaproteobacteria
seq1065	0	31	0	0	0	0	k__Bacteria	p__Actinobacteria	c__Thermoleophilia	o__Gaiellales	f__Gaiellaceae	g__	s__
seq1066	0	31	0	0	0	0	k__Bacteria	p__Actinobacteria	c__Thermoleophilia	o__Gaiellales	f__Gaiellaceae	g__	s__
seq1067	0	31	0	0	0	0	k__Bacteria	p__Actinobacteria	c__Thermoleophilia	o__Solirubrobacterales	f__Conexibacteraceae	g__	s__
seq1068	0	0	0	20	7	4	k__Bacteria	p__Actinobacteria	c__Actinobacteria	o__Actinomycetales
seq1069	0	0	0	19	12	0	k__Bacteria	p__Actinobacteria	c__Acidimicrobiia	o__Acidimicrobiales	f__	g__	s__
seq1070	0	0	0	31	0	0	k__Bacteria	p__Firmicutes	c__Bacilli	o__Bacillales	f__Bacillaceae	g__	s__
seq1071	0	0	0	11	0	20	k__Bacteria	p__Firmicutes	c__Bacilli	o__Bacillales	f__Bacillaceae	g__Bacillus
seq1072	0	0	0	7	24	0	k__Archaea	p__Euryarchaeota	c__Halobacteria	o__Halobacteriales	f__Halobacteriaceae	g__Natronococcus	s__
seq1073	0	0	0	7	24	0	k__Bacteria	p__Cyanobacteria	c__Chloroplast	o__Streptophyta	f__	g__	s__
seq1074	0	0	0	10	13	8	k__Bacteria	p__Proteobacteria	c__Alphaproteobacteria	o__Rhizobiales	f__Bradyrhizobiaceae	g__Balneimonas	s__
seq1075	0	0	0	10	13	8	k__Bacteria	p__Proteobacteria	c__Alphaproteobacteria	o__Rhizobiales	f__Phyllobacteriaceae	g__	s__
seq1076	0	0	0	0	31	0	k__Bacteria	p__Firmicutes	c__Bacilli	o__Bacillales	f__Bacillaceae	g__Bacillus
seq1077	0	0	0	0	31	0	k__Bacteria	p__Chloroflexi	c__Chloroflexi	o__AKIW781	f__	g__	s__
seq1078	0	0	0	0	16	15	k__Bacteria	p__Firmicutes	c__Bacilli	o__Bacillales
seq1079	0	0	0	0	31	0	k__Bacteria	p__Firmicutes	c__Bacilli	o__Bacillales	f__Paenibacillaceae	g__	s__
seq1080	0	0	0	0	31	0	k__Bacteria	p__Firmicutes	c__Bacilli	o__Bacillales	f__Bacillaceae	g__Bacillus
seq1081	0	0	0	0	7	24	k__Bacteria	p__Actinobacteria	c__Actinobacteria	o__Actinomycetales	f__Nocardioidaceae	g__	s__
seq1082	0	0	0	0	31	0	k__Bacteria	p__Actinobacteria	c__Actinobacteria	o__Actinomycetales
seq1083	0	0	0	0	15	16	k__Bacteria	p__Firmicutes	c__Bacilli	o__Bacillales	f__Bacillaceae	g__Bacillus
seq1084	0	0	0	0	31	0	k__Bacteria	p__Proteobacteria	c__Gammaproteobacteria	o__Oceanospirillales	f__	g__	s__
seq1085	0	0	0	0	11	20	k__Bacteria	p__Actinobacteria	c__Rubrobacteria	o__Rubrobacterales	f__Rubrobacteraceae	g__Rubrobacter	s__
seq1086	0	0	0	0	0	31	k__Bacteria	p__Actinobacteria	c__Thermoleophilia	o__Gaiellales	f__Gaiellaceae	g__	s__
seq1087	0	0	0	0	0	31	k__Bacteria	p__Proteobacteria	c__Betaproteobacteria	o__Burkholderiales
seq1088	10	0	0	10	0	10	k__Bacteria	p__Firmicutes	c__Clostridia	o__Clostridiales	f__Veillonellaceae
seq1089	7	0	0	18	5	0	k__Bacteria	p__Proteobacteria	c__Alphaproteobacteria	o__Rhodospirillales	f__Rhodospirillaceae
seq1090	30	0	0	0	0	0	k__Bacteria	p__Acidobacteria	c__Solibacteres	o__Solibacterales	f__Solibacteraceae	g__Candidatus Solibacter	s__
seq1091	11	0	0	0	19	0	k__Bacteria	p__Actinobacteria	c__Thermoleophilia	o__Gaiellales	f__	g__	s__
seq1092	2	0	0	8	4	16	k__Bacteria	p__Chloroflexi	c__Chloroflexi	o__Herpetosiphonales	f__	g__	s__
seq1093	30	0	0	0	0	0	k__Bacteria	p__Proteobacteria	c__Deltaproteobacteria	o__Syntrophobacterales	f__Syntrophobacteraceae	g__	s__
seq1094	18	0	0	12	0	0	k__Bacteria	p__AD3	c__ABS-6	o__	f__	g__	s__
seq1095	15	15	0	0	0	0	k__Bacteria	p__Actinobacteria	c__Acidimicrobiia	o__Acidimicrobiales	f__EB1017	g__	s__
seq1096	16	0	0	14	0	0	k__Bacteria	p__Proteobacteria	c__Alphaproteobacteria	o__Rhizobiales	f__Hyphomicrobiaceae	g__Rhodoplanes	s__
seq1097	30	0	0	0	0	0	k__Bacteria	p__Actinobacteria	c__Actinobacteria	o__Actinomycetales
seq1098	30	0	0	0	0	0	k__Bacteria	p__Actinobacteria	c__Thermoleophilia	o__Solirubrobacterales	f__Conexibacteraceae	g__	s__
seq1099	30	0	0	0	0	0	k__Bacteria	p__Proteobacteria	c__Alphaproteobacteria	o__Rhizobiales	f__Hyphomicrobiaceae	g__Rhodoplanes	s__
seq1100	4	0	0	17	9	0	k__Bacteria	p__Actinobacteria	c__Actinobacteria	o__Actinomycetales	f__Streptosporangiaceae
seq1101	0	19	0	0	11	0	k__Bacteria	p__Actinobacteria	c__MB-A2-108	o__0319-7L14	f__	g__	s__
seq1102	0	14	16	0	0	0	k__Bacteria	p__Proteobacteria	c__Alphaproteobacteria	o__Caulobacterales	f__Caulobacteraceae	g__	s__
seq1103	0	17	0	13	0	0	k__Bacteria	p__Firmicutes	c__Clostridia	o__Clostridiales	f__Lachnospiraceae	g__	s__
seq1104	0	30	0	0	0	0	k__Bacteria	p__Actinobacteria	c__Thermoleophilia	o__	f__	g__	s__
seq1105	0	0	20	0	10	0	k__Bacteria	p__Proteobacteria	c__Gammaproteobacteria	o__Vibrionales	f__Vibrionaceae	g__Vibrio	s__
seq1106	0	0	23	0	7	0	k__Bacteria	p__Proteobacteria	c__Deltaproteobacteria	o__Desulfuromonadales	f__Geobacteraceae	g__Geobacter	s__
seq1107	0	0	6	0	24	0	k__Bacteria	p__Proteobacteria	c__Gammaproteobacteria	o__Pseudomonadales	f__Pseudomonadaceae
seq1108	0	0	7	0	0	23	k__Bacteria	p__Proteobacteria	c__Gammaproteobacteria
seq1109	0	0	30	0	0	0	k__Bacteria	p__Acidobacteria	c__Acidobacteria-6	o__iii1-15	f__	g__	s__
seq1110	0	0	0	30	0	0	k__Bacteria	p__AD3	c__ABS-6	o__	f__	g__	s__
seq1111	0	0	0	11	0	19	k__Bacteria	p__Firmicutes	c__Bacilli	o__Bacillales	f__Bacillaceae
seq1112	0	0	0	30	0	0	k__Bacteria	p__Firmicutes	c__Bacilli	o__Bacillales	f__Planococcaceae	g__Lysinibacillus
seq1113	0	0	0	0	22	8	k__Bacteria	p__Firmicutes	c__Clostridia	o__Clostridiales	f__Peptostreptococcaceae	g__Tepidibacter	s__
seq1114	0	0	0	0	11	19	k__Bacteria	p__Firmicutes	c__Bacilli	o__Bacillales	f__Bacillaceae	g__Anoxybacillus	s__kestanbolensis
seq1115	0	0	0	0	30	0	k__Bacteria	p__Firmicutes	c__Bacilli	o__Bacillales	f__Bacillaceae	g__	s__
seq1116	0	0	0	0	30	0	k__Bacteria	p__Actinobacteria	c__Actinobacteria	o__Actinomycetales	f__Micrococcaceae	g__Microbispora	s__rosea
seq1117	0	0	0	0	0	30	k__Bacteria	p__Proteobacteria	c__Alphaproteobacteria	o__Rickettsiales	f__Rickettsiaceae	g__	s__
seq1118	0	0	0	0	0	30	k__Bacteria	p__Actinobacteria	c__Actinobacteria	o__Actinomycetales	f__Mycobacteriaceae	g__Mycobacterium	s__
seq1119	0	0	0	0	0	30	k__Bacteria	p__Firmicutes	c__Bacilli	o__Bacillales	f__Paenibacillaceae	g__Ammoniphilus	s__
seq1120	21	0	0	8	0	0	k__Bacteria	p__WPS-2	c__	o__	f__	g__	s__
seq1121	17	12	0	0	0	0	k__Bacteria	p__Actinobacteria	c__Coriobacteriia	o__Coriobacteriales	f__Coriobacteriaceae
seq1122	14	0	0	15	0	0	k__Bacteria	p__Actinobacteria	c__Actinobacteria	o__Actinomycetales
seq1123	5	8	7	0	0	9	k__Bacteria	p__Actinobacteria	c__Actinobacteria	o__Actinomycetales	f__Pseudonocardiaceae	g__Amycolatopsis	s__thermoflava
seq1124	29	0	0	0	0	0	k__Bacteria	p__Actinobacteria	c__Thermoleophilia	o__Gaiellales	f__Gaiellaceae	g__	s__
seq1125	11	0	0	18	0	0	k__Bacteria	p__Proteobacteria	c__Betaproteobacteria	o__Ellin6067	f__	g__	s__
seq1126	14	0	15	0	0	0	k__Bacteria	p__Actinobacteria	c__Actinobacteria	o__Actinomycetales	f__Propionibacteriaceae	g__	s__
seq1127	11	0	18	0	0	0	k__Bacteria	p__Proteobacteria	c__Gammaproteobacteria
seq1128	0	29	0	0	0	0	k__Bacteria	p__Proteobacteria	c__Gammaproteobacteria
seq1129	0	29	0	0	0	0	k__Bacteria	p__Acidobacteria	c__Acidobacteria-5	o__	f__	g__	s__
seq1130	0	29	0	0	0	0	k__Bacteria	p__Acidobacteria	c__[Chloracidobacteria]	o__RB41	f__	g__	s__
seq1131	0	29	0	0	0	0	k__Bacteria	p__Actinobacteria	c__Thermoleophilia	o__Solirubrobacterales	f__	g__	s__
seq1132	0	10	14	0	0	5	k__Bacteria	p__Actinobacteria	c__Acidimicrobiia	o__Acidimicrobiales	f__EB1017	g__	s__
seq1133	0	0	12	0	10	7	k__Bacteria	p__Caldithrix	c__Caldithrixae	o__Caldithrixales	f__BA059	g__	s__
seq1134	0	0	29	0	0	0	k__Bacteria	p__Bacteroidetes	c__Bacteroidia	o__Bacteroidales	f__	g__	s__
seq1135	0	0	29	0	0	0	k__Bacteria	p__Proteobacteria	c__Alphaproteobacteria	o__Rhodospirillales	f__Rhodospirillaceae	g__	s__
seq1136	0	0	29	0	0	0	k__Bacteria	p__Proteobacteria	c__Betaproteobacteria	o__Burkholderiales	f__Comamonadaceae
seq1137	0	0	11	0	9	9	k__Bacteria	p__Proteobacteria	c__Alphaproteobacteria	o__Rhodobacterales	f__Rhodobacteraceae
seq1138	0	0	18	0	11	0	k__Bacteria	p__Proteobacteria	c__Alphaproteobacteria	o__Rhodobacterales	f__Rhodobacteraceae
seq1139	0	0	29	0	0	0	k__Bacteria	p__Actinobacteria	c__Actinobacteria	o__Actinomycetales	f__Micromonosporaceae	g__	s__
seq1140	0	0	0	14	7	8	k__Bacteria	p__Bacteroidetes	c__[Rhodothermi]	o__[Rhodothermales]	f__Rhodothermaceae	g__	s__
seq1141	0	0	0	14	5	10	k__Bacteria	p__Actinobacteria	c__Acidimicrobiia	o__Acidimicrobiales	f__AKIW874	g__	s__
seq1142	0	0	0	29	0	0	k__Bacteria	p__Proteobacteria	c__Alphaproteobacteria	o__Rhodospirillales	f__Rhodospirillaceae	g__Skermanella	s__
seq1143	0	0	0	9	8	12	k__Bacteria	p__Gemmatimonadetes	c__Gemm-3	o__	f__	g__	s__
seq1144	0	0	0	8	15	6	k__Bacteria	p__Firmicutes	c__Bacilli	o__Bacillales	f__Bacillaceae
seq1145	0	0	0	9	0	20	k__Bacteria	p__Proteobacteria	c__Betaproteobacteria	o__Burkholderiales	f__Comamonadaceae
seq1146	0	0	0	29	0	0	k__Bacteria	p__Actinobacteria	c__Actinobacteria	o__Actinomycetales	f__Intrasporangiaceae
seq1147	0	0	0	18	11	0	k__Bacteria	p__Cyanobacteria	c__Chloroplast	o__Streptophyta	f__	g__	s__
seq1148	0	0	0	13	0	16	k__Bacteria	p__Proteobacteria	c__Gammaproteobacteria	o__Enterobacteriales	f__Enterobacteriaceae
seq1149	0	0	0	6	13	10	k__Bacteria	p__Actinobacteria	c__Acidimicrobiia	o__Acidimicrobiales	f__	g__	s__
seq1150	0	0	0	0	29	0	k__Bacteria	p__Firmicutes	c__Bacilli	o__Bacillales	f__Bacillaceae	g__Piscibacillus	s__salipiscarius
seq1151	0	0	0	0	29	0	k__Bacteria	p__Proteobacteria	c__Deltaproteobacteria	o__Myxococcales	f__Haliangiaceae	g__	s__
seq1152	0	0	0	0	29	0	k__Bacteria	p__Proteobacteria	c__Betaproteobacteria	o__Burkholderiales	f__Oxalobacteraceae	g__	s__
seq1153	0	0	0	0	16	13	k__Bacteria	p__Gemmatimonadetes	c__Gemm-3	o__	f__	g__	s__
seq1154	0	0	0	0	29	0	k__Bacteria	p__Firmicutes	c__Bacilli	o__Bacillales	f__Planococcaceae
seq1155	0	0	0	0	11	18	k__Bacteria	p__Actinobacteria	c__Actinobacteria	o__Actinomycetales	f__Pseudonocardiaceae	g__Saccharomonospora	s__
seq1156	0	0	0	0	29	0	k__Bacteria	p__Acidobacteria	c__Acidobacteria-6	o__iii1-15	f__	g__	s__
seq1157	0	0	0	0	29	0	k__Bacteria	p__Proteobacteria	c__Gammaproteobacteria	o__Enterobacteriales	f__Enterobacteriaceae
seq1158	0	0	0	0	0	29	k__Bacteria	p__Actinobacteria	c__Thermoleophilia	o__Gaiellales	f__Gaiellaceae	g__	s__
seq1159	0	0	0	0	0	29	k__Bacteria	p__Chloroflexi	c__Ellin6529	o__	f__	g__	s__
seq1160	0	0	0	0	0	29	k__Bacteria	p__Actinobacteria	c__Actinobacteria	o__Actinomycetales	f__Kineosporiaceae	g__	s__
seq1161	0	0	0	0	0	29	k__Bacteria	p__Actinobacteria	c__Actinobacteria	o__Actinomycetales	f__Streptomycetaceae	g__Streptomyces	s__
seq1162	0	0	0	0	0	29	k__Bacteria	p__Firmicutes	c__Bacilli	o__Bacillales	f__Planococcaceae	g__Planomicrobium	s__
seq1163	0	0	0	0	0	29	k__Bacteria	p__Actinobacteria	c__Actinobacteria	o__Actinomycetales	f__Streptomycetaceae	g__Streptomyces	s__
seq1164	13	0	15	0	0	0	k__Bacteria	p__Proteobacteria	c__Deltaproteobacteria	o__	f__	g__	s__
seq1165	16	0	0	0	0	12	k__Bacteria	p__Actinobacteria	c__Actinobacteria	o__Actinomycetales	f__Thermomonosporaceae
seq1166	14	0	0	14	0	0	k__Bacteria	p__Acidobacteria	c__Acidobacteriia	o__Acidobacteriales	f__Acidobacteriaceae	g__	s__
seq1167	15	0	0	0	0	13	k__Bacteria	p__Gemmatimonadetes	c__Gemm-1	o__	f__	g__	s__
seq1168	9	6	13	0	0	0	k__Bacteria	p__Proteobacteria	c__Betaproteobacteria	o__Burkholderiales
seq1169	13	0	0	0	15	0	k__Bacteria	p__Proteobacteria	c__Alphaproteobacteria	o__Rhizobiales	f__Phyllobacteriaceae	g__Mesorhizobium	s__
seq1170	11	9	8	0	0	0	k__Bacteria	p__Proteobacteria	c__Deltaproteobacteria	o__Desulfobacterales	f__Desulfobacteraceae	g__Desulfotignum	s__
seq1171	28	0	0	0	0	0	k__Bacteria	p__Acidobacteria	c__Acidobacteriia	o__Acidobacteriales	f__Koribacteraceae	g__	s__
seq1172	2	0	6	6	11	3	k__Bacteria	p__Proteobacteria	c__Alphaproteobacteria	o__Rhizobiales	f__Xanthobacteraceae	g__Labrys	s__
seq1173	10	0	18	0	0	0	k__Bacteria	p__Proteobacteria	c__Gammaproteobacteria	o__HOC36	f__	g__	s__
seq1174	9	10	9	0	0	0	k__Bacteria	p__Acidobacteria	c__Acidobacteriia	o__Acidobacteriales	f__Koribacteraceae	g__Candidatus Koribacter	s__
seq1175	0	28	0	0	0	0	k__Bacteria	p__Proteobacteria	c__Deltaproteobacteria	o__Syntrophobacterales	f__Syntrophobacteraceae	g__	s__
seq1176	0	28	0	0	0	0	k__Bacteria	p__Chloroflexi	c__Ellin6529	o__	f__	g__	s__
seq1177	0	19	9	0	0	0	k__Bacteria	p__Proteobacteria	c__Betaproteobacteria	o__MND1	f__	g__	s__
seq1178	0	16	0	7	0	5	k__Bacteria	p__Actinobacteria	c__Acidimicrobiia	o__Acidimicrobiales	f__EB1017	g__	s__
seq1179	0	17	11	0	0	0	k__Bacteria	p__Proteobacteria	c__Deltaproteobacteria	o__Syntrophobacterales	f__Syntrophaceae	g__	s__
seq1180	0	28	0	0	0	0	k__Bacteria	p__Proteobacteria	c__Deltaproteobacteria	o__Syntrophobacterales	f__Syntrophobacteraceae	g__	s__
seq1181	0	13	11	4	0	0	k__Bacteria	p__Proteobacteria	c__Alphaproteobacteria	o__Rhodospirillales	f__Rhodospirillaceae	g__	s__
seq1182	0	28	0	0	0	0	k__Bacteria	p__Acidobacteria	c__Acidobacteria-6	o__iii1-15	f__	g__	s__
seq1183	0	28	0	0	0	0	k__Bacteria	p__Actinobacteria	c__Thermoleophilia	o__Gaiellales	f__Gaiellaceae	g__	s__
seq1184	0	11	17	0	0	0	k__Bacteria	p__Acidobacteria	c__iii1-8	o__SJA-36	f__	g__	s__
seq1185	0	12	16	0	0	0	k__Bacteria	p__Proteobacteria	c__Alphaproteobacteria	o__Rhodobacterales	f__Rhodobacteraceae	g__Rhodobacter	s__
seq1186	0	0	19	0	9	0	k__Bacteria	p__Proteobacteria	c__Deltaproteobacteria	o__Bdellovibrionales	f__Bacteriovoracaceae	g__	s__
seq1187	0	0	13	0	9	6	k__Bacteria	p__Proteobacteria	c__Alphaproteobacteria	o__Kiloniellales	f__Kiloniellaceae	g__Thalassospira	s__
seq1188	0	0	28	0	0	0	k__Bacteria	p__Proteobacteria	c__Betaproteobacteria	o__Ellin6067	f__	g__	s__
seq1189	0	0	7	0	8	13	k__Bacteria	p__Proteobacteria	c__Alphaproteobacteria	o__Rickettsiales	f__Rickettsiaceae	g__	s__
seq1190	0	0	13	0	15	0	k__Bacteria	p__Firmicutes	c__Clostridia	o__Clostridiales	f__Ruminococcaceae	g__Oscillospira	s__
seq1191	0	0	3	11	0	14	k__Bacteria	p__Actinobacteria	c__Acidimicrobiia	o__Acidimicrobiales	f__	g__	s__
seq1192	0	0	0	28	0	0	k__Bacteria	p__Firmicutes	c__Bacilli	o__Bacillales
seq1193	0	0	0	28	0	0	k__Bacteria	p__Actinobacteria	c__Actinobacteria	o__Actinomycetales
seq1194	0	0	0	11	6	11	k__Bacteria	p__Actinobacteria	c__Actinobacteria	o__Actinomycetales	f__Propionibacteriaceae	g__	s__
seq1195	0	0	0	7	21	0	k__Bacteria	p__Proteobacteria	c__Betaproteobacteria	o__Burkholderiales	f__Comamonadaceae
seq1196	0	0	0	28	0	0	k__Bacteria	p__Actinobacteria	c__Actinobacteria	o__Actinomycetales
seq1197	0	0	0	10	18	0	k__Bacteria	p__Actinobacteria	c__Actinobacteria	o__Actinomycetales	f__Mycobacteriaceae	g__Mycobacterium	s__
seq1198	0	0	0	28	0	0	k__Bacteria	p__Actinobacteria	c__Actinobacteria	o__Actinomycetales	f__Mycobacteriaceae	g__Mycobacterium	s__
seq1199	0	0	0	0	28	0	k__Bacteria	p__Proteobacteria	c__Gammaproteobacteria
seq1200	0	0	0	0	28	0	k__Bacteria	p__Bacteroidetes	c__Cytophagia	o__Cytophagales	f__Cytophagaceae	g__Pontibacter	s__
seq1201	0	0	0	0	28	0	k__Bacteria	p__Proteobacteria	c__Gammaproteobacteria
seq1202	0	0	0	0	28	0	k__Bacteria	p__Actinobacteria	c__Actinobacteria	o__Actinomycetales	f__Nocardioidaceae	g__	s__
seq1203	0	0	0	0	15	13	k__Bacteria	p__Actinobacteria	c__Thermoleophilia	o__Solirubrobacterales	f__Conexibacteraceae	g__	s__
seq1204	0	0	0	0	28	0	k__Bacteria	p__Acidobacteria	c__Acidobacteria-6	o__iii1-15	f__	g__	s__
seq1205	0	0	0	0	14	14	k__Bacteria	p__Bacteroidetes	c__Flavobacteriia	o__Flavobacteriales	f__Flavobacteriaceae	g__Salinimicrobium	s__
seq1206	0	0	0	0	28	0	k__Bacteria	p__Actinobacteria	c__Actinobacteria	o__Actinomycetales	f__Microbacteriaceae
seq1207	0	0	0	0	28	0	k__Bacteria	p__Cyanobacteria	c__Chloroplast	o__Streptophyta	f__	g__	s__
seq1208	0	0	0	0	0	28	k__Bacteria	p__Firmicutes	c__Clostridia	o__Clostridiales	f__Lachnospiraceae
seq1209	0	0	0	0	0	28	k__Bacteria	p__Proteobacteria	c__Alphaproteobacteria	o__Rhizobiales	f__Bradyrhizobiaceae	g__Balneimonas	s__
seq1210	11	4	12	0	0	0	k__Bacteria	p__Proteobacteria	c__Deltaproteobacteria	o__Myxococcales	f__	g__	s__
seq1211	13	0	0	14	0	0	k__Bacteria	p__Actinobacteria	c__Thermoleophilia	o__Gaiellales	f__Gaiellaceae	g__	s__
seq1212	7	14	6	0	0	0	k__Bacteria	p__Firmicutes	c__Clostridia	o__Clostridiales	f__Clostridiaceae	g__Caloramator	s__
seq1213	13	0	14	0	0	0	k__Bacteria	p__Proteobacteria	c__Deltaproteobacteria	o__Desulfobacterales	f__Desulfobacteraceae
seq1214	16	0	0	11	0	0	k__Bacteria	p__Nitrospirae	c__Nitrospira	o__Nitrospirales	f__0319-6A21	g__	s__
seq1215	9	0	18	0	0	0	k__Bacteria	p__Actinobacteria	c__Actinobacteria	o__Actinomycetales
seq1216	3	0	0	0	15	9	k__Bacteria	p__Firmicutes	c__Bacilli	o__Bacillales	f__Staphylococcaceae	g__Staphylococcus	s__
seq1217	2	25	0	0	0	0	k__Bacteria	p__Caldiserica	c__WCHB1-03	o__	f__	g__	s__
seq1218	12	0	0	15	0	0	k__Bacteria	p__Actinobacteria	c__Actinobacteria	o__Actinomycetales	f__Pseudonocardiaceae	g__Amycolatopsis	s__
seq1219	0	9	18	0	0	0	k__Bacteria	p__Proteobacteria	c__Betaproteobacteria	o__Thiobacterales	f__	g__	s__
seq1220	0	13	14	0	0	0	k__Bacteria	p__Acidobacteria	c__BPC102	o__MVS-40	f__	g__	s__
seq1221	0	15	12	0	0	0	k__Bacteria	p__Proteobacteria	c__Deltaproteobacteria	o__Syntrophobacterales	f__Syntrophobacteraceae	g__Syntrophobacter	s__
seq1222	0	3	0	0	17	7	k__Bacteria	p__Bacteroidetes	c__[Saprospirae]	o__[Saprospirales]	f__Chitinophagaceae	g__Flavisolibacter	s__
seq1223	0	27	0	0	0	0	k__Bacteria	p__Actinobacteria	c__Thermoleophilia	o__Solirubrobacterales	f__Solirubrobacteraceae	g__	s__
seq1224	0	6	5	0	9	7	k__Bacteria	p__Proteobacteria	c__Alphaproteobacteria	o__Rhizobiales	f__Rhizobiaceae	g__Rhizobium	s__
seq1225	0	27	0	0	0	0	k__Bacteria	p__Proteobacteria	c__Gammaproteobacteria	o__Xanthomonadales	f__Sinobacteraceae	g__	s__
seq1226	0	0	15	0	12	0	k__Bacteria	p__Proteobacteria	c__Alphaproteobacteria
seq1227	0	0	14	0	7	6	k__Bacteria	p__Proteobacteria	c__Deltaproteobacteria	o__GMD14H09	f__	g__	s__
seq1228	0	0	16	0	11	0	k__Bacteria	p__Firmicutes	c__Clostridia	o__Clostridiales	f__Peptostreptococcaceae	g__Clostridium	s__sticklandii
seq1229	0	0	13	0	0	14	k__Bacteria	p__Proteobacteria	c__Gammaproteobacteria	o__Vibrionales	f__Pseudoalteromonadaceae	g__Pseudoalteromonas	s__
seq1230	0	0	27	0	0	0	k__Bacteria	p__Acidobacteria	c__Acidobacteria-6	o__CCU21	f__	g__	s__
seq1231	0	0	18	0	9	0	k__Bacteria	p__Proteobacteria	c__Alphaproteobacteria	o__Sphingomonadales	f__Sphingomonadaceae	g__	s__
seq1232	0	0	11	0	0	16	k__Bacteria	p__Actinobacteria	c__Actinobacteria	o__Actinomycetales
seq1233	0	0	0	16	0	11	k__Bacteria	p__Firmicutes	c__Bacilli	o__Bacillales	f__Paenibacillaceae	g__Paenibacillus	s__
seq1234	0	0	0	27	0	0	k__Bacteria	p__Actinobacteria	c__Rubrobacteria	o__Rubrobacterales	f__Rubrobacteraceae	g__Rubrobacter	s__
seq1235	0	0	0	14	13	0	k__Bacteria	p__Proteobacteria	c__Deltaproteobacteria	o__Myxococcales
seq1236	0	0	0	27	0	0	k__Bacteria	p__Bacteroidetes	c__Flavobacteriia	o__Flavobacteriales	f__Flavobacteriaceae
seq1237	0	0	0	27	0	0	k__Bacteria	p__Proteobacteria	c__Gammaproteobacteria	o__Pseudomonadales	f__Moraxellaceae	g__Acinetobacter	s__
seq1238	0	0	0	0	27	0	k__Bacteria	p__Proteobacteria	c__Alphaproteobacteria	o__Sphingomonadales	f__Sphingomonadaceae	g__Kaistobacter	s__
seq1239	0	0	0	0	27	0	k__Bacteria	p__Acidobacteria	c__Acidobacteriia	o__Acidobacteriales	f__Koribacteraceae	g__	s__
seq1240	0	0	0	0	27	0	k__Bacteria	p__Gemmatimonadetes	c__Gemm-3	o__	f__	g__	s__
seq1241	0	0	0	0	27	0	k__Bacteria	p__Firmicutes	c__Bacilli	o__Bacillales	f__Bacillaceae
seq1242	0	0	0	0	27	0	k__Bacteria	p__Firmicutes	c__Bacilli	o__Bacillales	f__Bacillaceae	g__Bacillus	s__
seq1243	0	0	0	0	27	0	k__Bacteria	p__Actinobacteria	c__Actinobacteria	o__Actinomycetales	f__Intrasporangiaceae
seq1244	0	0	0	0	27	0	k__Bacteria	p__Actinobacteria	c__Actinobacteria	o__Actinomycetales	f__Thermomonosporaceae	g__Actinomadura
seq1245	0	0	0	0	15	12	k__Bacteria	p__Proteobacteria	c__Alphaproteobacteria	o__Rhodobacterales	f__Rhodobacteraceae	g__Rubellimicrobium	s__
seq1246	0	0	0	0	27	0	k__Bacteria	p__Cyanobacteria	c__Chloroplast	o__Streptophyta	f__	g__	s__
seq1247	0	0	0	0	27	0	k__Bacteria	p__Proteobacteria	c__Betaproteobacteria	o__Burkholderiales	f__Oxalobacteraceae
seq1248	0	0	0	0	0	27	k__Bacteria	p__Proteobacteria	c__Alphaproteobacteria	o__Rhizobiales	f__Hyphomicrobiaceae	g__Rhodoplanes	s__
seq1249	0	0	0	0	0	27	k__Bacteria	p__Actinobacteria	c__Thermoleophilia	o__Solirubrobacterales	f__	g__	s__
seq1250	0	0	0	0	0	27	k__Bacteria	p__Firmicutes	c__Bacilli	o__Bacillales	f__Bacillaceae	g__Bacillus	s__
seq1251	14	12	0	0	0	0	k__Bacteria	p__Proteobacteria	c__Alphaproteobacteria	o__Rhodospirillales	f__Acetobacteraceae	g__	s__
seq1252	9	0	17	0	0	0	k__Bacteria	p__Proteobacteria	c__Betaproteobacteria	o__SC-I-84	f__	g__	s__
seq1253	4	9	13	0	0	0	k__Bacteria	p__Chlorobi	c__Ignavibacteria	o__Ignavibacteriales	f__Ignavibacteriaceae	g__	s__
seq1254	9	8	9	0	0	0	k__Bacteria	p__Acidobacteria	c__OS-K	o__	f__	g__	s__
seq1255	12	0	14	0	0	0	k__Bacteria	p__Firmicutes	c__Clostridia	o__Clostridiales	f__[Mogibacteriaceae]	g__Anaerovorax	s__
seq1256	15	0	11	0	0	0	k__Bacteria	p__Firmicutes	c__Clostridia	o__Clostridiales	f__Syntrophomonadaceae	g__Syntrophomonas	s__
seq1257	26	0	0	0	0	0	k__Bacteria	p__Actinobacteria	c__Actinobacteria	o__Actinomycetales
seq1258	13	0	0	13	0	0	k__Bacteria	p__Proteobacteria	c__Alphaproteobacteria	o__Rhizobiales	f__Beijerinckiaceae
seq1259	0	16	0	0	4	6	k__Bacteria	p__Proteobacteria	c__Gammaproteobacteria	o__Oceanospirillales	f__Oceanospirillaceae	g__Oleibacter	s__
seq1260	0	26	0	0	0	0	k__Bacteria	p__Actinobacteria	c__MB-A2-108	o__0319-7L14	f__	g__	s__
seq1261	0	26	0	0	0	0	k__Bacteria	p__Proteobacteria	c__Deltaproteobacteria	o__Syntrophobacterales	f__Syntrophobacteraceae	g__Syntrophobacter	s__
seq1262	0	26	0	0	0	0	k__Bacteria	p__Spirochaetes	c__[Leptospirae]	o__[Leptospirales]	f__Sediment-4	g__SJA-88	s__
seq1263	0	15	11	0	0	0	k__Bacteria	p__Proteobacteria	c__Betaproteobacteria	o__Burkholderiales	f__Burkholderiaceae	g__Burkholderia	s__
seq1264	0	3	8	0	15	0	k__Bacteria	p__Proteobacteria	c__Gammaproteobacteria	o__Salinisphaerales	f__Salinisphaeraceae	g__Salinisphaera	s__
seq1265	0	13	13	0	0	0	k__Bacteria	p__Chloroflexi	c__Anaerolineae	o__SHA-20	f__	g__	s__
seq1266	0	26	0	0	0	0	k__Bacteria	p__Proteobacteria	c__Betaproteobacteria	o__MND1	f__	g__	s__
seq1267	0	12	14	0	0	0	k__Bacteria	p__Proteobacteria	c__Betaproteobacteria	o__ASSO-13	f__	g__	s__
seq1268	0	15	0	0	0	11	k__Bacteria	p__Actinobacteria	c__Actinobacteria	o__Actinomycetales
seq1269	0	0	26	0	0	0	k__Bacteria	p__Acidobacteria	c__Acidobacteriia	o__Acidobacteriales	f__Koribacteraceae	g__	s__
seq1270	0	0	12	0	14	0	k__Bacteria	p__Bacteroidetes	c__Flavobacteriia	o__Flavobacteriales	f__	g__	s__
seq1271	0	0	26	0	0	0	k__Bacteria	p__Proteobacteria	c__Gammaproteobacteria	o__HOC36	f__	g__	s__
seq1272	0	0	8	0	8	10	k__Bacteria	p__Proteobacteria	c__Alphaproteobacteria	o__Rhodospirillales	f__	g__	s__
seq1273	0	0	9	17	0	0	k__Bacteria	p__Actinobacteria	c__MB-A2-108	o__0319-7L14	f__	g__	s__
seq1274	0	0	7	19	0	0	k__Bacteria	p__Nitrospirae	c__Nitrospira	o__Nitrospirales	f__0319-6A21	g__	s__
seq1275	0	0	8	0	10	8	k__Bacteria	p__Proteobacteria	c__Alphaproteobacteria	o__Rhizobiales	f__Methylobacteriaceae	g__	s__
seq1276	0	0	26	0	0	0	k__Bacteria	p__Actinobacteria	c__Thermoleophilia	o__Solirubrobacterales	f__Solirubrobacteraceae	g__	s__
seq1277	0	0	0	10	8	8	k__Bacteria	p__Proteobacteria	c__Betaproteobacteria	o__Burkholderiales	f__	g__	s__
seq1278	0	0	0	11	8	7	k__Bacteria	p__Actinobacteria	c__Actinobacteria	o__Actinomycetales	f__Nocardioidaceae	g__	s__
seq1279	0	0	0	11	0	15	k__Bacteria	p__Gemmatimonadetes	c__Gemm-3	o__	f__	g__	s__
seq1280	0	0	0	26	0	0	k__Bacteria	p__Proteobacteria	c__Alphaproteobacteria	o__Rhodobacterales	f__Rhodobacteraceae	g__Paracoccus	s__
seq1281	0	0	0	13	0	13	k__Bacteria	p__Proteobacteria	c__Alphaproteobacteria	o__Rhodospirillales	f__Acetobacteraceae	g__	s__
seq1282	0	0	0	18	8	0	k__Bacteria	p__Actinobacteria	c__Actinobacteria	o__Actinomycetales	f__Micromonosporaceae	g__Actinoplanes	s__
seq1283	0	0	0	26	0	0	k__Bacteria	p__Firmicutes	c__Bacilli	o__Bacillales	f__Bacillaceae	g__Bacillus	s__
seq1284	0	0	0	12	0	14	k__Bacteria	p__Cyanobacteria	c__Chloroplast	o__Streptophyta	f__	g__	s__
seq1285	0	0	0	6	12	8	k__Bacteria	p__Actinobacteria	c__Actinobacteria	o__Actinomycetales	f__Nocardiopsaceae
seq1286	0	0	0	6	20	0	k__Bacteria	p__Proteobacteria	c__Alphaproteobacteria	o__Rhodospirillales	f__Rhodospirillaceae
seq1287	0	0	0	0	26	0	k__Bacteria	p__Firmicutes	c__Bacilli	o__Bacillales	f__Planococcaceae
seq1288	0	0	0	0	26	0	k__Bacteria	p__Proteobacteria	c__Gammaproteobacteria	o__Enterobacteriales	f__Enterobacteriaceae
seq1289	0	0	0	0	26	0	k__Bacteria	p__Actinobacteria	c__Actinobacteria	o__Actinomycetales	f__Micromonosporaceae	g__	s__
seq1290	0	0	0	0	9	17	k__Bacteria	p__Firmicutes	c__Bacilli	o__Bacillales	f__Alicyclobacillaceae	g__Alicyclobacillus	s__
seq1291	0	0	0	0	13	13	k__Bacteria	p__Proteobacteria	c__Alphaproteobacteria	o__Sphingomonadales	f__Sphingomonadaceae	g__Novosphingobium	s__
seq1292	0	0	0	0	0	26	k__Bacteria	p__Actinobacteria	c__Actinobacteria	o__Actinomycetales	f__Glycomycetaceae	g__Glycomyces	s__
seq1293	0	0	0	0	0	26	k__Bacteria	p__Actinobacteria	c__Actinobacteria	o__Actinomycetales	f__Intrasporangiaceae	g__Phycicoccus	s__
seq1294	0	0	0	0	0	26	k__Bacteria	p__Proteobacteria
seq1295	0	0	0	0	0	26	k__Bacteria	p__Proteobacteria	c__Betaproteobacteria	o__Burkholderiales	f__Alcaligenaceae	g__	s__
seq1296	0	0	0	0	0	26	k__Bacteria	p__Proteobacteria	c__Deltaproteobacteria	o__Myxococcales
seq1297	0	0	0	0	0	26	k__Bacteria	p__Actinobacteria	c__Thermoleophilia	o__Solirubrobacterales	f__Solirubrobacteraceae	g__	s__
seq1298	0	0	0	0	0	26	k__Bacteria	p__Actinobacteria	c__Thermoleophilia	o__Gaiellales	f__Gaiellaceae	g__	s__
seq1299	0	0	0	0	0	26	k__Bacteria	p__Firmicutes	c__Bacilli	o__Bacillales	f__Bacillaceae
seq1300	0	0	0	0	0	26	k__Bacteria	p__Proteobacteria	c__Alphaproteobacteria	o__Rhodobacterales	f__Rhodobacteraceae	g__Paracoccus	s__
seq1301	25	0	0	0	0	0	k__Bacteria	p__Verrucomicrobia	c__[Spartobacteria]	o__[Chthoniobacterales]	f__[Chthoniobacteraceae]	g__DA101	s__
seq1302	14	11	0	0	0	0	k__Bacteria	p__Firmicutes	c__Clostridia	o__Clostridiales	f__Christensenellaceae	g__	s__
seq1303	10	0	15	0	0	0	k__Bacteria	p__Proteobacteria	c__Gammaproteobacteria	o__Chromatiales	f__Ectothiorhodospiraceae	g__	s__
seq1304	17	0	8	0	0	0	k__Bacteria	p__Actinobacteria	c__Thermoleophilia	o__Gaiellales	f__	g__	s__
seq1305	7	12	6	0	0	0	k__Bacteria	p__Actinobacteria	c__MB-A2-108	o__	f__	g__	s__
seq1306	15	0	0	10	0	0	k__Bacteria	p__Actinobacteria	c__Actinobacteria	o__Actinomycetales	f__	g__	s__
seq1307	10	0	15	0	0	0	k__Bacteria	p__Spirochaetes	c__[Leptospirae]	o__[Leptospirales]	f__Sediment-4	g__	s__
seq1308	6	7	12	0	0	0	k__Bacteria	p__Proteobacteria	c__Gammaproteobacteria	o__Aeromonadales	f__Aeromonadaceae
seq1309	25	0	0	0	0	0	k__Bacteria	p__Actinobacteria	c__Actinobacteria	o__Actinomycetales	f__Nocardioidaceae	g__	s__
seq1310	12	0	0	13	0	0	k__Bacteria	p__Actinobacteria	c__Actinobacteria	o__Actinomycetales	f__Frankiaceae	g__	s__
seq1311	5	2	8	0	0	10	k__Bacteria	p__Bacteroidetes	c__Sphingobacteriia	o__Sphingobacteriales	f__Sphingobacteriaceae	g__	s__
seq1312	0	25	0	0	0	0	k__Bacteria	p__AD3	c__ABS-6	o__	f__	g__	s__
seq1313	0	25	0	0	0	0	k__Bacteria	p__Acidobacteria	c__RB25	o__	f__	g__	s__
seq1314	0	14	11	0	0	0	k__Bacteria	p__Nitrospirae	c__Nitrospira	o__Nitrospirales	f__Nitrospiraceae	g__Nitrospira	s__
seq1315	0	13	10	2	0	0	k__Bacteria	p__Proteobacteria	c__Alphaproteobacteria	o__Rhodospirillales	f__Rhodospirillaceae	g__	s__
seq1316	0	2	7	0	9	7	k__Bacteria	p__Proteobacteria	c__Gammaproteobacteria	o__Alteromonadales	f__HTCC2188	g__	s__
seq1317	0	25	0	0	0	0	k__Bacteria	p__Actinobacteria	c__Thermoleophilia	o__Solirubrobacterales	f__	g__	s__
seq1318	0	3	0	0	15	7	k__Bacteria	p__Bacteroidetes	c__[Saprospirae]	o__[Saprospirales]	f__Chitinophagaceae
seq1319	0	13	12	0	0	0	k__Bacteria	p__Actinobacteria	c__Actinobacteria	o__Actinomycetales	f__Actinosynnemataceae	g__Kutzneria	s__
seq1320	0	25	0	0	0	0	k__Bacteria	p__Acidobacteria	c__Acidobacteria-5	o__	f__	g__	s__
seq1321	0	3	0	10	0	12	k__Bacteria	p__Actinobacteria	c__Acidimicrobiia	o__Acidimicrobiales	f__	g__	s__
seq1322	0	25	0	0	0	0	k__Bacteria	p__Acidobacteria	c__Solibacteres	o__Solibacterales	f__	g__	s__
seq1323	0	16	0	9	0	0	k__Bacteria	p__Acidobacteria	c__Acidobacteria-5	o__	f__	g__	s__
seq1324	0	6	12	0	7	0	k__Bacteria	p__Proteobacteria	c__Betaproteobacteria	o__SC-I-84	f__	g__	s__
seq1325	0	0	17	0	8	0	k__Bacteria	p__GN02	c__BD1-5	o__	f__	g__	s__
seq1326	0	0	14	0	0	11	k__Bacteria	p__Proteobacteria	c__Alphaproteobacteria	o__Rhodospirillales	f__Acetobacteraceae	g__	s__
seq1327	0	0	25	0	0	0	k__Bacteria	p__Acidobacteria	c__Acidobacteriia	o__Acidobacteriales	f__Koribacteraceae	g__Candidatus Koribacter	s__
seq1328	0	0	5	0	20	0	k__Bacteria	p__Proteobacteria	c__Gammaproteobacteria	o__Pseudomonadales	f__Moraxellaceae	g__Acinetobacter	s__
seq1329	0	0	0	25	0	0	k__Bacteria	p__Proteobacteria	c__Betaproteobacteria	o__Burkholderiales	f__Oxalobacteraceae
seq1330	0	0	0	13	0	12	k__Bacteria	p__Gemmatimonadetes	c__Gemm-3	o__	f__	g__	s__
seq1331	0	0	0	10	6	9	k__Bacteria	p__Proteobacteria	c__Alphaproteobacteria	o__Rhizobiales	f__Methylocystaceae	g__	s__
seq1332	0	0	0	9	16	0	k__Bacteria	p__Bacteroidetes	c__[Saprospirae]	o__[Saprospirales]	f__Chitinophagaceae	g__Flavisolibacter	s__
seq1333	0	0	0	4	12	9	k__Bacteria	p__Proteobacteria	c__Betaproteobacteria	o__Rhodocyclales	f__Rhodocyclaceae	g__Dechloromonas	s__
seq1334	0	0	0	25	0	0	k__Bacteria	p__Firmicutes	c__Bacilli	o__Bacillales	f__Planococcaceae	g__Solibacillus	s__
seq1335	0	0	0	5	9	11	k__Bacteria	p__Proteobacteria	c__Gammaproteobacteria	o__Xanthomonadales	f__Xanthomonadaceae	g__Luteimonas	s__
seq1336	0	0	0	10	15	0	k__Bacteria	p__Proteobacteria	c__Alphaproteobacteria	o__Rickettsiales	f__mitochondria
seq1337	0	0	0	7	13	5	k__Bacteria	p__Proteobacteria	c__Alphaproteobacteria	o__Rhizobiales	f__Bradyrhizobiaceae	g__Balneimonas	s__
seq1338	0	0	0	4	9	12	k__Bacteria	p__Chloroflexi	c__S085	o__	f__	g__	s__
seq1339	0	0	0	15	0	10	k__Bacteria	p__Proteobacteria	c__Gammaproteobacteria	o__Pseudomonadales	f__Pseudomonadaceae
seq1340	0	0	0	8	17	0	k__Bacteria	p__Proteobacteria	c__Betaproteobacteria	o__Burkholderiales
seq1341	0	0	0	8	17	0	k__Bacteria	p__Actinobacteria	c__Actinobacteria	o__Actinomycetales	f__Streptosporangiaceae
seq1342	0	0	0	0	11	14	k__Bacteria	p__Proteobacteria	c__Alphaproteobacteria	o__Rhodospirillales	f__Rhodospirillaceae
seq1343	0	0	0	0	25	0	k__Bacteria	p__Firmicutes	c__Bacilli	o__Bacillales	f__Alicyclobacillaceae	g__Alicyclobacillus	s__
seq1344	0	0	0	0	25	0	k__Bacteria	p__Firmicutes	c__Bacilli	o__Bacillales	f__Alicyclobacillaceae	g__Alicyclobacillus	s__
seq1345	0	0	0	0	25	0	k__Bacteria	p__Proteobacteria	c__Alphaproteobacteria	o__Caulobacterales	f__Caulobacteraceae	g__	s__
seq1346	0	0	0	0	25	0	k__Bacteria	p__Actinobacteria	c__Thermoleophilia	o__Gaiellales	f__Gaiellaceae	g__	s__
seq1347	0	0	0	0	11	14	k__Bacteria	p__Proteobacteria	c__Betaproteobacteria	o__Burkholderiales	f__Comamonadaceae	g__Paucibacter	s__
seq1348	0	0	0	0	25	0	k__Bacteria	p__Firmicutes	c__Bacilli	o__Bacillales
seq1349	0	0	0	0	16	9	k__Bacteria	p__Chloroflexi	c__TK10	o__B07_WMSP1	f__	g__	s__
seq1350	0	0	0	0	25	0	k__Bacteria	p__Cyanobacteria	c__Chloroplast	o__Streptophyta	f__	g__	s__
seq1351	0	0	0	0	0	25	k__Bacteria	p__Actinobacteria	c__Thermoleophilia	o__Gaiellales	f__Gaiellaceae	g__	s__
seq1352	0	0	0	0	0	25	k__Bacteria	p__Proteobacteria	c__Alphaproteobacteria	o__Rhodospirillales	f__Rhodospirillaceae	g__	s__
seq1353	0	0	0	0	0	25	k__Bacteria	p__Actinobacteria	c__Actinobacteria	o__Actinomycetales	f__Nocardioidaceae	g__	s__
seq1354	0	0	0	0	0	25	k__Bacteria	p__Firmicutes	c__Bacilli	o__Bacillales	f__Alicyclobacillaceae	g__Alicyclobacillus	s__
seq1355	0	0	0	0	0	25	k__Bacteria	p__Firmicutes	c__Bacilli	o__Bacillales	f__Bacillaceae	g__Bacillus	s__
seq1356	11	13	0	0	0	0	k__Bacteria	p__Proteobacteria	c__Deltaproteobacteria	o__Myxococcales
seq1357	24	0	0	0	0	0	k__Bacteria	p__Acidobacteria	c__Solibacteres	o__Solibacterales	f__Solibacteraceae	g__Candidatus Solibacter	s__
seq1358	24	0	0	0	0	0	k__Bacteria	p__Proteobacteria	c__Alphaproteobacteria	o__Rhizobiales
seq1359	7	10	7	0	0	0	k__Bacteria	p__Actinobacteria	c__Actinobacteria	o__Actinomycetales	f__	g__	s__
seq1360	8	0	0	16	0	0	k__Bacteria	p__Proteobacteria	c__Alphaproteobacteria	o__Rhodospirillales	f__Rhodospirillaceae	g__	s__
seq1361	24	0	0	0	0	0	k__Bacteria	p__Verrucomicrobia	c__[Spartobacteria]	o__[Chthoniobacterales]	f__[Chthoniobacteraceae]	g__DA101	s__
seq1362	11	0	13	0	0	0	k__Bacteria	p__Firmicutes	c__Bacilli	o__Bacillales	f__Planococcaceae	g__Planomicrobium	s__
seq1363	6	18	0	0	0	0	k__Bacteria	p__Spirochaetes	c__Spirochaetes	o__Spirochaetales	f__Spirochaetaceae	g__Treponema	s__
seq1364	0	24	0	0	0	0	k__Bacteria	p__Acidobacteria	c__DA052	o__Ellin6513	f__	g__	s__
seq1365	0	24	0	0	0	0	k__Bacteria	p__Proteobacteria	c__Alphaproteobacteria	o__Rhodospirillales	f__Rhodospirillaceae	g__	s__
seq1366	0	13	11	0	0	0	k__Bacteria	p__Proteobacteria	c__Alphaproteobacteria	o__Rhodobacterales	f__Rhodobacteraceae
seq1367	0	16	8	0	0	0	k__Bacteria	p__Proteobacteria	c__Betaproteobacteria	o__Rhodocyclales	f__Rhodocyclaceae	g__Dechloromonas	s__
seq1368	0	8	16	0	0	0	k__Bacteria	p__Firmicutes	c__Clostridia	o__Clostridiales	f__Clostridiaceae	g__Clostridium	s__perfringens
seq1369	0	24	0	0	0	0	k__Bacteria	p__Acidobacteria	c__Acidobacteria-6	o__iii1-15	f__	g__	s__
seq1370	0	24	0	0	0	0	k__Bacteria	p__Proteobacteria	c__Deltaproteobacteria	o__Syntrophobacterales	f__Syntrophaceae	g__Syntrophus	s__
seq1371	0	18	0	0	6	0	k__Bacteria	p__Chloroflexi	c__Ellin6529	o__	f__	g__	s__
seq1372	0	3	0	0	7	14	k__Bacteria	p__Firmicutes	c__Bacilli	o__Lactobacillales	f__Streptococcaceae	g__Lactococcus	s__
seq1373	0	10	14	0	0	0	k__Bacteria	p__Proteobacteria	c__Gammaproteobacteria	o__Chromatiales	f__	g__	s__
seq1374	0	0	24	0	0	0	k__Bacteria	p__Proteobacteria	c__Alphaproteobacteria	o__Rhizobiales
seq1375	0	0	10	0	6	8	k__Bacteria	p__Proteobacteria	c__Gammaproteobacteria	o__Alteromonadales	f__HTCC2188	g__HTCC	s__
seq1376	0	0	8	0	8	8	k__Bacteria	p__Proteobacteria	c__Gammaproteobacteria	o__HTCC2188	f__HTCC2089	g__	s__
seq1377	0	0	24	0	0	0	k__Bacteria	p__Chloroflexi	c__TK10	o__B07_WMSP1
seq1378	0	0	24	0	0	0	k__Bacteria	p__Proteobacteria	c__Betaproteobacteria	o__Burkholderiales	f__Comamonadaceae	g__Methylibium	s__
seq1379	0	0	14	0	10	0	k__Bacteria	p__Actinobacteria	c__Actinobacteria	o__Actinomycetales	f__Micromonosporaceae
seq1380	0	0	5	0	9	10	k__Bacteria	p__Proteobacteria	c__Gammaproteobacteria	o__[Marinicellales]	f__[Marinicellaceae]	g__	s__
seq1381	0	0	15	0	9	0	k__Bacteria	p__Proteobacteria	c__Betaproteobacteria	o__Rhodocyclales	f__Rhodocyclaceae	g__Azovibrio	s__
seq1382	0	0	24	0	0	0	k__Bacteria	p__Proteobacteria	c__Deltaproteobacteria	o__Syntrophobacterales	f__Syntrophobacteraceae	g__	s__
seq1383	0	0	24	0	0	0	k__Bacteria	p__Proteobacteria	c__Deltaproteobacteria	o__Syntrophobacterales	f__Syntrophobacteraceae	g__Syntrophobacter	s__
seq1384	0	0	0	24	0	0	k__Bacteria	p__Firmicutes	c__Bacilli	o__Bacillales	f__Planococcaceae	g__	s__
seq1385	0	0	0	13	0	11	k__Bacteria	p__Firmicutes	c__Clostridia	o__Clostridiales	f__Lachnospiraceae	g__Epulopiscium	s__
seq1386	0	0	0	10	6	8	k__Bacteria	p__Proteobacteria	c__Betaproteobacteria	o__Burkholderiales	f__Burkholderiaceae	g__Salinispora	s__tropica
seq1387	0	0	0	15	0	9	k__Bacteria	p__Proteobacteria	c__Alphaproteobacteria	o__Rhodospirillales	f__Rhodospirillaceae
seq1388	0	0	0	24	0	0	k__Bacteria	p__Proteobacteria	c__Alphaproteobacteria	o__Rhizobiales	f__Bradyrhizobiaceae	g__Balneimonas	s__
seq1389	0	0	0	24	0	0	k__Bacteria	p__Cyanobacteria	c__Chloroplast	o__Streptophyta	f__	g__	s__
seq1390	0	0	0	24	0	0	k__Bacteria	p__Firmicutes	c__Bacilli	o__Bacillales	f__Bacillaceae	g__Bacillus
seq1391	0	0	0	24	0	0	k__Bacteria	p__Proteobacteria	c__Betaproteobacteria	o__Burkholderiales	f__Oxalobacteraceae
seq1392	0	0	0	24	0	0	k__Bacteria	p__Firmicutes	c__Bacilli	o__Bacillales	f__Bacillaceae	g__Bacillus	s__
seq1393	0	0	0	0	24	0	k__Bacteria	p__Firmicutes	c__Bacilli	o__Bacillales	f__Bacillaceae	g__Bacillus
seq1394	0	0	0	0	12	12	k__Bacteria	p__Firmicutes	c__Bacilli	o__Bacillales	f__Bacillaceae	g__Bacillus	s__
seq1395	0	0	0	0	24	0	k__Bacteria	p__Firmicutes	c__Bacilli	o__Bacillales	f__Bacillaceae	g__Bacillus
seq1396	0	0	0	0	24	0	k__Bacteria	p__Proteobacteria	c__Betaproteobacteria	o__Burkholderiales	f__Comamonadaceae
seq1397	0	0	0	0	24	0	k__Bacteria	p__Proteobacteria	c__Alphaproteobacteria	o__Sphingomonadales	f__Sphingomonadaceae	g__Kaistobacter	s__
seq1398	0	0	0	0	7	17	k__Bacteria	p__Firmicutes	c__Bacilli	o__Bacillales	f__Bacillaceae	g__Bacillus
seq1399	0	0	0	0	24	0	k__Bacteria	p__Proteobacteria	c__Betaproteobacteria	o__Burkholderiales	f__Comamonadaceae
seq1400	0	0	0	0	24	0	k__Bacteria	p__Firmicutes	c__Bacilli	o__Bacillales	f__Paenibacillaceae	g__Ammoniphilus	s__
seq1401	0	0	0	0	12	12	k__Bacteria	p__Firmicutes	c__Bacilli	o__Bacillales	f__Paenibacillaceae	g__Brevibacillus	s__
seq1402	0	0	0	0	0	24	k__Bacteria	p__Acidobacteria	c__Acidobacteria-5	o__	f__	g__	s__
seq1403	0	0	0	0	0	24	k__Bacteria	p__Actinobacteria	c__Acidimicrobiia	o__Acidimicrobiales	f__	g__	s__
seq1404	0	0	0	0	0	24	k__Bacteria	p__Actinobacteria	c__Actinobacteria	o__Actinomycetales	f__Nocardioidaceae
seq1405	0	0	0	0	0	24	k__Bacteria	p__Actinobacteria	c__Actinobacteria	o__Actinomycetales	f__Nocardioidaceae	g__	s__
seq1406	0	0	0	0	0	24	k__Bacteria	p__Actinobacteria	c__Thermoleophilia	o__Solirubrobacterales	f__	g__	s__
seq1407	0	0	0	0	0	24	k__Bacteria	p__Actinobacteria	c__Thermoleophilia	o__Solirubrobacterales	f__Solirubrobacteraceae	g__	s__
seq1408	0	0	0	0	0	24	k__Bacteria	p__Actinobacteria	c__Actinobacteria	o__Actinomycetales	f__Streptomycetaceae	g__Streptomyces
seq1409	0	0	0	0	0	24	k__Bacteria	p__Actinobacteria	c__Actinobacteria	o__Actinomycetales	f__Mycobacteriaceae	g__Mycobacterium	s__
seq1410	0	0	0	0	0	24	k__Bacteria	p__Cyanobacteria	c__Chloroplast	o__Streptophyta	f__	g__	s__
seq1411	0	0	0	0	0	24	k__Bacteria	p__Actinobacteria	c__Actinobacteria	o__Actinomycetales	f__Sporichthyaceae	g__	s__
seq1412	23	0	0	0	0	0	k__Bacteria	p__Chloroflexi	c__TK10	o__B07_WMSP1	f__	g__	s__
seq1413	3	0	4	0	9	7	k__Bacteria	p__Bacteroidetes	c__[Saprospirae]	o__[Saprospirales]	f__Chitinophagaceae	g__	s__
seq1414	2	0	0	5	10	6	k__Bacteria	p__[Thermi]	c__Deinococci	o__Deinococcales	f__Deinococcaceae	g__Deinococcus	s__
seq1415	2	0	0	0	14	7	k__Bacteria	p__[Thermi]	c__Deinococci	o__Thermales	f__Thermaceae	g__Thermus	s__
seq1416	7	11	5	0	0	0	k__Bacteria	p__Bacteroidetes	c__Bacteroidia	o__Bacteroidales	f__	g__	s__
seq1417	8	15	0	0	0	0	k__Bacteria	p__Proteobacteria	c__Deltaproteobacteria	o__	f__	g__	s__
seq1418	23	0	0	0	0	0	k__Bacteria	p__Nitrospirae	c__Nitrospira	o__Nitrospirales	f__0319-6A21	g__	s__
seq1419	4	0	0	19	0	0	k__Bacteria	p__Proteobacteria	c__Gammaproteobacteria	o__Xanthomonadales	f__Sinobacteraceae	g__	s__
seq1420	9	8	6	0	0	0	k__Bacteria	p__Bacteroidetes	c__Bacteroidia	o__Bacteroidales	f__	g__	s__
seq1421	23	0	0	0	0	0	k__Bacteria	p__Gemmatimonadetes	c__Gemmatimonadetes	o__	f__	g__	s__
seq1422	0	23	0	0	0	0	k__Bacteria	p__Proteobacteria	c__Alphaproteobacteria	o__Rhodospirillales	f__Rhodospirillaceae	g__	s__
seq1423	0	17	0	6	0	0	k__Bacteria	p__Actinobacteria	c__Actinobacteria	o__Actinomycetales	f__Streptosporangiaceae	g__	s__
seq1424	0	7	6	0	10	0	k__Bacteria	p__Actinobacteria	c__Acidimicrobiia	o__Acidimicrobiales	f__C111	g__	s__
seq1425	0	15	8	0	0	0	k__Bacteria	p__Proteobacteria	c__Deltaproteobacteria	o__Desulfarculales	f__Desulfarculaceae	g__	s__
seq1426	0	23	0	0	0	0	k__Bacteria	p__Spirochaetes	c__[Leptospirae]	o__[Leptospirales]	f__Sediment-4	g__SJA-88	s__
seq1427	0	23	0	0	0	0	k__Bacteria	p__Proteobacteria	c__Alphaproteobacteria	o__Rhizobiales	f__Hyphomicrobiaceae	g__Rhodoplanes	s__
seq1428	0	16	0	0	7	0	k__Bacteria	p__Actinobacteria	c__Actinobacteria	o__Actinomycetales	f__Pseudonocardiaceae	g__Pseudonocardia	s__
seq1429	0	4	5	0	0	14	k__Bacteria	p__Proteobacteria	c__Alphaproteobacteria	o__Rhodospirillales	f__	g__	s__
seq1430	0	0	13	0	10	0	k__Bacteria	p__Proteobacteria	c__Gammaproteobacteria
seq1431	0	0	13	0	10	0	k__Bacteria	p__Proteobacteria	c__Alphaproteobacteria	o__Rickettsiales	f__Rickettsiaceae	g__	s__
seq1432	0	0	10	0	13	0	k__Bacteria	p__Proteobacteria	c__Alphaproteobacteria	o__Rhizobiales
seq1433	0	0	23	0	0	0	k__Bacteria	p__Actinobacteria	c__Acidimicrobiia	o__Acidimicrobiales	f__EB1017	g__	s__
seq1434	0	0	5	0	6	12	k__Bacteria	p__Caldithrix	c__Caldithrixae	o__Caldithrixales	f__BA059	g__	s__
seq1435	0	0	10	0	13	0	k__Bacteria	p__Proteobacteria	c__Alphaproteobacteria	o__Kiloniellales	f__Kiloniellaceae	g__Thalassospira	s__
seq1436	0	0	13	0	10	0	k__Bacteria	p__Proteobacteria	c__Alphaproteobacteria	o__Rhizobiales	f__Hyphomicrobiaceae	g__Rhodoplanes	s__
seq1437	0	0	23	0	0	0	k__Bacteria	p__Proteobacteria	c__Deltaproteobacteria	o__Syntrophobacterales	f__Syntrophorhabdaceae	g__	s__
seq1438	0	0	23	0	0	0	k__Bacteria	p__Actinobacteria	c__Actinobacteria	o__Actinomycetales
seq1439	0	0	10	0	0	13	k__Bacteria	p__Proteobacteria	c__Betaproteobacteria	o__	f__	g__	s__
seq1440	0	0	23	0	0	0	k__Bacteria	p__Proteobacteria	c__Betaproteobacteria	o__Nitrosomonadales	f__Nitrosomonadaceae	g__	s__
seq1441	0	0	0	23	0	0	k__Bacteria	p__Firmicutes	c__Bacilli	o__Bacillales	f__Bacillaceae
seq1442	0	0	0	23	0	0	k__Bacteria	p__Firmicutes	c__Bacilli	o__Bacillales	f__Bacillaceae	g__Bacillus
seq1443	0	0	0	13	10	0	k__Bacteria	p__Proteobacteria	c__Alphaproteobacteria	o__Rhizobiales	f__Phyllobacteriaceae	g__Mesorhizobium	s__
seq1444	0	0	0	8	7	8	k__Bacteria	p__Firmicutes	c__Bacilli	o__Bacillales
seq1445	0	0	0	23	0	0	k__Bacteria	p__Firmicutes	c__Clostridia	o__Clostridiales	f__Lachnospiraceae	g__	s__
seq1446	0	0	0	9	14	0	k__Bacteria	p__Proteobacteria	c__Alphaproteobacteria	o__Rhizobiales	f__Rhizobiaceae	g__Agrobacterium	s__
seq1447	0	0	0	5	18	0	k__Bacteria	p__Firmicutes	c__Bacilli	o__Bacillales	f__Bacillaceae	g__Bacillus
seq1448	0	0	0	10	0	13	k__Bacteria	p__Proteobacteria	c__Alphaproteobacteria	o__Rhizobiales	f__Rhizobiaceae	g__Agrobacterium	s__
seq1449	0	0	0	23	0	0	k__Bacteria	p__Bacteroidetes	c__Cytophagia	o__Cytophagales	f__Cytophagaceae	g__Pontibacter	s__
seq1450	0	0	0	0	23	0	k__Bacteria	p__Firmicutes	c__Bacilli	o__Bacillales
seq1451	0	0	0	0	19	4	k__Bacteria	p__Firmicutes	c__Bacilli	o__Lactobacillales	f__Streptococcaceae	g__Streptococcus	s__
seq1452	0	0	0	0	23	0	k__Bacteria	p__Actinobacteria	c__Actinobacteria	o__Actinomycetales	f__Kineosporiaceae	g__Kineococcus	s__
seq1453	0	0	0	0	11	12	k__Bacteria	p__Proteobacteria	c__Gammaproteobacteria	o__Xanthomonadales	f__Sinobacteraceae	g__	s__
seq1454	0	0	0	0	23	0	k__Bacteria	p__Actinobacteria	c__Thermoleophilia	o__Solirubrobacterales	f__Solirubrobacteraceae	g__	s__
seq1455	0	0	0	0	15	8	k__Bacteria	p__Proteobacteria	c__Betaproteobacteria	o__Burkholderiales	f__Oxalobacteraceae
seq1456	0	0	0	0	23	0	k__Bacteria	p__Actinobacteria	c__Actinobacteria	o__Actinomycetales	f__Micromonosporaceae
seq1457	0	0	0	0	6	17	k__Bacteria	p__Proteobacteria	c__Gammaproteobacteria	o__Alteromonadales	f__Alteromonadaceae	g__Cellvibrio	s__
seq1458	0	0	0	0	0	23	k__Bacteria	p__Actinobacteria	c__Actinobacteria	o__Actinomycetales	f__Micromonosporaceae	g__Pilimelia	s__
seq1459	0	0	0	0	0	23	k__Bacteria	p__Actinobacteria	c__Actinobacteria	o__Actinomycetales	f__Nocardioidaceae	g__	s__
seq1460	0	0	0	0	0	23	k__Bacteria	p__Acidobacteria	c__Acidobacteria-6	o__iii1-15	f__	g__	s__
seq1461	0	0	0	0	0	23	k__Bacteria	p__Proteobacteria	c__Deltaproteobacteria	o__Myxococcales	f__Myxococcaceae
seq1462	0	0	0	0	0	23	k__Bacteria	p__Actinobacteria	c__Actinobacteria	o__Actinomycetales	f__Nocardioidaceae	g__	s__
seq1463	0	0	0	0	0	23	k__Bacteria	p__Actinobacteria	c__MB-A2-108	o__0319-7L14	f__	g__	s__
seq1464	0	0	0	0	0	23	k__Bacteria	p__Actinobacteria	c__MB-A2-108	o__0319-7L14	f__	g__	s__
seq1465	0	0	0	0	0	23	k__Bacteria	p__Firmicutes	c__Bacilli	o__Bacillales	f__Bacillaceae	g__Bacillus	s__thermoamylovorans
seq1466	0	0	0	0	0	23	k__Bacteria	p__Proteobacteria	c__Alphaproteobacteria	o__Rhizobiales	f__Hyphomicrobiaceae	g__Pedomicrobium	s__
seq1467	9	0	0	13	0	0	k__Bacteria	p__Proteobacteria	c__Alphaproteobacteria	o__Rhodospirillales	f__Rhodospirillaceae	g__	s__
seq1468	10	8	4	0	0	0	k__Bacteria	p__Spirochaetes	c__[Leptospirae]	o__[Leptospirales]	f__Sediment-4	g__SJA-88	s__
seq1469	22	0	0	0	0	0	k__Bacteria	p__Proteobacteria	c__Deltaproteobacteria	o__Syntrophobacterales	f__Syntrophorhabdaceae	g__	s__
seq1470	13	9	0	0	0	0	k__Bacteria	p__Chloroflexi	c__Anaerolineae	o__Anaerolineales	f__Anaerolinaceae	g__T78	s__
seq1471	4	10	8	0	0	0	k__Bacteria	p__OP8	c__	o__	f__	g__	s__
seq1472	22	0	0	0	0	0	k__Bacteria	p__Actinobacteria	c__Thermoleophilia	o__Solirubrobacterales	f__Conexibacteraceae	g__Conexibacter	s__
seq1473	22	0	0	0	0	0	k__Bacteria	p__Acidobacteria	c__Acidobacteriia	o__Acidobacteriales	f__Koribacteraceae	g__	s__
seq1474	9	0	13	0	0	0	k__Bacteria	p__Chloroflexi	c__Ellin6529	o__	f__	g__	s__
seq1475	11	0	0	11	0	0	k__Bacteria	p__Actinobacteria	c__Actinobacteria	o__Micrococcales	f__	g__	s__
seq1476	4	5	0	13	0	0	k__Bacteria	p__Firmicutes	c__Bacilli	o__Bacillales	f__Paenibacillaceae
seq1477	6	16	0	0	0	0	k__Bacteria	p__Proteobacteria	c__Deltaproteobacteria	o__Desulfobacterales	f__Desulfobacteraceae	g__Desulfosarcina	s__
seq1478	9	6	7	0	0	0	k__Bacteria	p__Proteobacteria	c__Betaproteobacteria	o__SC-I-84	f__	g__	s__
seq1479	22	0	0	0	0	0	k__Bacteria	p__Acidobacteria	c__Acidobacteriia	o__Acidobacteriales	f__Koribacteraceae	g__Candidatus Koribacter	s__
seq1480	5	0	0	17	0	0	k__Bacteria	p__Proteobacteria	c__Deltaproteobacteria	o__Syntrophobacterales	f__Syntrophobacteraceae	g__	s__
seq1481	0	22	0	0	0	0	k__Bacteria	p__Verrucomicrobia	c__Verrucomicrobiae	o__Verrucomicrobiales	f__Verrucomicrobiaceae	g__	s__
seq1482	0	22	0	0	0	0	k__Bacteria	p__TM6	c__SJA-4	o__	f__	g__	s__
seq1483	0	22	0	0	0	0	k__Bacteria	p__Actinobacteria	c__Actinobacteria	o__Actinomycetales	f__Micromonosporaceae	g__	s__
seq1484	0	22	0	0	0	0	k__Bacteria	p__Actinobacteria	c__Actinobacteria	o__Actinomycetales	f__Propionibacteriaceae	g__	s__
seq1485	0	12	10	0	0	0	k__Bacteria	p__Chloroflexi	c__Anaerolineae	o__GCA004	f__	g__	s__
seq1486	0	22	0	0	0	0	k__Bacteria	p__Chloroflexi	c__TK10	o__B07_WMSP1
seq1487	0	8	14	0	0	0	k__Bacteria	p__Proteobacteria	c__Deltaproteobacteria	o__Myxococcales	f__	g__	s__
seq1488	0	22	0	0	0	0	k__Bacteria	p__Proteobacteria	c__Alphaproteobacteria	o__Rhizobiales
seq1489	0	22	0	0	0	0	k__Bacteria	p__Proteobacteria	c__Deltaproteobacteria	o__Syntrophobacterales	f__Syntrophobacteraceae	g__	s__
seq1490	0	5	0	12	5	0	k__Bacteria	p__Firmicutes	c__Bacilli	o__Bacillales	f__Planococcaceae	g__Planomicrobium	s__
seq1491	0	22	0	0	0	0	k__Bacteria	p__Proteobacteria	c__Betaproteobacteria	o__Burkholderiales	f__Oxalobacteraceae
seq1492	0	0	18	0	4	0	k__Bacteria	p__Chlorobi	c__OPB56	o__	f__	g__	s__
seq1493	0	0	14	0	5	3	k__Bacteria	p__Proteobacteria	c__Alphaproteobacteria	o__BD7-3	f__	g__	s__
seq1494	0	0	9	0	6	7	k__Bacteria	p__Proteobacteria	c__Betaproteobacteria	o__Rhodocyclales	f__Rhodocyclaceae
seq1495	0	0	14	2	6	0	k__Bacteria	p__Verrucomicrobia	c__[Pedosphaerae]	o__[Pedosphaerales]	f__Ellin515	g__	s__
seq1496	0	0	22	0	0	0	k__Bacteria	p__Actinobacteria	c__Actinobacteria	o__Actinomycetales
seq1497	0	0	4	0	5	13	k__Bacteria	p__Proteobacteria	c__Gammaproteobacteria	o__Oceanospirillales	f__	g__	s__
seq1498	0	0	7	0	7	8	k__Bacteria	p__Proteobacteria	c__Deltaproteobacteria	o__Myxococcales	f__	g__	s__
seq1499	0	0	22	0	0	0	k__Bacteria	p__Proteobacteria	c__Deltaproteobacteria	o__Desulfobacterales	f__Desulfobulbaceae	g__Desulfobulbus	s__
seq1500	0	0	14	0	8	0	k__Bacteria	p__Acidobacteria	c__Acidobacteriia	o__Acidobacteriales	f__Koribacteraceae	g__	s__
seq1501	0	0	22	0	0	0	k__Bacteria	p__Proteobacteria	c__Betaproteobacteria	o__Burkholderiales	f__Oxalobacteraceae
seq1502	0	0	11	0	11	0	k__Bacteria	p__Acidobacteria	c__Solibacteres	o__Solibacterales	f__Solibacteraceae	g__	s__
seq1503	0	0	22	0	0	0	k__Bacteria	p__Proteobacteria	c__Alphaproteobacteria	o__Rhizobiales	f__Hyphomicrobiaceae	g__Hyphomicrobium	s__
seq1504	0	0	13	0	9	0	k__Bacteria	p__Bacteroidetes	c__Cytophagia	o__Cytophagales	f__Cytophagaceae
seq1505	0	0	0	11	4	7	k__Bacteria	p__Firmicutes	c__Clostridia	o__Clostridiales	f__Clostridiaceae	g__Clostridium	s__perfringens
seq1506	0	0	0	11	11	0	k__Bacteria	p__Verrucomicrobia	c__Opitutae	o__Opitutales	f__Opitutaceae	g__Opitutus	s__
seq1507	0	0	0	22	0	0	k__Bacteria	p__Actinobacteria	c__Actinobacteria	o__Actinomycetales
seq1508	0	0	0	11	5	6	k__Bacteria	p__Proteobacteria	c__Betaproteobacteria	o__Burkholderiales	f__Comamonadaceae
seq1509	0	0	0	7	8	7	k__Bacteria	p__Actinobacteria	c__Actinobacteria	o__Actinomycetales	f__Nocardioidaceae	g__Actinopolymorpha	s__
seq1510	0	0	0	22	0	0	k__Bacteria	p__Actinobacteria	c__Actinobacteria	o__Actinomycetales	f__Microbacteriaceae	g__	s__
seq1511	0	0	0	9	0	13	k__Bacteria	p__Actinobacteria	c__Actinobacteria	o__Actinomycetales	f__Geodermatophilaceae
seq1512	0	0	0	0	22	0	k__Bacteria	p__Proteobacteria	c__Gammaproteobacteria	o__Xanthomonadales	f__Sinobacteraceae	g__Steroidobacter	s__
seq1513	0	0	0	0	22	0	k__Bacteria	p__Actinobacteria	c__Actinobacteria	o__Actinomycetales	f__Intrasporangiaceae	g__	s__
seq1514	0	0	0	0	9	13	k__Bacteria	p__Actinobacteria	c__MB-A2-108	o__0319-7L14	f__	g__	s__
seq1515	0	0	0	0	22	0	k__Bacteria	p__Firmicutes	c__Bacilli	o__Bacillales	f__Bacillaceae
seq1516	0	0	0	0	11	11	k__Bacteria	p__Bacteroidetes	c__[Saprospirae]	o__[Saprospirales]	f__Chitinophagaceae	g__Flavisolibacter	s__
seq1517	0	0	0	0	0	22	k__Bacteria	p__Chloroflexi	c__Chloroflexi	o__[Roseiflexales]	f__[Kouleothrixaceae]	g__	s__
seq1518	0	0	0	0	0	22	k__Bacteria	p__Actinobacteria	c__Acidimicrobiia	o__Acidimicrobiales	f__EB1017	g__	s__
seq1519	0	0	0	0	0	22	k__Bacteria	p__Firmicutes	c__Bacilli	o__Bacillales	f__Planococcaceae	g__Planomicrobium	s__
seq1520	0	0	0	0	0	22	k__Bacteria	p__Proteobacteria	c__Alphaproteobacteria	o__Rhodospirillales	f__Rhodospirillaceae	g__	s__
seq1521	0	0	0	0	0	22	k__Bacteria	p__Firmicutes	c__Bacilli	o__Bacillales	f__Bacillaceae	g__	s__
seq1522	0	0	0	0	0	22	k__Bacteria	p__Actinobacteria	c__Thermoleophilia	o__Gaiellales	f__Gaiellaceae	g__	s__
seq1523	0	0	0	0	0	22	k__Bacteria	p__Actinobacteria	c__Actinobacteria	o__Actinomycetales	f__Mycobacteriaceae	g__Mycobacterium
seq1524	0	0	0	0	0	22	k__Bacteria	p__Proteobacteria	c__Alphaproteobacteria	o__Caulobacterales	f__Caulobacteraceae	g__Phenylobacterium	s__
seq1525	13	0	0	8	0	0	k__Bacteria	p__Actinobacteria	c__Thermoleophilia	o__Solirubrobacterales
seq1526	11	0	0	10	0	0	k__Bacteria	p__Proteobacteria	c__Deltaproteobacteria	o__Syntrophobacterales	f__Syntrophobacteraceae	g__	s__
seq1527	21	0	0	0	0	0	k__Bacteria	p__Proteobacteria	c__Deltaproteobacteria	o__Syntrophobacterales	f__Syntrophobacteraceae	g__	s__
seq1528	7	6	8	0	0	0	k__Bacteria	p__Chloroflexi	c__Anaerolineae	o__Anaerolineales	f__Anaerolinaceae	g__	s__
seq1529	10	11	0	0	0	0	k__Bacteria	p__Firmicutes	c__Clostridia	o__Clostridiales
seq1530	7	9	5	0	0	0	k__Bacteria	p__Proteobacteria	c__Betaproteobacteria	o__SC-I-84	f__	g__	s__
seq1531	8	6	7	0	0	0	k__Bacteria	p__Chloroflexi	c__Anaerolineae	o__Anaerolineales	f__Anaerolinaceae	g__	s__
seq1532	13	8	0	0	0	0	k__Bacteria	p__Firmicutes	c__Bacilli	o__Bacillales	f__Bacillaceae	g__Bacillus	s__
seq1533	21	0	0	0	0	0	k__Bacteria	p__Acidobacteria	c__DA052	o__Ellin6513	f__	g__	s__
seq1534	3	0	0	11	0	7	k__Bacteria	p__Proteobacteria	c__Alphaproteobacteria	o__Rhodospirillales	f__Rhodospirillaceae
seq1535	21	0	0	0	0	0	k__Bacteria	p__Firmicutes	c__Clostridia	o__Clostridiales	f__Clostridiaceae
seq1536	10	0	11	0	0	0	k__Bacteria	p__Actinobacteria	c__Acidimicrobiia	o__Acidimicrobiales	f__EB1017	g__	s__
seq1537	21	0	0	0	0	0	k__Bacteria	p__Chloroflexi	c__Anaerolineae	o__Anaerolineales	f__Anaerolinaceae	g__WCHB1-05	s__
seq1538	10	0	0	11	0	0	k__Bacteria	p__Proteobacteria	c__Alphaproteobacteria	o__Rhodospirillales	f__Rhodospirillaceae	g__	s__
seq1539	21	0	0	0	0	0	k__Bacteria	p__Proteobacteria	c__Betaproteobacteria	o__Rhodocyclales	f__Rhodocyclaceae	g__Dechloromonas	s__
seq1540	8	0	13	0	0	0	k__Bacteria	p__Proteobacteria	c__Deltaproteobacteria	o__Syntrophobacterales	f__Syntrophorhabdaceae	g__	s__
seq1541	21	0	0	0	0	0	k__Bacteria	p__Proteobacteria	c__Gammaproteobacteria	o__Xanthomonadales	f__Sinobacteraceae	g__	s__
seq1542	0	21	0	0	0	0	k__Bacteria
seq1543	0	7	0	14	0	0	k__Bacteria	p__Bacteroidetes	c__Cytophagia	o__Cytophagales	f__Cytophagaceae	g__Adhaeribacter	s__
seq1544	0	21	0	0	0	0	k__Bacteria	p__Acidobacteria	c__Acidobacteriia	o__Acidobacteriales	f__Koribacteraceae	g__	s__
seq1545	0	21	0	0	0	0	k__Bacteria	p__Proteobacteria	c__Alphaproteobacteria	o__Rhizobiales	f__Hyphomicrobiaceae	g__Rhodoplanes	s__
seq1546	0	8	13	0	0	0	k__Bacteria	p__Proteobacteria	c__Deltaproteobacteria	o__Myxococcales	f__Myxococcaceae	g__	s__
seq1547	0	21	0	0	0	0	k__Bacteria	p__Actinobacteria	c__Actinobacteria	o__Actinomycetales
seq1548	0	8	0	6	7	0	k__Bacteria	p__Gemmatimonadetes	c__Gemmatimonadetes	o__Gemmatimonadales	f__Ellin5301	g__	s__
seq1549	0	21	0	0	0	0	k__Bacteria	p__Actinobacteria	c__Thermoleophilia	o__Gaiellales	f__Gaiellaceae	g__	s__
seq1550	0	21	0	0	0	0	k__Bacteria	p__Acidobacteria	c__Acidobacteriia	o__Acidobacteriales	f__Koribacteraceae	g__Candidatus Koribacter	s__
seq1551	0	4	0	0	11	6	k__Bacteria	p__Proteobacteria	c__Alphaproteobacteria	o__Rhizobiales	f__Hyphomicrobiaceae
seq1552	0	21	0	0	0	0	k__Bacteria	p__Actinobacteria	c__Thermoleophilia	o__Gaiellales	f__Gaiellaceae	g__	s__
seq1553	0	0	15	0	4	2	k__Bacteria	p__Proteobacteria	c__Alphaproteobacteria	o__BD7-3	f__	g__	s__
seq1554	0	0	21	0	0	0	k__Bacteria	p__Proteobacteria	c__Deltaproteobacteria	o__Syntrophobacterales	f__Syntrophobacteraceae	g__	s__
seq1555	0	0	21	0	0	0	k__Archaea	p__Euryarchaeota	c__Methanomicrobia	o__Methanomicrobiales	f__Methanoregulaceae	g__Candidatus Methanoregula	s__
seq1556	0	0	21	0	0	0	k__Bacteria	p__Firmicutes	c__Clostridia	o__Clostridiales	f__Ruminococcaceae	g__	s__
seq1557	0	0	21	0	0	0	k__Bacteria	p__Firmicutes	c__Clostridia	o__Clostridiales	f__Lachnospiraceae	g__Coprococcus	s__
seq1558	0	0	21	0	0	0	k__Bacteria	p__Proteobacteria	c__Gammaproteobacteria	o__Xanthomonadales	f__Sinobacteraceae	g__	s__
seq1559	0	0	11	0	10	0	k__Bacteria	p__Proteobacteria	c__Alphaproteobacteria	o__Rhizobiales	f__Hyphomicrobiaceae	g__	s__
seq1560	0	0	21	0	0	0	k__Bacteria	p__Proteobacteria	c__Deltaproteobacteria	o__Syntrophobacterales	f__Syntrophobacteraceae	g__	s__
seq1561	0	0	4	13	0	4	k__Bacteria	p__Proteobacteria	c__Betaproteobacteria	o__	f__	g__	s__
seq1562	0	0	21	0	0	0	k__Bacteria	p__Proteobacteria	c__Deltaproteobacteria	o__Myxococcales	f__Myxococcaceae	g__	s__
seq1563	0	0	0	21	0	0	k__Bacteria	p__Firmicutes	c__Bacilli	o__Bacillales	f__Bacillaceae
seq1564	0	0	0	10	11	0	k__Bacteria	p__Actinobacteria	c__MB-A2-108	o__0319-7L14	f__	g__	s__
seq1565	0	0	0	21	0	0	k__Bacteria	p__Firmicutes	c__Bacilli	o__Bacillales	f__Planococcaceae
seq1566	0	0	0	21	0	0	k__Bacteria	p__Firmicutes	c__Bacilli	o__Bacillales	f__Bacillaceae	g__Bacillus
seq1567	0	0	0	9	12	0	k__Bacteria	p__Firmicutes	c__Bacilli	o__Bacillales	f__Bacillaceae
seq1568	0	0	0	21	0	0	k__Bacteria	p__Firmicutes	c__Bacilli	o__Bacillales	f__Bacillaceae
seq1569	0	0	0	21	0	0	k__Bacteria	p__Firmicutes	c__Bacilli	o__Bacillales	f__Planococcaceae	g__Planomicrobium	s__
seq1570	0	0	0	0	10	11	k__Bacteria	p__Chloroflexi	c__Chloroflexi	o__AKIW781	f__	g__	s__
seq1571	0	0	0	0	7	14	k__Bacteria	p__Proteobacteria	c__Betaproteobacteria	o__Burkholderiales	f__Alcaligenaceae	g__	s__
seq1572	0	0	0	0	5	16	k__Bacteria	p__Proteobacteria	c__Gammaproteobacteria	o__Oceanospirillales	f__Hahellaceae	g__	s__
seq1573	0	0	0	0	21	0	k__Bacteria	p__Firmicutes	c__Bacilli	o__Bacillales	f__Bacillaceae	g__Bacillus	s__cohnii
seq1574	0	0	0	0	9	12	k__Bacteria	p__Proteobacteria	c__Alphaproteobacteria	o__Rhodospirillales	f__Rhodospirillaceae	g__	s__
seq1575	0	0	0	0	21	0	k__Bacteria	p__Firmicutes	c__Bacilli	o__Bacillales	f__Bacillaceae	g__Bacillus	s__
seq1576	0	0	0	0	21	0	k__Bacteria	p__Proteobacteria	c__Alphaproteobacteria	o__Sphingomonadales	f__Erythrobacteraceae	g__	s__
seq1577	0	0	0	0	21	0	k__Bacteria	p__Actinobacteria	c__Acidimicrobiia	o__Acidimicrobiales	f__	g__	s__
seq1578	0	0	0	0	21	0	k__Bacteria	p__Firmicutes	c__Bacilli	o__Bacillales	f__Bacillaceae	g__Bacillus	s__foraminis
seq1579	0	0	0	0	21	0	k__Bacteria	p__Firmicutes	c__Bacilli	o__Bacillales	f__Bacillaceae	g__Bacillus
seq1580	0	0	0	0	0	21	k__Bacteria	p__Actinobacteria	c__Actinobacteria	o__Actinomycetales	f__Actinosynnemataceae	g__Saccharothrix	s__
seq1581	0	0	0	0	0	21	k__Bacteria	p__Firmicutes	c__Bacilli	o__Bacillales	f__Bacillaceae	g__Bacillus	s__
seq1582	0	0	0	0	0	21	k__Bacteria	p__Nitrospirae	c__Nitrospira	o__Nitrospirales	f__0319-6A21	g__	s__
seq1583	0	0	0	0	0	21	k__Bacteria	p__Chloroflexi	c__Ellin6529	o__	f__	g__	s__
seq1584	0	0	0	0	0	21	k__Bacteria	p__Actinobacteria	c__MB-A2-108	o__0319-7L14	f__	g__	s__
seq1585	0	0	0	0	0	21	k__Bacteria	p__Actinobacteria	c__Actinobacteria	o__Actinomycetales	f__Nocardioidaceae	g__	s__
seq1586	0	0	0	0	0	21	k__Bacteria	p__Actinobacteria	c__Actinobacteria	o__Actinomycetales	f__Micromonosporaceae	g__	s__
seq1587	0	0	0	0	0	21	k__Bacteria	p__Actinobacteria	c__Actinobacteria	o__Actinomycetales	f__Intrasporangiaceae	g__Phycicoccus	s__
seq1588	0	0	0	0	0	21	k__Bacteria	p__Firmicutes	c__Bacilli	o__Bacillales	f__Bacillaceae	g__Bacillus	s__endophyticus
seq1589	12	0	0	8	0	0	k__Bacteria	p__Proteobacteria	c__Betaproteobacteria	o__Ellin6067	f__	g__	s__
seq1590	20	0	0	0	0	0	k__Bacteria	p__Synergistetes	c__Synergistia	o__Synergistales	f__TTA_B6	g__E6	s__
seq1591	7	0	13	0	0	0	k__Bacteria	p__Proteobacteria	c__Betaproteobacteria	o__Burkholderiales
seq1592	20	0	0	0	0	0	k__Bacteria	p__Proteobacteria	c__Deltaproteobacteria	o__Desulfuromonadales	f__Desulfuromonadaceae	g__	s__
seq1593	20	0	0	0	0	0	k__Bacteria	p__Firmicutes	c__Clostridia	o__Clostridiales	f__Clostridiaceae	g__Clostridium
seq1594	9	0	11	0	0	0	k__Bacteria	p__Acidobacteria	c__Holophagae	o__Holophagales	f__Holophagaceae	g__	s__
seq1595	20	0	0	0	0	0	k__Bacteria	p__Actinobacteria	c__Actinobacteria	o__Actinomycetales	f__Micromonosporaceae	g__Pilimelia	s__
seq1596	20	0	0	0	0	0	k__Bacteria	p__Acidobacteria	c__Solibacteres	o__Solibacterales	f__Solibacteraceae	g__	s__
seq1597	3	9	8	0	0	0	k__Bacteria	p__Actinobacteria	c__Actinobacteria	o__Actinomycetales	f__Propionibacteriaceae	g__Tessaracoccus	s__
seq1598	5	0	0	15	0	0	k__Bacteria	p__Proteobacteria	c__Alphaproteobacteria	o__Rhodospirillales	f__Rhodospirillaceae	g__	s__
seq1599	5	0	0	0	8	7	k__Bacteria	p__Proteobacteria	c__Betaproteobacteria	o__Burkholderiales	f__Comamonadaceae
seq1600	6	0	0	0	14	0	k__Bacteria	p__Actinobacteria	c__Actinobacteria	o__Actinomycetales	f__Micrococcaceae
seq1601	20	0	0	0	0	0	k__Bacteria	p__Caldiserica	c__WCHB1-03	o__	f__	g__	s__
seq1602	6	0	0	0	0	14	k__Bacteria	p__Proteobacteria	c__Alphaproteobacteria	o__Rhodospirillales	f__Acetobacteraceae	g__	s__
seq1603	0	18	2	0	0	0	k__Bacteria	p__AD3	c__JG37-AG-4	o__	f__	g__	s__
seq1604	0	20	0	0	0	0	k__Bacteria	p__Proteobacteria	c__Betaproteobacteria	o__Burkholderiales	f__Burkholderiaceae	g__Burkholderia	s__
seq1605	0	20	0	0	0	0	k__Bacteria	p__Proteobacteria	c__Deltaproteobacteria	o__Desulfobacterales	f__Desulfobacteraceae
seq1606	0	15	0	5	0	0	k__Bacteria	p__Verrucomicrobia	c__[Spartobacteria]	o__[Chthoniobacterales]	f__[Chthoniobacteraceae]	g__Candidatus Xiphinematobacter	s__
seq1607	0	20	0	0	0	0	k__Bacteria	p__Bacteroidetes	c__Bacteroidia	o__Bacteroidales	f__	g__	s__
seq1608	0	20	0	0	0	0	k__Bacteria	p__Actinobacteria	c__Thermoleophilia	o__Gaiellales	f__Gaiellaceae	g__	s__
seq1609	0	20	0	0	0	0	k__Bacteria	p__Proteobacteria	c__Gammaproteobacteria	o__Xanthomonadales	f__Sinobacteraceae	g__	s__
seq1610	0	10	10	0	0	0	k__Bacteria	p__Proteobacteria	c__Betaproteobacteria	o__SC-I-84	f__	g__	s__
seq1611	0	20	0	0	0	0	k__Bacteria	p__Proteobacteria	c__Betaproteobacteria	o__Rhodocyclales	f__Rhodocyclaceae	g__Dechloromonas
seq1612	0	20	0	0	0	0	k__Bacteria	p__Proteobacteria	c__Deltaproteobacteria	o__Syntrophobacterales	f__Syntrophorhabdaceae	g__	s__
seq1613	0	9	11	0	0	0	k__Bacteria	p__Proteobacteria	c__Gammaproteobacteria	o__Methylococcales	f__Methylococcaceae	g__Methylomonas	s__
seq1614	0	7	0	0	0	13	k__Bacteria	p__Proteobacteria	c__Betaproteobacteria	o__Rhodocyclales	f__Rhodocyclaceae
seq1615	0	20	0	0	0	0	k__Bacteria	p__Actinobacteria	c__Actinobacteria	o__Actinomycetales	f__Microbacteriaceae	g__Leucobacter	s__
seq1616	0	0	20	0	0	0	k__Bacteria	p__Gemmatimonadetes	c__Gemmatimonadetes	o__	f__	g__	s__
seq1617	0	0	20	0	0	0	k__Bacteria	p__Proteobacteria	c__Deltaproteobacteria	o__Myxococcales	f__	g__	s__
seq1618	0	0	20	0	0	0	k__Bacteria	p__Spirochaetes	c__[Leptospirae]	o__[Leptospirales]	f__Sediment-4	g__SJA-88	s__
seq1619	0	0	2	5	9	4	k__Bacteria	p__Bacteroidetes	c__[Saprospirae]	o__[Saprospirales]	f__Chitinophagaceae	g__Niabella	s__
seq1620	0	0	20	0	0	0	k__Bacteria	p__Actinobacteria	c__Acidimicrobiia	o__Acidimicrobiales	f__	g__	s__
seq1621	0	0	7	0	13	0	k__Bacteria	p__Proteobacteria	c__Alphaproteobacteria	o__Rhodospirillales	f__Acetobacteraceae	g__	s__
seq1622	0	0	0	20	0	0	k__Bacteria	p__Proteobacteria	c__Gammaproteobacteria	o__Alteromonadales	f__Idiomarinaceae	g__	s__
seq1623	0	0	0	11	0	9	k__Bacteria	p__Proteobacteria	c__Alphaproteobacteria	o__Caulobacterales	f__Caulobacteraceae	g__Mycoplana	s__
seq1624	0	0	0	7	7	6	k__Bacteria	p__Proteobacteria	c__Alphaproteobacteria	o__Rhizobiales
seq1625	0	0	0	20	0	0	k__Bacteria	p__Actinobacteria	c__Actinobacteria	o__Actinomycetales	f__Geodermatophilaceae
seq1626	0	0	0	7	0	13	k__Bacteria	p__Firmicutes	c__Bacilli	o__Bacillales	f__Staphylococcaceae	g__Jeotgalicoccus	s__
seq1627	0	0	0	11	9	0	k__Bacteria	p__Actinobacteria	c__Thermoleophilia	o__Solirubrobacterales	f__Solirubrobacteraceae
seq1628	0	0	0	4	0	16	k__Bacteria	p__Actinobacteria	c__Actinobacteria	o__Actinomycetales	f__Kineosporiaceae	g__Kineococcus	s__
seq1629	0	0	0	20	0	0	k__Bacteria	p__Actinobacteria	c__Actinobacteria	o__Actinomycetales	f__Yaniellaceae	g__Yaniella	s__
seq1630	0	0	0	6	4	10	k__Bacteria	p__Actinobacteria	c__Actinobacteria	o__Actinomycetales	f__Pseudonocardiaceae	g__Saccharopolyspora	s__
seq1631	0	0	0	20	0	0	k__Bacteria	p__Proteobacteria	c__Alphaproteobacteria	o__Rhizobiales	f__Bradyrhizobiaceae	g__Bradyrhizobium	s__
seq1632	0	0	0	0	20	0	k__Bacteria	p__Firmicutes	c__Bacilli	o__Bacillales	f__Bacillaceae
seq1633	0	0	0	0	20	0	k__Bacteria	p__Actinobacteria	c__Acidimicrobiia	o__Acidimicrobiales	f__	g__	s__
seq1634	0	0	0	0	20	0	k__Bacteria	p__Nitrospirae	c__Nitrospira	o__Nitrospirales	f__0319-6A21	g__	s__
seq1635	0	0	0	0	20	0	k__Bacteria	p__Firmicutes	c__Bacilli	o__Bacillales	f__Bacillaceae	g__Bacillus
seq1636	0	0	0	0	9	11	k__Bacteria	p__Firmicutes	c__Clostridia	o__Clostridiales	f__Clostridiaceae	g__Alkaliphilus	s__
seq1637	0	0	0	0	20	0	k__Bacteria	p__Acidobacteria	c__Acidobacteria-5	o__	f__	g__	s__
seq1638	0	0	0	0	20	0	k__Bacteria	p__Firmicutes	c__Bacilli	o__Bacillales	f__Planococcaceae	g__Planomicrobium	s__
seq1639	0	0	0	0	20	0	k__Bacteria	p__Proteobacteria	c__Betaproteobacteria	o__Burkholderiales	f__Alcaligenaceae
seq1640	0	0	0	0	11	9	k__Bacteria	p__Proteobacteria	c__Betaproteobacteria	o__Burkholderiales	f__Oxalobacteraceae	g__	s__
seq1641	0	0	0	0	20	0	k__Bacteria	p__Actinobacteria	c__Actinobacteria	o__Actinomycetales	f__Microbacteriaceae	g__Cryocola	s__
seq1642	0	0	0	0	0	20	k__Archaea	p__Crenarchaeota	c__Thaumarchaeota	o__Nitrososphaerales	f__Nitrososphaeraceae	g__Candidatus Nitrososphaera	s__SCA1170
seq1643	0	0	0	0	0	20	k__Bacteria	p__Proteobacteria	c__Alphaproteobacteria	o__Rhizobiales	f__Hyphomicrobiaceae	g__Rhodoplanes	s__
seq1644	0	0	0	0	0	20	k__Bacteria	p__Actinobacteria	c__Actinobacteria	o__Actinomycetales	f__Frankiaceae	g__	s__
seq1645	0	0	0	0	0	20	k__Bacteria	p__Proteobacteria	c__Deltaproteobacteria	o__Myxococcales	f__Haliangiaceae	g__	s__
seq1646	0	0	0	0	0	20	k__Bacteria	p__Actinobacteria	c__Thermoleophilia	o__Solirubrobacterales	f__	g__	s__
seq1647	0	0	0	0	0	20	k__Bacteria	p__Proteobacteria	c__Alphaproteobacteria	o__Rhizobiales	f__Phyllobacteriaceae
seq1648	0	0	0	0	0	20	k__Bacteria	p__Actinobacteria	c__Actinobacteria	o__Actinomycetales	f__Thermomonosporaceae	g__Actinomadura	s__vinacea
seq1649	0	0	0	0	0	20	k__Bacteria	p__Firmicutes	c__Bacilli	o__Bacillales	f__Bacillaceae
seq1650	0	0	0	0	0	20	k__Bacteria	p__Proteobacteria	c__Betaproteobacteria	o__Burkholderiales	f__Oxalobacteraceae
seq1651	0	0	0	0	0	20	k__Bacteria	p__Chloroflexi	c__Ellin6529	o__	f__	g__	s__
seq1652	0	0	0	0	0	20	k__Bacteria	p__Firmicutes	c__Bacilli	o__Bacillales	f__Bacillaceae	g__Bacillus
seq1653	8	6	0	5	0	0	k__Bacteria	p__Chloroflexi	c__Ktedonobacteria	o__Thermogemmatisporales	f__Thermogemmatisporaceae	g__	s__
seq1654	9	0	0	10	0	0	k__Bacteria	p__Actinobacteria	c__Actinobacteria	o__Actinomycetales	f__Thermomonosporaceae	g__Actinocorallia	s__
seq1655	9	0	10	0	0	0	k__Bacteria	p__Proteobacteria	c__Gammaproteobacteria	o__Thiotrichales	f__Piscirickettsiaceae	g__	s__
seq1656	8	11	0	0	0	0	k__Bacteria	p__Proteobacteria
seq1657	10	9	0	0	0	0	k__Bacteria	p__Chloroflexi	c__TK17	o__mle1-48	f__	g__	s__
seq1658	12	0	0	7	0	0	k__Bacteria	p__Proteobacteria	c__Alphaproteobacteria	o__Rhodospirillales	f__Rhodospirillaceae	g__	s__
seq1659	6	9	4	0	0	0	k__Bacteria	p__Proteobacteria	c__Gammaproteobacteria	o__Xanthomonadales	f__Xanthomonadaceae	g__Thermomonas	s__
seq1660	15	0	4	0	0	0	k__Bacteria	p__Proteobacteria	c__Alphaproteobacteria	o__Rhizobiales	f__Hyphomicrobiaceae	g__Hyphomicrobium	s__
seq1661	7	0	12	0	0	0	k__Bacteria	p__Chloroflexi	c__Anaerolineae	o__Anaerolineales	f__Anaerolinaceae	g__T78	s__
seq1662	9	0	0	10	0	0	k__Bacteria	p__Acidobacteria	c__Acidobacteriia	o__Acidobacteriales	f__Koribacteraceae	g__	s__
seq1663	19	0	0	0	0	0	k__Bacteria	p__Actinobacteria	c__Actinobacteria	o__Actinomycetales	f__Kineosporiaceae	g__	s__
seq1664	19	0	0	0	0	0	k__Bacteria	p__Actinobacteria	c__Actinobacteria	o__Actinomycetales	f__Frankiaceae	g__	s__
seq1665	8	0	11	0	0	0	k__Bacteria	p__Actinobacteria	c__Actinobacteria	o__Actinomycetales	f__Nocardioidaceae	g__Propionicimonas	s__
seq1666	7	0	0	0	0	12	k__Bacteria	p__Actinobacteria	c__Acidimicrobiia	o__Acidimicrobiales	f__EB1017	g__	s__
seq1667	0	19	0	0	0	0	k__Bacteria	p__Proteobacteria	c__Gammaproteobacteria	o__Chromatiales
seq1668	0	8	11	0	0	0	k__Bacteria	p__Firmicutes	c__Clostridia	o__SHA-98	f__	g__	s__
seq1669	0	8	11	0	0	0	k__Bacteria	p__Proteobacteria	c__Deltaproteobacteria	o__Myxococcales	f__Myxococcaceae	g__Anaeromyxobacter	s__
seq1670	0	19	0	0	0	0	k__Bacteria	p__Verrucomicrobia	c__[Pedosphaerae]	o__[Pedosphaerales]	f__Ellin515	g__	s__
seq1671	0	13	6	0	0	0	k__Bacteria	p__Actinobacteria	c__Thermoleophilia	o__Gaiellales	f__	g__	s__
seq1672	0	7	0	0	12	0	k__Bacteria	p__Chloroflexi	c__Thermomicrobia	o__JG30-KF-CM45	f__	g__	s__
seq1673	0	19	0	0	0	0	k__Bacteria	p__Actinobacteria	c__Actinobacteria	o__Actinomycetales	f__Intrasporangiaceae
seq1674	0	19	0	0	0	0	k__Bacteria	p__Actinobacteria	c__Thermoleophilia	o__Gaiellales	f__Gaiellaceae	g__	s__
seq1675	0	10	9	0	0	0	k__Bacteria	p__Proteobacteria	c__Betaproteobacteria	o__Rhodocyclales	f__Rhodocyclaceae	g__C39	s__
seq1676	0	19	0	0	0	0	k__Bacteria	p__Proteobacteria	c__Alphaproteobacteria	o__Rhizobiales	f__Hyphomicrobiaceae	g__Hyphomicrobium	s__
seq1677	0	5	14	0	0	0	k__Bacteria	p__Bacteroidetes	c__Bacteroidia	o__Bacteroidales	f__	g__	s__
seq1678	0	19	0	0	0	0	k__Bacteria	p__Acidobacteria	c__Acidobacteriia	o__Acidobacteriales	f__Koribacteraceae	g__Candidatus Koribacter	s__
seq1679	0	3	0	4	12	0	k__Bacteria	p__Firmicutes	c__Bacilli	o__Bacillales	f__Thermoactinomycetaceae	g__	s__
seq1680	0	4	15	0	0	0	k__Bacteria	p__Proteobacteria	c__Betaproteobacteria	o__IS-44	f__	g__	s__
seq1681	0	19	0	0	0	0	k__Bacteria	p__Acidobacteria	c__Acidobacteriia	o__Acidobacteriales	f__Koribacteraceae	g__	s__
seq1682	0	9	10	0	0	0	k__Bacteria	p__Chloroflexi	c__Anaerolineae	o__Anaerolineales	f__Anaerolinaceae	g__WCHB1-05	s__
seq1683	0	19	0	0	0	0	k__Bacteria	p__Acidobacteria	c__Acidobacteria-6	o__CCU21	f__	g__	s__
seq1684	0	19	0	0	0	0	k__Bacteria	p__Proteobacteria	c__Alphaproteobacteria	o__Rhizobiales
seq1685	0	19	0	0	0	0	k__Bacteria	p__Proteobacteria	c__Deltaproteobacteria	o__Syntrophobacterales	f__Syntrophobacteraceae	g__	s__
seq1686	0	19	0	0	0	0	k__Bacteria	p__Proteobacteria	c__Alphaproteobacteria	o__Rhizobiales	f__Bradyrhizobiaceae	g__Bradyrhizobium	s__
seq1687	0	8	11	0	0	0	k__Bacteria	p__Acidobacteria	c__Holophagae	o__Holophagales	f__Holophagaceae	g__	s__
seq1688	0	19	0	0	0	0	k__Bacteria	p__Proteobacteria	c__Alphaproteobacteria	o__Rhizobiales	f__Hyphomicrobiaceae	g__Rhodoplanes	s__
seq1689	0	7	12	0	0	0	k__Bacteria	p__Proteobacteria	c__Gammaproteobacteria	o__Methylococcales	f__Methylococcaceae	g__Methylocaldum	s__
seq1690	0	11	8	0	0	0	k__Bacteria	p__Proteobacteria	c__Deltaproteobacteria	o__Desulfobacterales	f__Desulfobacteraceae	g__Desulfosarcina	s__
seq1691	0	5	14	0	0	0	k__Bacteria	p__AD3	c__ABS-6	o__	f__	g__	s__
seq1692	0	19	0	0	0	0	k__Bacteria	p__Proteobacteria	c__Deltaproteobacteria	o__Desulfuromonadales	f__Desulfuromonadaceae	g__	s__
seq1693	0	19	0	0	0	0	k__Bacteria	p__Actinobacteria	c__Actinobacteria	o__Actinomycetales	f__Microbacteriaceae	g__Microbacterium	s__
seq1694	0	0	10	0	9	0	k__Bacteria	p__Proteobacteria	c__Alphaproteobacteria	o__Kiloniellales	f__	g__	s__
seq1695	0	0	11	0	8	0	k__Bacteria	p__Proteobacteria	c__Gammaproteobacteria
seq1696	0	0	8	0	11	0	k__Bacteria
seq1697	0	0	8	0	11	0	k__Bacteria	p__Chlamydiae	c__Chlamydiia	o__Chlamydiales
seq1698	0	0	13	0	6	0	k__Bacteria	p__Proteobacteria	c__Gammaproteobacteria	o__Xanthomonadales	f__Sinobacteraceae	g__	s__
seq1699	0	0	6	6	3	4	k__Bacteria	p__Proteobacteria	c__Alphaproteobacteria	o__Rhodospirillales	f__Rhodospirillaceae	g__Magnetospirillum	s__
seq1700	0	0	19	0	0	0	k__Bacteria	p__Synergistetes	c__Synergistia	o__Synergistales	f__Dethiosulfovibrionaceae	g__HA73	s__
seq1701	0	0	19	0	0	0	k__Bacteria	p__Spirochaetes	c__Spirochaetes	o__Spirochaetales	f__Spirochaetaceae	g__Treponema	s__
seq1702	0	0	10	0	9	0	k__Bacteria	p__Proteobacteria	c__Alphaproteobacteria	o__Rhodospirillales	f__Rhodospirillaceae	g__Skermanella	s__
seq1703	0	0	19	0	0	0	k__Bacteria	p__Firmicutes	c__Clostridia	o__Clostridiales	f__Clostridiaceae	g__Clostridium	s__
seq1704	0	0	0	19	0	0	k__Bacteria	p__Firmicutes	c__Bacilli	o__Bacillales	f__Paenibacillaceae	g__Paenibacillus	s__
seq1705	0	0	0	19	0	0	k__Bacteria	p__Proteobacteria	c__Gammaproteobacteria	o__Alteromonadales	f__Alteromonadaceae	g__Marinobacter	s__
seq1706	0	0	0	8	11	0	k__Bacteria	p__Verrucomicrobia	c__[Spartobacteria]	o__[Chthoniobacterales]	f__[Chthoniobacteraceae]	g__	s__
seq1707	0	0	0	2	6	11	k__Bacteria	p__Proteobacteria	c__Alphaproteobacteria	o__RF32	f__	g__	s__
seq1708	0	0	0	19	0	0	k__Bacteria	p__Cyanobacteria	c__Chloroplast	o__Streptophyta	f__	g__	s__
seq1709	0	0	0	19	0	0	k__Bacteria	p__Acidobacteria	c__Solibacteres	o__Solibacterales	f__Solibacteraceae	g__Candidatus Solibacter	s__
seq1710	0	0	0	19	0	0	k__Bacteria	p__Firmicutes	c__Bacilli	o__Bacillales	f__Bacillaceae	g__Bacillus
seq1711	0	0	0	19	0	0	k__Bacteria	p__Actinobacteria	c__Actinobacteria	o__Actinomycetales
seq1712	0	0	0	19	0	0	k__Bacteria	p__Firmicutes	c__Bacilli	o__Bacillales	f__Planococcaceae
seq1713	0	0	0	19	0	0	k__Bacteria	p__Verrucomicrobia	c__[Spartobacteria]	o__[Chthoniobacterales]	f__[Chthoniobacteraceae]	g__DA101	s__
seq1714	0	0	0	19	0	0	k__Bacteria	p__Actinobacteria	c__Thermoleophilia	o__Gaiellales	f__Gaiellaceae	g__	s__
seq1715	0	0	0	0	19	0	k__Bacteria	p__Bacteroidetes	c__Bacteroidia	o__Bacteroidales	f__[Paraprevotellaceae]	g__CF231	s__
seq1716	0	0	0	0	19	0	k__Bacteria	p__Actinobacteria	c__Acidimicrobiia	o__Acidimicrobiales	f__	g__	s__
seq1717	0	0	0	0	14	5	k__Bacteria	p__Actinobacteria	c__Thermoleophilia	o__Gaiellales	f__AK1AB1_02E	g__	s__
seq1718	0	0	0	0	19	0	k__Bacteria	p__Actinobacteria	c__Actinobacteria	o__Actinomycetales	f__Actinosynnemataceae	g__	s__
seq1719	0	0	0	0	9	10	k__Bacteria	p__Proteobacteria	c__Alphaproteobacteria	o__Sphingomonadales	f__Sphingomonadaceae
seq1720	0	0	0	0	13	6	k__Bacteria	p__Actinobacteria	c__Actinobacteria	o__Actinomycetales	f__Pseudonocardiaceae	g__Amycolatopsis	s__
seq1721	0	0	0	0	19	0	k__Bacteria	p__Proteobacteria	c__Gammaproteobacteria	o__Xanthomonadales	f__Xanthomonadaceae	g__Lysobacter	s__
seq1722	0	0	0	0	10	9	k__Bacteria	p__Proteobacteria	c__Gammaproteobacteria	o__Vibrionales	f__Vibrionaceae	g__Vibrio	s__
seq1723	0	0	0	0	19	0	k__Bacteria	p__Bacteroidetes	c__Cytophagia	o__Cytophagales	f__Cytophagaceae	g__Pontibacter	s__
seq1724	0	0	0	0	19	0	k__Bacteria	p__Actinobacteria	c__Thermoleophilia	o__Solirubrobacterales	f__Conexibacteraceae	g__	s__
seq1725	0	0	0	0	19	0	k__Bacteria	p__Actinobacteria	c__Actinobacteria	o__Actinomycetales	f__Nocardioidaceae	g__	s__
seq1726	0	0	0	0	0	19	k__Bacteria	p__Proteobacteria	c__Alphaproteobacteria	o__Rickettsiales	f__Rickettsiaceae	g__	s__
seq1727	0	0	0	0	0	19	k__Bacteria	p__Firmicutes	c__Clostridia	o__Clostridiales	f__Clostridiaceae	g__Clostridium
seq1728	0	0	0	0	0	19	k__Bacteria	p__Proteobacteria	c__Gammaproteobacteria	o__Xanthomonadales	f__Sinobacteraceae	g__Steroidobacter	s__
seq1729	0	0	0	0	0	19	k__Bacteria	p__Verrucomicrobia	c__[Spartobacteria]	o__[Chthoniobacterales]	f__[Chthoniobacteraceae]	g__DA101	s__
seq1730	0	0	0	0	0	19	k__Bacteria	p__Proteobacteria	c__Alphaproteobacteria	o__Rhodospirillales	f__Acetobacteraceae
seq1731	0	0	0	0	0	19	k__Bacteria	p__Actinobacteria	c__Actinobacteria	o__Actinomycetales	f__Pseudonocardiaceae	g__Pseudonocardia	s__
seq1732	0	0	0	0	0	19	k__Bacteria	p__Actinobacteria	c__Actinobacteria	o__Actinomycetales	f__Propionibacteriaceae
seq1733	0	0	0	0	0	19	k__Bacteria	p__Proteobacteria	c__Alphaproteobacteria	o__Rhizobiales	f__Bradyrhizobiaceae	g__Balneimonas	s__
seq1734	0	0	0	0	0	19	k__Bacteria	p__Acidobacteria	c__iii1-8	o__32-20	f__	g__	s__
seq1735	0	0	0	0	0	19	k__Bacteria	p__Acidobacteria	c__Solibacteres	o__Solibacterales	f__AKIW659	g__	s__
seq1736	0	0	0	0	0	19	k__Bacteria	p__Actinobacteria	c__Actinobacteria	o__Actinomycetales	f__Micromonosporaceae	g__Actinoplanes	s__
seq1737	0	0	0	0	0	19	k__Bacteria	p__Actinobacteria	c__Actinobacteria	o__Actinomycetales	f__Geodermatophilaceae	g__Geodermatophilus	s__obscurus
seq1738	0	0	0	0	0	19	k__Bacteria	p__Actinobacteria	c__Actinobacteria	o__Actinomycetales	f__Geodermatophilaceae	g__Modestobacter	s__
seq1739	0	0	0	0	0	19	k__Bacteria	p__Actinobacteria	c__Thermoleophilia	o__Gaiellales	f__Gaiellaceae	g__	s__
seq1740	0	0	0	0	0	19	k__Bacteria	p__Proteobacteria	c__Alphaproteobacteria	o__Caulobacterales	f__Caulobacteraceae	g__Phenylobacterium	s__
seq1741	0	0	0	0	0	19	k__Bacteria	p__Firmicutes	c__Bacilli	o__Bacillales	f__Bacillaceae	g__Bacillus	s__
seq1742	13	0	0	5	0	0	k__Bacteria	p__Proteobacteria	c__Alphaproteobacteria	o__Rhodospirillales	f__Rhodospirillaceae	g__	s__
seq1743	13	0	0	5	0	0	k__Bacteria	p__Proteobacteria	c__Deltaproteobacteria	o__Syntrophobacterales	f__Syntrophobacteraceae	g__	s__
seq1744	10	0	0	8	0	0	k__Bacteria	p__Gemmatimonadetes	c__Gemm-1	o__	f__	g__	s__
seq1745	5	0	0	0	4	9	k__Bacteria	p__Proteobacteria	c__Gammaproteobacteria	o__Alteromonadales	f__Alteromonadaceae	g__	s__
seq1746	8	10	0	0	0	0	k__Bacteria	p__Proteobacteria	c__Deltaproteobacteria	o__Myxococcales	f__Myxococcaceae	g__Anaeromyxobacter	s__
seq1747	9	9	0	0	0	0	k__Bacteria	p__Proteobacteria	c__Betaproteobacteria	o__Burkholderiales	f__Comamonadaceae	g__Hydrogenophaga	s__
seq1748	2	0	0	9	7	0	k__Bacteria	p__Proteobacteria	c__Gammaproteobacteria	o__Alteromonadales	f__Idiomarinaceae	g__	s__
seq1749	7	0	0	11	0	0	k__Bacteria	p__Firmicutes	c__Bacilli	o__Bacillales
seq1750	18	0	0	0	0	0	k__Bacteria	p__Actinobacteria	c__Actinobacteria	o__Actinomycetales	f__	g__	s__
seq1751	8	10	0	0	0	0	k__Bacteria	p__Acidobacteria	c__Holophagae	o__Holophagales	f__Holophagaceae	g__	s__
seq1752	7	0	0	11	0	0	k__Bacteria	p__Acidobacteria	c__Acidobacteria-6	o__iii1-15	f__	g__	s__
seq1753	18	0	0	0	0	0	k__Bacteria	p__Proteobacteria	c__Deltaproteobacteria	o__Myxococcales	f__Polyangiaceae	g__	s__
seq1754	18	0	0	0	0	0	k__Bacteria	p__Proteobacteria	c__Deltaproteobacteria	o__Syntrophobacterales	f__Syntrophaceae	g__	s__
seq1755	18	0	0	0	0	0	k__Bacteria	p__Proteobacteria	c__Betaproteobacteria	o__Burkholderiales	f__Oxalobacteraceae
seq1756	18	0	0	0	0	0	k__Bacteria	p__Firmicutes	c__Clostridia	o__Clostridiales	f__Ruminococcaceae	g__	s__
seq1757	0	18	0	0	0	0	k__Bacteria	p__Chlamydiae	c__Chlamydiia	o__Chlamydiales
seq1758	0	18	0	0	0	0	k__Bacteria	p__Proteobacteria	c__Alphaproteobacteria	o__Rhodobacterales	f__Rhodobacteraceae
seq1759	0	14	4	0	0	0	k__Bacteria	p__Proteobacteria	c__Betaproteobacteria	o__SC-I-84	f__	g__	s__
seq1760	0	3	15	0	0	0	k__Bacteria	p__Proteobacteria	c__Alphaproteobacteria
seq1761	0	18	0	0	0	0	k__Bacteria	p__Proteobacteria	c__Deltaproteobacteria	o__Syntrophobacterales	f__Syntrophobacteraceae	g__	s__
seq1762	0	18	0	0	0	0	k__Bacteria	p__Actinobacteria	c__Actinobacteria	o__Actinomycetales	f__Micromonosporaceae	g__	s__
seq1763	0	18	0	0	0	0	k__Bacteria	p__Acidobacteria	c__DA052	o__Ellin6513	f__	g__	s__
seq1764	0	18	0	0	0	0	k__Bacteria	p__Proteobacteria	c__Deltaproteobacteria	o__Syntrophobacterales	f__Syntrophorhabdaceae	g__	s__
seq1765	0	8	10	0	0	0	k__Bacteria	p__Proteobacteria	c__Gammaproteobacteria	o__Thiotrichales	f__Thiotrichaceae	g__	s__
seq1766	0	18	0	0	0	0	k__Bacteria	p__Acidobacteria	c__Acidobacteriia	o__Acidobacteriales	f__Koribacteraceae	g__	s__
seq1767	0	9	9	0	0	0	k__Bacteria	p__Proteobacteria	c__Betaproteobacteria	o__A21b	f__UD5	g__	s__
seq1768	0	18	0	0	0	0	k__Bacteria	p__Proteobacteria	c__Alphaproteobacteria	o__Rhizobiales	f__Rhizobiaceae	g__Agrobacterium	s__
seq1769	0	5	13	0	0	0	k__Bacteria	p__Firmicutes	c__Clostridia	o__Clostridiales	f__Lachnospiraceae	g__Coprococcus	s__
seq1770	0	18	0	0	0	0	k__Bacteria	p__Acidobacteria	c__Acidobacteriia	o__Acidobacteriales	f__Koribacteraceae	g__	s__
seq1771	0	9	9	0	0	0	k__Bacteria	p__Proteobacteria	c__Deltaproteobacteria	o__Myxococcales
seq1772	0	6	0	0	12	0	k__Bacteria	p__Proteobacteria	c__Alphaproteobacteria	o__Rhodospirillales	f__Rhodospirillaceae	g__	s__
seq1773	0	0	13	0	5	0	k__Bacteria	p__Proteobacteria	c__TA18	o__CV90	f__	g__	s__
seq1774	0	0	9	0	9	0	k__Bacteria	p__Proteobacteria	c__Alphaproteobacteria	o__Rickettsiales	f__	g__	s__
seq1775	0	0	18	0	0	0	k__Bacteria	p__Chloroflexi	c__Anaerolineae	o__SJA-15	f__	g__	s__
seq1776	0	0	9	0	9	0	k__Bacteria	p__Bacteroidetes
seq1777	0	0	18	0	0	0	k__Bacteria	p__Proteobacteria	c__Gammaproteobacteria	o__Methylococcales	f__Methylococcaceae	g__Methylocaldum	s__
seq1778	0	0	8	0	10	0	k__Bacteria	p__Firmicutes	c__Clostridia	o__Clostridiales	f__Veillonellaceae
seq1779	0	0	18	0	0	0	k__Bacteria	p__Actinobacteria	c__Coriobacteriia	o__Coriobacteriales	f__Coriobacteriaceae
seq1780	0	0	18	0	0	0	k__Bacteria	p__Proteobacteria	c__Betaproteobacteria	o__Burkholderiales	f__Oxalobacteraceae	g__Janthinobacterium	s__
seq1781	0	0	18	0	0	0	k__Bacteria	p__Actinobacteria	c__Actinobacteria	o__Actinomycetales	f__Frankiaceae	g__	s__
seq1782	0	0	18	0	0	0	k__Bacteria	p__Actinobacteria	c__Thermoleophilia	o__Solirubrobacterales	f__Conexibacteraceae	g__	s__
seq1783	0	0	5	0	0	13	k__Bacteria	p__Proteobacteria	c__Gammaproteobacteria	o__Thiotrichales	f__Piscirickettsiaceae	g__	s__
seq1784	0	0	5	0	13	0	k__Bacteria	p__Bacteroidetes	c__[Saprospirae]	o__[Saprospirales]	f__Chitinophagaceae	g__Flavisolibacter	s__
seq1785	0	0	0	6	12	0	k__Bacteria	p__Verrucomicrobia	c__[Pedosphaerae]	o__[Pedosphaerales]
seq1786	0	0	0	8	10	0	k__Bacteria	p__Actinobacteria	c__Actinobacteria	o__Actinomycetales	f__Nocardioidaceae	g__	s__
seq1787	0	0	0	18	0	0	k__Bacteria	p__Actinobacteria	c__Actinobacteria	o__Actinomycetales	f__	g__	s__
seq1788	0	0	0	18	0	0	k__Bacteria	p__Proteobacteria	c__Alphaproteobacteria	o__Caulobacterales	f__Caulobacteraceae	g__Phenylobacterium	s__
seq1789	0	0	0	18	0	0	k__Bacteria	p__Actinobacteria	c__Actinobacteria	o__Actinomycetales	f__Promicromonosporaceae
seq1790	0	0	0	18	0	0	k__Bacteria	p__Proteobacteria	c__Alphaproteobacteria	o__Rhizobiales	f__Hyphomicrobiaceae	g__Rhodoplanes	s__
seq1791	0	0	0	5	7	6	k__Bacteria	p__Actinobacteria	c__Acidimicrobiia	o__Acidimicrobiales	f__	g__	s__
seq1792	0	0	0	18	0	0	k__Bacteria	p__Actinobacteria	c__Actinobacteria	o__Actinomycetales	f__Geodermatophilaceae
seq1793	0	0	0	0	18	0	k__Bacteria	p__Bacteroidetes	c__Sphingobacteriia	o__Sphingobacteriales	f__Sphingobacteriaceae	g__	s__
seq1794	0	0	0	0	13	5	k__Bacteria	p__Proteobacteria	c__Alphaproteobacteria	o__Sphingomonadales	f__Sphingomonadaceae	g__Sphingomonas	s__
seq1795	0	0	0	0	13	5	k__Bacteria	p__Firmicutes	c__Clostridia	o__Clostridiales	f__Ruminococcaceae	g__	s__
seq1796	0	0	0	0	10	8	k__Bacteria	p__Gemmatimonadetes	c__Gemm-3	o__	f__	g__	s__
seq1797	0	0	0	0	18	0	k__Bacteria	p__Proteobacteria	c__Deltaproteobacteria	o__Syntrophobacterales	f__Syntrophobacteraceae	g__	s__
seq1798	0	0	0	0	13	5	k__Bacteria	p__Bacteroidetes	c__Cytophagia	o__Cytophagales	f__Cytophagaceae	g__Pontibacter	s__
seq1799	0	0	0	0	18	0	k__Bacteria	p__Acidobacteria	c__Acidobacteria-6	o__iii1-15	f__	g__	s__
seq1800	0	0	0	0	11	7	k__Bacteria	p__Proteobacteria	c__Betaproteobacteria	o__Burkholderiales
seq1801	0	0	0	0	18	0	k__Bacteria	p__Firmicutes	c__Bacilli	o__Bacillales	f__Bacillaceae	g__Bacillus	s__selenatarsenatis
seq1802	0	0	0	0	18	0	k__Bacteria	p__Actinobacteria	c__Actinobacteria	o__Actinomycetales	f__Mycobacteriaceae	g__Mycobacterium	s__
seq1803	0	0	0	0	8	10	k__Bacteria	p__Gemmatimonadetes	c__Gemmatimonadetes	o__	f__	g__	s__
seq1804	0	0	0	0	18	0	k__Bacteria	p__Firmicutes	c__Bacilli	o__Bacillales
seq1805	0	0	0	0	18	0	k__Bacteria	p__Proteobacteria	c__Alphaproteobacteria	o__Rhizobiales
seq1806	0	0	0	0	10	8	k__Bacteria	p__Firmicutes	c__Bacilli	o__Bacillales	f__Bacillaceae	g__Bacillus	s__
seq1807	0	0	0	0	18	0	k__Bacteria	p__Proteobacteria	c__Alphaproteobacteria	o__Rhodospirillales	f__Acetobacteraceae
seq1808	0	0	0	0	8	10	k__Bacteria	p__Proteobacteria	c__Alphaproteobacteria	o__Rhodospirillales	f__Acetobacteraceae	g__	s__
seq1809	0	0	0	0	18	0	k__Bacteria	p__Proteobacteria	c__Alphaproteobacteria	o__Rhodospirillales	f__Rhodospirillaceae	g__Skermanella	s__
seq1810	0	0	0	0	18	0	k__Bacteria	p__Proteobacteria	c__Alphaproteobacteria	o__Rhodospirillales	f__Acetobacteraceae
seq1811	0	0	0	0	18	0	k__Bacteria	p__Actinobacteria	c__Actinobacteria	o__Actinomycetales	f__Geodermatophilaceae	g__Geodermatophilus
seq1812	0	0	0	0	18	0	k__Bacteria	p__Firmicutes	c__Bacilli	o__Bacillales	f__Bacillaceae	g__Bacillus	s__endophyticus
seq1813	0	0	0	0	8	10	k__Bacteria	p__Proteobacteria	c__Alphaproteobacteria	o__Rhizobiales	f__Hyphomicrobiaceae	g__Rhodoplanes	s__
seq1814	0	0	0	0	18	0	k__Bacteria	p__Proteobacteria	c__Betaproteobacteria	o__Burkholderiales	f__Oxalobacteraceae	g__	s__
seq1815	0	0	0	0	0	18	k__Bacteria	p__Gemmatimonadetes	c__Gemm-1	o__	f__	g__	s__
seq1816	0	0	0	0	0	18	k__Bacteria	p__Proteobacteria	c__Deltaproteobacteria	o__Syntrophobacterales	f__Syntrophobacteraceae	g__	s__
seq1817	0	0	0	0	0	18	k__Bacteria	p__Actinobacteria	c__MB-A2-108	o__0319-7L14	f__	g__	s__
seq1818	0	0	0	0	0	18	k__Bacteria	p__Actinobacteria	c__Actinobacteria	o__Actinomycetales
seq1819	0	0	0	0	0	18	k__Bacteria	p__Actinobacteria	c__Actinobacteria	o__Actinomycetales	f__Streptosporangiaceae	g__Sphaerisporangium	s__
seq1820	0	0	0	0	0	18	k__Bacteria	p__Actinobacteria	c__Thermoleophilia	o__Gaiellales	f__Gaiellaceae	g__	s__
seq1821	0	0	0	0	0	18	k__Bacteria	p__Firmicutes	c__Bacilli	o__Lactobacillales	f__Aerococcaceae	g__	s__
seq1822	0	0	0	0	0	18	k__Bacteria	p__Actinobacteria	c__Thermoleophilia	o__Gaiellales	f__	g__	s__
seq1823	0	0	0	0	0	18	k__Bacteria	p__Proteobacteria	c__Gammaproteobacteria	o__Xanthomonadales	f__Xanthomonadaceae	g__Stenotrophomonas	s__
seq1824	0	0	0	0	0	18	k__Bacteria	p__Actinobacteria	c__Actinobacteria	o__Actinomycetales
seq1825	0	0	0	0	0	18	k__Bacteria	p__Acidobacteria	c__Acidobacteria-6	o__iii1-15	f__	g__	s__
seq1826	0	0	0	0	0	18	k__Bacteria	p__Proteobacteria	c__Alphaproteobacteria	o__Rhizobiales
seq1827	0	0	0	0	0	18	k__Bacteria	p__Firmicutes	c__Bacilli	o__Bacillales	f__Bacillaceae	g__Bacillus
seq1828	0	0	0	0	0	18	k__Bacteria	p__Firmicutes	c__Bacilli	o__Bacillales	f__Bacillaceae	g__Bacillus	s__
seq1829	17	0	0	0	0	0	k__Bacteria	p__Actinobacteria	c__MB-A2-108	o__0319-7L14	f__	g__	s__
seq1830	17	0	0	0	0	0	k__Bacteria	p__Actinobacteria	c__Actinobacteria	o__Actinomycetales	f__	g__	s__
seq1831	12	5	0	0	0	0	k__Bacteria	p__Chloroflexi	c__Anaerolineae	o__Anaerolineales	f__Anaerolinaceae	g__	s__
seq1832	6	6	5	0	0	0	k__Bacteria	p__Proteobacteria	c__Deltaproteobacteria	o__Desulfarculales	f__Desulfarculaceae	g__	s__
seq1833	8	0	0	9	0	0	k__Bacteria	p__Chloroflexi	c__Ktedonobacteria	o__JG30-KF-AS9	f__	g__	s__
seq1834	17	0	0	0	0	0	k__Bacteria	p__Proteobacteria	c__Alphaproteobacteria	o__Rhodospirillales	f__Acetobacteraceae	g__	s__
seq1835	17	0	0	0	0	0	k__Bacteria	p__Acidobacteria	c__DA052	o__Ellin6513	f__	g__	s__
seq1836	11	0	0	6	0	0	k__Bacteria	p__Actinobacteria	c__Thermoleophilia	o__Solirubrobacterales
seq1837	17	0	0	0	0	0	k__Bacteria	p__Acidobacteria	c__iii1-8	o__32-20	f__	g__	s__
seq1838	5	0	0	12	0	0	k__Bacteria	p__Actinobacteria	c__Acidimicrobiia	o__Acidimicrobiales	f__	g__	s__
seq1839	5	7	5	0	0	0	k__Bacteria	p__Proteobacteria	c__Alphaproteobacteria	o__Rhizobiales	f__Hyphomicrobiaceae	g__Devosia	s__
seq1840	17	0	0	0	0	0	k__Bacteria	p__Actinobacteria	c__Acidimicrobiia	o__Acidimicrobiales	f__koll13	g__	s__
seq1841	17	0	0	0	0	0	k__Bacteria	p__Nitrospirae	c__Nitrospira	o__Nitrospirales	f__0319-6A21	g__	s__
seq1842	17	0	0	0	0	0	k__Bacteria	p__Actinobacteria	c__Actinobacteria	o__Actinomycetales	f__Actinosynnemataceae	g__Saccharothrix	s__
seq1843	3	0	0	14	0	0	k__Bacteria	p__Actinobacteria	c__Acidimicrobiia	o__Acidimicrobiales
seq1844	17	0	0	0	0	0	k__Bacteria	p__Actinobacteria	c__Actinobacteria	o__Actinomycetales	f__Micromonosporaceae
seq1845	7	0	0	10	0	0	k__Bacteria	p__Proteobacteria	c__Alphaproteobacteria	o__Sphingomonadales	f__Sphingomonadaceae	g__Kaistobacter	s__
seq1846	8	0	9	0	0	0	k__Bacteria	p__Proteobacteria	c__Deltaproteobacteria	o__Desulfuromonadales	f__Geobacteraceae	g__Geobacter	s__
seq1847	0	17	0	0	0	0	k__Bacteria	p__Acidobacteria	c__Acidobacteriia	o__Acidobacteriales	f__Koribacteraceae	g__	s__
seq1848	0	17	0	0	0	0	k__Bacteria	p__Acidobacteria	c__iii1-8	o__32-20	f__	g__	s__
seq1849	0	17	0	0	0	0	k__Bacteria	p__Firmicutes	c__Bacilli	o__Bacillales	f__Alicyclobacillaceae	g__Alicyclobacillus	s__
seq1850	0	4	13	0	0	0	k__Bacteria	p__Chloroflexi	c__Anaerolineae	o__GCA004	f__	g__	s__
seq1851	0	17	0	0	0	0	k__Bacteria	p__Actinobacteria	c__Actinobacteria	o__Actinomycetales	f__	g__	s__
seq1852	0	17	0	0	0	0	k__Bacteria	p__Acidobacteria	c__Acidobacteriia	o__Acidobacteriales	f__Koribacteraceae	g__	s__
seq1853	0	13	0	0	4	0	k__Bacteria	p__Acidobacteria	c__Acidobacteriia	o__Acidobacteriales	f__Koribacteraceae	g__Candidatus Koribacter	s__
seq1854	0	17	0	0	0	0	k__Bacteria	p__Proteobacteria	c__Alphaproteobacteria	o__Rhizobiales	f__Phyllobacteriaceae	g__Mesorhizobium	s__
seq1855	0	17	0	0	0	0	k__Bacteria	p__Actinobacteria	c__Actinobacteria	o__Actinomycetales	f__Frankiaceae	g__	s__
seq1856	0	17	0	0	0	0	k__Bacteria	p__Actinobacteria	c__Actinobacteria	o__Actinomycetales	f__Frankiaceae	g__	s__
seq1857	0	8	9	0	0	0	k__Bacteria	p__Proteobacteria	c__Betaproteobacteria	o__Hydrogenophilales	f__Hydrogenophilaceae	g__Thiobacillus	s__
seq1858	0	9	8	0	0	0	k__Bacteria	p__Chloroflexi	c__Anaerolineae	o__Anaerolineales	f__Anaerolinaceae	g__Anaerolinea	s__
seq1859	0	7	10	0	0	0	k__Bacteria	p__Caldiserica	c__WCHB1-03	o__	f__	g__	s__
seq1860	0	17	0	0	0	0	k__Bacteria	p__Proteobacteria	c__Betaproteobacteria	o__Burkholderiales	f__Comamonadaceae
seq1861	0	0	12	0	5	0	k__Bacteria	p__Bacteroidetes	c__Flavobacteriia	o__Flavobacteriales
seq1862	0	0	9	0	8	0	k__Bacteria	p__Proteobacteria	c__Gammaproteobacteria	o__Xanthomonadales	f__Xanthomonadaceae	g__Luteimonas	s__
seq1863	0	0	17	0	0	0	k__Bacteria	p__Firmicutes	c__Clostridia	o__Clostridiales	f__Christensenellaceae	g__	s__
seq1864	0	0	17	0	0	0	k__Bacteria	p__Proteobacteria	c__Deltaproteobacteria	o__Syntrophobacterales	f__Syntrophobacteraceae	g__	s__
seq1865	0	0	2	0	15	0	k__Bacteria	p__Verrucomicrobia	c__Opitutae	o__[Pelagicoccales]	f__[Pelagicoccaceae]	g__Pelagicoccus	s__
seq1866	0	0	17	0	0	0	k__Bacteria	p__Proteobacteria	c__Alphaproteobacteria	o__Rhizobiales	f__	g__	s__
seq1867	0	0	17	0	0	0	k__Bacteria	p__Proteobacteria
seq1868	0	0	17	0	0	0	k__Bacteria	p__Bacteroidetes	c__Bacteroidia	o__Bacteroidales	f__	g__	s__
seq1869	0	0	6	0	11	0	k__Bacteria	p__Firmicutes	c__Bacilli	o__Bacillales	f__Paenibacillaceae	g__Cohnella	s__
seq1870	0	0	17	0	0	0	k__Bacteria	p__Actinobacteria	c__Acidimicrobiia	o__Acidimicrobiales	f__EB1017	g__	s__
seq1871	0	0	17	0	0	0	k__Bacteria	p__Proteobacteria	c__Betaproteobacteria	o__Rhodocyclales	f__Rhodocyclaceae	g__Dechloromonas	s__
seq1872	0	0	17	0	0	0	k__Bacteria	p__Chloroflexi	c__Anaerolineae	o__SJA-15	f__	g__	s__
seq1873	0	0	7	0	10	0	k__Bacteria	p__Proteobacteria	c__Alphaproteobacteria	o__Rhodospirillales	f__Rhodospirillaceae	g__	s__
seq1874	0	0	0	17	0	0	k__Bacteria	p__Actinobacteria	c__Actinobacteria	o__Actinomycetales	f__Micromonosporaceae
seq1875	0	0	0	10	7	0	k__Bacteria	p__Proteobacteria	c__Alphaproteobacteria	o__Rhodospirillales	f__Acetobacteraceae
seq1876	0	0	0	10	7	0	k__Bacteria	p__Proteobacteria	c__Deltaproteobacteria	o__Myxococcales	f__	g__	s__
seq1877	0	0	0	4	3	10	k__Bacteria	p__Acidobacteria	c__[Chloracidobacteria]	o__RB41
seq1878	0	0	0	17	0	0	k__Bacteria	p__Actinobacteria	c__Thermoleophilia	o__Solirubrobacterales	f__	g__	s__
seq1879	0	0	0	17	0	0	k__Bacteria	p__Chloroflexi	c__TK10	o__B07_WMSP1
seq1880	0	0	0	17	0	0	k__Bacteria	p__Actinobacteria	c__Actinobacteria	o__Actinomycetales
seq1881	0	0	0	17	0	0	k__Bacteria	p__Actinobacteria	c__Actinobacteria	o__Actinomycetales
seq1882	0	0	0	17	0	0	k__Bacteria	p__Firmicutes	c__Bacilli	o__Bacillales	f__Bacillaceae
seq1883	0	0	0	8	9	0	k__Bacteria	p__Bacteroidetes	c__[Saprospirae]	o__[Saprospirales]	f__Chitinophagaceae	g__Flavisolibacter	s__
seq1884	0	0	0	17	0	0	k__Bacteria	p__Acidobacteria	c__iii1-8	o__32-20	f__	g__	s__
seq1885	0	0	0	17	0	0	k__Bacteria	p__Acidobacteria	c__Acidobacteria-6	o__iii1-15	f__	g__	s__
seq1886	0	0	0	17	0	0	k__Bacteria	p__Bacteroidetes	c__[Saprospirae]	o__[Saprospirales]	f__Chitinophagaceae	g__Flavisolibacter	s__
seq1887	0	0	0	17	0	0	k__Bacteria	p__Proteobacteria	c__Alphaproteobacteria	o__Sphingomonadales	f__Sphingomonadaceae	g__	s__
seq1888	0	0	0	3	14	0	k__Bacteria	p__Firmicutes	c__Clostridia	o__Clostridiales	f__Ruminococcaceae	g__	s__
seq1889	0	0	0	8	0	9	k__Bacteria	p__Chloroflexi	c__Thermomicrobia	o__AKYG1722	f__	g__	s__
seq1890	0	0	0	17	0	0	k__Bacteria	p__Actinobacteria	c__Actinobacteria	o__Actinomycetales	f__Micromonosporaceae	g__	s__
seq1891	0	0	0	17	0	0	k__Bacteria	p__Cyanobacteria	c__Chloroplast	o__Streptophyta	f__	g__	s__
seq1892	0	0	0	17	0	0	k__Bacteria	p__Firmicutes	c__Bacilli	o__Bacillales	f__Bacillaceae	g__Bacillus	s__
seq1893	0	0	0	17	0	0	k__Bacteria	p__Actinobacteria	c__Actinobacteria	o__Actinomycetales	f__Pseudonocardiaceae
seq1894	0	0	0	17	0	0	k__Bacteria	p__Acidobacteria	c__DA052	o__Ellin6513	f__	g__	s__
seq1895	0	0	0	17	0	0	k__Bacteria	p__Actinobacteria	c__Actinobacteria	o__Actinomycetales	f__Frankiaceae	g__	s__
seq1896	0	0	0	17	0	0	k__Bacteria	p__Proteobacteria	c__Alphaproteobacteria	o__Rhizobiales	f__Bradyrhizobiaceae	g__Balneimonas	s__
seq1897	0	0	0	17	0	0	k__Bacteria	p__Proteobacteria	c__Alphaproteobacteria	o__Sphingomonadales	f__Sphingomonadaceae	g__Sphingomonas	s__
seq1898	0	0	0	0	17	0	k__Bacteria	p__Firmicutes	c__Bacilli	o__Bacillales	f__Bacillaceae	g__Bacillus	s__cellulosilyticus
seq1899	0	0	0	0	10	7	k__Bacteria	p__Firmicutes	c__Bacilli	o__Bacillales	f__Bacillaceae	g__Bacillus	s__clausii
seq1900	0	0	0	0	17	0	k__Bacteria	p__Bacteroidetes	c__Cytophagia	o__Cytophagales	f__Cytophagaceae	g__Dyadobacter	s__
seq1901	0	0	0	0	17	0	k__Bacteria	p__Gemmatimonadetes	c__Gemm-3	o__	f__	g__	s__
seq1902	0	0	0	0	7	10	k__Bacteria	p__Proteobacteria	c__Gammaproteobacteria	o__Alteromonadales	f__211ds20	g__	s__
seq1903	0	0	0	0	17	0	k__Bacteria	p__Firmicutes	c__Bacilli	o__Bacillales
seq1904	0	0	0	0	17	0	k__Bacteria	p__Firmicutes	c__Bacilli	o__Bacillales	f__Bacillaceae	g__Bacillus
seq1905	0	0	0	0	17	0	k__Bacteria	p__Actinobacteria	c__Actinobacteria	o__Actinomycetales	f__Thermomonosporaceae	g__Actinoallomurus
seq1906	0	0	0	0	17	0	k__Bacteria	p__Firmicutes	c__Bacilli	o__Bacillales	f__Bacillaceae	g__Bacillus	s__
seq1907	0	0	0	0	17	0	k__Bacteria	p__Actinobacteria	c__Actinobacteria	o__Actinomycetales	f__Kineosporiaceae	g__Kineococcus	s__
seq1908	0	0	0	0	17	0	k__Bacteria	p__Proteobacteria	c__Alphaproteobacteria	o__Rhizobiales	f__Hyphomicrobiaceae	g__Rhodoplanes	s__
seq1909	0	0	0	0	8	9	k__Bacteria	p__Actinobacteria	c__Actinobacteria	o__Actinomycetales	f__Nocardioidaceae	g__Actinopolymorpha	s__
seq1910	0	0	0	0	17	0	k__Bacteria	p__Actinobacteria	c__Actinobacteria	o__Actinomycetales	f__Micromonosporaceae	g__	s__
seq1911	0	0	0	0	17	0	k__Bacteria	p__Firmicutes	c__Bacilli	o__Bacillales	f__Bacillaceae
seq1912	0	0	0	0	17	0	k__Bacteria	p__Actinobacteria	c__Actinobacteria	o__Actinomycetales
seq1913	0	0	0	0	11	6	k__Bacteria	p__Bacteroidetes	c__Cytophagia	o__Cytophagales	f__Cytophagaceae	g__Adhaeribacter	s__
seq1914	0	0	0	0	17	0	k__Bacteria	p__Proteobacteria	c__Alphaproteobacteria	o__Rhizobiales	f__Bradyrhizobiaceae	g__	s__
seq1915	0	0	0	0	17	0	k__Bacteria	p__Gemmatimonadetes	c__Gemm-3	o__	f__	g__	s__
seq1916	0	0	0	0	17	0	k__Bacteria	p__Proteobacteria	c__Betaproteobacteria	o__Burkholderiales	f__Burkholderiaceae	g__Burkholderia	s__
seq1917	0	0	0	0	17	0	k__Bacteria	p__Firmicutes	c__Bacilli	o__Bacillales	f__Bacillaceae
seq1918	0	0	0	0	0	17	k__Bacteria	p__Actinobacteria	c__Actinobacteria	o__Actinomycetales	f__Nocardioidaceae	g__	s__
seq1919	0	0	0	0	0	17	k__Bacteria	p__Bacteroidetes
seq1920	0	0	0	0	0	17	k__Bacteria
seq1921	0	0	0	0	0	17	k__Bacteria	p__Proteobacteria	c__Betaproteobacteria	o__Burkholderiales	f__Alcaligenaceae
seq1922	0	0	0	0	0	17	k__Archaea	p__Euryarchaeota	c__Halobacteria	o__Halobacteriales	f__Halobacteriaceae	g__Natronococcus	s__
seq1923	0	0	0	0	0	17	k__Bacteria	p__Proteobacteria	c__Deltaproteobacteria	o__Syntrophobacterales	f__Syntrophobacteraceae	g__	s__
seq1924	0	0	0	0	0	17	k__Bacteria	p__Actinobacteria	c__MB-A2-108	o__0319-7L14	f__	g__	s__
seq1925	0	0	0	0	0	17	k__Bacteria	p__Firmicutes	c__Bacilli	o__Bacillales	f__Bacillaceae
seq1926	0	0	0	0	0	17	k__Bacteria	p__Proteobacteria	c__Betaproteobacteria	o__Burkholderiales	f__Comamonadaceae
seq1927	0	0	0	0	0	17	k__Bacteria	p__Proteobacteria	c__Deltaproteobacteria	o__Syntrophobacterales	f__Syntrophobacteraceae	g__	s__
seq1928	0	0	0	0	0	17	k__Bacteria	p__Actinobacteria	c__Acidimicrobiia	o__Acidimicrobiales	f__EB1017	g__	s__
seq1929	0	0	0	0	0	17	k__Bacteria	p__Firmicutes	c__Bacilli	o__Bacillales	f__Paenibacillaceae	g__	s__
seq1930	0	0	0	0	0	17	k__Bacteria	p__Firmicutes	c__Bacilli	o__Bacillales	f__Bacillaceae
seq1931	0	0	0	0	0	17	k__Bacteria	p__Actinobacteria	c__Thermoleophilia	o__Solirubrobacterales	f__	g__	s__
seq1932	0	0	0	0	0	17	k__Bacteria	p__Actinobacteria	c__Thermoleophilia	o__Gaiellales	f__Gaiellaceae	g__	s__
seq1933	0	0	0	0	0	17	k__Bacteria	p__Firmicutes	c__Bacilli	o__Bacillales	f__Planococcaceae	g__Solibacillus	s__
seq1934	0	0	0	0	0	17	k__Bacteria	p__Firmicutes	c__Bacilli	o__Bacillales	f__Bacillaceae	g__Bacillus
seq1935	0	0	0	0	0	17	k__Bacteria	p__Actinobacteria	c__Actinobacteria	o__Actinomycetales	f__Cellulomonadaceae	g__Cellulomonas	s__
seq1936	0	0	0	0	0	17	k__Bacteria	p__Firmicutes	c__Bacilli	o__Bacillales	f__Bacillaceae
seq1937	0	0	0	0	0	17	k__Bacteria	p__Proteobacteria	c__Alphaproteobacteria	o__Sphingomonadales	f__Sphingomonadaceae	g__Kaistobacter	s__
seq1938	0	0	0	0	0	17	k__Bacteria	p__Actinobacteria	c__Actinobacteria	o__Actinomycetales	f__Streptomycetaceae
seq1939	7	4	5	0	0	0	k__Bacteria	p__Synergistetes	c__Synergistia	o__Synergistales	f__Thermovirgaceae	g__	s__
seq1940	7	0	9	0	0	0	k__Bacteria	p__Bacteroidetes	c__Bacteroidia	o__Bacteroidales	f__	g__	s__
seq1941	5	5	6	0	0	0	k__Bacteria	p__Firmicutes	c__Clostridia	o__Clostridiales	f__	g__	s__
seq1942	7	0	9	0	0	0	k__Bacteria	p__Actinobacteria	c__Actinobacteria	o__Actinomycetales	f__Actinomycetaceae	g__N09	s__
seq1943	11	0	0	5	0	0	k__Bacteria	p__Actinobacteria	c__Actinobacteria	o__Actinomycetales
seq1944	4	12	0	0	0	0	k__Bacteria	p__Firmicutes	c__Clostridia	o__Clostridiales	f__	g__	s__
seq1945	5	11	0	0	0	0	k__Bacteria	p__Chloroflexi	c__Anaerolineae	o__Anaerolineales	f__Anaerolinaceae	g__Anaerolinea	s__
seq1946	4	5	7	0	0	0	k__Bacteria	p__Proteobacteria	c__Deltaproteobacteria	o__Desulfobacterales	f__Desulfobulbaceae	g__	s__
seq1947	9	0	0	7	0	0	k__Bacteria	p__Proteobacteria	c__Betaproteobacteria	o__Burkholderiales	f__Comamonadaceae
seq1948	16	0	0	0	0	0	k__Bacteria	p__Verrucomicrobia	c__[Spartobacteria]	o__[Chthoniobacterales]	f__[Chthoniobacteraceae]	g__DA101	s__
seq1949	16	0	0	0	0	0	k__Bacteria	p__Proteobacteria	c__Betaproteobacteria	o__SC-I-84	f__	g__	s__
seq1950	16	0	0	0	0	0	k__Bacteria	p__Actinobacteria	c__Thermoleophilia	o__Solirubrobacterales	f__	g__	s__
seq1951	7	0	9	0	0	0	k__Bacteria	p__Acidobacteria	c__Acidobacteria-6	o__iii1-15	f__	g__	s__
seq1952	16	0	0	0	0	0	k__Bacteria	p__Verrucomicrobia	c__[Spartobacteria]	o__[Chthoniobacterales]	f__[Chthoniobacteraceae]	g__DA101	s__
seq1953	3	3	4	0	6	0	k__Bacteria	p__Acidobacteria	c__Acidobacteriia	o__Acidobacteriales	f__Acidobacteriaceae	g__	s__
seq1954	0	16	0	0	0	0	k__Bacteria	p__Proteobacteria	c__Betaproteobacteria	o__Ellin6067	f__	g__	s__
seq1955	0	16	0	0	0	0	k__Bacteria	p__Proteobacteria	c__Gammaproteobacteria	o__Chromatiales	f__Ectothiorhodospiraceae	g__	s__
seq1956	0	16	0	0	0	0	k__Bacteria	p__Proteobacteria	c__Gammaproteobacteria	o__Methylococcales	f__Crenotrichaceae	g__Crenothrix	s__
seq1957	0	3	11	0	2	0	k__Bacteria	p__Proteobacteria	c__Gammaproteobacteria	o__Oceanospirillales	f__Hahellaceae	g__Hahella	s__
seq1958	0	16	0	0	0	0	k__Bacteria	p__Proteobacteria	c__Deltaproteobacteria	o__Myxococcales	f__Polyangiaceae	g__	s__
seq1959	0	11	5	0	0	0	k__Bacteria	p__Acidobacteria	c__Holophagae	o__Holophagales	f__Holophagaceae	g__	s__
seq1960	0	11	5	0	0	0	k__Bacteria	p__Chloroflexi	c__Anaerolineae	o__OPB11	f__	g__	s__
seq1961	0	16	0	0	0	0	k__Bacteria	p__WS3	c__PRR-12	o__Sediment-1	f__PRR-10	g__	s__
seq1962	0	6	10	0	0	0	k__Bacteria	p__Actinobacteria	c__Actinobacteria	o__Actinomycetales	f__Pseudonocardiaceae	g__Saccharopolyspora	s__
seq1963	0	16	0	0	0	0	k__Bacteria	p__Proteobacteria	c__Deltaproteobacteria	o__Syntrophobacterales	f__Syntrophorhabdaceae	g__	s__
seq1964	0	16	0	0	0	0	k__Bacteria	p__Proteobacteria	c__Alphaproteobacteria	o__Rhodospirillales	f__Rhodospirillaceae	g__	s__
seq1965	0	16	0	0	0	0	k__Bacteria	p__Proteobacteria	c__Deltaproteobacteria	o__Syntrophobacterales	f__Syntrophobacteraceae	g__	s__
seq1966	0	9	7	0	0	0	k__Bacteria	p__Firmicutes	c__Clostridia	o__Clostridiales	f__Syntrophomonadaceae	g__Syntrophomonas	s__
seq1967	0	6	0	0	10	0	k__Bacteria	p__Actinobacteria	c__Actinobacteria	o__Actinomycetales	f__Nakamurellaceae	g__	s__
seq1968	0	16	0	0	0	0	k__Bacteria	p__Actinobacteria	c__Actinobacteria	o__Actinomycetales	f__Mycobacteriaceae	g__Mycobacterium	s__
seq1969	0	0	16	0	0	0	k__Bacteria	p__Firmicutes	c__Clostridia	o__Clostridiales	f__Clostridiaceae	g__Clostridium	s__
seq1970	0	0	16	0	0	0	k__Bacteria	p__Proteobacteria	c__Gammaproteobacteria	o__Methylococcales	f__Crenotrichaceae	g__Crenothrix	s__
seq1971	0	0	6	0	6	4	k__Bacteria	p__Proteobacteria	c__Alphaproteobacteria	o__Rhodospirillales	f__Rhodospirillaceae	g__	s__
seq1972	0	0	8	0	4	4	k__Archaea	p__Crenarchaeota	c__Thaumarchaeota	o__Cenarchaeales	f__Cenarchaeaceae	g__Nitrosopumilus	s__
seq1973	0	0	16	0	0	0	k__Bacteria	p__Actinobacteria	c__Acidimicrobiia	o__Acidimicrobiales	f__C111	g__	s__
seq1974	0	0	16	0	0	0	k__Bacteria	p__Actinobacteria	c__Thermoleophilia	o__Solirubrobacterales	f__	g__	s__
seq1975	0	0	16	0	0	0	k__Bacteria	p__Proteobacteria	c__Deltaproteobacteria	o__Syntrophobacterales	f__Syntrophaceae	g__	s__
seq1976	0	0	7	0	9	0	k__Bacteria	p__Proteobacteria	c__Gammaproteobacteria	o__[Marinicellales]	f__[Marinicellaceae]	g__Marinicella	s__
seq1977	0	0	16	0	0	0	k__Bacteria	p__Acidobacteria	c__BPC102	o__MVS-40	f__	g__	s__
seq1978	0	0	16	0	0	0	k__Bacteria	p__Proteobacteria	c__Alphaproteobacteria	o__Rhizobiales	f__Rhizobiaceae
seq1979	0	0	16	0	0	0	k__Bacteria	p__Proteobacteria	c__Deltaproteobacteria	o__GW-28	f__	g__	s__
seq1980	0	0	16	0	0	0	k__Bacteria	p__Proteobacteria	c__Betaproteobacteria	o__Burkholderiales	f__Comamonadaceae
seq1981	0	0	6	0	10	0	k__Bacteria	p__Proteobacteria	c__Alphaproteobacteria	o__Rhodobacterales	f__Rhodobacteraceae
seq1982	0	0	16	0	0	0	k__Bacteria	p__Acidobacteria	c__Solibacteres	o__Solibacterales	f__Solibacteraceae	g__Candidatus Solibacter	s__
seq1983	0	0	16	0	0	0	k__Bacteria	p__Verrucomicrobia	c__[Pedosphaerae]	o__[Pedosphaerales]	f__Ellin515	g__	s__
seq1984	0	0	9	0	7	0	k__Bacteria	p__Proteobacteria	c__Alphaproteobacteria	o__Rhizobiales
seq1985	0	0	11	0	5	0	k__Bacteria	p__Acidobacteria	c__Solibacteres	o__Solibacterales	f__Solibacteraceae	g__Candidatus Solibacter	s__
seq1986	0	0	0	16	0	0	k__Bacteria	p__Firmicutes	c__Bacilli	o__Bacillales	f__Planococcaceae	g__Sporosarcina	s__
seq1987	0	0	0	16	0	0	k__Archaea	p__Euryarchaeota	c__Methanobacteria	o__Methanobacteriales	f__Methanobacteriaceae	g__Methanobrevibacter	s__
seq1988	0	0	0	16	0	0	k__Bacteria	p__Actinobacteria	c__Actinobacteria	o__Actinomycetales	f__Geodermatophilaceae
seq1989	0	0	0	16	0	0	k__Bacteria	p__[Thermi]	c__Deinococci	o__Deinococcales	f__Deinococcaceae	g__Deinococcus	s__
seq1990	0	0	0	16	0	0	k__Bacteria	p__Actinobacteria	c__Acidimicrobiia	o__Acidimicrobiales	f__	g__	s__
seq1991	0	0	0	16	0	0	k__Bacteria	p__Firmicutes	c__Bacilli	o__Lactobacillales	f__Aerococcaceae	g__	s__
seq1992	0	0	0	11	5	0	k__Bacteria	p__Firmicutes	c__Clostridia	o__Clostridiales	f__Lachnospiraceae	g__Roseburia
seq1993	0	0	0	7	9	0	k__Bacteria	p__Proteobacteria	c__Gammaproteobacteria	o__Oceanospirillales	f__Hahellaceae	g__	s__
seq1994	0	0	0	6	10	0	k__Bacteria	p__Bacteroidetes	c__[Saprospirae]	o__[Saprospirales]	f__Chitinophagaceae
seq1995	0	0	0	16	0	0	k__Bacteria	p__Proteobacteria	c__Alphaproteobacteria	o__Caulobacterales	f__Caulobacteraceae	g__	s__
seq1996	0	0	0	16	0	0	k__Bacteria	p__Proteobacteria	c__Betaproteobacteria	o__Burkholderiales	f__Oxalobacteraceae	g__Janthinobacterium	s__
seq1997	0	0	0	16	0	0	k__Bacteria	p__Acidobacteria	c__Acidobacteriia	o__Acidobacteriales	f__Koribacteraceae	g__Candidatus Koribacter	s__
seq1998	0	0	0	16	0	0	k__Bacteria	p__Actinobacteria	c__Actinobacteria	o__Actinomycetales	f__Micrococcaceae	g__Sinomonas	s__
seq1999	0	0	0	5	0	11	k__Bacteria	p__[Thermi]	c__Deinococci	o__Deinococcales	f__Deinococcaceae	g__Deinococcus	s__
[truncated: 4,984 more rows]

## Sheet: OTU table root & soil
	Control2M1	Control2M2	Control2M3	RootZone1	RootZone2	RootZone3	Root1	Root2	Root3	Rhizosphere1	Rhizosphere2	Rhizosphere3	Kingdom	Phylum	Class	Order	Family	Genus	Species
seq1	35	1397	72	1504	14	7	78031	66611	59557	32948	25352	16650	k__Bacteria	p__Cyanobacteria	c__Chloroplast	o__Streptophyta	f__	g__	s__
seq2	4	377	0	710	0	0	32821	44135	44149	17142	7602	5163	k__Bacteria	p__Proteobacteria	c__Alphaproteobacteria	o__Rickettsiales	f__mitochondria	g__Citrullus	s__lanatus
seq3	265	821	276	12673	3332	3796	126	199	144	308	617	1549	k__Bacteria	p__Firmicutes	c__Bacilli	o__Bacillales
seq4	611	582	290	5241	5781	6522	61	79	88	445	1036	2488	k__Bacteria	p__Firmicutes	c__Bacilli	o__Bacillales	f__Bacillaceae	g__Bacillus
seq5	107	433	427	1318	1764	4219	22	32	47	306	1381	3116	k__Bacteria	p__Firmicutes	c__Bacilli	o__Bacillales	f__Planococcaceae
seq6	184	396	202	2075	2212	4825	0	0	0	139	394	1776	k__Bacteria	p__Firmicutes	c__Bacilli	o__Bacillales	f__Bacillaceae	g__Bacillus	s__badius
seq7	155	207	90	1978	3451	2514	58	100	181	184	2345	301	k__Bacteria	p__Proteobacteria	c__Alphaproteobacteria	o__Sphingomonadales	f__Sphingomonadaceae	g__Sphingobium	s__
seq8	150	158	94	1081	1199	1993	24	43	78	432	1967	3967	k__Bacteria	p__Firmicutes	c__Bacilli	o__Bacillales	f__Bacillaceae
seq9	100	214	79	4721	1399	2806	0	0	0	76	196	799	k__Bacteria	p__Firmicutes	c__Bacilli	o__Bacillales
seq10	146	286	105	2856	2722	2328	64	27	73	121	462	666	k__Bacteria	p__Firmicutes	c__Bacilli	o__Bacillales
seq11	172	432	148	1531	1607	2914	0	73	29	197	430	2082	k__Bacteria	p__Firmicutes	c__Bacilli	o__Bacillales	f__Bacillaceae	g__Bacillus
seq12	0	197	9	74	68	158	8	280	462	263	6904	1050	k__Bacteria	p__Proteobacteria	c__Betaproteobacteria	o__Burkholderiales	f__Oxalobacteraceae	g__Cupriavidus	s__
seq13	358	808	286	5090	1528	446	128	216	98	130	108	241	k__Bacteria	p__Actinobacteria	c__Actinobacteria	o__Actinomycetales	f__Micrococcaceae	g__	s__
seq14	6	130	0	139	67	12	410	909	3432	1537	1400	1174	k__Bacteria	p__Actinobacteria	c__Actinobacteria	o__Actinomycetales	f__Pseudonocardiaceae	g__Saccharopolyspora	s__
seq15	2890	3031	1263	271	217	171	11	18	4	133	147	114	k__Bacteria	p__Proteobacteria	c__Alphaproteobacteria	o__Rhizobiales	f__Bradyrhizobiaceae	g__	s__
seq16	16	223	63	6080	1021	152	89	72	63	42	64	96	k__Bacteria	p__Firmicutes	c__Bacilli	o__Bacillales	f__Bacillaceae	g__Bacillus	s__badius
seq17	40	178	28	323	139	426	0	33	122	126	1974	3672	k__Bacteria	p__Proteobacteria	c__Gammaproteobacteria	o__Pseudomonadales	f__Pseudomonadaceae	g__Pseudomonas	s__
seq18	47	104	31	212	207	483	0	0	43	310	878	4541	k__Bacteria	p__Firmicutes	c__Bacilli	o__Bacillales	f__Bacillaceae	g__Bacillus
seq19	0	58	0	48	9	7	54	500	2941	1733	630	264	k__Bacteria	p__Actinobacteria	c__Actinobacteria	o__Actinomycetales	f__Pseudonocardiaceae
seq20	1798	1989	587	311	638	164	0	40	56	91	416	142	k__Bacteria	p__Proteobacteria	c__Alphaproteobacteria	o__Rhizobiales	f__Bradyrhizobiaceae	g__Balneimonas	s__
seq21	1019	2595	901	229	316	239	16	0	0	109	261	99	k__Bacteria	p__Proteobacteria	c__Alphaproteobacteria	o__Rhizobiales	f__Bradyrhizobiaceae	g__Balneimonas	s__
seq22	81	187	266	341	905	996	0	31	64	168	1606	945	k__Bacteria	p__Firmicutes	c__Bacilli	o__Bacillales	f__Bacillaceae	g__Bacillus
seq23	53	57	22	655	1329	1893	20	13	13	47	425	1029	k__Bacteria	p__Firmicutes	c__Bacilli	o__Bacillales	f__Planococcaceae
seq24	59	205	40	3463	1321	75	76	43	39	18	48	143	k__Bacteria	p__Firmicutes	c__Bacilli	o__Bacillales	f__Planococcaceae	g__Planomicrobium	s__
seq25	0	1415	0	128	0	0	392	356	226	1226	892	374	k__Bacteria	p__Cyanobacteria	c__Chloroplast	o__Streptophyta	f__	g__	s__
seq26	406	126	167	673	1418	1067	26	84	0	162	375	274	k__Bacteria	p__Firmicutes	c__Bacilli	o__Bacillales
seq27	0	406	451	1873	1318	367	0	26	0	0	97	74	k__Bacteria	p__Firmicutes	c__Bacilli	o__Bacillales
seq28	1196	181	2942	0	9	118	0	0	0	0	0	0	k__Bacteria	p__Chloroflexi	c__Chloroflexi	o__AKIW781	f__	g__	s__
seq29	301	194	3441	85	124	149	24	0	0	0	80	36	k__Bacteria	p__Proteobacteria	c__Betaproteobacteria	o__Burkholderiales	f__Comamonadaceae
seq30	49	254	88	1356	1465	585	0	0	0	83	250	217	k__Bacteria	p__Firmicutes	c__Bacilli	o__Bacillales	f__Bacillaceae	g__Bacillus
seq31	0	80	0	105	45	207	0	0	27	125	568	3169	k__Bacteria	p__Firmicutes	c__Bacilli	o__Bacillales	f__Bacillaceae	g__Bacillus	s__
seq32	40	92	40	146	19	507	0	0	25	55	408	2981	k__Bacteria	p__Proteobacteria	c__Gammaproteobacteria	o__Pseudomonadales	f__Pseudomonadaceae	g__	s__
seq33	95	141	117	289	1491	266	21	37	66	121	1110	138	k__Bacteria	p__Firmicutes	c__Bacilli	o__Bacillales
seq34	0	154	0	17	8	0	0	242	220	2177	848	190	k__Bacteria	p__Actinobacteria	c__Actinobacteria	o__Actinomycetales	f__Propionibacteriaceae	g__	s__
seq35	169	533	439	433	765	734	37	0	0	89	451	194	k__Bacteria	p__Firmicutes	c__Bacilli	o__Bacillales
seq36	63	111	101	221	51	766	22	19	67	83	1060	1170	k__Bacteria	p__Proteobacteria	c__Gammaproteobacteria	o__Pseudomonadales	f__Pseudomonadaceae	g__Pseudomonas	s__
seq37	784	1524	415	172	246	136	25	14	0	78	219	86	k__Bacteria	p__Proteobacteria	c__Alphaproteobacteria	o__Rhizobiales	f__Bradyrhizobiaceae	g__Balneimonas	s__
seq38	39	177	53	466	356	1330	0	0	0	103	85	901	k__Bacteria	p__Firmicutes	c__Bacilli	o__Bacillales	f__Bacillaceae	g__Bacillus	s__badius
seq39	189	69	137	569	880	1213	0	0	47	55	192	118	k__Bacteria	p__Firmicutes	c__Bacilli	o__Bacillales
seq40	0	18	0	658	0	0	0	1154	21	832	23	542	k__Bacteria	p__Proteobacteria	c__Alphaproteobacteria	o__Rhodobacterales	f__Rhodobacteraceae
seq41	559	1154	726	179	174	222	0	0	0	63	91	44	k__Bacteria	p__Proteobacteria	c__Alphaproteobacteria	o__Rhizobiales	f__Bradyrhizobiaceae	g__Balneimonas	s__
seq42	461	396	1739	135	254	59	0	0	0	21	27	0	k__Bacteria	p__Bacteroidetes	c__Cytophagia	o__Cytophagales	f__Cytophagaceae	g__Adhaeribacter	s__
seq43	36	35	31	631	524	862	13	25	9	69	129	505	k__Bacteria	p__Firmicutes	c__Bacilli	o__Bacillales	f__Planococcaceae	g__Lysinibacillus	s__boronitolerans
seq44	110	46	84	28	22	1796	0	0	0	70	84	468	k__Bacteria	p__Proteobacteria	c__Alphaproteobacteria	o__Sphingomonadales	f__Sphingomonadaceae	g__	s__
seq45	233	324	416	237	803	254	0	0	0	62	193	150	k__Bacteria	p__Firmicutes	c__Bacilli	o__Bacillales	f__Bacillaceae	g__Bacillus	s__
seq46	0	0	0	49	19	0	53	96	1929	235	159	61	k__Bacteria	p__Actinobacteria	c__Actinobacteria	o__Actinomycetales	f__Pseudonocardiaceae	g__Pseudonocardia	s__
seq47	0	83	0	93	54	128	0	73	10	750	88	1290	k__Bacteria	p__Firmicutes	c__Bacilli	o__Bacillales	f__Bacillaceae	g__Terribacillus	s__
seq48	408	1093	226	129	295	98	35	0	0	76	113	83	k__Bacteria	p__Proteobacteria	c__Alphaproteobacteria	o__Sphingomonadales	f__Sphingomonadaceae	g__Sphingomonas	s__
seq49	940	747	521	24	21	67	0	0	0	37	15	16	k__Bacteria	p__Proteobacteria	c__Alphaproteobacteria	o__Rhizobiales	f__Bradyrhizobiaceae	g__	s__
seq50	0	51	0	119	99	308	0	0	0	108	114	1581	k__Bacteria	p__Firmicutes	c__Bacilli	o__Bacillales	f__Bacillaceae	g__Bacillus	s__
seq51	13	32	0	75	455	198	0	0	28	38	320	1160	k__Bacteria	p__Proteobacteria	c__Gammaproteobacteria	o__Pseudomonadales	f__Pseudomonadaceae	g__Pseudomonas	s__
seq52	503	759	551	113	91	124	5	14	6	50	52	44	k__Bacteria	p__Proteobacteria	c__Alphaproteobacteria	o__Rhodobacterales	f__Rhodobacteraceae	g__Rubellimicrobium	s__
seq53	605	333	879	60	57	141	0	18	6	37	118	36	k__Bacteria	p__Proteobacteria	c__Alphaproteobacteria	o__Rhizobiales	f__Bradyrhizobiaceae
seq54	163	181	105	84	142	354	0	40	42	100	806	207	k__Bacteria	p__Proteobacteria	c__Alphaproteobacteria	o__Rhizobiales	f__Bradyrhizobiaceae	g__Balneimonas	s__
seq55	75	167	191	176	233	504	0	29	33	102	455	246	k__Bacteria	p__Firmicutes	c__Bacilli	o__Bacillales	f__Paenibacillaceae	g__Ammoniphilus	s__
seq56	403	785	339	122	203	123	0	10	0	42	90	37	k__Bacteria	p__Proteobacteria	c__Alphaproteobacteria	o__Rhizobiales	f__Bradyrhizobiaceae	g__Balneimonas	s__
seq57	27	118	19	307	1479	51	10	11	11	9	35	26	k__Bacteria	p__Proteobacteria	c__Alphaproteobacteria	o__Sphingomonadales	f__Sphingomonadaceae	g__Sphingomonas	s__wittichii
seq58	131	498	175	537	621	22	13	18	15	15	18	32	k__Bacteria	p__Bacteroidetes	c__Cytophagia	o__Cytophagales	f__Cytophagaceae	g__	s__
seq59	0	5	0	692	51	0	0	6	314	0	372	642	k__Bacteria	p__Proteobacteria	c__Gammaproteobacteria	o__Enterobacteriales	f__Enterobacteriaceae	g__Escherichia	s__coli
seq60	20	68	17	65	0	251	9	33	81	96	725	679	k__Bacteria	p__Proteobacteria	c__Alphaproteobacteria	o__Sphingomonadales	f__Sphingomonadaceae	g__	s__
seq61	332	798	183	97	213	83	0	0	0	37	194	94	k__Bacteria	p__Proteobacteria	c__Alphaproteobacteria	o__Rhizobiales	f__Bradyrhizobiaceae	g__Balneimonas	s__
seq62	44	126	32	38	66	99	0	116	68	366	573	469	k__Bacteria	p__Proteobacteria	c__Alphaproteobacteria	o__Rhizobiales	f__Bradyrhizobiaceae	g__Balneimonas	s__
seq63	0	60	0	0	13	0	0	51	85	290	1449	20	k__Bacteria	p__Actinobacteria	c__Actinobacteria	o__Actinomycetales	f__Dermabacteraceae	g__	s__
seq64	55	91	0	68	40	0	0	133	42	698	408	432	k__Bacteria	p__Actinobacteria	c__Actinobacteria	o__Actinomycetales	f__Streptomycetaceae	g__Streptomyces	s__
seq65	109	286	159	589	335	148	42	41	42	27	84	101	k__Bacteria	p__Proteobacteria	c__Betaproteobacteria	o__Burkholderiales	f__Oxalobacteraceae
seq66	0	64	0	30	0	0	0	96	0	1744	27	0	k__Bacteria	p__Actinobacteria	c__Actinobacteria	o__Actinomycetales	f__Mycobacteriaceae	g__Mycobacterium	s__
seq67	0	48	0	136	267	506	0	0	19	72	370	542	k__Bacteria	p__Firmicutes	c__Bacilli	o__Bacillales	f__Planococcaceae
seq68	6	17	12	51	99	487	0	0	14	23	288	942	k__Bacteria	p__Firmicutes	c__Bacilli	o__Bacillales	f__Planococcaceae
seq69	0	54	0	0	0	0	0	63	0	1762	24	15	k__Bacteria	p__Bacteroidetes	c__Sphingobacteriia	o__Sphingobacteriales	f__Sphingobacteriaceae	g__Parapedobacter	s__
seq70	5	43	0	25	0	0	0	75	11	1649	52	36	k__Bacteria	p__Actinobacteria	c__Actinobacteria	o__Actinomycetales	f__Mycobacteriaceae	g__Mycobacterium	s__
seq71	0	64	0	23	0	0	0	103	78	1269	92	262	k__Bacteria	p__Actinobacteria	c__Actinobacteria	o__Actinomycetales	f__Pseudonocardiaceae
seq72	65	269	122	594	381	119	36	48	41	22	75	87	k__Bacteria	p__Proteobacteria	c__Betaproteobacteria	o__Burkholderiales	f__Oxalobacteraceae
seq73	286	234	717	99	324	40	0	0	17	0	56	21	k__Bacteria	p__Bacteroidetes	c__Cytophagia	o__Cytophagales	f__Cytophagaceae	g__Adhaeribacter	s__
seq74	22	58	106	19	0	0	120	105	0	1176	51	116	k__Bacteria	p__Actinobacteria	c__Actinobacteria	o__Actinomycetales	f__Thermomonosporaceae	g__Actinomadura	s__vinacea
seq75	0	0	0	0	0	0	283	432	464	254	223	99	k__Bacteria	p__Cyanobacteria	c__Chloroplast	o__Streptophyta	f__	g__	s__
seq76	0	0	0	371	419	578	0	0	0	0	112	268	k__Bacteria	p__Firmicutes	c__Bacilli	o__Bacillales	f__Bacillaceae	g__Bacillus	s__
seq77	141	92	33	126	211	193	26	40	35	95	452	296	k__Bacteria	p__Actinobacteria	c__Actinobacteria	o__Actinomycetales	f__Streptomycetaceae
seq78	28	24	61	246	890	307	0	6	0	18	125	33	k__Bacteria	p__Firmicutes	c__Bacilli	o__Bacillales
seq79	0	54	0	121	0	0	4	88	7	1421	0	30	k__Bacteria	p__Actinobacteria	c__Actinobacteria	o__Actinomycetales	f__Glycomycetaceae	g__Glycomyces	s__
seq80	54	104	100	393	440	280	7	0	14	15	232	76	k__Bacteria	p__Bacteroidetes	c__Sphingobacteriia	o__Sphingobacteriales	f__Sphingobacteriaceae	g__	s__
seq81	63	215	52	757	392	91	0	0	0	19	38	51	k__Bacteria	p__Firmicutes	c__Bacilli	o__Bacillales	f__Planococcaceae	g__Planomicrobium	s__
seq82	229	711	375	95	84	71	0	0	0	51	0	39	k__Bacteria	p__Proteobacteria	c__Betaproteobacteria	o__Burkholderiales	f__Oxalobacteraceae	g__	s__
seq83	34	35	18	76	90	695	3	0	16	17	433	223	k__Bacteria	p__Firmicutes	c__Bacilli	o__Bacillales	f__Bacillaceae	g__Bacillus
seq84	0	0	0	0	0	0	237	458	394	250	169	124	k__Bacteria	p__Cyanobacteria	c__Chloroplast	o__Streptophyta	f__	g__	s__
seq85	204	774	223	135	202	25	8	4	0	12	23	21	k__Bacteria	p__Bacteroidetes	c__[Saprospirae]	o__[Saprospirales]	f__Chitinophagaceae	g__Flavisolibacter	s__
seq86	12	51	0	109	211	112	0	0	0	71	63	990	k__Bacteria	p__Firmicutes	c__Bacilli	o__Bacillales	f__Bacillaceae	g__Terribacillus	s__
seq87	177	80	1306	18	7	30	0	0	0	0	0	0	k__Bacteria	p__Bacteroidetes	c__[Saprospirae]	o__[Saprospirales]	f__Chitinophagaceae	g__Flavisolibacter	s__
seq88	37	33	24	126	318	261	0	0	49	47	441	264	k__Bacteria	p__Firmicutes	c__Bacilli	o__Bacillales	f__	g__	s__
seq89	27	58	33	50	57	201	0	14	47	45	792	258	k__Bacteria	p__Proteobacteria	c__Betaproteobacteria	o__Burkholderiales	f__Oxalobacteraceae
seq90	268	617	167	96	149	114	0	0	0	31	89	44	k__Bacteria	p__Proteobacteria	c__Alphaproteobacteria	o__Rhizobiales	f__Bradyrhizobiaceae	g__Balneimonas	s__
seq91	276	402	133	136	327	181	0	9	0	25	39	39	k__Bacteria	p__Proteobacteria	c__Alphaproteobacteria	o__Sphingomonadales	f__Sphingomonadaceae	g__	s__
seq92	0	0	0	0	0	54	0	0	0	0	133	1376	k__Bacteria	p__Firmicutes	c__Bacilli	o__Bacillales	f__Bacillaceae	g__Bacillus	s__
seq93	1498	0	0	19	0	3	0	0	0	34	0	0	k__Archaea	p__Crenarchaeota	c__Thaumarchaeota	o__Nitrososphaerales	f__Nitrososphaeraceae	g__Candidatus Nitrososphaera
seq94	716	38	88	88	195	235	0	24	11	10	94	46	k__Bacteria	p__Actinobacteria	c__Actinobacteria	o__Actinomycetales	f__Streptomycetaceae
seq95	11	37	0	81	0	91	0	0	0	28	82	1209	k__Bacteria	p__Proteobacteria	c__Alphaproteobacteria	o__Sphingomonadales	f__Sphingomonadaceae	g__	s__
seq96	166	549	541	71	142	28	0	0	0	11	11	10	k__Bacteria	p__Bacteroidetes	c__[Saprospirae]	o__[Saprospirales]	f__Chitinophagaceae	g__Flavisolibacter	s__
seq97	140	105	655	145	183	125	0	0	34	33	47	48	k__Bacteria	p__Proteobacteria	c__Betaproteobacteria	o__Burkholderiales	f__Comamonadaceae
seq98	183	238	889	64	68	23	0	0	0	0	20	16	k__Bacteria	p__Bacteroidetes	c__Cytophagia	o__Cytophagales	f__Cytophagaceae	g__Adhaeribacter	s__
seq99	71	36	68	159	279	733	0	10	14	0	47	35	k__Bacteria	p__Proteobacteria	c__Alphaproteobacteria	o__Sphingomonadales	f__Sphingomonadaceae
seq100	228	38	1145	0	7	31	0	0	0	0	0	0	k__Bacteria	p__Chloroflexi	c__Chloroflexi
seq101	60	181	36	546	362	80	18	19	0	19	40	64	k__Bacteria	p__Actinobacteria	c__Actinobacteria	o__Actinomycetales	f__Micrococcaceae	g__	s__
seq102	0	66	0	235	246	584	0	0	0	0	49	225	k__Bacteria	p__Firmicutes	c__Bacilli	o__Bacillales	f__Bacillaceae	g__Bacillus	s__badius
seq103	105	112	371	150	198	248	0	0	0	39	90	84	k__Bacteria	p__Firmicutes	c__Bacilli	o__Bacillales	f__Paenibacillaceae	g__Ammoniphilus	s__
seq104	222	455	198	105	205	49	6	17	10	50	37	41	k__Bacteria	p__Proteobacteria	c__Alphaproteobacteria	o__Rhodobacterales	f__Rhodobacteraceae	g__Rubellimicrobium	s__
seq105	45	49	21	26	37	390	0	50	32	52	462	214	k__Bacteria	p__Proteobacteria	c__Betaproteobacteria	o__Burkholderiales	f__Oxalobacteraceae	g__Cupriavidus	s__
seq106	1085	66	134	21	10	28	0	0	0	13	0	0	k__Bacteria	p__Actinobacteria	c__Rubrobacteria	o__Rubrobacterales	f__Rubrobacteraceae	g__Rubrobacter	s__
seq107	66	20	1215	7	10	35	0	0	0	0	0	2	k__Bacteria	p__Proteobacteria	c__Betaproteobacteria	o__Methylophilales	f__	g__	s__
seq108	0	0	0	178	195	420	0	0	20	40	237	265	k__Bacteria	p__Firmicutes	c__Bacilli	o__Bacillales	f__Bacillaceae	g__Bacillus	s__
seq109	219	161	31	27	84	29	0	0	30	107	443	210	k__Bacteria	p__Proteobacteria	c__Alphaproteobacteria	o__Rhizobiales	f__Bradyrhizobiaceae	g__Balneimonas	s__
seq110	322	393	123	201	206	25	0	0	6	18	11	14	k__Bacteria	p__Bacteroidetes	c__Cytophagia	o__Cytophagales	f__Cytophagaceae	g__Pontibacter	s__
seq111	26	41	7	32	34	44	0	30	0	302	77	725	k__Bacteria	p__Firmicutes	c__Bacilli	o__Bacillales	f__Bacillaceae	g__Bacillus	s__
seq112	11	90	6	34	60	36	0	6	72	48	871	80	k__Bacteria	p__Proteobacteria	c__Alphaproteobacteria	o__Rhizobiales	f__Rhizobiaceae	g__Agrobacterium	s__
seq113	92	374	321	153	168	73	0	0	14	41	39	37	k__Bacteria	p__Proteobacteria	c__Betaproteobacteria	o__Burkholderiales	f__Comamonadaceae
seq114	0	32	0	8	0	0	3	98	0	1120	23	22	k__Bacteria	p__Actinobacteria	c__Actinobacteria	o__Actinomycetales	f__Nocardioidaceae	g__Actinopolymorpha	s__
seq115	46	26	13	44	23	83	8	324	166	123	208	225	k__Bacteria	p__Actinobacteria	c__Actinobacteria	o__Actinomycetales	f__Pseudonocardiaceae	g__Saccharomonospora	s__
seq116	0	56	0	0	0	0	0	101	0	1061	36	35	k__Bacteria	p__Proteobacteria	c__Betaproteobacteria	o__Burkholderiales	f__Alcaligenaceae	g__	s__
seq117	642	74	515	0	0	55	0	0	0	0	0	0	k__Bacteria	p__Actinobacteria	c__Acidimicrobiia	o__Acidimicrobiales	f__	g__	s__
seq118	178	360	296	99	105	119	0	0	0	89	30	0	k__Bacteria	p__Actinobacteria	c__Actinobacteria	o__Actinomycetales	f__Sporichthyaceae	g__	s__
seq119	62	253	288	164	171	169	0	0	18	0	53	95	k__Bacteria	p__Proteobacteria	c__Betaproteobacteria	o__Burkholderiales	f__Oxalobacteraceae	g__	s__
seq120	348	468	210	75	105	27	0	0	0	26	0	0	k__Bacteria	p__Bacteroidetes	c__Cytophagia	o__Cytophagales	f__Cytophagaceae	g__Adhaeribacter	s__
seq121	181	731	154	50	63	20	0	0	0	0	25	16	k__Bacteria	p__Bacteroidetes	c__[Saprospirae]	o__[Saprospirales]	f__Chitinophagaceae	g__Flavisolibacter	s__
seq122	0	0	0	707	0	0	0	0	0	0	0	523	k__Bacteria	p__Proteobacteria	c__Alphaproteobacteria	o__BD7-3	f__	g__	s__
seq123	34	209	160	162	344	98	12	23	0	50	131	0	k__Bacteria	p__Firmicutes	c__Bacilli	o__Bacillales	f__Bacillaceae	g__Bacillus
seq124	28	101	34	538	274	141	0	0	6	10	24	45	k__Bacteria	p__Firmicutes	c__Bacilli	o__Bacillales	f__Planococcaceae	g__Planomicrobium	s__
seq125	23	96	50	376	496	57	10	20	0	7	11	40	k__Bacteria	p__Bacteroidetes	c__Cytophagia	o__Cytophagales	f__Cytophagaceae
seq126	83	76	0	694	258	70	0	0	0	0	0	0	k__Bacteria	p__Firmicutes	c__Bacilli	o__Bacillales	f__Planococcaceae	g__Planomicrobium	s__
seq127	193	287	539	0	0	82	0	8	0	32	0	36	k__Bacteria	p__Proteobacteria	c__Betaproteobacteria
seq128	76	25	1019	0	0	49	0	0	0	0	0	0	k__Bacteria	p__Proteobacteria	c__Betaproteobacteria	o__Burkholderiales
seq129	79	192	77	149	500	98	0	0	4	0	38	29	k__Bacteria	p__Bacteroidetes	c__Cytophagia	o__Cytophagales	f__Cytophagaceae	g__Dyadobacter	s__
seq130	0	13	15	127	66	809	0	0	0	9	42	67	k__Bacteria	p__Firmicutes	c__Bacilli	o__Bacillales	f__Bacillaceae
seq131	58	156	47	262	235	179	24	29	0	24	56	70	k__Bacteria	p__Actinobacteria	c__Actinobacteria	o__Actinomycetales
seq132	83	745	173	33	54	6	0	0	0	7	22	13	k__Bacteria	p__Bacteroidetes	c__[Saprospirae]	o__[Saprospirales]	f__Chitinophagaceae	g__Flavisolibacter	s__
seq133	558	56	472	0	0	38	0	0	0	11	0	0	k__Bacteria	p__Actinobacteria	c__Acidimicrobiia	o__Acidimicrobiales	f__	g__	s__
seq134	85	58	27	142	94	0	0	76	82	219	232	107	k__Bacteria	p__Actinobacteria	c__Actinobacteria	o__Actinomycetales	f__Streptomycetaceae	g__Streptomyces
seq135	292	335	170	68	70	47	0	42	28	0	0	65	k__Bacteria	p__Actinobacteria	c__Actinobacteria	o__Actinomycetales	f__Geodermatophilaceae	g__Geodermatophilus
seq136	0	109	133	476	333	61	0	0	0	0	0	0	k__Bacteria	p__Firmicutes	c__Bacilli	o__Bacillales
seq137	11	38	12	35	26	190	0	11	20	34	394	338	k__Bacteria	p__Proteobacteria	c__Betaproteobacteria	o__Burkholderiales	f__Oxalobacteraceae	g__Cupriavidus	s__
seq138	0	123	0	424	224	198	0	0	0	0	49	83	k__Bacteria	p__Actinobacteria	c__Actinobacteria	o__Actinomycetales	f__Micrococcaceae	g__	s__
seq139	172	0	869	0	0	56	0	0	0	0	0	0	k__Bacteria	p__Gemmatimonadetes	c__Gemm-3	o__	f__	g__	s__
seq140	0	21	0	0	0	0	0	0	25	32	885	120	k__Bacteria	p__Bacteroidetes	c__[Saprospirae]	o__[Saprospirales]	f__Chitinophagaceae	g__Chitinophaga	s__
seq141	83	55	42	86	87	362	21	19	22	38	170	82	k__Bacteria	p__Actinobacteria	c__Actinobacteria	o__Actinomycetales	f__Nocardioidaceae
seq142	330	35	645	0	0	43	0	0	0	0	0	0	k__Bacteria	p__Actinobacteria	c__Acidimicrobiia	o__Acidimicrobiales	f__	g__	s__
seq143	111	272	83	109	125	73	12	13	26	48	137	42	k__Bacteria	p__Actinobacteria	c__Actinobacteria	o__Actinomycetales	f__Nocardioidaceae	g__	s__
seq144	0	15	0	16	0	0	0	35	292	435	184	72	k__Bacteria	p__Actinobacteria	c__Actinobacteria	o__Actinomycetales	f__Pseudonocardiaceae	g__Prauserella	s__rugosa
seq145	37	105	44	413	220	103	14	22	12	11	14	45	k__Bacteria	p__Actinobacteria	c__Actinobacteria	o__Actinomycetales	f__Micrococcaceae
seq146	0	119	0	186	54	0	228	309	136	0	0	0	k__Bacteria	p__Proteobacteria	c__Betaproteobacteria	o__Rhodocyclales	f__Rhodocyclaceae	g__Dechloromonas	s__
seq147	73	375	160	86	167	74	0	0	0	16	38	17	k__Bacteria	p__Bacteroidetes	c__[Saprospirae]	o__[Saprospirales]	f__Chitinophagaceae
seq148	0	31	0	0	0	0	0	79	0	860	16	20	k__Bacteria	p__Actinobacteria	c__Actinobacteria	o__Actinomycetales
seq149	0	19	0	0	0	31	0	53	0	703	34	140	k__Bacteria	p__Firmicutes	c__Bacilli	o__Bacillales	f__Bacillaceae	g__Bacillus
seq150	96	278	143	187	76	45	0	32	0	38	28	55	k__Bacteria	p__Proteobacteria	c__Betaproteobacteria	o__Burkholderiales	f__Oxalobacteraceae
seq151	0	302	0	0	0	0	0	0	0	309	239	121	k__Bacteria	p__Proteobacteria	c__Gammaproteobacteria	o__Pseudomonadales	f__Moraxellaceae	g__Acinetobacter	s__
seq152	45	250	252	91	233	94	0	0	0	0	0	0	k__Bacteria	p__Firmicutes	c__Bacilli	o__Bacillales	f__Bacillaceae	g__Bacillus	s__
seq153	244	416	121	52	79	9	9	0	0	7	16	10	k__Bacteria	p__Bacteroidetes	c__Cytophagia	o__Cytophagales	f__Cytophagaceae	g__Adhaeribacter	s__
seq154	67	0	834	0	0	56	0	0	0	0	0	0	k__Bacteria	p__Actinobacteria	c__Acidimicrobiia	o__Acidimicrobiales	f__	g__	s__
seq155	99	384	73	103	182	43	0	0	0	30	0	40	k__Bacteria	p__Proteobacteria	c__Alphaproteobacteria	o__Sphingomonadales	f__Sphingomonadaceae	g__Sphingomonas	s__
seq156	33	182	16	131	182	314	26	9	7	14	14	17	k__Bacteria	p__Proteobacteria	c__Alphaproteobacteria	o__Sphingomonadales	f__Sphingomonadaceae	g__	s__
seq157	40	241	437	55	73	42	0	0	0	23	34	0	k__Bacteria	p__Firmicutes	c__Bacilli	o__Bacillales	f__Paenibacillaceae	g__Ammoniphilus	s__
seq158	85	37	768	0	0	53	0	0	0	0	0	0	k__Bacteria	p__Proteobacteria	c__Betaproteobacteria	o__Burkholderiales	f__Comamonadaceae
seq159	139	427	205	45	81	25	0	0	0	0	19	0	k__Bacteria	p__Bacteroidetes	c__[Saprospirae]	o__[Saprospirales]	f__Chitinophagaceae	g__Flavisolibacter	s__
seq160	24	107	253	74	313	96	0	0	0	8	37	10	k__Bacteria	p__Firmicutes	c__Bacilli	o__Bacillales	f__Bacillaceae	g__Bacillus	s__
seq161	228	468	127	37	39	22	0	0	0	0	0	0	k__Bacteria	p__Proteobacteria	c__Alphaproteobacteria	o__Rhizobiales	f__Bradyrhizobiaceae	g__	s__
seq162	0	0	0	0	0	0	220	331	287	78	0	0	k__Bacteria	p__Proteobacteria	c__Alphaproteobacteria	o__Rickettsiales	f__mitochondria
seq163	59	39	46	59	73	0	0	90	49	66	322	112	k__Bacteria	p__Actinobacteria	c__Actinobacteria	o__Actinomycetales	f__Streptomycetaceae	g__Streptomyces	s__
seq164	56	444	127	108	38	43	7	14	16	19	23	17	k__Bacteria	p__Actinobacteria	c__Actinobacteria	o__Actinomycetales	f__Sporichthyaceae	g__	s__
seq165	103	492	143	17	43	0	0	14	0	24	26	49	k__Bacteria	p__Actinobacteria	c__Actinobacteria	o__Actinomycetales	f__Sporichthyaceae	g__	s__
seq166	0	231	0	33	0	0	72	99	48	200	158	68	k__Bacteria	p__Proteobacteria	c__Alphaproteobacteria	o__Rickettsiales	f__mitochondria
seq167	218	434	100	43	22	20	0	0	3	31	19	16	k__Bacteria	p__Proteobacteria	c__Alphaproteobacteria	o__Rhodospirillales	f__Acetobacteraceae	g__Roseococcus	s__
seq168	77	552	138	39	58	10	0	0	0	11	7	12	k__Bacteria	p__Bacteroidetes	c__[Saprospirae]	o__[Saprospirales]	f__Chitinophagaceae	g__Flavisolibacter	s__
seq169	50	0	831	0	0	22	0	0	0	0	0	0	k__Bacteria	p__Proteobacteria	c__Betaproteobacteria	o__Burkholderiales	f__Comamonadaceae
seq170	143	231	363	83	80	0	0	0	0	0	0	0	k__Bacteria	p__Proteobacteria	c__Betaproteobacteria
seq171	0	0	0	24	0	0	0	0	415	0	428	16	k__Bacteria	p__Bacteroidetes	c__[Saprospirae]	o__[Saprospirales]	f__Saprospiraceae	g__	s__
seq172	0	0	0	2	0	0	794	43	0	38	0	0	k__Bacteria	p__Proteobacteria	c__Gammaproteobacteria	o__Oceanospirillales	f__Oceanospirillaceae	g__	s__
seq173	609	39	158	8	0	34	0	0	0	9	4	8	k__Bacteria	p__Actinobacteria	c__Acidimicrobiia	o__Acidimicrobiales	f__	g__	s__
seq174	383	103	338	0	0	24	0	0	0	13	0	0	k__Bacteria	p__Actinobacteria	c__MB-A2-108	o__0319-7L14	f__	g__	s__
seq175	0	0	0	6	0	0	142	223	225	102	83	80	k__Bacteria	p__Cyanobacteria	c__Chloroplast	o__Streptophyta	f__	g__	s__
seq176	33	48	34	307	115	194	0	0	34	0	43	50	k__Bacteria	p__Actinobacteria	c__Actinobacteria	o__Actinomycetales	f__Microbacteriaceae	g__Microbacterium	s__
seq177	225	53	555	0	0	17	0	0	0	0	0	0	k__Bacteria	p__Bacteroidetes	c__Cytophagia	o__Cytophagales	f__Cytophagaceae	g__Adhaeribacter	s__
seq178	0	41	5	27	0	11	15	53	95	373	139	90	k__Bacteria	p__Proteobacteria	c__Alphaproteobacteria	o__Rhizobiales	f__Brucellaceae	g__Ochrobactrum	s__
seq179	16	28	6	0	7	111	0	0	0	38	124	515	k__Bacteria	p__Firmicutes	c__Bacilli	o__Bacillales	f__Paenibacillaceae	g__Paenibacillus	s__
seq180	0	50	0	4	0	0	0	57	0	622	61	46	k__Bacteria	p__Proteobacteria	c__Alphaproteobacteria	o__Rhizobiales	f__Hyphomicrobiaceae	g__Devosia	s__
seq181	63	127	60	153	148	80	14	14	9	26	85	37	k__Bacteria	p__Proteobacteria	c__Alphaproteobacteria	o__Rhizobiales	f__Hyphomicrobiaceae	g__Devosia	s__
seq182	173	267	83	49	78	37	0	0	0	52	43	28	k__Bacteria	p__Actinobacteria	c__Actinobacteria	o__Actinomycetales
seq183	529	101	123	20	15	0	0	3	0	12	0	0	k__Bacteria	p__Actinobacteria	c__Acidimicrobiia	o__Acidimicrobiales	f__	g__	s__
seq184	61	311	91	99	85	43	0	0	0	33	37	36	k__Bacteria	p__Proteobacteria	c__Alphaproteobacteria	o__Sphingomonadales	f__Sphingomonadaceae
seq185	0	0	0	25	0	0	0	0	358	0	408	0	k__Bacteria	p__Proteobacteria	c__Alphaproteobacteria	o__Rhodobacterales	f__Rhodobacteraceae	g__Marivita	s__
seq186	0	19	0	3	0	0	0	33	0	717	12	5	k__Bacteria	p__Actinobacteria	c__Actinobacteria	o__Actinomycetales
seq187	147	171	128	162	96	83	0	0	0	0	0	0	k__Bacteria	p__Proteobacteria	c__Betaproteobacteria	o__Burkholderiales	f__Oxalobacteraceae	g__	s__
seq188	0	164	172	88	88	143	0	0	0	52	0	74	k__Bacteria	p__Proteobacteria	c__Betaproteobacteria	o__Burkholderiales
seq189	0	44	0	0	0	0	0	0	57	45	605	29	k__Bacteria	p__Proteobacteria	c__Alphaproteobacteria	o__Rhizobiales	f__Rhizobiaceae	g__Sinorhizobium	s__
seq190	0	20	0	0	0	0	0	41	0	688	15	16	k__Bacteria	p__Actinobacteria	c__Actinobacteria	o__Actinomycetales	f__Streptomycetaceae	g__Streptomyces
seq191	0	79	89	94	108	129	25	0	26	21	125	81	k__Bacteria	p__Proteobacteria	c__Betaproteobacteria	o__Burkholderiales
seq192	40	39	32	80	150	357	0	0	0	0	42	36	k__Bacteria	p__Proteobacteria	c__Alphaproteobacteria	o__Sphingomonadales	f__Sphingomonadaceae
seq193	68	0	0	34	48	113	18	88	114	51	162	76	k__Bacteria	p__Actinobacteria	c__Actinobacteria	o__Actinomycetales	f__Actinosynnemataceae	g__Saccharothrix	s__
seq194	758	8	0	0	0	0	0	0	0	0	0	0	k__Archaea	p__Crenarchaeota	c__Thaumarchaeota	o__Nitrososphaerales	f__Nitrososphaeraceae	g__Candidatus Nitrososphaera	s__
seq195	0	58	19	107	204	146	0	0	0	27	199	0	k__Bacteria	p__Firmicutes	c__Bacilli	o__Bacillales
seq196	657	0	74	0	0	27	0	0	0	0	0	0	k__Bacteria	p__Actinobacteria	c__MB-A2-108	o__0319-7L14	f__	g__	s__
seq197	0	31	0	63	101	79	0	0	0	14	360	105	k__Bacteria	p__Firmicutes	c__Bacilli	o__Bacillales
seq198	393	143	102	20	22	38	0	0	0	13	13	7	k__Bacteria	p__Proteobacteria	c__Betaproteobacteria	o__	f__	g__	s__
seq199	0	25	0	0	0	0	0	34	0	659	17	9	k__Bacteria	p__Actinobacteria	c__Actinobacteria	o__Actinomycetales	f__Nocardioidaceae	g__Actinopolymorpha	s__
seq200	69	65	0	49	56	174	0	0	0	28	105	192	k__Bacteria	p__Firmicutes	c__Bacilli	o__Bacillales	f__Bacillaceae	g__Bacillus
seq201	82	192	74	81	160	74	0	0	9	18	15	26	k__Bacteria	p__Proteobacteria	c__Alphaproteobacteria	o__Sphingomonadales	f__Sphingomonadaceae	g__	s__
seq202	26	49	45	99	249	190	0	6	5	10	22	29	k__Bacteria	p__Proteobacteria	c__Alphaproteobacteria	o__Sphingomonadales	f__Sphingomonadaceae
seq203	128	241	92	123	143	0	0	0	0	0	0	0	k__Bacteria	p__Actinobacteria	c__Actinobacteria	o__Actinomycetales	f__Cellulomonadaceae	g__Cellulomonas	s__
seq204	0	0	0	0	0	0	107	161	187	110	101	59	k__Bacteria	p__Cyanobacteria	c__Chloroplast	o__Streptophyta	f__	g__	s__
seq205	0	109	86	238	180	94	0	0	0	17	0	0	k__Bacteria	p__Proteobacteria	c__Betaproteobacteria	o__Burkholderiales	f__Oxalobacteraceae	g__	s__
seq206	79	133	31	203	110	91	7	0	7	12	17	25	k__Bacteria	p__Actinobacteria	c__Actinobacteria	o__Actinomycetales	f__Micrococcaceae	g__	s__
seq207	34	45	18	82	20	312	0	8	12	24	45	111	k__Bacteria	p__Actinobacteria	c__Actinobacteria	o__Actinomycetales	f__Promicromonosporaceae	g__Xylanimicrobium
seq208	0	0	0	27	0	0	0	76	36	286	106	179	k__Bacteria	p__Actinobacteria	c__Actinobacteria	o__Actinomycetales	f__Pseudonocardiaceae	g__Saccharopolyspora	s__
seq209	0	0	0	0	0	0	0	0	0	652	57	0	k__Bacteria	p__Actinobacteria	c__Actinobacteria	o__Actinomycetales	f__Glycomycetaceae	g__Glycomyces	s__
seq210	67	89	31	41	49	104	0	8	0	17	263	39	k__Bacteria	p__Proteobacteria	c__Alphaproteobacteria	o__Rhizobiales	f__Bradyrhizobiaceae	g__Balneimonas	s__
seq211	128	287	185	34	38	32	0	0	0	0	0	0	k__Bacteria	p__Proteobacteria	c__Betaproteobacteria	o__Burkholderiales	f__Oxalobacteraceae	g__	s__
seq212	244	30	429	0	0	0	0	0	0	0	0	0	k__Archaea	p__Crenarchaeota	c__Thaumarchaeota	o__Nitrososphaerales	f__Nitrososphaeraceae	g__Candidatus Nitrososphaera	s__gargensis
seq213	50	44	0	0	0	0	0	37	53	463	29	25	k__Bacteria	p__Actinobacteria	c__Actinobacteria	o__Actinomycetales	f__Pseudonocardiaceae	g__Pseudonocardia	s__
seq214	215	0	195	0	0	284	0	0	0	0	0	0	k__Bacteria	p__Firmicutes	c__Bacilli	o__Lactobacillales	f__Lactobacillaceae	g__Lactobacillus
seq215	19	0	0	0	0	24	0	77	128	317	99	29	k__Bacteria	p__Actinobacteria	c__Actinobacteria	o__Actinomycetales	f__Pseudonocardiaceae	g__Pseudonocardia	s__
seq216	77	323	103	48	41	22	0	0	0	31	43	0	k__Bacteria	p__Proteobacteria	c__Betaproteobacteria	o__Burkholderiales
seq217	74	57	50	76	132	143	18	0	4	40	51	35	k__Bacteria	p__Proteobacteria	c__Alphaproteobacteria	o__Caulobacterales	f__Caulobacteraceae	g__Phenylobacterium	s__
seq218	0	22	0	5	0	0	8	42	43	499	46	14	k__Bacteria	p__Actinobacteria	c__Actinobacteria	o__Actinomycetales	f__Pseudonocardiaceae	g__Jiangella	s__
seq219	224	268	64	0	54	0	0	0	0	0	32	36	k__Bacteria	p__Proteobacteria	c__Alphaproteobacteria	o__Rhizobiales	f__Bradyrhizobiaceae	g__Balneimonas	s__
seq220	0	45	630	0	0	0	0	0	0	0	0	0	k__Bacteria	p__Proteobacteria	c__Betaproteobacteria	o__Burkholderiales	f__Comamonadaceae
seq221	121	52	344	50	59	39	0	0	0	0	0	0	k__Bacteria	p__Bacteroidetes	c__Cytophagia	o__Cytophagales	f__Cytophagaceae	g__Adhaeribacter	s__
seq222	0	225	0	0	0	0	0	0	0	178	150	105	k__Bacteria	p__Proteobacteria	c__Gammaproteobacteria	o__Pseudomonadales	f__Pseudomonadaceae	g__Pseudomonas	s__
seq223	0	12	0	76	183	236	0	0	0	0	92	52	k__Bacteria	p__Firmicutes	c__Bacilli	o__Bacillales	f__Bacillaceae	g__Bacillus
seq224	0	28	0	8	0	0	0	12	40	33	419	110	k__Bacteria	p__Proteobacteria	c__Betaproteobacteria	o__Burkholderiales	f__Alcaligenaceae	g__	s__
seq225	63	146	73	54	89	76	0	0	0	32	58	56	k__Bacteria	p__Proteobacteria	c__Alphaproteobacteria	o__Rhodospirillales	f__Rhodospirillaceae	g__Azospirillum	s__
seq226	54	92	81	80	154	26	0	26	14	78	18	24	k__Bacteria	p__Proteobacteria	c__Alphaproteobacteria	o__Sphingomonadales	f__Erythrobacteraceae	g__	s__
seq227	47	0	39	389	167	0	0	0	0	0	0	0	k__Bacteria	p__Firmicutes	c__Bacilli	o__Bacillales	f__Planococcaceae	g__Planomicrobium	s__
seq228	260	269	73	38	0	0	0	0	0	0	0	0	k__Bacteria	p__Proteobacteria	c__Alphaproteobacteria	o__Rhizobiales	f__Bradyrhizobiaceae	g__	s__
seq229	22	42	13	94	123	210	0	0	0	29	0	106	k__Bacteria	p__Firmicutes	c__Bacilli	o__Bacillales	f__Bacillaceae	g__Bacillus	s__badius
seq230	11	0	0	18	11	6	5	102	322	34	56	72	k__Bacteria	p__Actinobacteria	c__Actinobacteria	o__Actinomycetales	f__Pseudonocardiaceae	g__Amycolatopsis	s__thermoflava
seq231	0	10	0	0	0	0	0	26	52	445	81	23	k__Bacteria	p__Actinobacteria	c__Actinobacteria	o__Actinomycetales	f__Streptomycetaceae
seq232	26	103	0	333	78	71	0	0	0	0	0	20	k__Bacteria	p__Firmicutes	c__Bacilli	o__Bacillales	f__Planococcaceae
seq233	0	64	11	47	64	84	0	0	37	21	214	89	k__Bacteria	p__Proteobacteria	c__Betaproteobacteria	o__Methylophilales	f__Methylophilaceae
seq234	23	25	13	101	88	234	0	0	0	0	117	27	k__Bacteria	p__Actinobacteria	c__Actinobacteria	o__Actinomycetales	f__Microbacteriaceae	g__Microbacterium	s__
seq235	151	157	51	68	75	45	0	0	0	0	46	33	k__Bacteria	p__Actinobacteria	c__Actinobacteria	o__Actinomycetales	f__Microbacteriaceae	g__	s__
seq236	136	194	79	38	61	25	0	0	19	22	24	25	k__Bacteria	p__Proteobacteria	c__Alphaproteobacteria	o__Sphingomonadales	f__Sphingomonadaceae	g__Sphingomonas	s__
seq237	0	103	95	67	157	52	0	0	0	0	50	94	k__Bacteria	p__Firmicutes	c__Bacilli	o__Bacillales	f__Bacillaceae	g__Bacillus
seq238	0	0	0	0	3	31	0	0	0	0	584	0	k__Bacteria	p__Bacteroidetes	c__[Saprospirae]	o__[Saprospirales]	f__Chitinophagaceae	g__Chitinophaga	s__
seq239	41	312	83	33	51	13	0	0	0	34	15	35	k__Bacteria	p__Actinobacteria	c__Actinobacteria	o__Actinomycetales	f__Sporichthyaceae	g__	s__
seq240	110	254	153	28	27	23	0	0	0	0	0	18	k__Bacteria	p__Proteobacteria	c__Betaproteobacteria	o__Burkholderiales	f__Oxalobacteraceae	g__	s__
seq241	42	120	64	84	239	38	0	2	0	2	10	10	k__Bacteria	p__Bacteroidetes	c__[Saprospirae]	o__[Saprospirales]	f__Chitinophagaceae	g__Flavisolibacter	s__
seq242	59	146	319	19	43	0	0	0	0	23	0	0	k__Bacteria	p__Firmicutes	c__Bacilli	o__Bacillales	f__Paenibacillaceae	g__Ammoniphilus	s__
seq243	32	50	0	82	64	161	0	0	0	26	126	68	k__Bacteria	p__Actinobacteria	c__Actinobacteria	o__Actinomycetales	f__Nocardioidaceae	g__	s__
seq244	39	360	58	37	77	0	0	0	0	7	17	7	k__Bacteria	p__Bacteroidetes	c__[Saprospirae]	o__[Saprospirales]	f__Chitinophagaceae	g__Flavisolibacter	s__
seq245	0	0	0	150	122	176	0	0	0	0	68	86	k__Bacteria	p__Firmicutes	c__Bacilli	o__Bacillales	f__Bacillaceae
seq246	0	0	0	0	601	0	0	0	0	0	0	0	k__Bacteria	p__Firmicutes	c__Clostridia	o__Clostridiales
seq247	0	0	0	0	0	55	0	0	0	0	0	545	k__Bacteria	p__Firmicutes	c__Bacilli	o__Bacillales	f__Bacillaceae	g__Bacillus	s__
seq248	116	23	415	0	0	41	0	0	0	0	0	3	k__Bacteria	p__Proteobacteria	c__Gammaproteobacteria
seq249	0	19	0	14	7	106	6	56	19	28	283	58	k__Bacteria	p__Proteobacteria	c__Alphaproteobacteria	o__Sphingomonadales	f__Sphingomonadaceae	g__	s__
seq250	0	0	0	0	150	69	0	0	0	0	275	100	k__Bacteria	p__Firmicutes	c__Bacilli	o__Bacillales	f__	g__	s__
seq251	14	45	0	0	0	0	0	45	32	383	37	35	k__Bacteria	p__Proteobacteria	c__Alphaproteobacteria	o__Rhizobiales	f__Phyllobacteriaceae
seq252	8	11	0	313	179	40	0	0	0	0	0	38	k__Bacteria	p__Firmicutes	c__Bacilli	o__Bacillales	f__Planococcaceae	g__Planomicrobium	s__
seq253	15	0	561	0	0	12	0	0	0	0	0	0	k__Bacteria	p__Verrucomicrobia	c__[Pedosphaerae]	o__[Pedosphaerales]	f__	g__	s__
seq254	58	59	409	0	0	62	0	0	0	0	0	0	k__Bacteria	p__Actinobacteria	c__Rubrobacteria	o__Rubrobacterales	f__Rubrobacteraceae	g__Rubrobacter	s__
seq255	8	48	19	66	389	35	0	0	0	0	0	16	k__Bacteria	p__Bacteroidetes	c__Cytophagia	o__Cytophagales	f__Cytophagaceae
seq256	43	249	82	51	55	21	0	0	0	22	31	24	k__Bacteria	p__Proteobacteria	c__Gammaproteobacteria	o__Xanthomonadales	f__Xanthomonadaceae	g__Lysobacter	s__
seq257	13	0	0	12	0	4	0	29	0	377	19	122	k__Bacteria	p__Actinobacteria	c__Actinobacteria	o__Actinomycetales	f__Pseudonocardiaceae
seq258	59	27	22	66	283	61	8	2	8	9	0	25	k__Bacteria	p__Proteobacteria	c__Alphaproteobacteria	o__Sphingomonadales	f__Erythrobacteraceae
seq259	73	119	0	53	68	75	0	0	0	64	75	43	k__Bacteria	p__Actinobacteria	c__Actinobacteria	o__Actinomycetales	f__Cellulomonadaceae	g__Cellulomonas	s__
seq260	39	72	79	62	147	82	0	0	0	0	58	30	k__Bacteria	p__Firmicutes	c__Bacilli	o__Bacillales	f__Paenibacillaceae	g__Ammoniphilus	s__
seq261	113	298	103	10	16	21	0	0	0	0	0	7	k__Bacteria	p__Verrucomicrobia	c__[Pedosphaerae]	o__[Pedosphaerales]
seq262	0	9	0	0	0	0	0	54	16	23	432	28	k__Bacteria	p__Bacteroidetes	c__Sphingobacteriia	o__Sphingobacteriales	f__Sphingobacteriaceae	g__Olivibacter	s__
seq263	69	123	84	40	64	54	0	22	0	22	42	38	k__Bacteria	p__Proteobacteria	c__Alphaproteobacteria	o__Rhizobiales	f__Bradyrhizobiaceae	g__Balneimonas	s__
seq264	27	25	0	91	96	164	0	0	0	25	56	74	k__Bacteria	p__Firmicutes	c__Bacilli	o__Bacillales	f__Paenibacillaceae	g__	s__
seq265	0	22	0	17	32	0	0	0	28	39	225	194	k__Bacteria	p__Proteobacteria	c__Alphaproteobacteria	o__Sphingomonadales	f__Sphingomonadaceae	g__	s__
seq266	175	150	98	37	0	26	0	6	0	30	14	18	k__Bacteria	p__Actinobacteria	c__Actinobacteria	o__Actinomycetales	f__Geodermatophilaceae
seq267	47	116	31	114	195	36	0	0	0	0	13	0	k__Bacteria	p__Bacteroidetes	c__Sphingobacteriia	o__Sphingobacteriales	f__Sphingobacteriaceae	g__	s__
seq268	0	27	0	0	0	78	0	0	26	0	168	253	k__Bacteria	p__Firmicutes	c__Bacilli	o__Bacillales	f__Paenibacillaceae	g__	s__
seq269	0	0	62	62	192	165	0	0	0	0	70	0	k__Bacteria	p__Firmicutes	c__Bacilli	o__Bacillales	f__Paenibacillaceae	g__	s__
seq270	119	255	77	25	43	0	0	0	0	0	0	20	k__Bacteria	p__Bacteroidetes	c__[Saprospirae]	o__[Saprospirales]	f__Chitinophagaceae	g__Flavisolibacter	s__
seq271	0	21	0	10	0	0	4	58	24	40	300	82	k__Bacteria	p__Proteobacteria	c__Betaproteobacteria	o__Burkholderiales	f__Alcaligenaceae
seq272	65	349	99	13	12	0	0	0	0	0	0	0	k__Bacteria	p__Bacteroidetes	c__[Saprospirae]	o__[Saprospirales]	f__Chitinophagaceae	g__Flavisolibacter	s__
seq273	0	122	0	0	123	102	0	0	0	0	48	142	k__Bacteria	p__Firmicutes	c__Bacilli	o__Bacillales	f__Bacillaceae	g__Bacillus	s__foraminis
seq274	0	5	0	0	0	0	5	0	261	0	263	2	k__Bacteria	p__Chlorobi	c__OPB56	o__	f__	g__	s__
seq275	65	353	83	24	10	0	0	0	0	0	0	0	k__Bacteria	p__Bacteroidetes	c__[Saprospirae]	o__[Saprospirales]	f__Chitinophagaceae	g__Flavisolibacter	s__
seq276	0	74	22	145	94	83	0	0	0	18	32	66	k__Bacteria	p__Firmicutes	c__Bacilli	o__Bacillales	f__Planococcaceae
seq277	75	0	441	0	0	15	0	0	0	0	0	0	k__Bacteria	p__Bacteroidetes	c__Cytophagia	o__Cytophagales	f__Cytophagaceae	g__Adhaeribacter	s__
seq278	175	214	61	18	16	25	0	0	0	0	21	0	k__Bacteria	p__Proteobacteria	c__Alphaproteobacteria	o__Rhizobiales	f__Bradyrhizobiaceae
seq279	31	105	21	117	57	100	0	0	6	11	53	29	k__Bacteria	p__Actinobacteria	c__Actinobacteria	o__Actinomycetales	f__Nocardioidaceae	g__	s__
seq280	0	49	0	36	0	22	0	0	35	68	172	148	k__Bacteria	p__Proteobacteria	c__Deltaproteobacteria	o__Myxococcales
seq281	0	63	41	132	141	56	0	0	0	0	0	96	k__Bacteria	p__Proteobacteria	c__Betaproteobacteria	o__Burkholderiales	f__Oxalobacteraceae
seq282	44	284	119	28	35	6	0	0	0	0	4	8	k__Bacteria	p__[Thermi]	c__Deinococci	o__Deinococcales	f__Deinococcaceae	g__Deinococcus	s__
seq283	47	33	22	18	48	187	0	0	0	42	131	0	k__Bacteria	p__Proteobacteria	c__Alphaproteobacteria	o__Rhizobiales	f__Bradyrhizobiaceae	g__Balneimonas	s__
seq284	148	353	21	0	0	0	0	0	0	0	2	3	k__Bacteria	p__Verrucomicrobia	c__[Pedosphaerae]	o__[Pedosphaerales]
seq285	0	0	0	0	0	0	0	19	32	316	87	71	k__Bacteria	p__Actinobacteria	c__Actinobacteria	o__Actinomycetales	f__Mycobacteriaceae	g__Mycobacterium	s__
seq286	274	208	0	22	0	19	0	0	0	0	0	0	k__Bacteria	p__Actinobacteria	c__Actinobacteria	o__Actinomycetales	f__Geodermatophilaceae	g__Geodermatophilus	s__
seq287	68	107	0	100	189	34	0	0	0	0	0	23	k__Bacteria	p__Firmicutes	c__Bacilli	o__Bacillales	f__Bacillaceae	g__Bacillus
seq288	0	36	0	0	20	0	0	51	0	215	63	136	k__Bacteria	p__Actinobacteria	c__Actinobacteria	o__Actinomycetales	f__Pseudonocardiaceae	g__Saccharopolyspora	s__
seq289	134	0	107	0	156	123	0	0	0	0	0	0	k__Bacteria	p__Firmicutes	c__Bacilli	o__Lactobacillales
seq290	306	112	101	0	0	0	0	0	0	0	0	0	k__Bacteria	p__Actinobacteria	c__Actinobacteria	o__Actinomycetales	f__Sporichthyaceae	g__	s__
seq291	0	0	0	90	0	0	146	162	121	0	0	0	k__Bacteria	p__Proteobacteria	c__Epsilonproteobacteria	o__Campylobacterales	f__Helicobacteraceae	g__	s__
seq292	121	241	123	13	0	0	0	0	0	20	0	0	k__Bacteria	p__Chloroflexi	c__Chloroflexi	o__AKIW781	f__	g__	s__
seq293	0	61	68	72	146	109	0	0	0	18	44	0	k__Bacteria	p__Firmicutes	c__Bacilli	o__Bacillales	f__Bacillaceae	g__Bacillus	s__
seq294	0	95	0	65	274	81	0	0	0	0	0	0	k__Bacteria	p__Bacteroidetes	c__Cytophagia	o__Cytophagales	f__Cytophagaceae	g__Dyadobacter	s__
seq295	318	50	42	0	97	0	0	0	0	0	0	0	k__Bacteria	p__Actinobacteria	c__Actinobacteria	o__Actinomycetales	f__Actinosynnemataceae	g__Saccharothrix	s__
seq296	132	36	319	0	0	13	0	0	0	7	0	0	k__Bacteria	p__Actinobacteria	c__MB-A2-108	o__0319-7L14	f__	g__	s__
seq297	95	108	42	35	126	34	0	0	0	13	24	29	k__Bacteria	p__Proteobacteria	c__Alphaproteobacteria	o__Sphingomonadales	f__Sphingomonadaceae	g__Sphingomonas	s__
seq298	107	192	58	11	92	25	0	0	0	0	20	0	k__Bacteria	p__Bacteroidetes	c__[Saprospirae]	o__[Saprospirales]	f__Chitinophagaceae	g__Flavisolibacter	s__
seq299	0	21	0	0	0	0	0	43	0	406	16	19	k__Bacteria	p__Firmicutes	c__Bacilli	o__Bacillales	f__Paenibacillaceae	g__Paenibacillus	s__lautus
seq300	0	0	0	0	0	0	0	0	0	0	58	447	k__Bacteria	p__Firmicutes	c__Bacilli	o__Bacillales	f__Bacillaceae	g__Bacillus
seq301	162	50	292	0	0	0	0	0	0	0	0	0	k__Bacteria	p__Actinobacteria	c__Rubrobacteria	o__Rubrobacterales	f__Rubrobacteraceae	g__Rubrobacter	s__
seq302	223	0	0	0	0	0	0	280	0	0	0	0	k__Bacteria	p__Actinobacteria	c__Actinobacteria	o__Actinomycetales	f__Actinosynnemataceae	g__Saccharothrix	s__
seq303	30	54	33	114	76	81	0	0	0	0	32	82	k__Bacteria	p__Proteobacteria	c__Betaproteobacteria	o__Burkholderiales	f__Oxalobacteraceae	g__	s__
seq304	149	150	97	14	31	15	0	2	0	14	19	10	k__Bacteria	p__Proteobacteria	c__Betaproteobacteria	o__Burkholderiales
seq305	46	105	74	152	66	44	0	0	0	12	0	0	k__Bacteria	p__Proteobacteria	c__Betaproteobacteria	o__Burkholderiales	f__Oxalobacteraceae
seq306	205	93	59	32	32	0	0	0	0	42	33	0	k__Bacteria	p__Actinobacteria	c__Actinobacteria	o__Actinomycetales	f__Nocardioidaceae	g__	s__
seq307	377	17	78	0	0	23	0	0	0	0	0	0	k__Bacteria	p__Actinobacteria	c__Thermoleophilia	o__Solirubrobacterales	f__	g__	s__
seq308	60	40	54	0	179	162	0	0	0	0	0	0	k__Bacteria	p__Firmicutes	c__Bacilli	o__Bacillales	f__Bacillaceae	g__Bacillus	s__
seq309	154	167	109	14	16	15	0	0	0	18	0	0	k__Bacteria	p__Gemmatimonadetes	c__Gemm-3	o__	f__	g__	s__
seq310	243	37	168	0	0	43	0	0	0	0	0	0	k__Bacteria	p__Actinobacteria	c__Thermoleophilia	o__Gaiellales	f__Gaiellaceae	g__	s__
seq311	0	0	0	89	42	148	0	0	0	19	25	168	k__Bacteria	p__Firmicutes	c__Bacilli	o__Bacillales	f__Bacillaceae	g__Bacillus	s__badius
seq312	380	22	62	0	0	16	0	0	0	9	0	0	k__Bacteria	p__Actinobacteria	c__Acidimicrobiia	o__Acidimicrobiales	f__	g__	s__
seq313	181	0	134	0	72	101	0	0	0	0	0	0	k__Bacteria	p__Proteobacteria	c__Alphaproteobacteria	o__Rhodospirillales	f__Acetobacteraceae
seq314	430	3	36	0	0	17	0	0	0	0	0	0	k__Bacteria	p__Gemmatimonadetes	c__Gemm-3	o__	f__	g__	s__
seq315	52	96	25	60	94	27	10	0	0	40	42	38	k__Bacteria	p__Actinobacteria	c__Actinobacteria	o__Actinomycetales	f__Micrococcaceae	g__Microbispora	s__rosea
seq316	0	6	0	27	0	0	0	0	204	0	203	43	k__Bacteria	p__Proteobacteria	c__Alphaproteobacteria	o__Rhodobacterales	f__Rhodobacteraceae	g__Marivita	s__
seq317	0	55	0	49	0	0	101	103	49	57	44	23	k__Bacteria	p__Firmicutes	c__Clostridia	o__Clostridiales	f__Lachnospiraceae	g__	s__
seq318	0	0	0	17	0	148	0	0	0	0	43	271	k__Bacteria	p__Proteobacteria	c__Alphaproteobacteria	o__Sphingomonadales	f__Sphingomonadaceae	g__	s__
seq319	224	200	37	17	0	0	0	0	0	0	0	0	k__Bacteria	p__Proteobacteria	c__Alphaproteobacteria	o__Rhizobiales	f__Bradyrhizobiaceae	g__	s__
seq320	109	187	39	81	44	6	0	0	0	0	11	0	k__Bacteria	p__Bacteroidetes	c__Cytophagia	o__Cytophagales	f__Cytophagaceae	g__	s__
seq321	462	10	0	0	0	0	0	0	0	4	0	0	k__Archaea	p__Crenarchaeota	c__Thaumarchaeota	o__Nitrososphaerales	f__Nitrososphaeraceae	g__Candidatus Nitrososphaera	s__gargensis
seq322	321	32	95	0	0	28	0	0	0	0	0	0	k__Bacteria	p__Proteobacteria	c__Alphaproteobacteria	o__Sphingomonadales	f__Sphingomonadaceae	g__Kaistobacter	s__
seq323	300	19	147	0	0	0	0	0	0	0	0	8	k__Bacteria	p__Actinobacteria	c__Acidimicrobiia	o__Acidimicrobiales	f__	g__	s__
seq324	0	0	0	0	0	0	96	107	87	78	64	42	k__Bacteria	p__Cyanobacteria	c__Chloroplast	o__Streptophyta	f__	g__	s__
seq325	0	59	141	36	127	52	0	0	0	0	58	0	k__Bacteria	p__Firmicutes	c__Bacilli	o__Bacillales
seq326	89	54	302	0	0	25	0	0	0	0	0	0	k__Bacteria	p__Proteobacteria	c__Alphaproteobacteria	o__Sphingomonadales	f__Sphingomonadaceae
seq327	0	0	0	43	0	43	0	8	0	30	162	183	k__Bacteria	p__Firmicutes	c__Bacilli	o__Bacillales	f__Paenibacillaceae	g__	s__
seq328	150	15	303	0	0	0	0	0	0	0	0	0	k__Bacteria	p__Actinobacteria	c__Acidimicrobiia	o__Acidimicrobiales	f__	g__	s__
seq329	253	54	145	0	6	0	0	0	0	6	0	0	k__Bacteria	p__Actinobacteria	c__Acidimicrobiia	o__Acidimicrobiales	f__	g__	s__
seq330	160	142	161	0	0	0	0	0	0	0	0	0	k__Bacteria	p__Gemmatimonadetes	c__Gemm-3	o__	f__	g__	s__
seq331	325	27	40	23	13	10	0	7	4	0	0	13	k__Bacteria	p__Actinobacteria	c__Acidimicrobiia	o__Acidimicrobiales	f__	g__	s__
seq332	0	27	0	47	188	65	0	8	0	0	114	12	k__Bacteria	p__Firmicutes	c__Bacilli	o__Bacillales	f__Bacillaceae
seq333	0	0	0	0	0	0	0	15	0	48	180	217	k__Bacteria	p__Firmicutes	c__Bacilli	o__Bacillales
seq334	23	8	8	31	27	215	0	0	0	13	26	108	k__Bacteria	p__Proteobacteria	c__Alphaproteobacteria	o__Sphingomonadales	f__Sphingomonadaceae	g__	s__
seq335	171	71	47	24	29	66	0	6	4	6	13	19	k__Bacteria	p__Proteobacteria	c__Alphaproteobacteria	o__Rhodospirillales	f__Acetobacteraceae	g__	s__
seq336	0	43	0	0	19	13	0	26	0	334	0	17	k__Bacteria	p__Actinobacteria	c__Actinobacteria	o__Actinomycetales	f__Nocardiaceae	g__Rhodococcus	s__
seq337	0	0	0	0	450	0	0	0	0	0	0	0	k__Bacteria	p__Firmicutes	c__Clostridia	o__Clostridiales
seq338	0	0	0	37	0	42	0	0	6	0	54	310	k__Bacteria	p__Firmicutes	c__Bacilli	o__Bacillales	f__Paenibacillaceae	g__Paenibacillus	s__
seq339	0	0	0	99	289	27	0	0	0	0	0	32	k__Bacteria	p__Firmicutes	c__Bacilli	o__Bacillales	f__Planococcaceae
seq340	371	0	24	0	0	50	0	0	0	0	0	0	k__Bacteria	p__Actinobacteria	c__Acidimicrobiia	o__Acidimicrobiales	f__	g__	s__
seq341	56	215	62	58	50	0	0	0	0	0	0	0	k__Bacteria	p__Proteobacteria	c__Betaproteobacteria	o__Burkholderiales	f__Oxalobacteraceae
seq342	0	0	0	0	86	0	93	37	0	0	187	36	k__Bacteria	p__Actinobacteria	c__Actinobacteria	o__Actinomycetales	f__Streptomycetaceae	g__Streptomyces	s__
seq343	22	92	83	0	112	79	0	0	0	23	0	26	k__Bacteria	p__Firmicutes	c__Bacilli	o__Bacillales	f__Bacillaceae
seq344	0	23	0	0	0	0	0	18	22	113	245	15	k__Bacteria	p__Proteobacteria	c__Alphaproteobacteria	o__Rhizobiales	f__Rhizobiaceae
seq345	0	0	0	0	436	0	0	0	0	0	0	0	k__Bacteria	p__Proteobacteria	c__Gammaproteobacteria	o__Enterobacteriales	f__Enterobacteriaceae	g__Plesiomonas	s__shigelloides
seq346	0	38	0	181	153	37	0	0	0	0	0	26	k__Bacteria	p__Bacteroidetes	c__Cytophagia	o__Cytophagales	f__Cytophagaceae
seq347	84	117	123	32	58	12	0	0	0	0	0	8	k__Bacteria	p__Proteobacteria	c__Betaproteobacteria	o__Burkholderiales	f__Oxalobacteraceae	g__	s__
seq348	19	9	8	26	9	167	0	33	0	44	59	59	k__Bacteria	p__Actinobacteria	c__Actinobacteria	o__Actinomycetales	f__Microbacteriaceae	g__Microbacterium	s__
seq349	254	121	49	0	0	5	0	0	0	3	0	0	k__Bacteria	p__Verrucomicrobia	c__[Pedosphaerae]	o__[Pedosphaerales]	f__Ellin517	g__	s__
seq350	36	49	18	141	111	77	0	0	0	0	0	0	k__Bacteria	p__Actinobacteria	c__Actinobacteria	o__Actinomycetales	f__Micrococcaceae
seq351	0	16	0	36	26	46	0	0	0	35	62	209	k__Bacteria	p__Firmicutes	c__Bacilli	o__Bacillales	f__Bacillaceae
seq352	8	25	7	17	10	65	0	29	0	128	38	102	k__Bacteria	p__Proteobacteria	c__Alphaproteobacteria	o__Rhodospirillales	f__Rhodospirillaceae	g__Skermanella	s__xinjiangensis
seq353	0	0	0	31	0	46	0	18	0	72	62	197	k__Bacteria	p__Firmicutes	c__Bacilli	o__Bacillales	f__Bacillaceae	g__Bacillus
seq354	0	18	18	58	101	102	0	0	0	0	76	52	k__Bacteria	p__Firmicutes	c__Bacilli	o__Bacillales	f__Bacillaceae	g__Bacillus	s__
seq355	14	0	0	0	0	6	49	40	0	235	50	29	k__Bacteria	p__Actinobacteria	c__Actinobacteria	o__Actinomycetales	f__Thermomonosporaceae
seq356	122	29	19	11	19	12	0	24	5	142	25	14	k__Bacteria	p__Chloroflexi	c__Thermomicrobia	o__JG30-KF-CM45	f__	g__	s__
seq357	35	79	24	33	90	15	0	0	5	63	54	23	k__Bacteria	p__Firmicutes	c__Bacilli	o__Bacillales	f__Alicyclobacillaceae	g__Alicyclobacillus	s__
seq358	8	13	0	15	16	47	0	17	44	16	154	91	k__Bacteria	p__Proteobacteria	c__Alphaproteobacteria	o__Rhizobiales	f__Hyphomicrobiaceae	g__Devosia	s__
seq359	52	80	21	25	191	50	0	0	0	0	0	0	k__Bacteria	p__Proteobacteria	c__Alphaproteobacteria	o__Sphingomonadales	f__Sphingomonadaceae
seq360	42	109	24	59	160	8	0	0	0	5	4	7	k__Bacteria	p__Bacteroidetes	c__Cytophagia	o__Cytophagales	f__Cytophagaceae	g__	s__
seq361	365	0	35	0	0	17	0	0	0	0	0	0	k__Bacteria	p__Actinobacteria	c__Thermoleophilia	o__Gaiellales	f__Gaiellaceae	g__	s__
seq362	65	0	339	0	0	13	0	0	0	0	0	0	k__Bacteria	p__Actinobacteria	c__MB-A2-108	o__0319-7L14	f__	g__	s__
seq363	183	27	181	0	0	25	0	0	0	0	0	0	k__Bacteria	p__Actinobacteria	c__Thermoleophilia	o__Solirubrobacterales	f__	g__	s__
seq364	0	13	0	0	0	0	0	16	0	378	9	0	k__Bacteria	p__Actinobacteria	c__Actinobacteria	o__Actinomycetales	f__Nocardioidaceae	g__Actinopolymorpha	s__
seq365	0	176	0	0	0	0	227	0	0	0	12	0	k__Bacteria	p__Actinobacteria	c__Actinobacteria	o__Actinomycetales	f__Microbacteriaceae	g__Candidatus Aquiluna	s__rubra
seq366	89	113	165	0	0	0	0	0	0	0	40	0	k__Bacteria	p__Proteobacteria	c__Betaproteobacteria
seq367	39	145	218	0	0	0	0	0	0	0	0	5	k__Bacteria	p__Proteobacteria	c__Betaproteobacteria	o__Burkholderiales	f__Oxalobacteraceae	g__	s__
seq368	139	113	65	19	35	25	0	0	0	0	9	0	k__Bacteria	p__Proteobacteria	c__Alphaproteobacteria	o__Sphingomonadales	f__Sphingomonadaceae
seq369	29	26	0	75	112	115	0	0	0	0	20	26	k__Bacteria	p__Firmicutes	c__Bacilli	o__Bacillales
seq370	0	10	0	0	0	0	0	31	30	274	30	27	k__Bacteria	p__Actinobacteria	c__Actinobacteria	o__Actinomycetales	f__Pseudonocardiaceae	g__Saccharopolyspora	s__
seq371	331	19	33	7	0	11	0	0	0	0	0	0	k__Bacteria	p__Actinobacteria	c__Acidimicrobiia	o__Acidimicrobiales	f__	g__	s__
seq372	34	114	41	42	158	0	0	0	0	0	7	5	k__Bacteria	p__Bacteroidetes	c__Cytophagia	o__Cytophagales	f__Cytophagaceae	g__Adhaeribacter	s__
seq373	30	30	0	8	23	26	0	30	46	37	146	25	k__Bacteria	p__Actinobacteria	c__Actinobacteria	o__Actinomycetales	f__Actinosynnemataceae	g__Saccharothrix	s__
seq374	0	337	0	0	0	0	0	32	0	32	0	0	k__Bacteria	p__Proteobacteria	c__Gammaproteobacteria	o__Vibrionales	f__Pseudoalteromonadaceae	g__Pseudoalteromonas	s__
seq375	0	25	0	0	0	0	0	33	0	307	21	15	k__Bacteria	p__Proteobacteria	c__Alphaproteobacteria	o__Rhizobiales	f__Phyllobacteriaceae
seq376	20	0	0	0	0	332	0	0	0	0	0	48	k__Bacteria	p__Proteobacteria	c__Alphaproteobacteria	o__Sphingomonadales	f__Sphingomonadaceae	g__	s__
seq377	397	0	0	0	0	0	0	0	0	0	0	0	k__Archaea	p__Crenarchaeota	c__Thaumarchaeota	o__Nitrososphaerales	f__Nitrososphaeraceae	g__Candidatus Nitrososphaera
seq378	0	17	0	0	9	0	0	0	20	6	333	12	k__Bacteria	p__Proteobacteria	c__Alphaproteobacteria	o__Rhizobiales
seq379	0	0	0	107	182	106	0	0	0	0	0	0	k__Bacteria	p__Firmicutes	c__Bacilli	o__Bacillales	f__Bacillaceae	g__Bacillus
seq380	134	175	84	0	0	0	0	0	0	0	0	0	k__Bacteria	p__Chloroflexi	c__Chloroflexi	o__AKIW781	f__	g__	s__
seq381	42	31	20	53	72	60	0	0	0	34	61	20	k__Bacteria	p__Firmicutes	c__Bacilli	o__Bacillales	f__Bacillaceae	g__Bacillus
seq382	79	0	297	0	0	16	0	0	0	0	0	0	k__Bacteria	p__Chloroflexi	c__Chloroflexi	o__AKIW781	f__	g__	s__
seq383	0	0	0	64	38	131	0	0	0	31	57	71	k__Bacteria	p__Proteobacteria	c__Betaproteobacteria	o__Burkholderiales	f__Oxalobacteraceae	g__	s__
seq384	164	81	26	54	40	24	0	0	0	0	0	0	k__Bacteria	p__Actinobacteria	c__Actinobacteria	o__Actinomycetales	f__Micrococcaceae
seq385	29	58	88	16	70	43	0	0	0	18	43	23	k__Bacteria	p__Proteobacteria	c__Alphaproteobacteria	o__Rhizobiales	f__Bradyrhizobiaceae	g__Balneimonas	s__
seq386	285	86	0	0	0	0	0	0	0	11	0	4	k__Bacteria	p__Proteobacteria	c__Gammaproteobacteria	o__Xanthomonadales	f__Xanthomonadaceae	g__Stenotrophomonas	s__acidaminiphila
seq387	31	18	15	25	130	66	0	0	10	11	48	27	k__Bacteria	p__Proteobacteria	c__Alphaproteobacteria	o__Caulobacterales	f__Caulobacteraceae	g__Mycoplana	s__
seq388	128	127	20	14	19	22	0	0	0	20	20	9	k__Bacteria	p__Proteobacteria	c__Alphaproteobacteria	o__Rhodobacterales	f__Rhodobacteraceae	g__Rubellimicrobium	s__
seq389	50	96	0	0	0	66	53	0	0	27	62	23	k__Bacteria	p__Proteobacteria	c__Alphaproteobacteria	o__Rhizobiales	f__Bradyrhizobiaceae	g__Balneimonas	s__
seq390	218	30	80	8	0	36	0	0	0	0	0	4	k__Bacteria	p__Proteobacteria	c__Deltaproteobacteria	o__Myxococcales	f__Haliangiaceae	g__	s__
seq391	112	187	77	0	0	0	0	0	0	0	0	0	k__Bacteria	p__Bacteroidetes	c__[Saprospirae]	o__[Saprospirales]	f__Chitinophagaceae	g__Flavisolibacter	s__
seq392	40	196	62	21	21	0	0	0	0	30	6	0	k__Bacteria	p__Proteobacteria	c__Betaproteobacteria	o__Burkholderiales
seq393	0	0	0	185	0	0	0	0	15	0	26	149	k__Bacteria	p__Proteobacteria	c__Alphaproteobacteria	o__BD7-3	f__	g__	s__
seq394	46	79	236	0	0	0	0	0	0	9	0	0	k__Bacteria	p__Verrucomicrobia	c__Opitutae	o__Opitutales	f__Opitutaceae	g__Opitutus	s__
seq395	0	6	0	0	0	0	0	203	0	161	0	0	k__Bacteria	p__Proteobacteria	c__Alphaproteobacteria	o__Rhodobacterales	f__Rhodobacteraceae
seq396	88	88	19	34	127	6	0	0	0	4	2	0	k__Bacteria	p__Bacteroidetes	c__Cytophagia	o__Cytophagales	f__Cytophagaceae	g__Adhaeribacter	s__
seq397	20	9	272	21	16	17	0	0	0	0	5	7	k__Bacteria	p__Proteobacteria	c__Betaproteobacteria	o__Burkholderiales	f__Comamonadaceae
seq398	0	0	0	0	0	0	367	0	0	0	0	0	k__Bacteria	p__Actinobacteria	c__Actinobacteria	o__Actinomycetales	f__Microbacteriaceae	g__	s__
seq399	0	60	0	20	0	0	59	64	38	56	36	33	k__Bacteria	p__Proteobacteria	c__Gammaproteobacteria	o__Enterobacteriales	f__Enterobacteriaceae
seq400	319	0	34	0	0	12	0	0	0	0	0	0	k__Bacteria	p__Actinobacteria	c__Acidimicrobiia	o__Acidimicrobiales	f__	g__	s__
seq401	12	70	5	47	0	0	64	49	26	37	28	27	k__Bacteria	p__Firmicutes	c__Clostridia	o__Clostridiales	f__Clostridiaceae	g__SMB53	s__
seq402	21	51	0	16	56	58	0	0	0	18	42	103	k__Bacteria	p__Firmicutes	c__Bacilli	o__Bacillales	f__Bacillaceae	g__Bacillus	s__humi
seq403	0	14	0	23	0	0	0	0	0	0	46	282	k__Bacteria	p__Proteobacteria	c__Gammaproteobacteria	o__Pseudomonadales	f__Pseudomonadaceae
seq404	173	90	0	40	0	0	0	9	0	50	0	0	k__Bacteria	p__Actinobacteria	c__Actinobacteria	o__Actinomycetales	f__Geodermatophilaceae	g__	s__
seq405	184	51	102	24	0	0	0	0	0	0	0	0	k__Bacteria	p__Proteobacteria	c__Betaproteobacteria	o__Burkholderiales	f__Comamonadaceae
seq406	22	16	19	54	135	56	0	0	0	0	59	0	k__Bacteria	p__Firmicutes	c__Bacilli	o__Bacillales	f__Bacillaceae	g__Bacillus	s__
seq407	34	7	312	0	0	5	0	0	0	0	0	0	k__Bacteria	p__Bacteroidetes	c__[Saprospirae]	o__[Saprospirales]	f__Chitinophagaceae
seq408	288	29	22	3	0	13	0	0	0	0	0	0	k__Bacteria	p__Chloroflexi	c__Thermomicrobia	o__JG30-KF-CM45	f__	g__	s__
seq409	17	0	15	0	6	317	0	0	0	0	0	0	k__Bacteria	p__Bacteroidetes	c__[Saprospirae]	o__[Saprospirales]	f__Chitinophagaceae
seq410	0	0	0	0	352	0	0	0	0	0	0	0	k__Bacteria	p__Fusobacteria	c__Fusobacteriia	o__Fusobacteriales	f__Fusobacteriaceae	g__Cetobacterium	s__somerae
seq411	76	118	48	24	30	0	0	0	0	15	18	20	k__Bacteria	p__Proteobacteria	c__Alphaproteobacteria	o__Rhodobacterales	f__Rhodobacteraceae	g__Rubellimicrobium	s__
seq412	140	33	144	0	0	32	0	0	0	0	0	0	k__Bacteria	p__Actinobacteria	c__Acidimicrobiia	o__Acidimicrobiales	f__	g__	s__
seq413	348	0	0	0	0	0	0	0	0	0	0	0	k__Bacteria	p__Actinobacteria	c__Acidimicrobiia	o__Acidimicrobiales	f__	g__	s__
seq414	35	44	111	10	52	77	0	0	0	5	9	5	k__Bacteria	p__Proteobacteria	c__Gammaproteobacteria	o__Xanthomonadales	f__Sinobacteraceae	g__	s__
seq415	58	100	50	38	35	30	0	29	0	8	0	0	k__Bacteria	p__Proteobacteria	c__Alphaproteobacteria	o__Sphingomonadales	f__Sphingomonadaceae
seq416	0	21	7	29	69	21	0	0	14	0	171	11	k__Bacteria	p__Bacteroidetes	c__Sphingobacteriia	o__Sphingobacteriales	f__Sphingobacteriaceae	g__	s__
seq417	0	0	0	44	47	93	0	0	0	0	45	114	k__Bacteria	p__Firmicutes	c__Bacilli	o__Bacillales	f__Bacillaceae	g__Bacillus	s__
seq418	0	13	0	0	0	0	0	0	0	329	0	0	k__Bacteria	p__Actinobacteria	c__Actinobacteria	o__Actinomycetales	f__Promicromonosporaceae	g__Cellulosimicrobium	s__
seq419	0	0	0	0	0	0	201	84	0	56	0	0	k__Bacteria	p__Proteobacteria	c__Gammaproteobacteria	o__Oceanospirillales	f__Oceanospirillaceae	g__	s__
seq420	35	22	23	31	21	181	0	0	0	0	27	0	k__Bacteria	p__Actinobacteria	c__Actinobacteria	o__Actinomycetales	f__Nocardioidaceae
seq421	0	67	0	18	0	0	36	45	33	52	57	32	k__Bacteria	p__Proteobacteria	c__Gammaproteobacteria	o__Enterobacteriales	f__Enterobacteriaceae	g__	s__
seq422	0	58	0	24	0	0	32	63	35	72	29	25	k__Bacteria	p__Proteobacteria	c__Gammaproteobacteria	o__Enterobacteriales	f__Enterobacteriaceae
seq423	0	23	0	0	24	28	0	0	0	8	30	224	k__Bacteria	p__Firmicutes	c__Bacilli	o__Bacillales	f__Bacillaceae
seq424	0	0	0	30	184	53	0	0	0	0	59	10	k__Bacteria	p__Firmicutes	c__Bacilli	o__Bacillales
seq425	0	0	0	49	222	64	0	0	0	0	0	0	k__Bacteria	p__Firmicutes	c__Bacilli	o__Bacillales	f__Planococcaceae	g__Planomicrobium	s__
seq426	91	87	36	30	57	21	0	0	0	0	0	12	k__Bacteria	p__Bacteroidetes	c__Cytophagia	o__Cytophagales	f__Cytophagaceae	g__Adhaeribacter	s__
seq427	65	123	34	24	49	14	0	0	0	11	14	0	k__Bacteria	p__Proteobacteria	c__Alphaproteobacteria	o__Rhodobacterales	f__Rhodobacteraceae	g__Rubellimicrobium	s__
seq428	0	40	0	0	0	0	0	0	26	0	155	112	k__Bacteria	p__Proteobacteria	c__Gammaproteobacteria	o__Enterobacteriales	f__Enterobacteriaceae
seq429	22	12	13	17	0	32	0	0	8	44	41	143	k__Bacteria	p__Actinobacteria	c__Actinobacteria	o__Actinomycetales	f__Nocardiopsaceae	g__	s__
seq430	0	18	0	50	32	52	0	0	0	0	71	109	k__Bacteria	p__Firmicutes	c__Bacilli	o__Bacillales	f__Bacillaceae	g__Bacillus
seq431	25	22	281	0	0	0	0	0	0	0	0	0	k__Bacteria	p__Actinobacteria	c__MB-A2-108	o__0319-7L14	f__	g__	s__
seq432	82	184	23	8	19	0	0	0	0	0	11	0	k__Bacteria	p__Bacteroidetes	c__[Saprospirae]	o__[Saprospirales]	f__Chitinophagaceae	g__	s__
seq433	0	13	0	0	0	0	0	30	0	279	0	5	k__Bacteria	p__Actinobacteria	c__Actinobacteria	o__Actinomycetales	f__	g__	s__
seq434	71	0	255	0	0	0	0	0	0	0	0	0	k__Bacteria	p__Actinobacteria	c__Acidimicrobiia	o__Acidimicrobiales	f__	g__	s__
seq435	43	183	17	17	42	11	0	0	0	0	6	6	k__Bacteria	p__Bacteroidetes	c__[Saprospirae]	o__[Saprospirales]	f__Chitinophagaceae	g__Flavisolibacter	s__
seq436	8	83	157	0	30	13	0	0	0	8	21	5	k__Bacteria	p__Firmicutes	c__Bacilli	o__Bacillales	f__Paenibacillaceae	g__Ammoniphilus	s__
seq437	0	0	0	37	0	0	0	0	172	0	102	14	k__Bacteria	p__Proteobacteria	c__Deltaproteobacteria	o__Syntrophobacterales	f__Syntrophobacteraceae	g__	s__
seq438	102	135	27	14	14	14	0	0	0	4	14	0	k__Bacteria	p__Proteobacteria	c__Alphaproteobacteria	o__Rhodobacterales	f__Rhodobacteraceae	g__Rubellimicrobium	s__
seq439	33	0	249	0	42	0	0	0	0	0	0	0	k__Bacteria	p__Bacteroidetes	c__Cytophagia	o__Cytophagales	f__Cytophagaceae	g__Adhaeribacter	s__
seq440	0	44	0	52	0	0	85	100	43	0	0	0	k__Bacteria	p__Proteobacteria	c__Betaproteobacteria	o__Rhodocyclales	f__Rhodocyclaceae	g__Dechloromonas	s__
seq441	23	29	0	42	94	49	0	0	0	12	59	14	k__Bacteria	p__Proteobacteria	c__Alphaproteobacteria	o__Rhizobiales	f__Hyphomicrobiaceae	g__Devosia	s__
seq442	127	0	180	2	0	12	0	0	0	0	0	0	k__Bacteria	p__Actinobacteria	c__MB-A2-108	o__0319-7L14	f__	g__	s__
seq443	319	0	0	0	0	0	0	0	0	0	0	0	k__Bacteria	p__Actinobacteria	c__Rubrobacteria	o__Rubrobacterales	f__Rubrobacteraceae	g__Rubrobacter	s__
seq444	25	71	30	48	145	0	0	0	0	0	0	0	k__Bacteria	p__Bacteroidetes	c__Cytophagia	o__Cytophagales	f__Cytophagaceae	g__Dyadobacter	s__
seq445	19	0	14	11	49	181	0	0	0	8	20	17	k__Bacteria	p__Proteobacteria	c__Alphaproteobacteria	o__Sphingomonadales	f__Sphingomonadaceae
seq446	0	0	0	10	31	261	0	0	0	0	0	17	k__Bacteria	p__Firmicutes	c__Bacilli	o__Bacillales	f__Bacillaceae	g__Bacillus	s__
seq447	231	29	25	14	0	19	0	0	0	0	0	0	k__Bacteria	p__Actinobacteria	c__Thermoleophilia	o__Gaiellales	f__Gaiellaceae	g__	s__
seq448	155	0	149	0	0	14	0	0	0	0	0	0	k__Bacteria	p__Actinobacteria	c__Acidimicrobiia	o__Acidimicrobiales
seq449	0	16	0	48	0	0	101	87	41	12	8	4	k__Bacteria	p__Firmicutes	c__Clostridia	o__Clostridiales	f__Ruminococcaceae	g__Ruminococcus	s__
seq450	40	41	179	11	21	20	0	0	0	0	0	0	k__Bacteria	p__Proteobacteria	c__Betaproteobacteria	o__Burkholderiales	f__Comamonadaceae
seq451	198	0	87	0	0	26	0	0	0	0	0	0	k__Bacteria	p__Actinobacteria	c__Actinobacteria	o__Actinomycetales	f__Sporichthyaceae	g__	s__
seq452	0	9	0	0	0	0	0	33	0	230	0	39	k__Bacteria	p__Actinobacteria	c__Actinobacteria	o__Actinomycetales	f__Nocardioidaceae	g__	s__
seq453	0	0	311	0	0	0	0	0	0	0	0	0	k__Bacteria	p__Proteobacteria	c__Betaproteobacteria	o__Burkholderiales	f__Comamonadaceae
seq454	41	46	21	23	28	33	0	27	0	20	43	27	k__Bacteria	p__Proteobacteria	c__Betaproteobacteria	o__Burkholderiales	f__Comamonadaceae
seq455	0	0	0	0	0	93	0	0	0	0	72	144	k__Bacteria	p__Proteobacteria	c__Gammaproteobacteria	o__Pseudomonadales	f__Pseudomonadaceae
seq456	0	9	0	0	0	0	0	39	0	253	0	6	k__Bacteria	p__Chloroflexi	c__Thermomicrobia	o__AKYG1722	f__	g__	s__
seq457	28	0	0	0	248	28	0	0	0	0	0	0	k__Bacteria	p__Firmicutes	c__Bacilli	o__Lactobacillales	f__Lactobacillaceae	g__Lactobacillus
seq458	0	0	0	46	33	0	83	100	42	0	0	0	k__Bacteria	p__Proteobacteria	c__Gammaproteobacteria	o__Xanthomonadales	f__Sinobacteraceae	g__	s__
seq459	144	0	139	0	0	20	0	0	0	0	0	0	k__Bacteria	p__Actinobacteria	c__Acidimicrobiia	o__Acidimicrobiales	f__	g__	s__
seq460	46	26	0	15	14	32	0	0	0	79	55	36	k__Bacteria	p__Actinobacteria	c__Actinobacteria	o__Actinomycetales	f__Nocardioidaceae
seq461	61	132	110	0	0	0	0	0	0	0	0	0	k__Bacteria	p__Proteobacteria	c__Betaproteobacteria	o__Burkholderiales	f__Oxalobacteraceae	g__	s__
seq462	0	0	303	0	0	0	0	0	0	0	0	0	k__Bacteria	p__Proteobacteria	c__Betaproteobacteria	o__Burkholderiales
seq463	0	0	33	55	0	74	0	0	0	12	67	61	k__Bacteria	p__Proteobacteria	c__Betaproteobacteria	o__Burkholderiales	f__Oxalobacteraceae	g__	s__
seq464	16	58	160	15	0	22	0	0	0	0	20	8	k__Bacteria	p__Proteobacteria	c__Betaproteobacteria	o__Burkholderiales	f__	g__	s__
seq465	26	102	29	70	47	25	0	0	0	0	0	0	k__Bacteria	p__Proteobacteria	c__Betaproteobacteria	o__Burkholderiales	f__Oxalobacteraceae
seq466	89	97	58	9	21	17	0	0	0	0	5	0	k__Bacteria	p__Proteobacteria	c__Alphaproteobacteria	o__Rhodospirillales	f__Acetobacteraceae
seq467	0	16	0	13	0	0	21	99	17	93	23	14	k__Bacteria	p__Proteobacteria	c__Gammaproteobacteria	o__Vibrionales	f__Pseudoalteromonadaceae	g__Pseudoalteromonas	s__
seq468	0	0	0	0	0	0	4	193	0	99	0	0	k__Bacteria	p__Proteobacteria	c__Gammaproteobacteria	o__Alteromonadales	f__Alteromonadaceae	g__Glaciecola	s__
seq469	169	69	22	0	0	35	0	0	0	0	0	0	k__Bacteria	p__Proteobacteria	c__Alphaproteobacteria	o__Rhizobiales	f__Bradyrhizobiaceae	g__Balneimonas	s__
seq470	0	41	242	0	0	0	0	0	0	12	0	0	k__Bacteria	p__Bacteroidetes	c__[Saprospirae]	o__[Saprospirales]	f__Chitinophagaceae	g__Flavisolibacter	s__
seq471	0	11	0	0	0	0	0	47	26	61	109	41	k__Bacteria	p__Actinobacteria	c__Actinobacteria	o__Actinomycetales
seq472	0	0	0	23	188	35	0	0	0	0	31	18	k__Bacteria	p__Bacteroidetes	c__Sphingobacteriia	o__Sphingobacteriales	f__Sphingobacteriaceae	g__	s__
seq473	0	0	0	0	0	46	5	0	0	0	27	217	k__Bacteria	p__Firmicutes	c__Bacilli	o__Bacillales	f__Paenibacillaceae	g__Paenibacillus
seq474	236	0	36	0	0	22	0	0	0	0	0	0	k__Bacteria	p__Actinobacteria	c__Acidimicrobiia	o__Acidimicrobiales	f__	g__	s__
seq475	80	104	30	43	0	36	0	0	0	0	0	0	k__Bacteria	p__Actinobacteria	c__Actinobacteria	o__Actinomycetales	f__Geodermatophilaceae
seq476	0	41	103	21	62	42	0	0	0	0	24	0	k__Bacteria	p__Firmicutes	c__Bacilli	o__Bacillales	f__Bacillaceae	g__Bacillus	s__
seq477	46	0	0	0	0	72	0	0	0	0	60	114	k__Bacteria	p__Actinobacteria	c__Actinobacteria	o__Actinomycetales	f__Streptomycetaceae	g__Streptomyces	s__
seq478	0	292	0	0	0	0	0	0	0	0	0	0	k__Bacteria	p__Bacteroidetes	c__Flavobacteriia	o__Flavobacteriales	f__Flavobacteriaceae	g__Flavobacterium
seq479	12	50	65	0	65	34	0	0	17	0	26	20	k__Bacteria	p__Proteobacteria	c__Betaproteobacteria	o__Burkholderiales	f__Oxalobacteraceae	g__	s__
seq480	0	0	0	42	0	0	92	86	69	0	0	0	k__Bacteria	p__Proteobacteria	c__Epsilonproteobacteria	o__Campylobacterales	f__Helicobacteraceae	g__	s__
seq481	42	54	47	30	29	19	0	0	0	10	37	20	k__Bacteria	p__Actinobacteria	c__Actinobacteria	o__Actinomycetales	f__Streptosporangiaceae
seq482	0	8	0	16	107	118	0	0	0	0	26	13	k__Bacteria	p__Firmicutes	c__Bacilli	o__Bacillales
seq483	0	0	0	0	104	61	0	0	0	0	0	123	k__Bacteria	p__Firmicutes	c__Bacilli	o__Bacillales	f__Bacillaceae	g__Bacillus	s__
seq484	177	18	82	0	0	10	0	0	0	0	0	0	k__Bacteria	p__Actinobacteria	c__Acidimicrobiia	o__Acidimicrobiales	f__	g__	s__
seq485	62	0	55	0	121	49	0	0	0	0	0	0	k__Bacteria	p__Firmicutes	c__Bacilli	o__Lactobacillales	f__Lactobacillaceae	g__Lactobacillus	s__zeae
seq486	42	21	205	0	0	19	0	0	0	0	0	0	k__Bacteria	p__Actinobacteria	c__Thermoleophilia	o__Gaiellales	f__Gaiellaceae	g__	s__
seq487	0	0	0	0	0	0	102	74	0	111	0	0	k__Bacteria	p__Firmicutes	c__Bacilli	o__Bacillales
seq488	0	0	58	54	72	47	0	0	0	0	55	0	k__Bacteria	p__Firmicutes	c__Bacilli	o__Bacillales	f__Bacillaceae
seq489	38	85	130	0	0	32	0	0	0	0	0	0	k__Bacteria	p__Proteobacteria	c__Betaproteobacteria	o__Burkholderiales	f__Oxalobacteraceae
seq490	6	19	0	63	15	37	0	0	0	46	0	99	k__Bacteria	p__Firmicutes	c__Bacilli	o__Bacillales	f__Paenibacillaceae	g__Saccharibacillus	s__kuerlensis
seq491	0	11	0	6	0	0	0	14	0	189	55	10	k__Bacteria	p__Bacteroidetes	c__[Saprospirae]	o__[Saprospirales]	f__Chitinophagaceae	g__Chitinophaga	s__
seq492	0	0	0	0	123	162	0	0	0	0	0	0	k__Bacteria	p__Firmicutes	c__Bacilli	o__Bacillales	f__Bacillaceae	g__Bacillus	s__badius
seq493	0	0	0	0	0	0	0	35	0	227	9	14	k__Bacteria	p__Actinobacteria	c__Actinobacteria	o__Actinomycetales	f__Mycobacteriaceae	g__Mycobacterium	s__
seq494	121	36	0	0	75	0	0	0	0	18	34	0	k__Bacteria	p__Actinobacteria	c__Actinobacteria	o__Actinomycetales	f__Micromonosporaceae	g__Actinoplanes	s__
seq495	88	120	0	0	45	0	0	0	0	0	30	0	k__Bacteria	p__Actinobacteria	c__Actinobacteria	o__Actinomycetales	f__Nocardioidaceae	g__	s__
seq496	0	0	0	0	0	165	0	0	0	0	0	118	k__Bacteria	p__Firmicutes	c__Bacilli	o__Bacillales	f__Planococcaceae
seq497	0	0	0	0	0	0	0	40	0	243	0	0	k__Bacteria	p__Actinobacteria	c__Actinobacteria	o__Actinomycetales	f__Microbacteriaceae	g__Microbacterium	s__
seq498	0	12	0	0	0	0	0	0	0	248	22	0	k__Bacteria	p__Bacteroidetes	c__Sphingobacteriia	o__Sphingobacteriales	f__Sphingobacteriaceae	g__Parapedobacter	s__
seq499	67	104	24	22	23	7	0	0	0	14	9	11	k__Bacteria	p__Proteobacteria	c__Alphaproteobacteria	o__Rhodobacterales	f__Rhodobacteraceae	g__Rubellimicrobium	s__
seq500	0	46	0	22	54	53	0	0	0	20	31	55	k__Bacteria	p__Actinobacteria	c__Actinobacteria	o__Actinomycetales	f__Micrococcaceae	g__	s__
seq501	0	0	0	25	0	0	0	0	92	0	128	36	k__Bacteria	p__Proteobacteria	c__Gammaproteobacteria	o__Enterobacteriales	f__Enterobacteriaceae	g__Klebsiella	s__
seq502	0	0	0	31	0	12	0	0	0	21	47	169	k__Bacteria	p__Proteobacteria	c__Gammaproteobacteria	o__Enterobacteriales	f__Enterobacteriaceae
seq503	17	0	255	0	0	7	0	0	0	0	0	0	k__Bacteria	p__Bacteroidetes	c__[Saprospirae]	o__[Saprospirales]	f__Chitinophagaceae
seq504	0	0	279	0	0	0	0	0	0	0	0	0	k__Bacteria	p__Firmicutes	c__Bacilli	o__Bacillales	f__Paenibacillaceae	g__Ammoniphilus	s__
seq505	26	36	11	68	47	34	0	0	0	0	13	43	k__Bacteria	p__Bacteroidetes	c__Cytophagia	o__Cytophagales	f__Cytophagaceae	g__Pontibacter	s__
seq506	0	34	0	37	0	0	42	55	38	15	32	25	k__Bacteria	p__Proteobacteria	c__Gammaproteobacteria	o__Pseudomonadales	f__Pseudomonadaceae	g__Pseudomonas	s__viridiflava
seq507	100	119	57	0	0	0	0	0	0	0	0	0	k__Bacteria	p__Actinobacteria	c__Actinobacteria	o__Actinomycetales
seq508	0	7	0	0	0	0	0	16	0	243	5	5	k__Bacteria	p__Actinobacteria	c__Actinobacteria	o__Actinomycetales
seq509	0	0	0	0	0	0	0	0	0	0	0	276	k__Bacteria	p__Firmicutes	c__Bacilli	o__Bacillales	f__Bacillaceae	g__Bacillus
seq510	0	0	0	90	128	56	0	0	0	0	0	0	k__Bacteria	p__Firmicutes	c__Bacilli	o__Bacillales	f__Planococcaceae	g__Planomicrobium	s__
seq511	19	0	240	6	0	8	0	0	0	0	0	0	k__Bacteria	p__Bacteroidetes	c__[Saprospirae]	o__[Saprospirales]	f__Chitinophagaceae	g__Flavisolibacter	s__
seq512	0	0	273	0	0	0	0	0	0	0	0	0	k__Bacteria	p__Gemmatimonadetes	c__Gemm-3	o__	f__	g__	s__
seq513	0	0	0	10	20	94	0	0	0	11	104	33	k__Bacteria	p__Firmicutes	c__Bacilli	o__Bacillales
seq514	0	0	0	0	140	0	0	0	0	0	85	47	k__Bacteria	p__Firmicutes	c__Bacilli	o__Bacillales
seq515	20	28	12	29	40	45	0	0	6	0	38	53	k__Bacteria	p__Proteobacteria	c__Gammaproteobacteria	o__Xanthomonadales	f__Xanthomonadaceae	g__Lysobacter	s__
seq516	0	54	27	116	60	14	0	0	0	0	0	0	k__Bacteria	p__Proteobacteria	c__Betaproteobacteria	o__Burkholderiales	f__Oxalobacteraceae	g__Janthinobacterium	s__
seq517	0	87	0	125	59	0	0	0	0	0	0	0	k__Bacteria	p__Proteobacteria	c__Betaproteobacteria	o__Burkholderiales	f__Oxalobacteraceae
seq518	78	151	21	5	6	0	0	0	0	3	0	5	k__Bacteria	p__Verrucomicrobia	c__[Pedosphaerae]	o__[Pedosphaerales]	f__	g__	s__
seq519	0	90	0	0	0	0	179	0	0	0	0	0	k__Bacteria	p__Proteobacteria	c__Alphaproteobacteria	o__Rhodobacterales	f__Rhodobacteraceae	g__Anaerospora	s__
seq520	48	0	212	0	0	7	0	0	0	0	0	0	k__Bacteria	p__Actinobacteria	c__Rubrobacteria	o__Rubrobacterales	f__Rubrobacteraceae	g__Rubrobacter	s__
seq521	54	123	22	24	43	0	0	0	0	0	0	0	k__Bacteria	p__Bacteroidetes	c__Cytophagia	o__Cytophagales	f__Cytophagaceae	g__Adhaeribacter	s__
seq522	39	128	0	26	45	11	0	0	0	0	17	0	k__Bacteria	p__Actinobacteria	c__Actinobacteria	o__Actinomycetales	f__Kineosporiaceae	g__	s__
seq523	47	0	194	0	0	25	0	0	0	0	0	0	k__Bacteria	p__Proteobacteria	c__Betaproteobacteria	o__Burkholderiales	f__Oxalobacteraceae
seq524	86	0	0	0	48	69	0	0	0	26	0	36	k__Bacteria	p__Proteobacteria	c__Alphaproteobacteria	o__Sphingomonadales	f__Sphingomonadaceae
seq525	40	0	0	33	32	101	0	0	0	0	59	0	k__Bacteria	p__Firmicutes	c__Bacilli	o__Bacillales	f__Paenibacillaceae	g__	s__
seq526	0	0	0	39	174	52	0	0	0	0	0	0	k__Bacteria	p__Firmicutes	c__Bacilli	o__Bacillales	f__Planococcaceae	g__Planomicrobium	s__
seq527	0	0	0	0	0	0	26	61	35	97	46	0	k__Bacteria	p__Actinobacteria	c__Actinobacteria	o__Actinomycetales	f__Streptosporangiaceae	g__Nonomuraea	s__
seq528	58	118	53	21	14	0	0	0	0	0	0	0	k__Bacteria	p__Proteobacteria	c__Betaproteobacteria	o__Burkholderiales	f__Oxalobacteraceae	g__	s__
seq529	35	0	221	0	0	8	0	0	0	0	0	0	k__Bacteria	p__Actinobacteria	c__Acidimicrobiia	o__Acidimicrobiales	f__	g__	s__
seq530	23	40	14	47	133	0	0	0	0	0	5	0	k__Bacteria	p__Bacteroidetes	c__[Saprospirae]	o__[Saprospirales]	f__Chitinophagaceae	g__Segetibacter	s__
seq531	22	0	223	0	0	17	0	0	0	0	0	0	k__Bacteria	p__Actinobacteria	c__MB-A2-108	o__0319-7L14	f__	g__	s__
seq532	94	24	15	6	49	30	24	0	0	0	19	0	k__Bacteria	p__Actinobacteria	c__Actinobacteria	o__Actinomycetales	f__Actinosynnemataceae	g__	s__
seq533	88	0	173	0	0	0	0	0	0	0	0	0	k__Bacteria	p__Firmicutes	c__Bacilli	o__Bacillales	f__Paenibacillaceae	g__Ammoniphilus	s__
seq534	212	0	35	0	0	13	0	0	0	0	0	0	k__Bacteria	p__Proteobacteria	c__Alphaproteobacteria	o__Rhizobiales	f__Bradyrhizobiaceae	g__	s__
seq535	80	104	76	0	0	0	0	0	0	0	0	0	k__Bacteria	p__Proteobacteria	c__Betaproteobacteria	o__Burkholderiales	f__Oxalobacteraceae
seq536	76	164	20	0	0	0	0	0	0	0	0	0	k__Archaea	p__Euryarchaeota	c__Thermoplasmata	o__E2	f__	g__	s__
seq537	0	133	117	0	0	0	0	0	0	0	10	0	k__Bacteria	p__Gemmatimonadetes	c__Gemm-3	o__	f__	g__	s__
seq538	59	83	91	0	0	16	0	0	0	0	0	10	k__Bacteria	p__Gemmatimonadetes	c__Gemm-3	o__	f__	g__	s__
seq539	0	0	0	50	13	0	64	81	51	0	0	0	k__Bacteria	p__Proteobacteria	c__Alphaproteobacteria	o__Rhizobiales	f__	g__	s__
seq540	0	0	0	0	0	0	51	65	58	43	32	10	k__Bacteria	p__Cyanobacteria	c__Chloroplast	o__Streptophyta	f__	g__	s__
seq541	0	0	0	0	0	0	0	0	130	0	129	0	k__Bacteria	p__Bacteroidetes	c__[Rhodothermi]	o__[Rhodothermales]	f__[Balneolaceae]	g__Balneola	s__
seq542	31	82	21	83	41	0	0	0	0	0	0	0	k__Bacteria	p__Proteobacteria	c__Betaproteobacteria	o__Burkholderiales	f__Oxalobacteraceae
seq543	0	0	0	257	0	0	0	0	0	0	0	0	k__Bacteria	p__Firmicutes	c__Bacilli	o__Bacillales	f__Planococcaceae	g__Planomicrobium	s__
seq544	55	101	37	0	63	0	0	0	0	0	0	0	k__Bacteria	p__Actinobacteria	c__Actinobacteria	o__Actinomycetales	f__Cellulomonadaceae	g__Cellulomonas	s__
seq545	0	61	0	81	36	56	0	0	0	0	0	21	k__Bacteria	p__Proteobacteria	c__Betaproteobacteria	o__Burkholderiales	f__Oxalobacteraceae	g__	s__
seq546	0	0	0	0	0	27	0	0	0	0	0	228	k__Bacteria	p__Firmicutes	c__Bacilli	o__Bacillales	f__Bacillaceae	g__Bacillus	s__
seq547	0	106	0	0	148	0	0	0	0	0	0	0	k__Bacteria	p__Bacteroidetes	c__Cytophagia	o__Cytophagales	f__Cytophagaceae	g__Dyadobacter	s__
seq548	0	17	0	0	0	0	0	10	0	227	0	0	k__Bacteria	p__Actinobacteria	c__Actinobacteria	o__Actinomycetales	f__Mycobacteriaceae	g__Mycobacterium	s__
seq549	0	0	0	0	39	180	0	0	0	9	0	26	k__Bacteria	p__Proteobacteria	c__Alphaproteobacteria	o__Sphingomonadales	f__Sphingomonadaceae
seq550	111	31	0	25	86	0	0	0	0	0	0	0	k__Bacteria	p__Actinobacteria	c__Actinobacteria	o__Actinomycetales	f__Micromonosporaceae	g__	s__
seq551	43	107	63	0	0	0	0	0	0	0	40	0	k__Bacteria	p__Proteobacteria	c__Betaproteobacteria	o__Burkholderiales	f__Oxalobacteraceae	g__	s__
seq552	0	0	0	0	0	0	0	32	31	90	51	49	k__Bacteria	p__Actinobacteria	c__Actinobacteria	o__Actinomycetales	f__Thermomonosporaceae	g__Actinomadura	s__vinacea
seq553	0	64	0	115	44	28	0	0	0	0	0	0	k__Bacteria	p__Proteobacteria	c__Betaproteobacteria	o__Burkholderiales	f__Oxalobacteraceae	g__Janthinobacterium	s__
seq554	0	13	0	0	0	0	0	22	0	199	11	6	k__Bacteria	p__Actinobacteria	c__Actinobacteria	o__Actinomycetales
seq555	67	89	39	12	21	15	0	0	0	0	0	7	k__Bacteria	p__Proteobacteria	c__Alphaproteobacteria	o__Rhodospirillales	f__Rhodospirillaceae	g__Skermanella	s__
seq556	37	53	30	37	41	17	0	0	0	0	20	15	k__Bacteria	p__Proteobacteria	c__Alphaproteobacteria	o__Rhizobiales	f__Bradyrhizobiaceae	g__Balneimonas	s__
seq557	170	0	31	0	18	0	0	0	0	0	31	0	k__Bacteria	p__Actinobacteria	c__Actinobacteria	o__Actinomycetales	f__Actinosynnemataceae	g__Saccharothrix	s__
seq558	87	116	0	0	46	0	0	0	0	0	0	0	k__Bacteria	p__Gemmatimonadetes	c__Gemm-3	o__	f__	g__	s__
seq559	61	45	142	0	0	0	0	0	0	0	0	0	k__Bacteria	p__Actinobacteria	c__Actinobacteria	o__Actinomycetales	f__Nocardioidaceae	g__	s__
seq560	26	0	0	0	40	15	71	62	0	34	0	0	k__Bacteria	p__Nitrospirae	c__Nitrospira	o__Nitrospirales	f__Nitrospiraceae	g__Nitrospira	s__
seq561	22	0	209	0	0	17	0	0	0	0	0	0	k__Bacteria	p__Actinobacteria	c__MB-A2-108	o__0319-7L14	f__	g__	s__
seq562	0	44	0	23	0	0	56	83	42	0	0	0	k__Bacteria	p__Actinobacteria	c__Actinobacteria	o__Actinomycetales	f__Microbacteriaceae	g__Microbacterium	s__
seq563	0	42	92	0	0	32	0	0	0	0	54	28	k__Bacteria	p__Firmicutes	c__Bacilli	o__Bacillales	f__Paenibacillaceae	g__Ammoniphilus	s__
seq564	195	16	25	0	0	11	0	0	0	0	0	0	k__Bacteria	p__Gemmatimonadetes	c__Gemm-3	o__	f__	g__	s__
seq565	95	60	0	32	20	33	0	0	0	0	0	7	k__Bacteria	p__Chloroflexi	c__Chloroflexi	o__Herpetosiphonales	f__	g__	s__
seq566	0	0	0	247	0	0	0	0	0	0	0	0	k__Bacteria	p__Firmicutes	c__Bacilli	o__Bacillales	f__Bacillaceae	g__Bacillus
seq567	0	0	0	0	106	0	0	0	18	51	72	0	k__Bacteria	p__Actinobacteria	c__Actinobacteria	o__Actinomycetales	f__Micromonosporaceae	g__	s__
seq568	98	41	0	25	54	28	0	0	0	0	0	0	k__Bacteria	p__Proteobacteria	c__Alphaproteobacteria	o__Sphingomonadales	f__Sphingomonadaceae
seq569	0	0	246	0	0	0	0	0	0	0	0	0	k__Bacteria	p__Proteobacteria	c__Betaproteobacteria	o__Burkholderiales	f__Comamonadaceae
seq570	54	8	159	0	0	24	0	0	0	0	0	0	k__Bacteria	p__Proteobacteria	c__Alphaproteobacteria	o__Rhizobiales	f__Hyphomicrobiaceae
seq571	0	0	0	8	24	29	0	47	10	0	59	68	k__Bacteria	p__Actinobacteria	c__Actinobacteria	o__Actinomycetales	f__Promicromonosporaceae
seq572	209	15	20	0	0	0	0	0	0	0	0	0	k__Bacteria	p__Actinobacteria	c__Rubrobacteria	o__Rubrobacterales	f__Rubrobacteraceae	g__Rubrobacter	s__
seq573	65	7	164	0	0	8	0	0	0	0	0	0	k__Bacteria	p__Actinobacteria	c__MB-A2-108	o__	f__	g__	s__
seq574	38	29	141	0	0	27	0	0	0	9	0	0	k__Bacteria	p__Actinobacteria	c__MB-A2-108	o__0319-7L14	f__	g__	s__
seq575	18	37	0	24	0	74	0	0	11	10	45	25	k__Bacteria	p__Proteobacteria	c__Alphaproteobacteria	o__Rhodospirillales	f__Acetobacteraceae
seq576	192	0	29	0	0	6	0	10	0	0	6	0	k__Bacteria	p__Actinobacteria	c__Actinobacteria	o__Actinomycetales	f__Thermomonosporaceae	g__	s__
seq577	0	17	20	31	34	93	0	0	0	0	0	48	k__Bacteria	p__Bacteroidetes	c__Cytophagia	o__Cytophagales	f__Cytophagaceae
seq578	0	0	0	27	0	0	0	0	86	0	96	33	k__Bacteria	p__Actinobacteria	c__Actinobacteria	o__Actinomycetales	f__Mycobacteriaceae	g__Mycobacterium	s__
seq579	0	82	60	0	0	38	0	0	0	0	30	31	k__Bacteria	p__Actinobacteria	c__Actinobacteria	o__Actinomycetales	f__Geodermatophilaceae	g__	s__
seq580	0	0	0	0	0	0	0	157	0	84	0	0	k__Bacteria	p__Proteobacteria	c__Gammaproteobacteria	o__Vibrionales	f__Pseudoalteromonadaceae	g__Pseudoalteromonas
seq581	70	58	80	16	0	16	0	0	0	0	0	0	k__Bacteria	p__Gemmatimonadetes	c__Gemm-3	o__	f__	g__	s__
seq582	13	0	14	9	15	86	0	0	0	0	69	34	k__Bacteria	p__Proteobacteria	c__Betaproteobacteria	o__Burkholderiales	f__Comamonadaceae
seq583	18	14	207	0	0	0	0	0	0	0	0	0	k__Bacteria	p__Verrucomicrobia	c__[Pedosphaerae]	o__[Pedosphaerales]	f__	g__	s__
seq584	12	54	24	58	91	0	0	0	0	0	0	0	k__Bacteria	p__Proteobacteria	c__Alphaproteobacteria	o__Rhodobacterales	f__Rhodobacteraceae	g__Paracoccus
seq585	84	92	53	0	0	0	0	0	0	10	0	0	k__Bacteria	p__Chloroflexi	c__Chloroflexi	o__AKIW781	f__	g__	s__
seq586	0	0	0	14	0	0	0	0	150	0	74	0	k__Bacteria	p__Proteobacteria	c__Deltaproteobacteria	o__PB19	f__	g__	s__
seq587	0	0	0	0	0	0	238	0	0	0	0	0	k__Bacteria	p__Proteobacteria	c__Gammaproteobacteria	o__Oceanospirillales	f__	g__	s__
seq588	96	83	28	11	5	14	0	0	0	0	0	0	k__Bacteria	p__Actinobacteria	c__Actinobacteria	o__Actinomycetales	f__Geodermatophilaceae
seq589	64	110	49	0	0	0	0	2	0	5	7	0	k__Bacteria	p__Chloroflexi	c__Chloroflexi	o__AKIW781	f__	g__	s__
seq590	34	0	194	0	0	9	0	0	0	0	0	0	k__Bacteria	p__Chloroflexi	c__Chloroflexi	o__[Roseiflexales]
seq591	42	0	32	16	52	0	0	0	0	18	61	16	k__Bacteria	p__Firmicutes	c__Bacilli	o__Bacillales	f__Paenibacillaceae	g__	s__
seq592	0	52	0	16	0	0	26	38	14	31	38	21	k__Bacteria	p__Proteobacteria	c__Betaproteobacteria	o__Burkholderiales	f__Comamonadaceae	g__Comamonas	s__
seq593	75	89	43	20	7	0	0	0	0	0	0	0	k__Bacteria	p__Proteobacteria	c__Alphaproteobacteria	o__Rhodobacterales	f__Rhodobacteraceae	g__Rubellimicrobium	s__
seq594	13	0	214	0	0	7	0	0	0	0	0	0	k__Bacteria	p__Gemmatimonadetes	c__Gemm-3	o__	f__	g__	s__
seq595	0	56	29	36	44	40	0	0	0	0	0	29	k__Bacteria	p__Proteobacteria	c__Alphaproteobacteria	o__Rhodospirillales	f__Rhodospirillaceae	g__Azospirillum	s__
seq596	0	0	0	0	0	63	0	0	0	75	96	0	k__Bacteria	p__Proteobacteria	c__Alphaproteobacteria	o__Rhizobiales	f__Phyllobacteriaceae
seq597	0	0	0	0	0	69	0	17	0	0	111	37	k__Bacteria	p__Proteobacteria	c__Alphaproteobacteria	o__Sphingomonadales	f__Sphingomonadaceae	g__	s__
seq598	47	0	175	0	0	11	0	0	0	0	0	0	k__Bacteria	p__Actinobacteria	c__Thermoleophilia	o__Solirubrobacterales	f__Conexibacteraceae	g__	s__
seq599	121	21	90	0	0	0	0	0	0	0	0	0	k__Bacteria	p__Gemmatimonadetes	c__Gemm-3	o__	f__	g__	s__
seq600	0	40	20	43	49	29	8	0	0	0	23	20	k__Bacteria	p__Proteobacteria	c__Alphaproteobacteria	o__Rhodospirillales	f__Acetobacteraceae
seq601	183	0	28	0	0	20	0	0	0	0	0	0	k__Bacteria	p__Proteobacteria	c__Gammaproteobacteria	o__Chromatiales
seq602	39	73	17	20	81	0	0	0	0	0	0	0	k__Bacteria	p__Proteobacteria	c__Alphaproteobacteria	o__Rhodobacterales	f__Rhodobacteraceae	g__Rubellimicrobium	s__
seq603	0	0	0	96	134	0	0	0	0	0	0	0	k__Bacteria	p__Bacteroidetes	c__Cytophagia	o__Cytophagales	f__Cytophagaceae
seq604	0	0	0	0	0	0	0	0	0	0	0	230	k__Bacteria	p__Proteobacteria	c__Gammaproteobacteria	o__Pseudomonadales	f__Pseudomonadaceae
seq605	202	0	15	0	0	12	0	0	0	0	0	0	k__Bacteria	p__Actinobacteria	c__MB-A2-108	o__0319-7L14	f__	g__	s__
seq606	64	0	68	0	0	97	0	0	0	0	0	0	k__Bacteria	p__Firmicutes	c__Bacilli	o__Lactobacillales	f__Lactobacillaceae	g__Lactobacillus
seq607	0	20	0	21	11	0	72	72	33	0	0	0	k__Bacteria	p__Proteobacteria	c__Deltaproteobacteria	o__Desulfobacterales	f__Desulfobacteraceae	g__Desulfococcus	s__
seq608	50	116	41	16	0	0	0	0	0	0	5	0	k__Bacteria	p__Proteobacteria	c__Betaproteobacteria	o__Burkholderiales	f__	g__	s__
seq609	192	0	25	0	0	10	0	0	0	0	0	0	k__Bacteria	p__Acidobacteria	c__Solibacteres	o__Solibacterales
seq610	108	59	18	10	12	14	0	0	0	0	6	0	k__Bacteria	p__Proteobacteria	c__Alphaproteobacteria	o__Rhodospirillales	f__Acetobacteraceae	g__	s__
seq611	73	154	0	0	0	0	0	0	0	0	0	0	k__Bacteria	p__Proteobacteria	c__Alphaproteobacteria	o__Rhizobiales	f__Bradyrhizobiaceae	g__Balneimonas	s__
seq612	87	140	0	0	0	0	0	0	0	0	0	0	k__Bacteria	p__Gemmatimonadetes	c__Gemm-3	o__	f__	g__	s__
seq613	21	24	182	0	0	0	0	0	0	0	0	0	k__Bacteria	p__Actinobacteria	c__Acidimicrobiia	o__Acidimicrobiales	f__	g__	s__
seq614	0	72	0	0	0	0	10	10	0	60	44	31	k__Bacteria	p__Proteobacteria	c__Gammaproteobacteria	o__Enterobacteriales	f__Enterobacteriaceae
seq615	0	0	0	0	33	0	0	0	0	29	87	78	k__Bacteria	p__Firmicutes	c__Bacilli	o__Bacillales	f__Bacillaceae	g__Bacillus	s__firmus
seq616	57	75	27	0	0	0	0	0	0	66	0	0	k__Bacteria	p__Actinobacteria	c__Actinobacteria	o__Actinomycetales	f__Geodermatophilaceae
seq617	45	19	0	0	0	0	0	25	0	21	87	27	k__Bacteria	p__Actinobacteria	c__Actinobacteria	o__Actinomycetales	f__Streptosporangiaceae	g__Nonomuraea	s__
seq618	0	0	224	0	0	0	0	0	0	0	0	0	k__Bacteria	p__Proteobacteria	c__Betaproteobacteria	o__Burkholderiales	f__Comamonadaceae
seq619	66	70	19	11	35	7	5	0	0	10	0	0	k__Bacteria	p__Proteobacteria	c__Alphaproteobacteria	o__Rhodospirillales	f__Acetobacteraceae	g__	s__
seq620	0	155	0	0	35	0	0	0	0	0	33	0	k__Bacteria	p__Proteobacteria	c__Betaproteobacteria	o__Burkholderiales	f__Oxalobacteraceae	g__	s__
seq621	0	0	0	21	0	39	0	65	0	0	61	37	k__Bacteria	p__Actinobacteria	c__Actinobacteria	o__Actinomycetales	f__Streptosporangiaceae	g__Nonomuraea	s__
seq622	0	0	0	0	0	0	0	80	75	0	36	32	k__Bacteria	p__Actinobacteria	c__Actinobacteria	o__Actinomycetales	f__Thermomonosporaceae	g__Actinomadura
seq623	40	132	18	15	17	0	0	0	0	0	0	0	k__Bacteria	p__Bacteroidetes	c__[Saprospirae]	o__[Saprospirales]	f__Chitinophagaceae
seq624	70	63	0	0	0	38	0	0	0	0	50	0	k__Bacteria	p__Actinobacteria	c__Actinobacteria	o__Actinomycetales	f__Geodermatophilaceae
seq625	65	4	12	16	84	19	0	0	0	0	15	5	k__Bacteria	p__Proteobacteria	c__Alphaproteobacteria	o__Caulobacterales	f__Caulobacteraceae	g__	s__
seq626	110	77	33	0	0	0	0	0	0	0	0	0	k__Bacteria	p__Proteobacteria	c__Alphaproteobacteria	o__Rhizobiales	f__Bradyrhizobiaceae	g__Balneimonas	s__
seq627	54	0	166	0	0	0	0	0	0	0	0	0	k__Bacteria	p__Actinobacteria	c__MB-A2-108	o__0319-7L14	f__	g__	s__
seq628	0	0	0	0	0	0	0	0	106	0	114	0	k__Bacteria	p__Firmicutes	c__Bacilli	o__Lactobacillales	f__Enterococcaceae	g__Enterococcus	s__
seq629	0	0	0	26	0	36	0	0	0	0	51	106	k__Bacteria	p__Proteobacteria	c__Betaproteobacteria	o__Burkholderiales
seq630	0	0	0	0	0	26	0	0	0	0	0	193	k__Bacteria	p__Firmicutes	c__Bacilli	o__Bacillales	f__Bacillaceae	g__Bacillus	s__
seq631	0	0	0	0	0	119	0	0	0	0	68	31	k__Bacteria	p__Actinobacteria	c__Actinobacteria	o__Actinomycetales	f__Streptomycetaceae	g__Streptomyces
seq632	0	80	110	0	27	0	0	0	0	0	0	0	k__Bacteria	p__Firmicutes	c__Bacilli	o__Bacillales	f__Paenibacillaceae	g__Ammoniphilus	s__
seq633	0	4	0	0	0	0	0	5	0	162	0	45	k__Bacteria	p__Actinobacteria	c__Actinobacteria	o__Actinomycetales	f__Streptomycetaceae	g__Streptomyces	s__thermoatroviridis
seq634	58	84	36	7	8	6	0	0	0	4	6	6	k__Bacteria	p__Gemmatimonadetes	c__Gemm-3	o__	f__	g__	s__
seq635	32	80	18	32	29	0	0	10	0	0	14	0	k__Bacteria	p__Actinobacteria	c__Actinobacteria	o__Actinomycetales	f__Nocardioidaceae	g__	s__
seq636	0	32	0	25	9	0	50	69	30	0	0	0	k__Bacteria	p__Proteobacteria	c__Deltaproteobacteria	o__Syntrophobacterales	f__Syntrophaceae	g__Syntrophus	s__
seq637	0	35	0	20	0	0	36	46	21	26	15	16	k__Bacteria	p__Firmicutes	c__Clostridia	o__Clostridiales	f__Lachnospiraceae	g__Coprococcus	s__
seq638	0	11	0	0	0	0	0	29	0	140	18	16	k__Bacteria	p__Proteobacteria	c__Alphaproteobacteria	o__Rhodospirillales	f__Acetobacteraceae	g__	s__
seq639	122	52	0	0	0	0	0	3	0	17	5	14	k__Bacteria	p__Proteobacteria	c__Betaproteobacteria	o__Burkholderiales	f__Alcaligenaceae
seq640	14	119	46	0	21	9	0	0	0	0	0	4	k__Bacteria	p__[Thermi]	c__Deinococci	o__Deinococcales	f__Deinococcaceae	g__Deinococcus	s__
seq641	0	32	0	31	15	0	50	61	24	0	0	0	k__Bacteria	p__Firmicutes	c__Clostridia	o__Clostridiales	f__Christensenellaceae	g__	s__
seq642	0	0	0	30	0	0	79	69	34	0	0	0	k__Bacteria	p__Proteobacteria	c__Epsilonproteobacteria	o__Campylobacterales	f__Helicobacteraceae	g__	s__
seq643	0	0	0	130	82	0	0	0	0	0	0	0	k__Bacteria	p__Firmicutes	c__Bacilli	o__Bacillales	f__Planococcaceae	g__Planomicrobium	s__
seq644	0	33	12	47	102	17	0	0	0	0	0	0	k__Bacteria	p__Bacteroidetes	c__Sphingobacteriia	o__Sphingobacteriales	f__Sphingobacteriaceae	g__	s__
seq645	0	0	0	156	0	55	0	0	0	0	0	0	k__Bacteria	p__Firmicutes	c__Bacilli	o__Bacillales	f__Bacillaceae
seq646	0	0	0	0	211	0	0	0	0	0	0	0	k__Bacteria	p__Proteobacteria	c__Gammaproteobacteria	o__Aeromonadales	f__Aeromonadaceae	g__	s__
seq647	0	0	0	0	0	0	0	0	100	0	111	0	k__Bacteria	p__Proteobacteria	c__Gammaproteobacteria	o__Enterobacteriales	f__Enterobacteriaceae	g__Klebsiella	s__
seq648	33	132	27	0	18	0	0	0	0	0	0	0	k__Bacteria	p__Actinobacteria	c__Actinobacteria	o__Actinomycetales	f__Micromonosporaceae
seq649	32	35	143	0	0	0	0	0	0	0	0	0	k__Bacteria	p__Actinobacteria	c__Rubrobacteria	o__Rubrobacterales	f__Rubrobacteraceae	g__Rubrobacter	s__
seq650	0	76	0	0	0	0	0	0	0	50	49	35	k__Bacteria	p__Proteobacteria	c__Alphaproteobacteria	o__Sphingomonadales
seq651	0	31	179	0	0	0	0	0	0	0	0	0	k__Bacteria	p__Proteobacteria	c__Betaproteobacteria	o__Burkholderiales	f__Comamonadaceae
seq652	0	23	0	23	16	44	0	0	0	0	42	62	k__Bacteria	p__Proteobacteria	c__Betaproteobacteria	o__Burkholderiales	f__Oxalobacteraceae
seq653	0	0	0	0	0	0	0	14	0	196	0	0	k__Bacteria	p__Actinobacteria	c__Actinobacteria	o__Actinomycetales
seq654	113	67	19	0	0	10	0	0	0	0	0	0	k__Bacteria	p__Gemmatimonadetes	c__Gemm-3	o__	f__	g__	s__
seq655	20	29	135	0	0	25	0	0	0	0	0	0	k__Bacteria	p__Verrucomicrobia	c__Opitutae	o__Opitutales	f__Opitutaceae	g__Opitutus	s__
seq656	0	96	0	0	0	0	8	12	4	26	39	24	k__Bacteria	p__Bacteroidetes	c__Bacteroidia	o__Bacteroidales	f__Bacteroidaceae	g__Bacteroides	s__
seq657	11	56	52	23	20	13	0	0	0	0	32	0	k__Bacteria	p__Proteobacteria	c__Betaproteobacteria	o__Burkholderiales
seq658	0	15	0	23	0	0	14	11	0	104	0	40	k__Bacteria	p__Actinobacteria	c__Actinobacteria	o__Actinomycetales	f__Pseudonocardiaceae	g__Saccharopolyspora	s__
seq659	122	31	40	0	0	13	0	0	0	0	0	0	k__Bacteria	p__Bacteroidetes	c__Cytophagia	o__Cytophagales	f__Cytophagaceae	g__Rhodocytophaga	s__
seq660	15	0	191	0	0	0	0	0	0	0	0	0	k__Bacteria	p__Proteobacteria	c__Deltaproteobacteria	o__Bdellovibrionales	f__Bdellovibrionaceae	g__Bdellovibrio
seq661	0	15	0	0	19	11	0	0	12	6	134	9	k__Bacteria	p__Proteobacteria	c__Alphaproteobacteria	o__Rhizobiales	f__Rhizobiaceae	g__Agrobacterium	s__
seq662	0	42	0	66	31	67	0	0	0	0	0	0	k__Bacteria	p__Proteobacteria	c__Betaproteobacteria	o__Burkholderiales	f__Oxalobacteraceae
seq663	27	53	15	0	54	8	0	0	0	0	31	17	k__Bacteria	p__Bacteroidetes	c__Cytophagia	o__Cytophagales	f__Cytophagaceae	g__	s__
seq664	68	85	27	0	0	25	0	0	0	0	0	0	k__Bacteria	p__Proteobacteria	c__Alphaproteobacteria	o__Rhodobacterales	f__Rhodobacteraceae	g__Rubellimicrobium	s__
seq665	0	0	0	0	33	44	0	0	16	24	42	46	k__Bacteria	p__Proteobacteria	c__Alphaproteobacteria	o__Caulobacterales	f__Caulobacteraceae	g__Phenylobacterium	s__
seq666	117	10	10	7	16	14	0	0	0	0	30	0	k__Bacteria	p__Actinobacteria	c__Actinobacteria	o__Actinomycetales	f__Actinosynnemataceae	g__Saccharothrix	s__
seq667	0	0	0	0	0	0	70	72	0	62	0	0	k__Bacteria	p__Proteobacteria	c__Alphaproteobacteria	o__Rhizobiales	f__Hyphomicrobiaceae	g__Rhodoplanes	s__
seq668	190	0	0	0	0	13	0	0	0	0	0	0	k__Bacteria	p__Nitrospirae	c__Nitrospira	o__Nitrospirales	f__Nitrospiraceae	g__Nitrospira	s__
seq669	44	95	31	18	15	0	0	0	0	0	0	0	k__Bacteria	p__Proteobacteria	c__Betaproteobacteria	o__Burkholderiales	f__Oxalobacteraceae
seq670	47	0	75	34	47	0	0	0	0	0	0	0	k__Bacteria	p__Proteobacteria	c__Betaproteobacteria	o__Burkholderiales	f__Comamonadaceae
seq671	148	0	54	0	0	0	0	0	0	0	0	0	k__Bacteria	p__Actinobacteria	c__Thermoleophilia	o__Gaiellales	f__Gaiellaceae	g__	s__
seq672	18	25	0	22	23	45	0	0	11	14	32	12	k__Bacteria	p__Proteobacteria	c__Alphaproteobacteria	o__Rhizobiales	f__Hyphomicrobiaceae	g__Devosia	s__
seq673	0	25	0	47	0	0	45	40	44	0	0	0	k__Bacteria	p__Proteobacteria	c__Deltaproteobacteria	o__Syntrophobacterales	f__Syntrophaceae	g__	s__
seq674	114	39	12	16	0	19	0	0	0	0	0	0	k__Bacteria	p__Actinobacteria	c__Acidimicrobiia	o__Acidimicrobiales
seq675	38	35	119	0	0	0	0	0	0	8	0	0	k__Bacteria	p__Actinobacteria	c__MB-A2-108	o__0319-7L14	f__	g__	s__
seq676	0	64	4	0	0	0	25	2	0	45	35	25	k__Bacteria	p__Actinobacteria	c__Actinobacteria	o__Actinomycetales	f__Corynebacteriaceae	g__Corynebacterium	s__
seq677	76	27	10	11	46	15	3	0	0	5	0	6	k__Bacteria	p__Actinobacteria	c__Acidimicrobiia	o__Acidimicrobiales	f__	g__	s__
seq678	74	34	48	23	0	16	0	0	0	4	0	0	k__Bacteria	p__Proteobacteria	c__Alphaproteobacteria	o__Rhizobiales	f__Methylocystaceae
seq679	65	50	24	12	24	9	0	0	0	8	7	0	k__Bacteria	p__Actinobacteria	c__Acidimicrobiia	o__Acidimicrobiales	f__	g__	s__
seq680	0	11	0	43	142	0	0	0	3	0	0	0	k__Bacteria	p__Bacteroidetes	c__Cytophagia	o__Cytophagales	f__Cytophagaceae	g__Adhaeribacter	s__
seq681	0	0	0	0	0	8	0	4	8	92	46	41	k__Bacteria	p__Actinobacteria	c__Actinobacteria	o__Actinomycetales	f__Microbacteriaceae	g__Mycetocola	s__
seq682	110	36	9	0	42	0	0	0	0	0	0	0	k__Bacteria	p__Actinobacteria	c__Actinobacteria	o__Actinomycetales	f__Micromonosporaceae	g__	s__
seq683	20	0	0	0	34	46	0	0	0	27	0	69	k__Bacteria	p__Firmicutes	c__Bacilli	o__Bacillales	f__Bacillaceae	g__Bacillus	s__
seq684	11	38	0	54	59	14	0	0	0	0	20	0	k__Bacteria	p__Firmicutes	c__Bacilli	o__Bacillales	f__Planococcaceae	g__Planomicrobium	s__
seq685	0	36	73	39	48	0	0	0	0	0	0	0	k__Bacteria	p__Proteobacteria	c__Betaproteobacteria	o__Burkholderiales	f__Oxalobacteraceae
seq686	0	0	0	15	13	13	0	46	27	13	35	34	k__Bacteria	p__Actinobacteria	c__Actinobacteria	o__Actinomycetales	f__Thermomonosporaceae	g__Actinomadura
seq687	0	0	0	0	0	66	0	0	0	130	0	0	k__Bacteria	p__Actinobacteria	c__Actinobacteria	o__Actinomycetales	f__Streptomycetaceae	g__Streptomyces	s__
seq688	74	13	108	0	0	0	0	0	0	0	0	0	k__Bacteria	p__Actinobacteria	c__Thermoleophilia	o__Solirubrobacterales	f__	g__	s__
seq689	25	0	163	0	0	7	0	0	0	0	0	0	k__Bacteria	p__Actinobacteria	c__MB-A2-108	o__	f__	g__	s__
seq690	30	0	13	0	24	0	0	0	0	41	69	18	k__Bacteria	p__Proteobacteria	c__Alphaproteobacteria	o__Rhizobiales	f__Bradyrhizobiaceae	g__Balneimonas	s__
seq691	28	0	148	0	0	19	0	0	0	0	0	0	k__Bacteria	p__Actinobacteria	c__Acidimicrobiia	o__Acidimicrobiales	f__	g__	s__
seq692	0	0	0	0	0	0	0	0	111	53	31	0	k__Bacteria	p__Actinobacteria	c__Actinobacteria	o__Actinomycetales	f__Pseudonocardiaceae	g__Pseudonocardia	s__
seq693	173	7	4	0	0	3	0	0	0	4	3	0	k__Bacteria	p__Gemmatimonadetes	c__Gemmatimonadetes	o__	f__	g__	s__
seq694	21	51	0	0	0	0	23	0	0	33	25	41	k__Bacteria	p__Firmicutes	c__Bacilli	o__Turicibacterales	f__Turicibacteraceae	g__Turicibacter	s__
seq695	31	22	19	0	66	56	0	0	0	0	0	0	k__Bacteria	p__Proteobacteria	c__Alphaproteobacteria	o__Sphingomonadales	f__Sphingomonadaceae
seq696	0	49	0	25	0	0	47	41	32	0	0	0	k__Bacteria	p__Firmicutes	c__Clostridia	o__Clostridiales	f__[Mogibacteriaceae]	g__	s__
seq697	0	72	37	0	30	0	0	0	0	55	0	0	k__Bacteria	p__Actinobacteria	c__Actinobacteria	o__Actinomycetales	f__Geodermatophilaceae	g__Geodermatophilus	s__obscurus
seq698	0	0	0	194	0	0	0	0	0	0	0	0	k__Bacteria	p__Firmicutes	c__Bacilli	o__Bacillales	f__Bacillaceae	g__Bacillus	s__badius
seq699	0	0	0	194	0	0	0	0	0	0	0	0	k__Bacteria	p__Firmicutes	c__Bacilli	o__Bacillales	f__Bacillaceae	g__Bacillus	s__badius
seq700	44	26	93	8	12	10	0	0	0	0	0	0	k__Bacteria	p__Firmicutes	c__Clostridia	o__Clostridiales	f__Symbiobacteriaceae	g__Symbiobacterium	s__
seq701	105	87	0	0	0	0	0	0	0	0	0	0	k__Bacteria	p__Gemmatimonadetes	c__Gemm-3	o__	f__	g__	s__
seq702	14	45	0	34	50	15	0	0	0	0	34	0	k__Bacteria	p__Actinobacteria	c__Actinobacteria	o__Actinomycetales	f__Micromonosporaceae	g__Actinoplanes	s__
seq703	0	26	0	29	17	0	39	58	23	0	0	0	k__Bacteria	p__Proteobacteria	c__Betaproteobacteria	o__Rhodocyclales	f__Rhodocyclaceae
seq704	0	0	0	78	0	0	3	3	2	6	0	100	k__Bacteria	p__Proteobacteria	c__Gammaproteobacteria	o__Alteromonadales	f__HTCC2188	g__HTCC	s__
seq705	36	88	0	21	42	0	0	0	0	0	0	4	k__Bacteria	p__Bacteroidetes	c__Cytophagia	o__Cytophagales	f__Cytophagaceae	g__Adhaeribacter	s__
seq706	0	0	0	0	88	50	0	0	0	0	53	0	k__Bacteria	p__Firmicutes	c__Bacilli	o__Bacillales	f__Bacillaceae	g__Bacillus
seq707	41	0	0	0	0	0	49	47	0	53	0	0	k__Bacteria	p__Proteobacteria	c__Alphaproteobacteria	o__Sphingomonadales	f__Sphingomonadaceae	g__Kaistobacter	s__
seq708	97	0	61	0	0	31	0	0	0	0	0	0	k__Bacteria	p__Actinobacteria	c__Actinobacteria	o__Bifidobacteriales	f__Bifidobacteriaceae	g__	s__
seq709	0	70	37	34	35	0	0	0	0	0	13	0	k__Bacteria	p__Proteobacteria	c__Betaproteobacteria	o__Burkholderiales
seq710	0	10	0	0	0	0	0	12	0	150	0	17	k__Bacteria	p__Actinobacteria	c__Actinobacteria	o__Actinomycetales	f__Nocardioidaceae	g__Actinopolymorpha	s__
seq711	0	0	0	4	0	0	0	17	83	51	25	9	k__Bacteria	p__Actinobacteria	c__Actinobacteria	o__Actinomycetales
seq712	0	32	85	0	0	48	0	0	0	0	0	23	k__Bacteria	p__Firmicutes	c__Bacilli	o__Bacillales	f__Paenibacillaceae	g__	s__
seq713	0	13	0	0	0	0	0	32	28	23	91	0	k__Bacteria	p__Proteobacteria	c__Betaproteobacteria	o__Burkholderiales	f__Comamonadaceae
seq714	48	12	116	0	0	10	0	0	0	0	0	0	k__Bacteria	p__Actinobacteria	c__Thermoleophilia	o__Solirubrobacterales	f__	g__	s__
seq715	12	63	5	17	54	0	2	0	0	12	8	13	k__Bacteria	p__Proteobacteria	c__Gammaproteobacteria	o__Xanthomonadales	f__Xanthomonadaceae	g__Lysobacter	s__
seq716	0	37	0	35	0	61	0	0	0	0	53	0	k__Bacteria	p__Actinobacteria	c__Actinobacteria	o__Actinomycetales	f__Microbacteriaceae	g__Microbacterium	s__
seq717	14	47	10	53	34	10	0	0	0	6	11	0	k__Bacteria	p__Actinobacteria	c__Actinobacteria	o__Actinomycetales	f__Micrococcaceae	g__	s__
seq718	47	81	11	14	20	0	0	0	0	0	11	0	k__Bacteria	p__Proteobacteria	c__Alphaproteobacteria	o__Rhizobiales	f__Bradyrhizobiaceae	g__Balneimonas	s__
seq719	68	69	38	9	0	0	0	0	0	0	0	0	k__Bacteria	p__Gemmatimonadetes	c__Gemm-3	o__	f__	g__	s__
seq720	25	16	136	0	0	0	0	0	0	0	0	7	k__Bacteria	p__Actinobacteria	c__MB-A2-108	o__0319-7L14	f__	g__	s__
seq721	127	30	12	7	0	7	0	0	0	0	0	0	k__Bacteria	p__Gemmatimonadetes	c__Gemm-3	o__	f__	g__	s__
seq722	79	49	37	0	18	0	0	0	0	0	0	0	k__Bacteria	p__Gemmatimonadetes	c__Gemm-3	o__	f__	g__	s__
seq723	73	78	0	0	0	13	0	7	5	0	0	7	k__Bacteria	p__Gemmatimonadetes	c__Gemmatimonadetes	o__Gemmatimonadales	f__	g__	s__
seq724	0	22	0	0	0	0	0	20	0	141	0	0	k__Bacteria	p__Actinobacteria	c__Actinobacteria	o__Actinomycetales	f__Nocardioidaceae
seq725	91	0	75	3	0	13	0	0	0	0	0	0	k__Bacteria	p__Proteobacteria	c__Alphaproteobacteria	o__Rhizobiales	f__	g__	s__
seq726	25	86	12	15	20	15	0	0	0	0	8	0	k__Bacteria	p__Proteobacteria	c__Alphaproteobacteria	o__Caulobacterales	f__Caulobacteraceae	g__Phenylobacterium	s__
seq727	0	25	13	36	16	41	0	11	0	15	0	24	k__Bacteria	p__Actinobacteria	c__Actinobacteria	o__Actinomycetales	f__Microbacteriaceae
seq728	0	0	0	24	55	48	0	0	0	0	0	54	k__Bacteria	p__Firmicutes	c__Bacilli	o__Bacillales	f__Bacillaceae	g__Bacillus	s__humi
seq729	0	0	0	96	0	0	0	6	0	4	0	74	k__Bacteria	p__Proteobacteria	c__Alphaproteobacteria	o__Kiloniellales	f__Kiloniellaceae	g__	s__
seq730	165	0	14	0	0	0	0	0	0	0	0	0	k__Bacteria	p__Actinobacteria	c__Acidimicrobiia	o__Acidimicrobiales	f__	g__	s__
seq731	121	19	14	0	6	11	0	0	0	0	5	3	k__Bacteria	p__Actinobacteria	c__Nitriliruptoria	o__Euzebyales	f__Euzebyaceae	g__Euzebya	s__
seq732	0	22	0	27	0	0	43	60	0	0	0	27	k__Bacteria	p__Actinobacteria	c__Actinobacteria	o__Actinomycetales	f__Cellulomonadaceae	g__Cellulomonas	s__
seq733	39	99	21	0	0	0	0	0	0	19	0	0	k__Bacteria	p__Proteobacteria	c__Alphaproteobacteria	o__Rhodospirillales	f__Acetobacteraceae
seq734	29	14	128	0	0	7	0	0	0	0	0	0	k__Bacteria	p__Gemmatimonadetes	c__Gemm-3	o__	f__	g__	s__
seq735	139	0	22	0	0	16	0	0	0	0	0	0	k__Bacteria	p__Actinobacteria	c__Thermoleophilia	o__Solirubrobacterales
seq736	54	103	20	0	0	0	0	0	0	0	0	0	k__Bacteria	p__Verrucomicrobia	c__Opitutae	o__Opitutales	f__Opitutaceae	g__Opitutus	s__
seq737	74	79	24	0	0	0	0	0	0	0	0	0	k__Bacteria	p__Actinobacteria	c__Actinobacteria	o__Actinomycetales
seq738	0	0	0	0	0	0	0	0	0	176	0	0	k__Bacteria	p__Actinobacteria	c__Actinobacteria	o__Actinomycetales	f__Thermomonosporaceae	g__Actinomadura	s__vinacea
seq739	11	8	0	28	49	16	0	0	9	6	24	24	k__Bacteria	p__Proteobacteria	c__Gammaproteobacteria	o__Xanthomonadales	f__Xanthomonadaceae	g__Lysobacter	s__
seq740	0	41	31	32	0	57	0	0	0	0	14	0	k__Bacteria	p__Proteobacteria	c__Betaproteobacteria	o__Burkholderiales	f__Oxalobacteraceae	g__	s__
seq741	0	0	0	0	0	0	72	54	0	46	0	3	k__Bacteria	p__Actinobacteria	c__MB-A2-108	o__0319-7L14	f__	g__	s__
seq742	125	14	10	14	0	0	0	0	0	11	0	0	k__Bacteria	p__Actinobacteria	c__Acidimicrobiia	o__Acidimicrobiales	f__	g__	s__
seq743	133	0	41	0	0	0	0	0	0	0	0	0	k__Bacteria	p__Actinobacteria	c__Acidimicrobiia	o__Acidimicrobiales	f__	g__	s__
seq744	51	71	0	15	19	18	0	0	0	0	0	0	k__Bacteria	p__Proteobacteria	c__Betaproteobacteria	o__Burkholderiales
seq745	8	0	11	42	105	0	0	0	2	0	0	6	k__Bacteria	p__Bacteroidetes	c__Cytophagia	o__Cytophagales	f__Cytophagaceae	g__Adhaeribacter	s__
seq746	0	62	0	8	0	0	10	34	21	15	17	7	k__Bacteria	p__Bacteroidetes	c__Bacteroidia	o__Bacteroidales	f__Porphyromonadaceae
seq747	0	57	94	0	0	0	0	0	0	0	23	0	k__Bacteria	p__Actinobacteria	c__Actinobacteria	o__Actinomycetales	f__Geodermatophilaceae	g__Geodermatophilus
seq748	102	25	46	0	0	0	0	0	0	0	0	0	k__Bacteria	p__Actinobacteria	c__MB-A2-108	o__0319-7L14	f__	g__	s__
seq749	28	89	21	0	35	0	0	0	0	0	0	0	k__Bacteria	p__Proteobacteria	c__Betaproteobacteria	o__Burkholderiales	f__Oxalobacteraceae	g__	s__
seq750	0	173	0	0	0	0	0	0	0	0	0	0	k__Bacteria	p__Bacteroidetes	c__Flavobacteriia	o__Flavobacteriales	f__Cryomorphaceae	g__Coccinistipes	s__vermicola
seq751	0	42	0	52	39	40	0	0	0	0	0	0	k__Bacteria	p__Actinobacteria	c__Actinobacteria	o__Actinomycetales	f__Microbacteriaceae	g__	s__
seq752	0	49	94	0	30	0	0	0	0	0	0	0	k__Bacteria	p__Firmicutes	c__Bacilli	o__Bacillales	f__Paenibacillaceae	g__Ammoniphilus	s__
seq753	166	0	0	0	0	0	6	0	0	0	0	0	k__Bacteria	p__Proteobacteria	c__Betaproteobacteria	o__Burkholderiales	f__Alcaligenaceae	g__Denitrobacter	s__
seq754	17	37	30	28	44	16	0	0	0	0	0	0	k__Bacteria	p__Proteobacteria	c__Betaproteobacteria	o__Burkholderiales
seq755	18	17	106	0	0	31	0	0	0	0	0	0	k__Bacteria	p__Actinobacteria	c__Thermoleophilia	o__Gaiellales	f__Gaiellaceae	g__	s__
seq756	0	0	0	99	0	57	0	0	16	0	0	0	k__Bacteria	p__Actinobacteria	c__Actinobacteria	o__Actinomycetales
seq757	0	0	0	32	140	0	0	0	0	0	0	0	k__Bacteria	p__Firmicutes	c__Bacilli	o__Bacillales	f__Planococcaceae	g__Planomicrobium	s__
seq758	0	0	0	14	94	26	0	0	0	0	38	0	k__Bacteria	p__Firmicutes	c__Bacilli	o__Bacillales
seq759	161	0	0	0	0	10	0	0	0	0	0	0	k__Bacteria	p__Actinobacteria	c__Thermoleophilia	o__Solirubrobacterales	f__	g__	s__
seq760	116	0	52	0	0	3	0	0	0	0	0	0	k__Bacteria	p__Verrucomicrobia	c__[Pedosphaerae]	o__[Pedosphaerales]	f__Ellin517	g__	s__
seq761	12	0	159	0	0	0	0	0	0	0	0	0	k__Bacteria	p__Verrucomicrobia	c__Opitutae	o__Opitutales	f__Opitutaceae	g__Opitutus	s__
seq762	29	0	126	0	0	16	0	0	0	0	0	0	k__Bacteria	p__Actinobacteria	c__Thermoleophilia	o__Gaiellales	f__Gaiellaceae	g__	s__
seq763	35	71	30	7	13	0	0	0	0	10	5	0	k__Bacteria	p__Gemmatimonadetes	c__Gemm-3	o__	f__	g__	s__
seq764	0	0	0	14	0	0	16	0	62	0	68	11	k__Bacteria	p__Planctomycetes
seq765	0	0	0	0	0	103	0	0	0	0	68	0	k__Bacteria	p__Firmicutes	c__Bacilli	o__Bacillales	f__Bacillaceae	g__Bacillus	s__
seq766	64	26	10	28	30	12	0	0	0	0	0	0	k__Bacteria	p__Proteobacteria	c__Alphaproteobacteria	o__Sphingomonadales	f__Erythrobacteraceae	g__	s__
seq767	23	0	147	0	0	0	0	0	0	0	0	0	k__Bacteria	p__Proteobacteria	c__Betaproteobacteria	o__Burkholderiales
seq768	43	44	83	0	0	0	0	0	0	0	0	0	k__Bacteria	p__Proteobacteria	c__Alphaproteobacteria	o__Rhizobiales	f__Bradyrhizobiaceae	g__Balneimonas	s__
seq769	0	0	0	6	0	0	34	43	25	33	19	10	k__Bacteria	p__Cyanobacteria	c__Chloroplast	o__Streptophyta	f__	g__	s__
seq770	22	0	147	0	0	0	0	0	0	0	0	0	k__Bacteria	p__Actinobacteria	c__Acidimicrobiia	o__Acidimicrobiales	f__	g__	s__
seq771	0	0	0	0	0	169	0	0	0	0	0	0	k__Bacteria	p__Firmicutes	c__Bacilli	o__Bacillales
seq772	57	0	105	0	0	6	0	0	0	0	0	0	k__Bacteria	p__Gemmatimonadetes	c__Gemm-3	o__	f__	g__	s__
seq773	84	84	0	0	0	0	0	0	0	0	0	0	k__Bacteria	p__Actinobacteria	c__Actinobacteria	o__Actinomycetales	f__Geodermatophilaceae	g__Geodermatophilus	s__obscurus
seq774	0	47	31	49	41	0	0	0	0	0	0	0	k__Bacteria	p__Proteobacteria	c__Betaproteobacteria	o__Burkholderiales	f__Oxalobacteraceae	g__	s__
seq775	0	86	41	0	40	0	0	0	0	0	0	0	k__Bacteria	p__Proteobacteria	c__Betaproteobacteria	o__Burkholderiales	f__Comamonadaceae
seq776	0	0	15	0	0	60	0	16	0	0	0	76	k__Bacteria	p__Firmicutes	c__Bacilli	o__Bacillales	f__Paenibacillaceae	g__Saccharibacillus	s__kuerlensis
seq777	33	46	9	11	19	9	0	0	0	15	24	0	k__Bacteria	p__Actinobacteria	c__Actinobacteria	o__Actinomycetales	f__Streptosporangiaceae
seq778	14	28	0	23	32	30	0	3	0	0	0	36	k__Bacteria	p__Proteobacteria	c__Alphaproteobacteria	o__Rhodospirillales	f__Rhodospirillaceae
seq779	19	0	147	0	0	0	0	0	0	0	0	0	k__Bacteria	p__Actinobacteria	c__MB-A2-108	o__0319-7L14	f__	g__	s__
seq780	0	29	0	16	0	0	60	61	0	0	0	0	k__Bacteria	p__Actinobacteria	c__Thermoleophilia	o__Gaiellales	f__	g__	s__
seq781	0	0	0	0	0	0	0	11	0	105	23	27	k__Bacteria	p__Actinobacteria	c__Actinobacteria	o__Actinomycetales	f__Nocardioidaceae	g__	s__
seq782	93	30	42	0	0	0	0	0	0	0	0	0	k__Bacteria	p__Proteobacteria	c__Betaproteobacteria	o__Burkholderiales
seq783	111	0	54	0	0	0	0	0	0	0	0	0	k__Bacteria	p__Firmicutes	c__Bacilli	o__Bacillales	f__Bacillaceae	g__Bacillus
seq784	157	0	7	0	0	0	0	0	0	0	0	0	k__Bacteria	p__Gemmatimonadetes	c__Gemmatimonadetes	o__	f__	g__	s__
seq785	30	0	122	0	0	12	0	0	0	0	0	0	k__Bacteria	p__Actinobacteria	c__Rubrobacteria	o__Rubrobacterales	f__Rubrobacteraceae	g__	s__
seq786	20	33	0	0	5	0	18	30	10	26	14	8	k__Bacteria	p__Firmicutes	c__Clostridia	o__Clostridiales	f__Peptostreptococcaceae
seq787	0	4	0	4	0	0	0	21	29	69	0	37	k__Bacteria	p__Chloroflexi	c__Ktedonobacteria	o__Ktedonobacterales	f__Ktedonobacteraceae	g__	s__
seq788	0	0	0	0	0	0	0	164	0	0	0	0	k__Bacteria	p__Cyanobacteria	c__Chloroplast	o__Streptophyta	f__	g__	s__
seq789	80	64	0	0	0	19	0	0	0	0	0	0	k__Bacteria	p__Proteobacteria	c__Betaproteobacteria	o__Burkholderiales
seq790	23	41	0	23	23	53	0	0	0	0	0	0	k__Bacteria	p__Proteobacteria	c__Betaproteobacteria	o__Burkholderiales	f__Comamonadaceae
seq791	0	0	0	43	0	0	45	40	35	0	0	0	k__Bacteria	p__Proteobacteria	c__Betaproteobacteria	o__Rhodocyclales	f__Rhodocyclaceae	g__Dechloromonas	s__
seq792	0	0	0	0	0	0	0	0	0	163	0	0	k__Bacteria	p__Actinobacteria	c__Actinobacteria	o__Actinomycetales	f__Streptomycetaceae
seq793	156	0	0	0	0	6	0	0	0	0	0	0	k__Bacteria	p__Actinobacteria	c__Thermoleophilia	o__Gaiellales	f__Gaiellaceae	g__	s__
seq794	46	7	109	0	0	0	0	0	0	0	0	0	k__Bacteria	p__Actinobacteria	c__Thermoleophilia	o__Solirubrobacterales	f__	g__	s__
seq795	27	22	105	0	0	8	0	0	0	0	0	0	k__Bacteria	p__Actinobacteria	c__Acidimicrobiia	o__Acidimicrobiales	f__	g__	s__
seq796	0	0	0	26	0	0	51	53	32	0	0	0	k__Bacteria	p__Proteobacteria	c__Gammaproteobacteria	o__Xanthomonadales	f__Sinobacteraceae	g__	s__
seq797	88	51	0	0	12	10	0	0	0	0	0	0	k__Bacteria	p__Actinobacteria	c__Actinobacteria	o__Actinomycetales	f__Nocardioidaceae	g__	s__
seq798	27	105	13	10	6	0	0	0	0	0	0	0	k__Bacteria	p__Bacteroidetes	c__[Saprospirae]	o__[Saprospirales]	f__Chitinophagaceae	g__Flavisolibacter	s__
seq799	16	0	145	0	0	0	0	0	0	0	0	0	k__Bacteria	p__Actinobacteria	c__Acidimicrobiia	o__Acidimicrobiales	f__	g__	s__
seq800	44	28	0	0	20	32	0	0	0	0	37	0	k__Bacteria	p__Actinobacteria	c__Actinobacteria	o__Actinomycetales	f__Streptomycetaceae	g__Streptomyces	s__
seq801	0	0	0	0	0	161	0	0	0	0	0	0	k__Bacteria	p__Firmicutes	c__Bacilli	o__Bacillales	f__Bacillaceae	g__Bacillus
seq802	75	59	21	0	0	5	0	0	0	0	0	0	k__Bacteria	p__Verrucomicrobia	c__[Pedosphaerae]	o__[Pedosphaerales]	f__	g__	s__
seq803	0	27	0	13	0	0	25	35	10	24	18	8	k__Bacteria	p__Firmicutes	c__Clostridia	o__Clostridiales	f__Ruminococcaceae	g__Ruminococcus	s__
seq804	28	108	20	0	0	0	0	0	0	0	0	3	k__Bacteria	p__Verrucomicrobia	c__[Spartobacteria]	o__[Chthoniobacterales]	f__[Chthoniobacteraceae]	g__	s__
seq805	18	17	9	7	15	51	0	0	2	3	26	10	k__Bacteria	p__Proteobacteria	c__Alphaproteobacteria	o__Rhodospirillales	f__Rhodospirillaceae	g__Inquilinus	s__
seq806	11	26	0	0	0	0	30	48	12	31	0	0	k__Bacteria	p__Proteobacteria	c__Alphaproteobacteria	o__Rhizobiales	f__Bradyrhizobiaceae	g__Bradyrhizobium	s__
seq807	0	63	32	0	63	0	0	0	0	0	0	0	k__Bacteria	p__Proteobacteria	c__Betaproteobacteria	o__Burkholderiales	f__Oxalobacteraceae
seq808	0	62	72	0	24	0	0	0	0	0	0	0	k__Bacteria	p__Proteobacteria	c__Betaproteobacteria
seq809	25	11	103	0	0	18	0	0	0	0	0	0	k__Bacteria	p__Gemmatimonadetes	c__Gemmatimonadetes	o__	f__	g__	s__
seq810	35	0	82	0	0	40	0	0	0	0	0	0	k__Bacteria	p__Actinobacteria	c__Actinobacteria	o__Actinomycetales	f__Nocardioidaceae	g__	s__
seq811	0	5	0	9	0	0	0	0	0	48	0	95	k__Bacteria	p__Actinobacteria	c__Actinobacteria	o__Actinomycetales	f__Pseudonocardiaceae
seq812	0	6	0	32	119	0	0	0	0	0	0	0	k__Bacteria	p__Proteobacteria	c__Alphaproteobacteria	o__Sphingomonadales	f__Sphingomonadaceae
seq813	0	0	0	29	128	0	0	0	0	0	0	0	k__Bacteria	p__Firmicutes	c__Bacilli	o__Bacillales	f__Bacillaceae	g__Bacillus	s__
seq814	0	0	0	0	0	0	63	55	0	39	0	0	k__Bacteria	p__Actinobacteria	c__MB-A2-108	o__0319-7L14	f__	g__	s__
seq815	35	13	108	0	0	0	0	0	0	0	0	0	k__Bacteria	p__Bacteroidetes	c__[Saprospirae]	o__[Saprospirales]	f__Chitinophagaceae	g__Flavisolibacter	s__
seq816	16	32	79	0	29	0	0	0	0	0	0	0	k__Bacteria	p__Proteobacteria	c__Betaproteobacteria	o__Burkholderiales
seq817	0	0	0	0	0	26	0	10	0	120	0	0	k__Bacteria	p__Actinobacteria	c__Actinobacteria	o__Actinomycetales	f__Bogoriellaceae	g__Georgenia	s__
seq818	0	21	134	0	0	0	0	0	0	0	0	0	k__Bacteria	p__Proteobacteria	c__Betaproteobacteria	o__Burkholderiales	f__Comamonadaceae	g__Rubrivivax	s__
seq819	0	0	0	17	56	82	0	0	0	0	0	0	k__Bacteria	p__Firmicutes	c__Bacilli	o__Bacillales	f__Paenibacillaceae	g__	s__
seq820	0	0	0	0	70	85	0	0	0	0	0	0	k__Bacteria	p__Firmicutes	c__Bacilli	o__Bacillales
seq821	0	0	0	0	7	69	0	0	0	0	39	40	k__Bacteria	p__Proteobacteria	c__Betaproteobacteria	o__Burkholderiales	f__Oxalobacteraceae
seq822	45	38	25	0	34	0	0	0	0	12	0	0	k__Bacteria	p__Gemmatimonadetes	c__Gemm-3	o__	f__	g__	s__
seq823	46	97	0	11	0	0	0	0	0	0	0	0	k__Bacteria	p__Gemmatimonadetes	c__Gemm-3	o__	f__	g__	s__
seq824	0	28	0	16	12	0	30	30	38	0	0	0	k__Bacteria	p__Bacteroidetes	c__Bacteroidia	o__Bacteroidales	f__	g__	s__
seq825	0	30	0	13	27	0	39	26	19	0	0	0	k__Bacteria	p__Proteobacteria	c__Deltaproteobacteria	o__Desulfobacterales	f__Desulfobulbaceae	g__Desulfobulbus	s__
seq826	0	29	0	17	0	0	34	44	30	0	0	0	k__Bacteria	p__Actinobacteria	c__Actinobacteria	o__Actinomycetales
seq827	0	17	0	0	0	0	0	32	0	100	5	0	k__Bacteria	p__Actinobacteria	c__Acidimicrobiia	o__Acidimicrobiales	f__AKIW874	g__	s__
seq828	0	0	0	52	102	0	0	0	0	0	0	0	k__Bacteria	p__Bacteroidetes	c__Cytophagia	o__Cytophagales	f__Cytophagaceae	g__Dyadobacter	s__
seq829	42	55	12	0	15	12	0	0	0	9	7	0	k__Bacteria	p__Gemmatimonadetes	c__Gemmatimonadetes
seq830	49	9	94	0	0	0	0	0	0	0	0	0	k__Bacteria	p__Actinobacteria	c__Thermoleophilia	o__Solirubrobacterales	f__	g__	s__
seq831	20	33	23	47	28	0	0	0	0	0	0	0	k__Bacteria	p__Bacteroidetes	c__Cytophagia	o__Cytophagales	f__Cytophagaceae	g__Adhaeribacter	s__
seq832	0	24	0	14	36	0	31	34	0	12	0	0	k__Bacteria	p__Firmicutes	c__Clostridia	o__Clostridiales	f__Clostridiaceae	g__Clostridium
seq833	0	78	37	20	0	0	0	0	0	16	0	0	k__Bacteria	p__Gemmatimonadetes	c__Gemmatimonadetes	o__Gemmatimonadales
seq834	0	36	0	0	75	40	0	0	0	0	0	0	k__Bacteria	p__Proteobacteria	c__Alphaproteobacteria	o__Sphingomonadales	f__Sphingomonadaceae
seq835	0	0	0	0	0	0	0	94	0	57	0	0	k__Bacteria	p__Proteobacteria	c__Gammaproteobacteria	o__Vibrionales	f__Vibrionaceae	g__Vibrio	s__
seq836	0	0	0	0	0	0	0	14	50	70	0	17	k__Bacteria	p__Actinobacteria	c__Actinobacteria	o__Actinomycetales	f__Streptomycetaceae	g__Streptomyces	s__thermoatroviridis
seq837	123	27	0	0	0	0	0	0	0	0	0	0	k__Bacteria	p__Actinobacteria	c__Acidimicrobiia	o__Acidimicrobiales	f__	g__	s__
seq838	17	35	0	31	51	16	0	0	0	0	0	0	k__Bacteria	p__Proteobacteria	c__Alphaproteobacteria	o__Rhodospirillales	f__Rhodospirillaceae	g__Azospirillum	s__
seq839	0	33	0	0	53	0	0	0	0	22	0	42	k__Bacteria	p__Firmicutes	c__Bacilli	o__Bacillales	f__Bacillaceae	g__Bacillus	s__
seq840	0	10	0	7	16	0	0	0	0	0	101	16	k__Bacteria	p__Bacteroidetes	c__[Saprospirae]	o__[Saprospirales]	f__Chitinophagaceae	g__Flavisolibacter	s__
seq841	0	0	67	24	26	33	0	0	0	0	0	0	k__Bacteria	p__Proteobacteria	c__Betaproteobacteria	o__Burkholderiales	f__Comamonadaceae
seq842	0	0	0	99	36	0	0	0	0	0	0	15	k__Bacteria	p__Firmicutes	c__Bacilli	o__Bacillales	f__Planococcaceae
seq843	82	13	39	0	0	15	0	0	0	0	0	0	k__Bacteria	p__Chloroflexi	c__TK10	o__AKYG885	f__Dolo_23	g__	s__
seq844	0	149	0	0	0	0	0	0	0	0	0	0	k__Bacteria	p__Actinobacteria	c__Actinobacteria	o__Actinomycetales	f__Mycobacteriaceae	g__Mycobacterium	s__
seq845	0	0	0	0	25	87	0	0	0	0	37	0	k__Bacteria	p__Firmicutes	c__Bacilli	o__Bacillales	f__Paenibacillaceae	g__	s__
seq846	115	15	18	0	0	0	0	0	0	0	0	0	k__Bacteria	p__Verrucomicrobia	c__[Pedosphaerae]	o__[Pedosphaerales]
seq847	107	13	20	0	0	8	0	0	0	0	0	0	k__Bacteria	p__Chloroflexi	c__Ellin6529	o__	f__	g__	s__
seq848	42	25	38	10	0	20	0	0	0	0	13	0	k__Bacteria	p__Gemmatimonadetes	c__Gemm-3	o__	f__	g__	s__
seq849	94	0	54	0	0	0	0	0	0	0	0	0	k__Bacteria	p__Proteobacteria	c__Betaproteobacteria	o__	f__	g__	s__
seq850	19	30	43	0	33	23	0	0	0	0	0	0	k__Bacteria	p__Proteobacteria	c__Alphaproteobacteria	o__Sphingomonadales	f__Sphingomonadaceae
seq851	0	0	0	0	0	0	148	0	0	0	0	0	k__Bacteria	p__Proteobacteria	c__Alphaproteobacteria	o__Rhodobacterales	f__Rhodobacteraceae
seq852	0	0	0	0	0	0	0	91	0	57	0	0	k__Bacteria	p__Proteobacteria	c__Gammaproteobacteria	o__Legionellales	f__Coxiellaceae	g__	s__
seq853	0	0	0	0	0	0	0	13	0	41	18	76	k__Bacteria	p__Actinobacteria	c__Actinobacteria	o__Actinomycetales	f__Pseudonocardiaceae	g__Saccharopolyspora	s__
seq854	125	5	12	0	0	5	0	0	0	0	0	0	k__Bacteria	p__Proteobacteria	c__Alphaproteobacteria	o__Rhodospirillales	f__Rhodospirillaceae	g__	s__
seq855	59	0	20	12	34	16	0	0	0	0	6	0	k__Bacteria	p__Proteobacteria	c__Alphaproteobacteria	o__Sphingomonadales	f__Sphingomonadaceae	g__	s__
seq856	118	0	29	0	0	0	0	0	0	0	0	0	k__Bacteria	p__Actinobacteria	c__Acidimicrobiia	o__Acidimicrobiales	f__	g__	s__
seq857	32	0	115	0	0	0	0	0	0	0	0	0	k__Bacteria	p__Gemmatimonadetes	c__Gemm-3	o__	f__	g__	s__
seq858	58	64	0	25	0	0	0	0	0	0	0	0	k__Bacteria	p__Actinobacteria	c__Actinobacteria	o__Actinomycetales	f__Sporichthyaceae	g__	s__
seq859	0	30	0	21	0	0	34	36	26	0	0	0	k__Bacteria	p__Proteobacteria	c__Betaproteobacteria	o__Rhodocyclales	f__Rhodocyclaceae
seq860	0	0	0	0	0	0	53	56	0	38	0	0	k__Bacteria	p__Actinobacteria	c__Actinobacteria	o__Actinomycetales	f__Nocardioidaceae	g__	s__
seq861	0	0	0	0	0	0	0	0	0	147	0	0	k__Bacteria	p__Actinobacteria	c__Actinobacteria	o__Actinomycetales	f__Dermabacteraceae	g__Brachybacterium
seq862	0	77	69	0	0	0	0	0	0	0	0	0	k__Bacteria	p__Proteobacteria	c__Betaproteobacteria	o__Burkholderiales	f__Oxalobacteraceae	g__	s__
seq863	0	0	0	70	76	0	0	0	0	0	0	0	k__Bacteria	p__Firmicutes	c__Bacilli	o__Bacillales	f__Planococcaceae	g__Planomicrobium	s__
seq864	0	0	0	0	0	0	0	0	0	0	31	115	k__Bacteria	p__Firmicutes	c__Bacilli	o__Bacillales	f__Paenibacillaceae	g__	s__
seq865	0	0	0	75	34	36	0	0	0	0	0	0	k__Bacteria	p__Proteobacteria	c__Betaproteobacteria	o__Burkholderiales	f__Oxalobacteraceae
seq866	66	0	70	0	0	8	0	0	0	0	0	0	k__Bacteria	p__Gemmatimonadetes	c__Gemmatimonadetes	o__C114	f__	g__	s__
seq867	31	7	101	0	0	5	0	0	0	0	0	0	k__Bacteria	p__Proteobacteria	c__Deltaproteobacteria	o__Myxococcales	f__Myxococcaceae	g__Myxococcus	s__
seq868	55	89	0	0	0	0	0	0	0	0	0	0	k__Bacteria	p__Gemmatimonadetes	c__Gemm-3	o__	f__	g__	s__
seq869	0	13	0	0	0	0	0	30	0	93	8	0	k__Bacteria	p__Actinobacteria	c__Actinobacteria	o__Actinomycetales	f__Microbacteriaceae	g__Microbacterium	s__
seq870	0	0	0	21	9	0	52	53	9	0	0	0	k__Bacteria	p__Proteobacteria	c__Deltaproteobacteria	o__Myxococcales	f__	g__	s__
seq871	49	0	94	0	0	0	0	0	0	0	0	0	k__Bacteria	p__Actinobacteria	c__Actinobacteria	o__Actinomycetales	f__Cellulomonadaceae	g__Cellulomonas	s__
seq872	0	3	0	6	2	0	0	0	5	13	13	101	k__Bacteria	p__Bacteroidetes	c__Cytophagia	o__Cytophagales	f__Cytophagaceae	g__	s__
seq873	136	6	0	0	0	0	0	0	0	0	0	0	k__Bacteria	p__Verrucomicrobia	c__[Pedosphaerae]	o__[Pedosphaerales]	f__Ellin517	g__	s__
seq874	123	0	6	0	0	13	0	0	0	0	0	0	k__Bacteria	p__Nitrospirae	c__Nitrospira	o__Nitrospirales	f__Nitrospiraceae	g__	s__
seq875	0	0	142	0	0	0	0	0	0	0	0	0	k__Bacteria	p__Actinobacteria	c__Actinobacteria	o__Actinomycetales	f__Sporichthyaceae	g__	s__
seq876	0	0	0	0	0	14	0	0	12	0	81	35	k__Bacteria	p__Proteobacteria	c__Betaproteobacteria	o__Burkholderiales	f__Alcaligenaceae
seq877	0	0	0	0	0	30	0	0	0	0	61	51	k__Bacteria	p__Firmicutes	c__Bacilli	o__Bacillales	f__Paenibacillaceae	g__	s__
seq878	0	0	0	0	0	0	61	48	16	17	0	0	k__Bacteria	p__Firmicutes	c__Clostridia	o__Clostridiales	f__Clostridiaceae	g__Clostridium	s__butyricum
seq879	0	0	0	0	0	0	0	0	0	0	48	94	k__Bacteria	p__Firmicutes	c__Bacilli	o__Bacillales	f__Paenibacillaceae	g__Paenibacillus
seq880	0	0	0	0	0	0	0	0	0	0	0	142	k__Bacteria	p__Firmicutes	c__Bacilli	o__Bacillales	f__Bacillaceae	g__Bacillus	s__
seq881	106	0	13	0	0	22	0	0	0	0	0	0	k__Bacteria	p__Proteobacteria	c__Betaproteobacteria	o__	f__	g__	s__
seq882	37	66	23	4	3	0	0	6	0	2	0	0	k__Bacteria	p__Chloroflexi	c__Chloroflexi	o__AKIW781	f__	g__	s__
seq883	26	0	110	0	0	5	0	0	0	0	0	0	k__Bacteria	p__Actinobacteria	c__MB-A2-108	o__0319-7L14	f__	g__	s__
seq884	22	71	26	22	0	0	0	0	0	0	0	0	k__Bacteria	p__Proteobacteria	c__Betaproteobacteria	o__Burkholderiales	f__Oxalobacteraceae	g__	s__
seq885	0	0	0	0	0	0	0	0	0	0	0	141	k__Bacteria	p__Proteobacteria	c__Gammaproteobacteria	o__Pseudomonadales	f__Pseudomonadaceae	g__Pseudomonas	s__
seq886	122	0	13	0	0	5	0	0	0	0	0	0	k__Bacteria	p__Actinobacteria	c__MB-A2-108	o__0319-7L14	f__	g__	s__
seq887	108	14	15	0	0	3	0	0	0	0	0	0	k__Bacteria	p__Actinobacteria	c__Acidimicrobiia	o__Acidimicrobiales	f__	g__	s__
seq888	24	0	0	71	45	0	0	0	0	0	0	0	k__Bacteria	p__Firmicutes	c__Bacilli	o__Bacillales	f__Planococcaceae	g__Planomicrobium	s__
seq889	0	71	69	0	0	0	0	0	0	0	0	0	k__Bacteria	p__Proteobacteria	c__Betaproteobacteria	o__Burkholderiales	f__Comamonadaceae
seq890	0	0	0	0	0	0	31	40	0	69	0	0	k__Bacteria	p__Actinobacteria	c__Thermoleophilia	o__Gaiellales	f__Gaiellaceae	g__	s__
seq891	0	0	0	0	0	0	0	33	0	107	0	0	k__Bacteria	p__Actinobacteria	c__Actinobacteria	o__Actinomycetales	f__Microbacteriaceae	g__Leucobacter	s__
seq892	56	7	67	0	0	0	0	0	0	9	0	0	k__Bacteria	p__Actinobacteria	c__Thermoleophilia	o__Solirubrobacterales	f__	g__	s__
seq893	96	36	0	7	0	0	0	0	0	0	0	0	k__Bacteria	p__Gemmatimonadetes	c__Gemm-3	o__	f__	g__	s__
seq894	38	0	0	0	0	0	0	7	0	94	0	0	k__Archaea	p__Crenarchaeota	c__Thaumarchaeota	o__Nitrososphaerales	f__Nitrososphaeraceae	g__Candidatus Nitrososphaera	s__
seq895	39	48	22	19	0	0	0	0	0	11	0	0	k__Bacteria	p__Proteobacteria	c__Betaproteobacteria	o__Burkholderiales	f__Comamonadaceae	g__Ramlibacter	s__
seq896	39	0	100	0	0	0	0	0	0	0	0	0	k__Bacteria	p__Firmicutes	c__Bacilli	o__Bacillales	f__Bacillaceae	g__Bacillus	s__
seq897	21	0	118	0	0	0	0	0	0	0	0	0	k__Bacteria	p__Actinobacteria	c__Acidimicrobiia	o__Acidimicrobiales
seq898	0	0	0	44	26	48	0	0	0	0	0	21	k__Bacteria	p__Proteobacteria	c__Betaproteobacteria	o__Burkholderiales	f__Oxalobacteraceae
seq899	0	0	0	13	0	0	54	53	19	0	0	0	k__Bacteria	p__Actinobacteria	c__OPB41	o__	f__	g__	s__
seq900	79	0	40	0	9	10	0	0	0	0	0	0	k__Bacteria	p__Firmicutes	c__Bacilli	o__Bacillales	f__Bacillaceae
seq901	24	74	17	3	9	6	0	0	0	0	5	0	k__Bacteria	p__Gemmatimonadetes	c__Gemm-3	o__	f__	g__	s__
seq902	45	38	32	23	0	0	0	0	0	0	0	0	k__Bacteria	p__Actinobacteria	c__Actinobacteria	o__Actinomycetales
seq903	22	75	41	0	0	0	0	0	0	0	0	0	k__Bacteria	p__Proteobacteria	c__Betaproteobacteria	o__Burkholderiales	f__Oxalobacteraceae	g__	s__
seq904	0	18	0	0	0	0	26	29	9	33	23	0	k__Bacteria	p__Proteobacteria	c__Gammaproteobacteria	o__Enterobacteriales	f__Enterobacteriaceae	g__Trabulsiella
seq905	0	0	0	0	30	39	0	0	0	0	53	16	k__Bacteria	p__Proteobacteria	c__Betaproteobacteria	o__Burkholderiales	f__Oxalobacteraceae
seq906	0	0	0	0	0	0	0	0	0	0	103	35	k__Bacteria	p__Proteobacteria	c__Betaproteobacteria	o__Burkholderiales	f__Oxalobacteraceae	g__Cupriavidus
seq907	45	0	85	0	0	7	0	0	0	0	0	0	k__Bacteria	p__Chloroflexi	c__Chloroflexi	o__AKIW781	f__	g__	s__
seq908	47	41	34	0	0	6	0	0	0	9	0	0	k__Bacteria	p__Actinobacteria	c__Thermoleophilia	o__Gaiellales	f__AK1AB1_02E	g__	s__
seq909	79	0	58	0	0	0	0	0	0	0	0	0	k__Bacteria	p__Actinobacteria	c__Acidimicrobiia	o__Acidimicrobiales	f__	g__	s__
seq910	49	55	18	14	0	0	0	0	0	0	0	0	k__Bacteria	p__Proteobacteria	c__Alphaproteobacteria	o__Sphingomonadales	f__Sphingomonadaceae
seq911	17	0	117	0	0	0	0	0	0	2	0	0	k__Bacteria	p__Actinobacteria	c__Acidimicrobiia	o__Acidimicrobiales	f__	g__	s__
seq912	28	78	20	0	10	0	0	0	0	0	0	0	k__Archaea	p__Euryarchaeota	c__Thermoplasmata	o__E2	f__	g__	s__
seq913	0	97	39	0	0	0	0	0	0	0	0	0	k__Bacteria	p__Proteobacteria	c__Betaproteobacteria	o__Burkholderiales
seq914	0	17	0	56	63	0	0	0	0	0	0	0	k__Bacteria	p__Bacteroidetes	c__Cytophagia	o__Cytophagales	f__Cytophagaceae	g__Adhaeribacter	s__
seq915	0	0	136	0	0	0	0	0	0	0	0	0	k__Bacteria	p__Proteobacteria	c__Betaproteobacteria	o__Burkholderiales	f__Oxalobacteraceae
seq916	0	0	11	0	0	0	51	36	0	38	0	0	k__Bacteria	p__Proteobacteria	c__Alphaproteobacteria	o__Rhizobiales	f__Hyphomicrobiaceae	g__Rhodoplanes	s__
seq917	70	0	54	0	0	0	0	0	0	0	11	0	k__Bacteria	p__Chloroflexi	c__Chloroflexi	o__Herpetosiphonales	f__	g__	s__
seq918	53	0	82	0	0	0	0	0	0	0	0	0	k__Bacteria	p__Actinobacteria	c__Thermoleophilia	o__Gaiellales	f__Gaiellaceae	g__	s__
seq919	25	9	8	10	28	23	0	0	0	0	18	14	k__Bacteria	p__Bacteroidetes	c__Cytophagia	o__Cytophagales
seq920	0	19	0	0	0	0	0	0	0	31	59	26	k__Bacteria	p__Proteobacteria	c__Alphaproteobacteria	o__Rhodobacterales	f__Rhodobacteraceae	g__Paracoccus	s__
seq921	0	0	0	22	50	49	0	0	0	14	0	0	k__Bacteria	p__Firmicutes	c__Bacilli	o__Bacillales	f__Paenibacillaceae	g__	s__
seq922	0	0	0	3	0	7	0	11	0	61	28	25	k__Bacteria	p__Actinobacteria	c__Actinobacteria	o__Actinomycetales	f__Nocardioidaceae
seq923	70	33	31	0	0	0	0	0	0	0	0	0	k__Bacteria	p__Proteobacteria	c__Betaproteobacteria	o__	f__	g__	s__
seq924	19	0	110	0	0	5	0	0	0	0	0	0	k__Bacteria	p__Actinobacteria	c__MB-A2-108	o__0319-7L14	f__	g__	s__
seq925	0	84	20	0	25	0	0	0	0	5	0	0	k__Bacteria	p__Bacteroidetes	c__[Saprospirae]	o__[Saprospirales]	f__Chitinophagaceae	g__	s__
seq926	0	60	0	0	74	0	0	0	0	0	0	0	k__Bacteria	p__Proteobacteria	c__Alphaproteobacteria	o__Sphingomonadales	f__Sphingomonadaceae
seq927	0	34	0	0	100	0	0	0	0	0	0	0	k__Bacteria	p__Proteobacteria	c__Alphaproteobacteria	o__Sphingomonadales	f__Sphingomonadaceae	g__Sphingomonas	s__
seq928	0	0	0	10	56	33	0	0	0	0	18	17	k__Bacteria	p__Firmicutes	c__Bacilli	o__Bacillales	f__Bacillaceae
seq929	0	0	0	0	18	0	48	68	0	0	0	0	k__Bacteria	p__Proteobacteria	c__Deltaproteobacteria	o__Syntrophobacterales	f__Syntrophaceae	g__	s__
seq930	0	0	0	0	0	0	53	58	0	23	0	0	k__Bacteria	p__Chloroflexi	c__Anaerolineae	o__A31	f__	g__	s__
seq931	0	0	0	0	0	0	0	75	0	59	0	0	k__Bacteria	p__Bacteroidetes	c__Flavobacteriia	o__Flavobacteriales	f__Flavobacteriaceae	g__Polaribacter	s__
seq932	67	0	66	0	0	0	0	0	0	0	0	0	k__Bacteria	p__Gemmatimonadetes	c__Gemm-3	o__	f__	g__	s__
seq933	25	19	0	34	31	24	0	0	0	0	0	0	k__Bacteria	p__Proteobacteria	c__Alphaproteobacteria	o__Caulobacterales	f__Caulobacteraceae	g__Phenylobacterium	s__
seq934	27	0	0	0	17	38	0	0	0	0	13	38	k__Bacteria	p__Firmicutes	c__Bacilli	o__Bacillales	f__Bacillaceae	g__Bacillus	s__
seq935	14	71	34	5	4	5	0	0	0	0	0	0	k__Bacteria	p__[Thermi]	c__Deinococci	o__Deinococcales	f__Deinococcaceae	g__Deinococcus	s__
seq936	70	39	24	0	0	0	0	0	0	0	0	0	k__Bacteria	p__Proteobacteria	c__Betaproteobacteria	o__Burkholderiales
seq937	0	26	0	0	0	0	0	20	0	48	12	27	k__Bacteria	p__Firmicutes	c__Clostridia	o__Clostridiales	f__Lachnospiraceae	g__Coprococcus	s__
seq938	0	0	121	0	0	12	0	0	0	0	0	0	k__Bacteria	p__Firmicutes	c__Bacilli	o__Bacillales	f__Paenibacillaceae	g__	s__
seq939	0	0	0	0	0	72	0	0	0	0	0	61	k__Bacteria	p__Firmicutes	c__Bacilli	o__Bacillales	f__Planococcaceae
seq940	0	0	0	0	0	63	0	0	0	0	46	24	k__Bacteria	p__Firmicutes	c__Bacilli	o__Bacillales	f__Paenibacillaceae	g__	s__
seq941	0	0	0	0	0	0	0	0	0	115	0	18	k__Bacteria	p__Actinobacteria	c__Actinobacteria	o__Actinomycetales	f__Pseudonocardiaceae	g__Pseudonocardia	s__
seq942	28	0	95	0	0	9	0	0	0	0	0	0	k__Bacteria	p__Actinobacteria	c__Acidimicrobiia	o__Acidimicrobiales	f__	g__	s__
seq943	2	2	0	0	0	0	0	0	0	125	3	0	k__Bacteria	p__Actinobacteria	c__Actinobacteria	o__Actinomycetales	f__Nocardioidaceae
seq944	0	4	0	0	0	0	0	7	0	121	0	0	k__Bacteria	p__Actinobacteria	c__Actinobacteria	o__Actinomycetales	f__Tsukamurellaceae	g__Tsukamurella	s__
seq945	0	0	132	0	0	0	0	0	0	0	0	0	k__Bacteria	p__Gemmatimonadetes	c__Gemm-3	o__	f__	g__	s__
seq946	0	0	84	0	48	0	0	0	0	0	0	0	k__Bacteria	p__Bacteroidetes	c__Cytophagia	o__Cytophagales	f__Cytophagaceae	g__Adhaeribacter	s__
seq947	0	0	0	0	74	34	0	0	0	0	24	0	k__Bacteria	p__Cyanobacteria	c__ML635J-21	o__	f__	g__	s__
seq948	0	0	0	0	0	0	65	28	0	39	0	0	k__Bacteria	p__Actinobacteria	c__Thermoleophilia	o__Gaiellales	f__Gaiellaceae	g__	s__
seq949	0	0	0	0	0	0	0	65	0	67	0	0	k__Bacteria	p__Proteobacteria	c__Gammaproteobacteria	o__Alteromonadales	f__HTCC2188	g__HTCC	s__
seq950	86	0	28	0	0	17	0	0	0	0	0	0	k__Bacteria	p__Actinobacteria	c__Thermoleophilia	o__Solirubrobacterales
seq951	14	0	117	0	0	0	0	0	0	0	0	0	k__Bacteria	p__Gemmatimonadetes	c__Gemm-3	o__	f__	g__	s__
seq952	0	21	0	10	0	0	28	20	8	26	12	6	k__Bacteria	p__Firmicutes	c__Clostridia	o__Clostridiales	f__Ruminococcaceae	g__Ruminococcus	s__
seq953	0	49	66	0	0	16	0	0	0	0	0	0	k__Bacteria	p__Verrucomicrobia	c__[Pedosphaerae]	o__[Pedosphaerales]	f__	g__	s__
seq954	0	0	0	17	0	0	46	42	26	0	0	0	k__Bacteria	p__Firmicutes	c__Clostridia	o__Clostridiales	f__Lachnospiraceae	g__Coprococcus	s__
seq955	104	0	15	0	0	11	0	0	0	0	0	0	k__Bacteria	p__Actinobacteria	c__Rubrobacteria	o__Rubrobacterales	f__Rubrobacteraceae	g__	s__
seq956	71	42	17	0	0	0	0	0	0	0	0	0	k__Bacteria	p__Actinobacteria	c__Acidimicrobiia	o__Acidimicrobiales
seq957	14	63	6	18	0	0	0	0	0	12	8	9	k__Bacteria	p__Proteobacteria	c__Alphaproteobacteria	o__Sphingomonadales	f__Sphingomonadaceae	g__Novosphingobium	s__
seq958	0	0	0	0	0	0	122	6	0	2	0	0	k__Bacteria	p__Proteobacteria	c__Alphaproteobacteria
seq959	11	9	106	0	0	3	0	0	0	0	0	0	k__Bacteria	p__Gemmatimonadetes	c__Gemm-3	o__	f__	g__	s__
seq960	17	0	20	0	13	79	0	0	0	0	0	0	k__Bacteria	p__Proteobacteria	c__Gammaproteobacteria	o__Xanthomonadales	f__Sinobacteraceae	g__	s__
seq961	42	53	34	0	0	0	0	0	0	0	0	0	k__Bacteria	p__Actinobacteria	c__Actinobacteria	o__Actinomycetales
seq962	19	0	0	0	0	0	0	0	6	24	80	0	k__Bacteria	p__Proteobacteria	c__Deltaproteobacteria	o__Myxococcales
seq963	40	28	61	0	0	0	0	0	0	0	0	0	k__Archaea	p__Euryarchaeota	c__Thermoplasmata	o__E2	f__	g__	s__
seq964	0	37	24	0	42	6	0	0	0	0	8	12	k__Bacteria	p__Proteobacteria	c__Alphaproteobacteria	o__Rhodospirillales	f__Acetobacteraceae	g__	s__
seq965	0	7	0	0	0	0	0	27	0	92	3	0	k__Bacteria	p__Chloroflexi	c__S085	o__	f__	g__	s__
seq966	0	129	0	0	0	0	0	0	0	0	0	0	k__Bacteria	p__Proteobacteria	c__Betaproteobacteria	o__Burkholderiales	f__Oxalobacteraceae	g__	s__
seq967	105	7	9	3	0	4	0	0	0	0	0	0	k__Bacteria	p__Chloroflexi	c__Thermomicrobia	o__JG30-KF-CM45	f__	g__	s__
seq968	15	0	113	0	0	0	0	0	0	0	0	0	k__Bacteria	p__Actinobacteria	c__MB-A2-108	o__0319-7L14	f__	g__	s__
seq969	16	76	10	0	26	0	0	0	0	0	0	0	k__Bacteria	p__Proteobacteria	c__Betaproteobacteria	o__Burkholderiales	f__Oxalobacteraceae
seq970	0	0	0	41	0	0	0	0	28	0	25	34	k__Bacteria	p__Firmicutes	c__Bacilli	o__Lactobacillales	f__Enterococcaceae	g__Enterococcus	s__
seq971	0	0	0	0	0	20	0	0	0	0	58	50	k__Bacteria	p__Firmicutes	c__Bacilli	o__Bacillales	f__Bacillaceae	g__Bacillus	s__foraminis
seq972	0	0	0	0	0	0	0	14	55	0	53	6	k__Bacteria	p__Proteobacteria	c__Alphaproteobacteria	o__Rhodobacterales	f__Rhodobacteraceae
seq973	43	75	9	0	0	0	0	0	0	0	0	0	k__Bacteria	p__Proteobacteria	c__Betaproteobacteria	o__Burkholderiales	f__Oxalobacteraceae
seq974	127	0	0	0	0	0	0	0	0	0	0	0	k__Bacteria	p__Actinobacteria	c__Rubrobacteria	o__Rubrobacterales	f__Rubrobacteraceae	g__Rubrobacter	s__
seq975	0	33	0	14	0	0	0	26	0	22	18	14	k__Bacteria	p__Proteobacteria	c__Gammaproteobacteria	o__Vibrionales	f__Vibrionaceae	g__Vibrio	s__
seq976	0	0	0	0	0	0	71	35	0	21	0	0	k__Bacteria	p__Proteobacteria	c__Alphaproteobacteria	o__Rhodospirillales	f__Rhodospirillaceae	g__	s__
seq977	0	0	0	0	0	0	0	0	26	70	12	19	k__Bacteria	p__Actinobacteria	c__Actinobacteria	o__Actinomycetales	f__Streptomycetaceae	g__Streptomyces	s__thermoatroviridis
seq978	53	6	0	6	0	0	0	0	0	61	0	0	k__Archaea	p__Crenarchaeota	c__Thaumarchaeota	o__Nitrososphaerales	f__Nitrososphaeraceae	g__Candidatus Nitrososphaera	s__SCA1145
seq979	58	34	34	0	0	0	0	0	0	0	0	0	k__Bacteria	p__Bacteroidetes	c__Cytophagia	o__Cytophagales	f__Cytophagaceae
seq980	50	17	0	0	59	0	0	0	0	0	0	0	k__Bacteria	p__Actinobacteria	c__Actinobacteria	o__Actinomycetales	f__Micromonosporaceae	g__	s__
seq981	16	0	110	0	0	0	0	0	0	0	0	0	k__Bacteria	p__Actinobacteria	c__Thermoleophilia	o__Solirubrobacterales	f__Solirubrobacteraceae	g__	s__
seq982	0	71	36	0	0	0	0	0	0	0	19	0	k__Bacteria	p__Proteobacteria	c__Betaproteobacteria	o__Burkholderiales	f__Oxalobacteraceae	g__	s__
seq983	0	0	0	0	126	0	0	0	0	0	0	0	k__Bacteria	p__Firmicutes	c__Bacilli	o__Turicibacterales	f__Turicibacteraceae	g__Turicibacter	s__
seq984	0	0	0	0	126	0	0	0	0	0	0	0	k__Bacteria	p__Firmicutes	c__Bacilli	o__Bacillales	f__Bacillaceae	g__Bacillus	s__
seq985	49	61	15	0	0	0	0	0	0	0	0	0	k__Bacteria	p__Proteobacteria	c__Betaproteobacteria	o__Burkholderiales	f__Oxalobacteraceae
seq986	38	0	8	11	42	14	0	0	0	0	0	12	k__Bacteria	p__Actinobacteria	c__Actinobacteria	o__Actinomycetales	f__Micromonosporaceae
seq987	31	34	15	0	20	25	0	0	0	0	0	0	k__Bacteria	p__Proteobacteria	c__Alphaproteobacteria	o__Rhodospirillales	f__Rhodospirillaceae	g__Azospirillum	s__
seq988	33	0	92	0	0	0	0	0	0	0	0	0	k__Bacteria	p__Actinobacteria	c__Thermoleophilia	o__Solirubrobacterales	f__	g__	s__
seq989	0	125	0	0	0	0	0	0	0	0	0	0	k__Bacteria	p__Actinobacteria	c__Actinobacteria	o__Actinomycetales	f__Nocardiaceae	g__Nocardia	s__
seq990	0	9	0	14	0	0	17	20	5	23	13	24	k__Bacteria	p__Firmicutes	c__Bacilli	o__Bacillales	f__Paenibacillaceae	g__Paenibacillus	s__
seq991	0	0	0	0	0	125	0	0	0	0	0	0	k__Bacteria	p__Firmicutes	c__Bacilli	o__Bacillales	f__Paenibacillaceae	g__	s__
seq992	9	0	88	17	0	10	0	0	0	0	0	0	k__Bacteria	p__Firmicutes	c__Bacilli	o__Bacillales	f__Paenibacillaceae	g__	s__
seq993	0	11	0	16	0	0	26	48	23	0	0	0	k__Bacteria	p__Proteobacteria	c__Alphaproteobacteria	o__Rhodobacterales	f__Rhodobacteraceae
seq994	0	0	0	27	0	0	0	0	47	0	50	0	k__Bacteria	p__Proteobacteria	c__Gammaproteobacteria	o__Enterobacteriales	f__Enterobacteriaceae	g__Klebsiella	s__
seq995	0	0	0	4	0	0	0	0	0	120	0	0	k__Bacteria	p__Actinobacteria	c__Actinobacteria	o__Actinomycetales	f__Pseudonocardiaceae	g__	s__
seq996	0	0	0	0	0	0	0	0	73	35	16	0	k__Bacteria	p__Actinobacteria	c__Actinobacteria	o__Actinomycetales
seq997	108	0	15	0	0	0	0	0	0	0	0	0	k__Bacteria	p__Chloroflexi	c__Thermomicrobia	o__JG30-KF-CM45	f__	g__	s__
seq998	39	0	0	0	31	53	0	0	0	0	0	0	k__Bacteria	p__Proteobacteria	c__Betaproteobacteria	o__Burkholderiales	f__Oxalobacteraceae	g__Ralstonia	s__
seq999	36	0	74	0	0	13	0	0	0	0	0	0	k__Bacteria	p__Proteobacteria	c__Alphaproteobacteria	o__Rhodospirillales	f__Acetobacteraceae	g__	s__
seq1000	17	0	94	0	0	12	0	0	0	0	0	0	k__Bacteria	p__Acidobacteria	c__iii1-8	o__DS-18	f__	g__	s__
seq1001	0	43	38	0	15	27	0	0	0	0	0	0	k__Bacteria	p__Proteobacteria	c__Betaproteobacteria	o__Burkholderiales
seq1002	0	26	0	20	0	0	20	38	19	0	0	0	k__Bacteria	p__Proteobacteria	c__Betaproteobacteria	o__Rhodocyclales	f__Rhodocyclaceae	g__Dechloromonas	s__
seq1003	0	0	0	30	43	44	0	0	0	0	0	6	k__Bacteria	p__Bacteroidetes	c__[Saprospirae]	o__[Saprospirales]	f__Chitinophagaceae	g__Flavisolibacter	s__
seq1004	0	0	0	24	0	0	31	34	23	0	11	0	k__Bacteria	p__Proteobacteria	c__Gammaproteobacteria	o__Pseudomonadales	f__Pseudomonadaceae	g__Pseudomonas	s__
seq1005	66	26	0	0	30	0	0	0	0	0	0	0	k__Bacteria	p__Proteobacteria	c__Alphaproteobacteria	o__Rhizobiales	f__Bradyrhizobiaceae	g__	s__
seq1006	0	0	0	23	18	11	0	0	0	0	57	13	k__Bacteria	p__Firmicutes	c__Bacilli	o__Bacillales	f__Paenibacillaceae	g__Paenibacillus
seq1007	0	0	0	0	0	0	47	37	0	38	0	0	k__Bacteria	p__Firmicutes	c__Bacilli	o__Bacillales	f__Paenibacillaceae	g__Ammoniphilus	s__
seq1008	0	0	0	0	0	0	0	68	0	54	0	0	k__Bacteria	p__Proteobacteria	c__Gammaproteobacteria	o__Alteromonadales	f__Colwelliaceae	g__Thalassomonas	s__
seq1009	0	0	0	0	0	0	0	0	0	0	122	0	k__Bacteria	p__Firmicutes	c__Bacilli	o__Bacillales	f__Bacillaceae	g__Bacillus	s__endophyticus
seq1010	112	0	9	0	0	0	0	0	0	0	0	0	k__Bacteria	p__Gemmatimonadetes	c__Gemm-3	o__	f__	g__	s__
seq1011	17	40	11	15	38	0	0	0	0	0	0	0	k__Bacteria	p__Proteobacteria	c__Alphaproteobacteria	o__Sphingomonadales	f__Sphingomonadaceae
seq1012	48	0	0	32	29	0	0	0	0	0	12	0	k__Bacteria	p__Bacteroidetes	c__Cytophagia	o__Cytophagales	f__Cytophagaceae	g__Rhodocytophaga	s__
seq1013	0	39	0	0	0	0	0	5	0	49	28	0	k__Bacteria	p__Proteobacteria	c__Gammaproteobacteria	o__Enterobacteriales	f__Enterobacteriaceae	g__Enterobacter
seq1014	0	15	106	0	0	0	0	0	0	0	0	0	k__Bacteria	p__Actinobacteria	c__Thermoleophilia	o__Solirubrobacterales	f__	g__	s__
seq1015	0	10	0	0	0	7	0	0	0	78	0	26	k__Bacteria	p__Firmicutes	c__Bacilli	o__Bacillales	f__Bacillaceae	g__Bacillus	s__
seq1016	120	0	0	0	0	0	0	0	0	0	0	0	k__Archaea	p__Crenarchaeota	c__Thaumarchaeota	o__Nitrososphaerales	f__Nitrososphaeraceae	g__Candidatus Nitrososphaera	s__gargensis
seq1017	120	0	0	0	0	0	0	0	0	0	0	0	k__Bacteria	p__Actinobacteria	c__Acidimicrobiia	o__Acidimicrobiales	f__	g__	s__
seq1018	66	0	50	0	0	4	0	0	0	0	0	0	k__Bacteria	p__Chloroflexi	c__Chloroflexi	o__Herpetosiphonales	f__	g__	s__
seq1019	19	70	0	0	0	0	12	19	0	0	0	0	k__Bacteria	p__Proteobacteria	c__Betaproteobacteria	o__Burkholderiales	f__Comamonadaceae	g__Diaphorobacter	s__
seq1020	38	53	29	0	0	0	0	0	0	0	0	0	k__Bacteria	p__Bacteroidetes	c__[Saprospirae]	o__[Saprospirales]	f__Chitinophagaceae	g__Flavisolibacter	s__
seq1021	17	0	100	0	0	3	0	0	0	0	0	0	k__Bacteria	p__Actinobacteria	c__Rubrobacteria	o__Rubrobacterales	f__Rubrobacteraceae	g__Rubrobacter	s__
seq1022	29	0	91	0	0	0	0	0	0	0	0	0	k__Bacteria	p__Actinobacteria	c__Acidimicrobiia	o__Acidimicrobiales	f__	g__	s__
seq1023	5	14	0	0	8	0	0	12	0	75	6	0	k__Bacteria	p__Chloroflexi	c__Thermomicrobia	o__JG30-KF-CM45	f__	g__	s__
seq1024	0	23	0	13	0	0	16	18	12	24	10	4	k__Bacteria	p__Firmicutes	c__Clostridia	o__Clostridiales	f__Ruminococcaceae	g__Oscillospira	s__
seq1025	0	101	19	0	0	0	0	0	0	0	0	0	k__Bacteria	p__Actinobacteria	c__Actinobacteria	o__Actinomycetales	f__Sporichthyaceae	g__	s__
seq1026	0	31	0	61	28	0	0	0	0	0	0	0	k__Bacteria	p__Proteobacteria	c__Betaproteobacteria	o__Burkholderiales	f__Oxalobacteraceae
seq1027	0	0	0	0	0	0	44	34	0	42	0	0	k__Bacteria	p__Acidobacteria	c__Acidobacteriia	o__Acidobacteriales	f__Koribacteraceae	g__	s__
seq1028	0	29	0	6	0	0	19	22	6	16	12	9	k__Bacteria	p__Proteobacteria	c__Betaproteobacteria	o__Burkholderiales	f__Alcaligenaceae	g__	s__
seq1029	0	5	0	0	0	0	0	20	0	94	0	0	k__Bacteria	p__Actinobacteria	c__Actinobacteria	o__Actinomycetales	f__Propionibacteriaceae	g__	s__
seq1030	0	0	0	0	119	0	0	0	0	0	0	0	k__Bacteria	p__Bacteroidetes	c__Cytophagia	o__Cytophagales	f__Cytophagaceae	g__Dyadobacter	s__
seq1031	0	0	0	0	25	0	0	0	0	0	94	0	k__Bacteria	p__Firmicutes	c__Bacilli	o__Bacillales	f__Paenibacillaceae	g__	s__
seq1032	74	20	0	0	0	24	0	0	0	0	0	0	k__Bacteria	p__Chloroflexi	c__Ellin6529	o__	f__	g__	s__
seq1033	20	11	0	20	31	36	0	0	0	0	0	0	k__Bacteria	p__Proteobacteria	c__Alphaproteobacteria	o__Caulobacterales	f__Caulobacteraceae	g__	s__
seq1034	37	16	0	0	45	0	0	0	0	0	0	20	k__Bacteria	p__Firmicutes	c__Bacilli	o__Bacillales	f__Bacillaceae	g__Bacillus	s__
seq1035	0	46	14	23	35	0	0	0	0	0	0	0	k__Bacteria	p__Proteobacteria	c__Betaproteobacteria	o__Burkholderiales	f__Oxalobacteraceae
seq1036	78	0	32	0	7	0	0	0	0	0	0	0	k__Bacteria	p__Bacteroidetes	c__Cytophagia	o__Cytophagales	f__Cytophagaceae	g__Adhaeribacter	s__
seq1037	117	0	0	0	0	0	0	0	0	0	0	0	k__Bacteria	p__Actinobacteria	c__Rubrobacteria	o__Rubrobacterales	f__Rubrobacteraceae	g__Rubrobacter	s__
seq1038	58	0	45	14	0	0	0	0	0	0	0	0	k__Bacteria	p__Proteobacteria	c__Betaproteobacteria	o__Burkholderiales
seq1039	0	117	0	0	0	0	0	0	0	0	0	0	k__Bacteria	p__Proteobacteria	c__Alphaproteobacteria	o__Rhodobacterales	f__Rhodobacteraceae
seq1040	0	13	104	0	0	0	0	0	0	0	0	0	k__Bacteria	p__Bacteroidetes	c__[Saprospirae]	o__[Saprospirales]	f__Chitinophagaceae	g__Flavisolibacter	s__
seq1041	0	0	0	0	59	0	0	0	0	0	58	0	k__Bacteria	p__Firmicutes	c__Bacilli	o__Bacillales
seq1042	0	0	0	0	0	0	0	0	70	0	47	0	k__Bacteria	p__Chloroflexi	c__Anaerolineae	o__Caldilineales	f__Caldilineaceae	g__	s__
seq1043	0	0	0	0	0	0	0	0	0	117	0	0	k__Bacteria	p__Bacteroidetes	c__Sphingobacteriia	o__Sphingobacteriales	f__Sphingobacteriaceae	g__Parapedobacter	s__
seq1044	80	0	36	0	0	0	0	0	0	0	0	0	k__Bacteria	p__Actinobacteria	c__Thermoleophilia	o__Solirubrobacterales	f__	g__	s__
seq1045	62	0	0	30	0	0	0	0	0	0	24	0	k__Bacteria	p__Proteobacteria	c__Betaproteobacteria	o__Burkholderiales	f__Comamonadaceae	g__Ramlibacter	s__
seq1046	37	28	0	0	25	0	3	0	0	17	6	0	k__Bacteria	p__Actinobacteria	c__Acidimicrobiia	o__Acidimicrobiales
seq1047	0	0	0	7	0	0	0	0	59	0	50	0	k__Archaea	p__Crenarchaeota	c__Thaumarchaeota	o__Cenarchaeales	f__Cenarchaeaceae	g__Nitrosopumilus	s__
seq1048	103	12	0	0	0	0	0	0	0	0	0	0	k__Bacteria	p__Verrucomicrobia	c__[Pedosphaerae]	o__[Pedosphaerales]	f__Ellin517	g__	s__
seq1049	51	54	0	0	10	0	0	0	0	0	0	0	k__Bacteria	p__Cyanobacteria	c__ML635J-21	o__	f__	g__	s__
seq1050	42	32	41	0	0	0	0	0	0	0	0	0	k__Bacteria	p__Firmicutes	c__Bacilli	o__Bacillales	f__Paenibacillaceae	g__Ammoniphilus	s__
seq1051	0	97	18	0	0	0	0	0	0	0	0	0	k__Bacteria	p__Proteobacteria	c__Betaproteobacteria	o__Burkholderiales	f__Oxalobacteraceae	g__	s__
seq1052	0	60	10	13	29	0	0	0	0	0	0	3	k__Bacteria	p__Bacteroidetes	c__Cytophagia	o__Cytophagales	f__Cytophagaceae	g__Adhaeribacter	s__
seq1053	0	0	0	45	0	0	29	0	0	28	13	0	k__Bacteria	p__Actinobacteria	c__Actinobacteria	o__Actinomycetales	f__Streptomycetaceae	g__Streptomyces	s__
seq1054	0	0	0	0	115	0	0	0	0	0	0	0	k__Bacteria	p__Proteobacteria	c__Gammaproteobacteria	o__Enterobacteriales	f__Enterobacteriaceae	g__Citrobacter	s__
seq1055	104	0	10	0	0	0	0	0	0	0	0	0	k__Bacteria	p__Actinobacteria	c__MB-A2-108	o__0319-7L14	f__	g__	s__
seq1056	109	0	5	0	0	0	0	0	0	0	0	0	k__Bacteria	p__Actinobacteria	c__Thermoleophilia	o__Solirubrobacterales	f__	g__	s__
seq1057	67	27	20	0	0	0	0	0	0	0	0	0	k__Bacteria	p__Proteobacteria	c__Alphaproteobacteria	o__Rhizobiales	f__Bradyrhizobiaceae	g__	s__
seq1058	61	12	30	0	0	8	0	0	0	0	3	0	k__Bacteria	p__Gemmatimonadetes	c__Gemmatimonadetes	o__	f__	g__	s__
seq1059	43	47	12	0	0	6	0	0	0	0	6	0	k__Bacteria	p__Acidobacteria	c__[Chloracidobacteria]	o__RB41	f__Ellin6075	g__	s__
seq1060	13	10	10	8	43	12	0	0	0	0	9	9	k__Bacteria	p__Proteobacteria	c__Alphaproteobacteria	o__Rhodospirillales	f__Rhodospirillaceae
seq1061	17	61	13	13	10	0	0	0	0	0	0	0	k__Bacteria	p__Proteobacteria	c__Betaproteobacteria	o__Burkholderiales
seq1062	15	47	52	0	0	0	0	0	0	0	0	0	k__Bacteria	p__Proteobacteria	c__Betaproteobacteria	o__Burkholderiales
seq1063	16	15	20	29	20	0	0	0	0	5	9	0	k__Bacteria	p__Actinobacteria	c__Actinobacteria	o__Actinomycetales	f__Geodermatophilaceae
seq1064	4	0	0	0	0	0	0	0	0	13	86	11	k__Bacteria	p__Proteobacteria	c__Alphaproteobacteria	o__Rhizobiales	f__Rhizobiaceae	g__Agrobacterium	s__
seq1065	0	28	0	0	0	0	27	0	0	20	18	21	k__Bacteria	p__Firmicutes	c__Bacilli	o__Lactobacillales	f__Enterococcaceae	g__Enterococcus	s__
seq1066	0	11	0	0	0	0	0	17	0	77	4	5	k__Bacteria	p__Proteobacteria	c__Alphaproteobacteria	o__Rhizobiales	f__Methylocystaceae	g__	s__
seq1067	0	0	0	11	78	25	0	0	0	0	0	0	k__Bacteria	p__Firmicutes	c__Bacilli	o__Bacillales	f__Bacillaceae	g__Bacillus	s__
seq1068	0	0	0	0	0	114	0	0	0	0	0	0	k__Bacteria	p__Firmicutes	c__Bacilli	o__Bacillales	f__Bacillaceae	g__Bacillus	s__
seq1069	0	0	0	0	0	0	27	59	28	0	0	0	k__Bacteria	p__Actinobacteria	c__Actinobacteria	o__Actinomycetales	f__Micromonosporaceae
seq1070	61	7	41	0	0	4	0	0	0	0	0	0	k__Bacteria
seq1071	47	28	23	0	7	8	0	0	0	0	0	0	k__Bacteria	p__Bacteroidetes	c__[Rhodothermi]	o__[Rhodothermales]	f__Rhodothermaceae	g__	s__
seq1072	28	19	10	0	16	7	0	0	0	0	8	25	k__Bacteria	p__Proteobacteria	c__Alphaproteobacteria	o__Rhodospirillales	f__Acetobacteraceae	g__	s__
seq1073	33	62	18	0	0	0	0	0	0	0	0	0	k__Archaea	p__Euryarchaeota	c__Thermoplasmata	o__E2	f__	g__	s__
seq1074	35	0	0	41	0	37	0	0	0	0	0	0	k__Bacteria	p__Proteobacteria	c__Betaproteobacteria	o__Burkholderiales	f__Comamonadaceae
seq1075	0	17	0	0	0	0	35	49	12	0	0	0	k__Bacteria	p__Proteobacteria	c__Gammaproteobacteria	o__Alteromonadales	f__125ds10	g__	s__
seq1076	0	19	0	14	0	0	26	39	15	0	0	0	k__Bacteria	p__Actinobacteria	c__Actinobacteria	o__Actinomycetales	f__Microbacteriaceae	g__Clavibacter	s__
seq1077	0	113	0	0	0	0	0	0	0	0	0	0	k__Bacteria	p__Actinobacteria	c__Actinobacteria	o__Actinomycetales	f__Nocardioidaceae	g__	s__
seq1078	0	0	0	0	16	0	0	0	8	5	70	14	k__Bacteria	p__Firmicutes	c__Bacilli	o__Bacillales	f__Paenibacillaceae	g__Paenibacillus
seq1079	112	0	0	0	0	0	0	0	0	0	0	0	k__Bacteria	p__Actinobacteria	c__Acidimicrobiia	o__Acidimicrobiales	f__	g__	s__
seq1080	86	0	26	0	0	0	0	0	0	0	0	0	k__Bacteria	p__Actinobacteria	c__Actinobacteria	o__Actinomycetales	f__Micrococcaceae	g__Microbispora	s__rosea
seq1081	39	0	73	0	0	0	0	0	0	0	0	0	k__Bacteria	p__Actinobacteria	c__Thermoleophilia	o__Gaiellales	f__Gaiellaceae	g__	s__
seq1082	57	0	0	0	0	55	0	0	0	0	0	0	k__Bacteria	p__Gemmatimonadetes	c__Gemm-3	o__	f__	g__	s__
seq1083	9	59	0	0	0	0	0	0	0	0	44	0	k__Bacteria	p__Proteobacteria	c__Betaproteobacteria	o__Burkholderiales	f__Oxalobacteraceae
seq1084	0	35	0	0	0	0	0	0	0	30	21	26	k__Bacteria	p__Proteobacteria	c__Gammaproteobacteria	o__Enterobacteriales	f__Enterobacteriaceae
seq1085	0	12	72	0	14	14	0	0	0	0	0	0	k__Bacteria	p__Actinobacteria	c__Thermoleophilia	o__Gaiellales	f__Gaiellaceae	g__	s__
seq1086	0	0	0	42	59	11	0	0	0	0	0	0	k__Bacteria	p__Bacteroidetes	c__Cytophagia	o__Cytophagales
seq1087	0	0	0	0	0	47	0	0	0	0	18	47	k__Bacteria	p__Proteobacteria	c__Betaproteobacteria	o__Burkholderiales	f__Oxalobacteraceae	g__	s__
seq1088	20	50	13	0	9	7	0	0	0	12	0	0	k__Bacteria	p__Actinobacteria	c__Thermoleophilia	o__Solirubrobacterales
seq1089	66	45	0	0	0	0	0	0	0	0	0	0	k__Bacteria	p__Actinobacteria	c__Thermoleophilia	o__Solirubrobacterales
seq1090	5	12	88	0	0	0	0	0	0	0	6	0	k__Bacteria	p__Proteobacteria	c__Betaproteobacteria	o__Burkholderiales
seq1091	0	78	33	0	0	0	0	0	0	0	0	0	k__Bacteria	p__Actinobacteria	c__Actinobacteria	o__Actinomycetales	f__Sporichthyaceae	g__	s__
seq1092	0	9	0	0	0	0	0	0	51	0	51	0	k__Bacteria	p__Proteobacteria	c__Gammaproteobacteria	o__Alteromonadales	f__OM60	g__	s__
seq1093	0	0	0	0	0	0	6	0	76	0	29	0	k__Archaea	p__Crenarchaeota	c__Thaumarchaeota	o__Cenarchaeales	f__Cenarchaeaceae	g__Nitrosopumilus	s__
seq1094	0	0	0	0	0	0	0	0	0	0	20	91	k__Bacteria	p__Firmicutes	c__Bacilli	o__Bacillales	f__Bacillaceae	g__Bacillus	s__
seq1095	28	0	82	0	0	0	0	0	0	0	0	0	k__Bacteria	p__Proteobacteria	c__Betaproteobacteria	o__Burkholderiales	f__Oxalobacteraceae
seq1096	14	0	85	0	0	11	0	0	0	0	0	0	k__Bacteria	p__Actinobacteria	c__Acidimicrobiia	o__Acidimicrobiales	f__EB1017	g__	s__
seq1097	5	70	12	9	0	0	0	0	0	0	6	8	k__Bacteria	p__Proteobacteria	c__Alphaproteobacteria	o__Rhizobiales	f__Methylobacteriaceae	g__	s__
seq1098	0	5	0	0	0	0	0	0	0	62	0	43	k__Bacteria	p__Firmicutes	c__Bacilli	o__Bacillales	f__Bacillaceae	g__Bacillus	s__endophyticus
seq1099	0	0	0	0	24	27	0	0	10	0	31	18	k__Bacteria	p__Bacteroidetes	c__Sphingobacteriia	o__Sphingobacteriales	f__Sphingobacteriaceae	g__	s__
seq1100	88	0	10	0	0	11	0	0	0	0	0	0	k__Bacteria	p__Gemmatimonadetes	c__Gemmatimonadetes	o__C114	f__	g__	s__
seq1101	31	34	7	0	18	19	0	0	0	0	0	0	k__Bacteria	p__Gemmatimonadetes	c__Gemmatimonadetes	o__Gemmatimonadales	f__	g__	s__
seq1102	23	52	22	12	0	0	0	0	0	0	0	0	k__Bacteria	p__Bacteroidetes	c__[Saprospirae]	o__[Saprospirales]	f__Chitinophagaceae	g__Flavisolibacter	s__
seq1103	36	73	0	0	0	0	0	0	0	0	0	0	k__Bacteria	p__Actinobacteria	c__Actinobacteria	o__Actinomycetales	f__Geodermatophilaceae	g__	s__
seq1104	30	0	79	0	0	0	0	0	0	0	0	0	k__Archaea	p__Euryarchaeota	c__Thermoplasmata	o__E2	f__	g__	s__
seq1105	0	23	86	0	0	0	0	0	0	0	0	0	k__Bacteria	p__Verrucomicrobia	c__[Pedosphaerae]	o__[Pedosphaerales]
seq1106	0	32	30	0	13	21	0	0	0	0	13	0	k__Bacteria	p__Proteobacteria	c__Deltaproteobacteria	o__Myxococcales
seq1107	0	17	0	17	23	0	16	28	8	0	0	0	k__Bacteria	p__Proteobacteria	c__Deltaproteobacteria	o__Desulfovibrionales	f__Desulfomicrobiaceae	g__Desulfomicrobium	s__
seq1108	0	0	0	57	0	0	0	0	0	0	0	52	k__Bacteria	p__Proteobacteria	c__Alphaproteobacteria	o__Kordiimonadales	f__Kordiimonadaceae	g__	s__
seq1109	0	0	0	0	0	0	0	15	0	59	19	16	k__Bacteria	p__Proteobacteria	c__Alphaproteobacteria	o__Rhizobiales	f__Phyllobacteriaceae	g__Mesorhizobium	s__
seq1110	106	0	2	0	0	0	0	0	0	0	0	0	k__Bacteria	p__TM7	c__TM7-1	o__	f__	g__	s__
seq1111	85	0	13	0	0	10	0	0	0	0	0	0	k__Bacteria	p__Chloroflexi	c__Thermomicrobia	o__AKYG1722	f__	g__	s__
seq1112	108	0	0	0	0	0	0	0	0	0	0	0	k__Archaea	p__Euryarchaeota	c__Thermoplasmata	o__E2	f__	g__	s__
seq1113	45	0	0	0	11	16	0	0	0	0	0	36	k__Bacteria	p__Actinobacteria	c__Actinobacteria	o__Actinomycetales	f__Micromonosporaceae	g__	s__
seq1114	29	51	20	0	0	0	0	0	0	0	8	0	k__Bacteria	p__Proteobacteria	c__Betaproteobacteria	o__Burkholderiales	f__Oxalobacteraceae	g__	s__
seq1115	6	0	6	12	0	0	0	0	0	0	0	84	k__Bacteria	p__Firmicutes	c__Bacilli	o__Bacillales	f__Paenibacillaceae	g__Brevibacillus	s__
seq1116	0	0	108	0	0	0	0	0	0	0	0	0	k__Bacteria	p__Chloroflexi	c__Chloroflexi	o__[Roseiflexales]
seq1117	0	0	0	36	0	72	0	0	0	0	0	0	k__Bacteria	p__Firmicutes	c__Bacilli	o__Bacillales	f__Bacillaceae	g__Bacillus	s__badius
seq1118	0	0	0	0	108	0	0	0	0	0	0	0	k__Bacteria	p__Bacteroidetes	c__Bacteroidia	o__Bacteroidales
seq1119	0	0	0	0	0	0	53	39	0	16	0	0	k__Bacteria	p__Proteobacteria	c__Alphaproteobacteria	o__Rhizobiales	f__Hyphomicrobiaceae	g__Rhodoplanes	s__
seq1120	0	0	0	0	0	0	44	39	0	25	0	0	k__Bacteria	p__Gemmatimonadetes	c__Gemm-1	o__	f__	g__	s__
seq1121	0	0	0	0	0	0	59	49	0	0	0	0	k__Bacteria	p__Actinobacteria	c__Actinobacteria	o__Actinomycetales	f__Mycobacteriaceae	g__Mycobacterium	s__
seq1122	91	16	0	0	0	0	0	0	0	0	0	0	k__Bacteria	p__Proteobacteria	c__Alphaproteobacteria	o__Rhodobacterales	f__Rhodobacteraceae	g__Rubellimicrobium	s__
seq1123	43	30	25	9	0	0	0	0	0	0	0	0	k__Bacteria	p__Actinobacteria	c__Thermoleophilia	o__Solirubrobacterales	f__Conexibacteraceae	g__	s__
seq1124	0	15	0	11	0	0	28	34	19	0	0	0	k__Bacteria	p__Chloroflexi	c__Anaerolineae	o__Anaerolineales	f__Anaerolinaceae	g__Longilinea	s__
seq1125	0	54	0	0	53	0	0	0	0	0	0	0	k__Bacteria	p__Proteobacteria	c__Deltaproteobacteria	o__Myxococcales
seq1126	0	15	0	9	0	0	27	36	20	0	0	0	k__Bacteria	p__Proteobacteria	c__Deltaproteobacteria	o__Syntrophobacterales	f__Syntrophaceae	g__Syntrophus	s__
seq1127	0	0	0	20	0	0	33	31	23	0	0	0	k__Bacteria	p__Proteobacteria	c__Alphaproteobacteria	o__Rhodobacterales	f__Rhodobacteraceae	g__Rhodobacter	s__
seq1128	0	0	0	34	0	0	0	0	0	37	36	0	k__Bacteria	p__Actinobacteria	c__Actinobacteria	o__Actinomycetales	f__Nocardioidaceae	g__	s__
seq1129	63	0	24	19	0	0	0	0	0	0	0	0	k__Bacteria	p__Proteobacteria	c__Alphaproteobacteria	o__Sphingomonadales	f__Sphingomonadaceae	g__Sphingomonas	s__
seq1130	58	0	33	0	0	15	0	0	0	0	0	0	k__Bacteria	p__Proteobacteria	c__Betaproteobacteria
seq1131	41	33	11	9	0	12	0	0	0	0	0	0	k__Bacteria	p__Proteobacteria	c__Alphaproteobacteria	o__Sphingomonadales	f__Erythrobacteraceae	g__	s__
seq1132	13	0	93	0	0	0	0	0	0	0	0	0	k__Bacteria	p__Actinobacteria
seq1133	9	0	90	0	0	7	0	0	0	0	0	0	k__Bacteria	p__Actinobacteria	c__MB-A2-108	o__0319-7L14	f__	g__	s__
seq1134	34	0	72	0	0	0	0	0	0	0	0	0	k__Bacteria	p__Proteobacteria	c__Betaproteobacteria	o__Burkholderiales	f__Comamonadaceae
seq1135	15	63	28	0	0	0	0	0	0	0	0	0	k__Bacteria	p__Proteobacteria	c__Betaproteobacteria	o__Burkholderiales	f__Oxalobacteraceae
seq1136	0	52	0	26	0	0	0	0	0	0	0	28	k__Bacteria	p__Proteobacteria	c__Betaproteobacteria	o__Burkholderiales	f__Oxalobacteraceae
seq1137	0	0	106	0	0	0	0	0	0	0	0	0	k__Bacteria	p__Verrucomicrobia	c__[Pedosphaerae]	o__[Pedosphaerales]
seq1138	0	0	0	3	0	0	0	0	40	0	56	7	k__Bacteria	p__Proteobacteria	c__Alphaproteobacteria	o__Rhizobiales	f__Beijerinckiaceae	g__	s__
seq1139	0	0	0	0	8	93	0	0	0	0	0	5	k__Bacteria	p__Firmicutes	c__Bacilli	o__Bacillales	f__Paenibacillaceae	g__	s__
seq1140	0	0	0	0	0	0	26	40	0	40	0	0	k__Bacteria	p__Firmicutes	c__Bacilli	o__Bacillales	f__Bacillaceae	g__Bacillus	s__flexus
seq1141	33	9	10	0	21	21	0	0	0	0	0	11	k__Bacteria	p__Firmicutes	c__Bacilli	o__Bacillales	f__Planococcaceae	g__Solibacillus	s__
seq1142	105	0	0	0	0	0	0	0	0	0	0	0	k__Bacteria	p__Proteobacteria	c__Deltaproteobacteria	o__Syntrophobacterales	f__Syntrophobacteraceae	g__	s__
seq1143	0	61	26	4	5	6	0	0	0	0	3	0	k__Bacteria	p__Proteobacteria	c__Betaproteobacteria	o__Burkholderiales	f__Burkholderiaceae	g__	s__
seq1144	0	28	77	0	0	0	0	0	0	0	0	0	k__Bacteria	p__Verrucomicrobia	c__[Pedosphaerae]	o__[Pedosphaerales]	f__Ellin517	g__	s__
seq1145	0	18	0	16	0	0	25	12	11	15	0	8	k__Bacteria	p__Proteobacteria	c__Alphaproteobacteria	o__Rhizobiales	f__Rhizobiaceae	g__Agrobacterium	s__
seq1146	0	0	0	105	0	0	0	0	0	0	0	0	k__Bacteria	p__Firmicutes	c__Bacilli	o__Bacillales
seq1147	0	0	0	0	8	0	18	0	0	0	12	67	k__Bacteria	p__Firmicutes	c__Bacilli	o__Bacillales	f__Bacillaceae	g__Bacillus	s__flexus
seq1148	36	49	16	0	0	0	0	0	0	0	3	0	k__Bacteria	p__Acidobacteria	c__[Chloracidobacteria]	o__RB41
seq1149	25	0	34	0	45	0	0	0	0	0	0	0	k__Bacteria	p__Proteobacteria	c__Alphaproteobacteria	o__Caulobacterales	f__Caulobacteraceae	g__Phenylobacterium	s__
seq1150	0	74	0	0	0	0	0	0	0	30	0	0	k__Bacteria	p__Gemmatimonadetes	c__Gemm-3	o__	f__	g__	s__
seq1151	0	12	0	10	14	0	0	0	0	0	0	68	k__Bacteria	p__Actinobacteria	c__Actinobacteria	o__Actinomycetales	f__Streptosporangiaceae
seq1152	0	5	90	0	0	9	0	0	0	0	0	0	k__Bacteria	p__Proteobacteria	c__Betaproteobacteria	o__Burkholderiales	f__Comamonadaceae
seq1153	0	0	104	0	0	0	0	0	0	0	0	0	k__Bacteria	p__Firmicutes	c__Bacilli	o__Bacillales	f__Paenibacillaceae	g__	s__
seq1154	0	0	0	82	22	0	0	0	0	0	0	0	k__Bacteria	p__Firmicutes	c__Bacilli	o__Bacillales	f__Planococcaceae	g__Planomicrobium	s__
seq1155	0	0	0	0	21	0	0	19	0	45	19	0	k__Bacteria	p__Actinobacteria	c__Actinobacteria	o__Actinomycetales	f__Streptosporangiaceae	g__Nonomuraea	s__
seq1156	103	0	0	0	0	0	0	0	0	0	0	0	k__Bacteria	p__Proteobacteria	c__Betaproteobacteria	o__	f__	g__	s__
seq1157	65	0	23	0	11	0	0	0	0	0	4	0	k__Bacteria	p__Bacteroidetes	c__[Saprospirae]	o__[Saprospirales]	f__Chitinophagaceae
seq1158	38	31	13	12	9	0	0	0	0	0	0	0	k__Bacteria	p__Gemmatimonadetes	c__Gemmatimonadetes	o__	f__	g__	s__
seq1159	6	0	0	8	0	0	0	7	4	62	16	0	k__Bacteria	p__Actinobacteria	c__Actinobacteria	o__Actinomycetales	f__Nocardioidaceae	g__Actinopolymorpha	s__
seq1160	19	47	22	3	7	0	0	0	0	5	0	0	k__Bacteria	p__Proteobacteria	c__Betaproteobacteria	o__Burkholderiales	f__Comamonadaceae
seq1161	23	0	0	0	14	0	0	0	0	14	20	32	k__Bacteria	p__Proteobacteria	c__Alphaproteobacteria	o__Rhodospirillales	f__Acetobacteraceae	g__	s__
seq1162	4	0	0	0	0	12	0	0	0	15	13	59	k__Bacteria	p__Actinobacteria	c__Actinobacteria	o__Actinomycetales	f__Nocardiopsaceae	g__	s__
seq1163	0	37	0	0	0	0	0	0	0	29	21	16	k__Bacteria	p__Proteobacteria	c__Alphaproteobacteria	o__Rhodospirillales	f__Acetobacteraceae
seq1164	0	14	0	0	0	0	0	0	0	0	47	42	k__Bacteria	p__Proteobacteria	c__Alphaproteobacteria	o__Rhodospirillales	f__Rhodospirillaceae
seq1165	0	0	0	0	0	0	51	31	0	21	0	0	k__Bacteria	p__Proteobacteria	c__Deltaproteobacteria	o__Myxococcales	f__Myxococcaceae	g__Anaeromyxobacter	s__
seq1166	0	0	0	0	0	0	28	35	0	40	0	0	k__Bacteria	p__Actinobacteria	c__Thermoleophilia	o__Gaiellales	f__Gaiellaceae	g__	s__
seq1167	102	0	0	0	0	0	0	0	0	0	0	0	k__Archaea	p__Crenarchaeota	c__Thaumarchaeota	o__Nitrososphaerales	f__Nitrososphaeraceae	g__Candidatus Nitrososphaera	s__
seq1168	88	0	14	0	0	0	0	0	0	0	0	0	k__Bacteria	p__Actinobacteria	c__Rubrobacteria	o__Rubrobacterales	f__Rubrobacteraceae	g__Rubrobacter	s__
seq1169	12	7	3	5	25	7	0	0	0	0	31	12	k__Bacteria	p__Bacteroidetes	c__Cytophagia	o__Cytophagales	f__Cytophagaceae	g__	s__
seq1170	20	37	19	0	17	0	0	0	0	0	9	0	k__Bacteria	p__Actinobacteria	c__Actinobacteria	o__Actinomycetales	f__Geodermatophilaceae
seq1171	16	22	52	0	0	12	0	0	0	0	0	0	k__Bacteria	p__Actinobacteria	c__Acidimicrobiia	o__Acidimicrobiales	f__C111	g__	s__
seq1172	0	0	102	0	0	0	0	0	0	0	0	0	k__Bacteria	p__Gemmatimonadetes	c__Gemm-3	o__	f__	g__	s__
seq1173	0	0	0	0	0	0	58	0	0	44	0	0	k__Bacteria	p__Actinobacteria	c__Thermoleophilia	o__Gaiellales	f__Gaiellaceae	g__	s__
seq1174	0	0	0	0	0	0	0	0	0	87	15	0	k__Bacteria	p__Actinobacteria	c__Actinobacteria	o__Actinomycetales	f__Mycobacteriaceae	g__Mycobacterium	s__
seq1175	79	0	15	0	0	7	0	0	0	0	0	0	k__Bacteria	p__Acidobacteria	c__iii1-8	o__DS-18	f__	g__	s__
seq1176	32	47	0	9	7	0	0	0	0	6	0	0	k__Bacteria	p__Proteobacteria	c__Alphaproteobacteria	o__Rhodospirillales	f__Acetobacteraceae	g__	s__
seq1177	67	21	13	0	0	0	0	0	0	0	0	0	k__Bacteria	p__Actinobacteria	c__Acidimicrobiia	o__Acidimicrobiales	f__	g__	s__
seq1178	31	48	0	0	15	7	0	0	0	0	0	0	k__Bacteria	p__Actinobacteria	c__Actinobacteria	o__Actinomycetales	f__Microbacteriaceae	g__	s__
seq1179	42	26	14	0	0	0	0	0	0	0	11	8	k__Bacteria	p__Chloroflexi	c__Thermomicrobia	o__JG30-KF-CM45	f__	g__	s__
seq1180	34	0	0	0	47	0	0	0	0	0	20	0	k__Bacteria	p__Actinobacteria	c__Actinobacteria	o__Actinomycetales	f__Geodermatophilaceae
seq1181	0	0	101	0	0	0	0	0	0	0	0	0	k__Bacteria	p__Gemmatimonadetes	c__Gemm-3	o__	f__	g__	s__
seq1182	100	0	0	0	0	0	0	0	0	0	0	0	k__Bacteria	p__Actinobacteria	c__Thermoleophilia	o__Gaiellales	f__Gaiellaceae	g__	s__
seq1183	87	0	7	0	0	6	0	0	0	0	0	0	k__Bacteria	p__Gemmatimonadetes	c__Gemmatimonadetes	o__	f__	g__	s__
seq1184	43	0	57	0	0	0	0	0	0	0	0	0	k__Bacteria	p__Actinobacteria	c__Thermoleophilia	o__Solirubrobacterales	f__	g__	s__
seq1185	100	0	0	0	0	0	0	0	0	0	0	0	k__Bacteria	p__Actinobacteria	c__Acidimicrobiia	o__Acidimicrobiales	f__	g__	s__
seq1186	0	27	0	0	5	13	10	0	0	20	13	12	k__Bacteria	p__Actinobacteria	c__Actinobacteria	o__Actinomycetales	f__Corynebacteriaceae	g__Corynebacterium	s__
seq1187	0	20	0	0	0	0	0	0	0	0	0	80	k__Bacteria	p__Firmicutes	c__Bacilli	o__Bacillales	f__Bacillaceae
seq1188	0	0	0	8	0	20	0	0	0	0	0	72	k__Bacteria	p__Firmicutes	c__Bacilli	o__Bacillales	f__Paenibacillaceae	g__Paenibacillus	s__
seq1189	0	0	0	0	0	59	0	0	0	0	0	41	k__Bacteria	p__Firmicutes	c__Bacilli	o__Bacillales	f__Paenibacillaceae	g__	s__
seq1190	0	0	0	0	0	0	41	29	0	30	0	0	k__Bacteria	p__Actinobacteria	c__Thermoleophilia	o__Solirubrobacterales	f__	g__	s__
seq1191	99	0	0	0	0	0	0	0	0	0	0	0	k__Bacteria	p__Bacteroidetes	c__Cytophagia	o__Cytophagales	f__Cytophagaceae	g__Adhaeribacter	s__
seq1192	22	0	71	0	0	6	0	0	0	0	0	0	k__Bacteria	p__Proteobacteria	c__Deltaproteobacteria	o__Myxococcales
seq1193	36	0	63	0	0	0	0	0	0	0	0	0	k__Bacteria	p__Actinobacteria	c__Acidimicrobiia	o__Acidimicrobiales	f__	g__	s__
seq1194	0	77	22	0	0	0	0	0	0	0	0	0	k__Bacteria	p__Verrucomicrobia	c__[Pedosphaerae]	o__[Pedosphaerales]
seq1195	0	5	0	0	0	0	0	10	0	84	0	0	k__Bacteria	p__Chloroflexi	c__Thermomicrobia	o__AKYG1722	f__	g__	s__
seq1196	69	29	0	0	0	0	0	0	0	0	0	0	k__Bacteria	p__Proteobacteria	c__Betaproteobacteria	o__Burkholderiales	f__Comamonadaceae	g__Comamonas	s__
seq1197	83	3	8	0	0	4	0	0	0	0	0	0	k__Bacteria	p__Actinobacteria	c__MB-A2-108	o__0319-7L14	f__	g__	s__
seq1198	35	52	11	0	0	0	0	0	0	0	0	0	k__Bacteria	p__Chloroflexi	c__Chloroflexi	o__AKIW781	f__	g__	s__
seq1199	11	0	87	0	0	0	0	0	0	0	0	0	k__Bacteria	p__Actinobacteria	c__Thermoleophilia	o__Solirubrobacterales	f__	g__	s__
seq1200	53	45	0	0	0	0	0	0	0	0	0	0	k__Bacteria	p__Actinobacteria	c__Rubrobacteria	o__Rubrobacterales	f__Rubrobacteraceae	g__Rubrobacter	s__
seq1201	8	0	14	9	25	37	0	0	0	0	0	5	k__Bacteria	p__Bacteroidetes	c__[Saprospirae]	o__[Saprospirales]	f__Chitinophagaceae
seq1202	0	0	98	0	0	0	0	0	0	0	0	0	k__Bacteria	p__Actinobacteria	c__Thermoleophilia	o__Gaiellales	f__Gaiellaceae	g__	s__
seq1203	0	0	0	8	52	23	0	0	0	0	15	0	k__Bacteria	p__Firmicutes	c__Bacilli	o__Bacillales
seq1204	0	0	0	0	98	0	0	0	0	0	0	0	k__Bacteria	p__Firmicutes	c__Bacilli	o__Bacillales	f__Planococcaceae	g__Planomicrobium	s__
seq1205	0	0	0	0	0	0	35	42	0	21	0	0	k__Bacteria	p__Actinobacteria	c__Thermoleophilia	o__Gaiellales	f__Gaiellaceae	g__	s__
seq1206	66	26	0	0	0	5	0	0	0	0	0	0	k__Bacteria	p__Actinobacteria	c__MB-A2-108	o__0319-7L14	f__	g__	s__
seq1207	36	39	10	0	0	0	0	0	0	12	0	0	k__Bacteria	p__Actinobacteria	c__Actinobacteria	o__Actinomycetales	f__Nocardioidaceae	g__	s__
seq1208	70	0	27	0	0	0	0	0	0	0	0	0	k__Bacteria	p__Proteobacteria	c__Alphaproteobacteria	o__Rhodospirillales	f__Acetobacteraceae	g__	s__
seq1209	14	0	0	34	16	33	0	0	0	0	0	0	k__Bacteria	p__Actinobacteria	c__Actinobacteria	o__Actinomycetales	f__Microbacteriaceae	g__Microbacterium	s__
seq1210	16	0	81	0	0	0	0	0	0	0	0	0	k__Bacteria	p__Actinobacteria	c__MB-A2-108	o__0319-7L14	f__	g__	s__
seq1211	0	13	0	0	0	0	28	24	32	0	0	0	k__Bacteria	p__Proteobacteria	c__Gammaproteobacteria	o__HOC36	f__	g__	s__
seq1212	22	28	18	0	28	0	0	0	0	0	0	0	k__Bacteria	p__Actinobacteria	c__Actinobacteria	o__Actinomycetales	f__Sporichthyaceae	g__	s__
seq1213	8	11	44	0	15	18	0	0	0	0	0	0	k__Bacteria	p__Gemmatimonadetes	c__Gemm-3	o__	f__	g__	s__
seq1214	0	17	0	8	0	0	25	33	13	0	0	0	k__Bacteria	p__Proteobacteria	c__Deltaproteobacteria	o__Myxococcales	f__Myxococcaceae	g__Anaeromyxobacter	s__
seq1215	0	19	0	0	77	0	0	0	0	0	0	0	k__Bacteria	p__Firmicutes	c__Bacilli	o__Bacillales	f__Planococcaceae	g__Planomicrobium	s__
seq1216	0	0	96	0	0	0	0	0	0	0	0	0	k__Bacteria	p__Actinobacteria	c__Acidimicrobiia	o__Acidimicrobiales	f__	g__	s__
seq1217	0	0	0	47	49	0	0	0	0	0	0	0	k__Bacteria	p__Firmicutes	c__Bacilli	o__Bacillales	f__Bacillaceae	g__Bacillus	s__badius
seq1218	0	0	0	0	26	27	0	0	0	0	43	0	k__Bacteria	p__Proteobacteria	c__Alphaproteobacteria	o__Rhizobiales	f__Rhizobiaceae
seq1219	0	0	0	0	0	96	0	0	0	0	0	0	k__Bacteria	p__Firmicutes	c__Bacilli	o__Bacillales	f__Paenibacillaceae	g__	s__
seq1220	0	0	0	0	0	0	0	0	0	96	0	0	k__Bacteria	p__Actinobacteria	c__Actinobacteria	o__Actinomycetales
seq1221	68	17	10	0	0	0	0	0	0	0	0	0	k__Bacteria	p__Verrucomicrobia	c__[Pedosphaerae]	o__[Pedosphaerales]	f__Ellin517	g__	s__
seq1222	55	24	10	0	0	6	0	0	0	0	0	0	k__Bacteria	p__Proteobacteria	c__Alphaproteobacteria	o__Rhizobiales	f__Hyphomicrobiaceae
seq1223	62	0	33	0	0	0	0	0	0	0	0	0	k__Bacteria	p__Actinobacteria	c__Acidimicrobiia	o__Acidimicrobiales	f__	g__	s__
seq1224	39	32	0	24	0	0	0	0	0	0	0	0	k__Bacteria	p__Gemmatimonadetes	c__Gemm-3	o__	f__	g__	s__
seq1225	61	0	34	0	0	0	0	0	0	0	0	0	k__Bacteria	p__Actinobacteria	c__Actinobacteria	o__Actinomycetales	f__Sporichthyaceae	g__	s__
seq1226	36	59	0	0	0	0	0	0	0	0	0	0	k__Bacteria	p__Proteobacteria	c__Betaproteobacteria	o__Burkholderiales	f__Oxalobacteraceae
seq1227	7	28	24	12	0	16	0	0	0	8	0	0	k__Bacteria	p__Proteobacteria	c__Betaproteobacteria	o__Burkholderiales
seq1228	14	0	81	0	0	0	0	0	0	0	0	0	k__Bacteria	p__Actinobacteria	c__Thermoleophilia	o__Gaiellales	f__Gaiellaceae	g__	s__
seq1229	21	0	74	0	0	0	0	0	0	0	0	0	k__Bacteria	p__Bacteroidetes	c__Cytophagia	o__Cytophagales	f__Cytophagaceae	g__Adhaeribacter	s__
seq1230	0	95	0	0	0	0	0	0	0	0	0	0	k__Bacteria	p__Proteobacteria	c__Gammaproteobacteria	o__Pseudomonadales	f__Pseudomonadaceae
seq1231	0	48	47	0	0	0	0	0	0	0	0	0	k__Bacteria	p__Gemmatimonadetes	c__Gemm-3	o__	f__	g__	s__
seq1232	0	0	0	14	0	0	0	25	26	0	21	9	k__Bacteria	p__Proteobacteria	c__Gammaproteobacteria	o__Vibrionales	f__Pseudoalteromonadaceae	g__Pseudoalteromonas	s__
seq1233	0	0	0	26	55	14	0	0	0	0	0	0	k__Bacteria	p__Bacteroidetes	c__Cytophagia	o__Cytophagales	f__Cytophagaceae
seq1234	0	0	0	0	0	0	0	56	0	39	0	0	k__Bacteria	p__Proteobacteria	c__Gammaproteobacteria	o__Alteromonadales	f__Colwelliaceae	g__Thalassomonas	s__
seq1235	0	0	0	0	0	0	0	66	0	29	0	0	k__Bacteria	p__Actinobacteria	c__Actinobacteria	o__Actinomycetales	f__Micromonosporaceae	g__	s__
seq1236	0	0	0	0	0	0	0	0	0	95	0	0	k__Bacteria	p__Proteobacteria	c__Betaproteobacteria	o__Burkholderiales	f__Alcaligenaceae	g__	s__
seq1237	84	4	0	0	0	0	0	0	0	6	0	0	k__Bacteria	p__Actinobacteria	c__Actinobacteria	o__Actinomycetales	f__Propionibacteriaceae	g__Propionibacterium	s__acnes
seq1238	48	0	8	0	10	28	0	0	0	0	0	0	k__Bacteria	p__Actinobacteria	c__Actinobacteria	o__Actinomycetales	f__Microbacteriaceae	g__	s__
seq1239	32	23	25	0	0	7	0	0	0	7	0	0	k__Bacteria	p__Proteobacteria	c__Alphaproteobacteria	o__Caulobacterales	f__Caulobacteraceae	g__Phenylobacterium	s__
seq1240	6	63	13	0	7	0	0	0	0	2	3	0	k__Bacteria	p__Bacteroidetes	c__Cytophagia	o__Cytophagales	f__Cytophagaceae	g__	s__
seq1241	0	94	0	0	0	0	0	0	0	0	0	0	k__Bacteria	p__Proteobacteria	c__Gammaproteobacteria	o__Pseudomonadales	f__Pseudomonadaceae
seq1242	0	24	0	11	0	0	19	27	13	0	0	0	k__Bacteria	p__Chloroflexi	c__Anaerolineae	o__Anaerolineales	f__Anaerolinaceae	g__WCHB1-05	s__
seq1243	0	8	0	16	9	0	23	24	14	0	0	0	k__Bacteria
seq1244	0	17	0	0	0	0	0	27	0	50	0	0	k__Bacteria	p__Actinobacteria	c__Acidimicrobiia	o__Acidimicrobiales	f__C111	g__	s__
seq1245	0	0	0	22	17	55	0	0	0	0	0	0	k__Bacteria	p__Firmicutes	c__Bacilli	o__Bacillales	f__Planococcaceae
seq1246	0	0	0	0	0	0	3	25	0	44	18	4	k__Bacteria	p__Actinobacteria	c__Actinobacteria	o__Actinomycetales	f__Nocardiaceae	g__Nocardia	s__
seq1247	0	0	0	0	0	0	0	0	0	94	0	0	k__Bacteria	p__Actinobacteria	c__Actinobacteria	o__Actinomycetales
seq1248	64	0	0	0	0	29	0	0	0	0	0	0	k__Bacteria	p__Proteobacteria	c__Alphaproteobacteria	o__Sphingomonadales	f__Sphingomonadaceae	g__Kaistobacter	s__
seq1249	48	0	0	0	0	0	0	0	0	18	27	0	k__Bacteria	p__Actinobacteria	c__Actinobacteria	o__Actinomycetales	f__Nocardioidaceae
seq1250	53	0	40	0	0	0	0	0	0	0	0	0	k__Bacteria	p__Actinobacteria	c__Thermoleophilia	o__Gaiellales	f__Gaiellaceae	g__	s__
seq1251	49	39	3	2	0	0	0	0	0	0	0	0	k__Archaea	p__Euryarchaeota	c__Thermoplasmata	o__E2	f__	g__	s__
seq1252	15	17	0	0	10	41	0	0	0	0	3	7	k__Bacteria	p__Proteobacteria	c__Alphaproteobacteria	o__Rhodospirillales	f__Rhodospirillaceae
seq1253	22	0	71	0	0	0	0	0	0	0	0	0	k__Bacteria	p__Proteobacteria	c__Betaproteobacteria	o__Burkholderiales	f__Oxalobacteraceae	g__	s__
seq1254	0	17	0	28	0	0	9	13	26	0	0	0	k__Bacteria	p__Proteobacteria	c__Deltaproteobacteria	o__Syntrophobacterales	f__Syntrophaceae	g__Syntrophus	s__
seq1255	0	10	0	14	0	0	38	31	0	0	0	0	k__Bacteria	p__Actinobacteria	c__Actinobacteria	o__Actinomycetales	f__	g__	s__
seq1256	0	14	79	0	0	0	0	0	0	0	0	0	k__Bacteria	p__Gemmatimonadetes	c__Gemm-3	o__	f__	g__	s__
seq1257	0	0	0	0	0	0	0	0	0	93	0	0	k__Bacteria	p__Cyanobacteria	c__Chloroplast	o__Streptophyta	f__	g__	s__
seq1258	92	0	0	0	0	0	0	0	0	0	0	0	k__Bacteria	p__Actinobacteria	c__Thermoleophilia	o__Gaiellales	f__Gaiellaceae	g__	s__
seq1259	73	19	0	0	0	0	0	0	0	0	0	0	k__Bacteria	p__Actinobacteria	c__Rubrobacteria	o__Rubrobacterales	f__Rubrobacteraceae	g__Rubrobacter	s__
seq1260	45	40	0	7	0	0	0	0	0	0	0	0	k__Bacteria	p__Gemmatimonadetes	c__Gemmatimonadetes	o__	f__	g__	s__
seq1261	34	0	58	0	0	0	0	0	0	0	0	0	k__Bacteria	p__Gemmatimonadetes	c__Gemm-3	o__	f__	g__	s__
seq1262	64	0	28	0	0	0	0	0	0	0	0	0	k__Archaea	p__Crenarchaeota	c__Thaumarchaeota	o__Nitrososphaerales	f__Nitrososphaeraceae	g__Candidatus Nitrososphaera	s__gargensis
seq1263	21	6	34	0	0	0	0	0	0	25	0	6	k__Bacteria	p__Proteobacteria	c__Alphaproteobacteria	o__Rhodospirillales	f__Rhodospirillaceae	g__	s__
seq1264	0	32	60	0	0	0	0	0	0	0	0	0	k__Bacteria	p__Actinobacteria	c__Acidimicrobiia	o__Acidimicrobiales	f__	g__	s__
seq1265	0	18	0	11	0	0	15	23	16	0	9	0	k__Bacteria	p__Firmicutes	c__Clostridia	o__Clostridiales	f__[Mogibacteriaceae]	g__Anaerovorax	s__
seq1266	0	38	54	0	0	0	0	0	0	0	0	0	k__Bacteria	p__Proteobacteria	c__Alphaproteobacteria	o__Sphingomonadales	f__Sphingomonadaceae	g__Kaistobacter	s__
seq1267	0	31	0	24	0	0	0	37	0	0	0	0	k__Bacteria	p__Proteobacteria	c__Alphaproteobacteria	o__Sphingomonadales	f__Sphingomonadaceae	g__Novosphingobium	s__
seq1268	0	2	0	21	0	0	0	0	31	0	27	11	k__Bacteria	p__Proteobacteria	c__Alphaproteobacteria	o__Rhodospirillales	f__	g__	s__
seq1269	0	0	0	35	0	0	0	0	16	0	16	25	k__Bacteria	p__Proteobacteria	c__Alphaproteobacteria	o__Rhodospirillales	f__Rhodospirillaceae	g__	s__
seq1270	0	0	0	22	0	0	22	25	16	0	0	7	k__Bacteria	p__Proteobacteria	c__Gammaproteobacteria	o__Pseudomonadales	f__Pseudomonadaceae
seq1271	0	0	0	0	21	0	0	0	0	0	27	44	k__Bacteria	p__Firmicutes	c__Bacilli	o__Bacillales	f__Alicyclobacillaceae	g__Alicyclobacillus	s__
seq1272	0	0	0	0	0	0	48	0	44	0	0	0	k__Bacteria	p__Proteobacteria	c__Betaproteobacteria	o__Rhodocyclales	f__Rhodocyclaceae	g__Dechloromonas	s__
seq1273	0	0	0	0	0	0	0	0	0	0	9	83	k__Bacteria	p__Proteobacteria	c__Gammaproteobacteria	o__Enterobacteriales	f__Enterobacteriaceae
seq1274	0	0	0	0	0	0	0	0	0	0	0	92	k__Bacteria	p__Firmicutes	c__Bacilli	o__Bacillales	f__Paenibacillaceae	g__	s__
seq1275	40	0	9	0	0	15	0	12	0	15	0	0	k__Bacteria	p__Actinobacteria	c__Acidimicrobiia	o__Acidimicrobiales	f__C111	g__	s__
seq1276	56	0	25	0	0	10	0	0	0	0	0	0	k__Bacteria	p__Actinobacteria	c__Thermoleophilia	o__Gaiellales	f__Gaiellaceae	g__	s__
seq1277	10	39	16	9	10	0	0	0	0	7	0	0	k__Bacteria	p__Proteobacteria	c__Gammaproteobacteria	o__Xanthomonadales	f__Xanthomonadaceae	g__Lysobacter	s__
seq1278	18	43	30	0	0	0	0	0	0	0	0	0	k__Bacteria	p__Proteobacteria	c__Betaproteobacteria	o__Burkholderiales
seq1279	0	91	0	0	0	0	0	0	0	0	0	0	k__Bacteria	p__Proteobacteria	c__Alphaproteobacteria	o__Rhizobiales	f__Phyllobacteriaceae	g__	s__
seq1280	0	76	15	0	0	0	0	0	0	0	0	0	k__Bacteria	p__Actinobacteria	c__Actinobacteria	o__Actinomycetales	f__Sporichthyaceae	g__	s__
seq1281	0	41	50	0	0	0	0	0	0	0	0	0	k__Bacteria	p__Actinobacteria	c__Actinobacteria	o__Actinomycetales	f__Geodermatophilaceae
seq1282	0	0	0	0	0	42	0	0	0	0	49	0	k__Bacteria	p__Actinobacteria	c__Actinobacteria	o__Actinomycetales	f__Nocardioidaceae	g__	s__
seq1283	0	0	0	0	0	0	0	0	0	91	0	0	k__Bacteria	p__Actinobacteria	c__Actinobacteria	o__Actinomycetales	f__Pseudonocardiaceae	g__Pseudonocardia	s__
seq1284	90	0	0	0	0	0	0	0	0	0	0	0	k__Bacteria	p__Gemmatimonadetes	c__Gemmatimonadetes
seq1285	81	9	0	0	0	0	0	0	0	0	0	0	k__Bacteria	p__Verrucomicrobia	c__[Pedosphaerae]	o__[Pedosphaerales]	f__	g__	s__
seq1286	68	22	0	0	0	0	0	0	0	0	0	0	k__Bacteria	p__Proteobacteria	c__Alphaproteobacteria	o__Rhizobiales
seq1287	57	0	13	0	0	20	0	0	0	0	0	0	k__Bacteria	p__Proteobacteria	c__Deltaproteobacteria	o__Syntrophobacterales	f__Syntrophobacteraceae	g__	s__
seq1288	37	33	0	7	8	0	0	0	0	5	0	0	k__Bacteria	p__Actinobacteria	c__Acidimicrobiia	o__Acidimicrobiales	f__	g__	s__
seq1289	9	0	81	0	0	0	0	0	0	0	0	0	k__Bacteria	p__Actinobacteria	c__Thermoleophilia	o__Solirubrobacterales	f__	g__	s__
seq1290	16	0	74	0	0	0	0	0	0	0	0	0	k__Bacteria	p__Proteobacteria	c__Alphaproteobacteria	o__Rhizobiales	f__Hyphomicrobiaceae
seq1291	0	0	0	0	90	0	0	0	0	0	0	0	k__Bacteria	p__Actinobacteria	c__Actinobacteria	o__Actinomycetales
seq1292	0	0	0	0	0	0	0	0	50	40	0	0	k__Bacteria	p__Actinobacteria	c__Actinobacteria	o__Actinomycetales	f__Pseudonocardiaceae
seq1293	56	9	5	0	4	6	0	0	0	3	6	0	k__Bacteria	p__Acidobacteria	c__Solibacteres	o__Solibacterales	f__	g__	s__
seq1294	32	32	17	0	0	0	0	0	0	8	0	0	k__Bacteria	p__Gemmatimonadetes	c__Gemmatimonadetes	o__	f__	g__	s__
seq1295	0	0	0	0	4	0	0	0	0	33	17	35	k__Bacteria	p__Actinobacteria	c__Actinobacteria	o__Actinomycetales	f__Glycomycetaceae	g__Glycomyces	s__
seq1296	0	0	0	0	0	8	0	0	0	0	11	70	k__Bacteria	p__Firmicutes	c__Bacilli	o__Bacillales	f__Paenibacillaceae	g__Paenibacillus	s__
seq1297	0	0	0	0	0	89	0	0	0	0	0	0	k__Bacteria	p__Firmicutes	c__Bacilli	o__Bacillales	f__Bacillaceae	g__Bacillus	s__
seq1298	0	0	0	0	0	0	0	0	0	78	11	0	k__Bacteria	p__Actinobacteria	c__Actinobacteria	o__Actinomycetales	f__Nocardiaceae	g__Rhodococcus	s__
seq1299	71	12	0	0	0	0	0	0	0	5	0	0	k__Bacteria	p__Actinobacteria	c__Thermoleophilia	o__Gaiellales	f__Gaiellaceae	g__	s__
seq1300	46	34	0	0	0	0	0	0	0	0	8	0	k__Bacteria	p__Gemmatimonadetes	c__Gemm-3	o__	f__	g__	s__
seq1301	32	0	56	0	0	0	0	0	0	0	0	0	k__Bacteria	p__Chloroflexi	c__TK10
seq1302	8	44	30	0	2	0	0	0	0	0	4	0	k__Bacteria	p__[Thermi]	c__Deinococci	o__Deinococcales	f__Deinococcaceae	g__Deinococcus	s__
seq1303	17	0	0	0	0	71	0	0	0	0	0	0	k__Bacteria	p__Firmicutes	c__Bacilli	o__Bacillales	f__Alicyclobacillaceae	g__Alicyclobacillus	s__
seq1304	27	38	0	0	0	0	0	0	0	0	23	0	k__Bacteria	p__Actinobacteria	c__Actinobacteria	o__Actinomycetales	f__Geodermatophilaceae
seq1305	0	42	22	0	24	0	0	0	0	0	0	0	k__Bacteria	p__Actinobacteria	c__Actinobacteria	o__Actinomycetales	f__Micromonosporaceae
seq1306	0	0	0	35	0	0	13	0	8	0	6	26	k__Bacteria	p__Proteobacteria	c__Alphaproteobacteria	o__Kiloniellales	f__Kiloniellaceae	g__	s__
seq1307	0	0	0	0	88	0	0	0	0	0	0	0	k__Bacteria	p__Actinobacteria	c__Actinobacteria	o__Actinomycetales	f__Cellulomonadaceae	g__Actinotalea	s__
seq1308	0	0	0	0	0	0	82	6	0	0	0	0	k__Bacteria	p__Proteobacteria	c__Alphaproteobacteria
seq1309	0	0	0	0	0	0	22	32	0	34	0	0	k__Bacteria	p__Actinobacteria	c__Rubrobacteria	o__Rubrobacterales	f__Rubrobacteraceae	g__Rubrobacter	s__
seq1310	0	0	0	0	0	0	0	15	0	73	0	0	k__Bacteria	p__Actinobacteria	c__Actinobacteria	o__Actinomycetales	f__Mycobacteriaceae	g__Mycobacterium	s__
seq1311	24	12	30	11	4	0	0	0	0	6	0	0	k__Bacteria	p__Proteobacteria	c__Alphaproteobacteria	o__Rhodospirillales	f__Rhodospirillaceae	g__	s__
seq1312	47	40	0	0	0	0	0	0	0	0	0	0	k__Bacteria	p__Proteobacteria	c__Alphaproteobacteria	o__Sphingomonadales	f__Sphingomonadaceae	g__Sphingomonas	s__
seq1313	16	0	71	0	0	0	0	0	0	0	0	0	k__Bacteria	p__Actinobacteria	c__MB-A2-108	o__0319-7L14	f__	g__	s__
seq1314	0	0	87	0	0	0	0	0	0	0	0	0	k__Archaea	p__Euryarchaeota	c__Thermoplasmata	o__E2
seq1315	0	0	87	0	0	0	0	0	0	0	0	0	k__Bacteria	p__Actinobacteria	c__Thermoleophilia	o__Solirubrobacterales	f__	g__	s__
seq1316	0	0	87	0	0	0	0	0	0	0	0	0	k__Bacteria	p__Actinobacteria	c__MB-A2-108	o__0319-7L14	f__	g__	s__
seq1317	0	0	0	34	0	0	7	0	0	0	0	46	k__Bacteria	p__Firmicutes	c__Bacilli	o__Bacillales	f__Paenibacillaceae	g__Saccharibacillus	s__kuerlensis
seq1318	0	0	0	0	0	0	22	38	27	0	0	0	k__Bacteria	p__Proteobacteria	c__Betaproteobacteria	o__Rhodocyclales	f__Rhodocyclaceae	g__Dechloromonas	s__
seq1319	68	0	18	0	0	0	0	0	0	0	0	0	k__Bacteria	p__Gemmatimonadetes	c__Gemm-3	o__	f__	g__	s__
seq1320	0	14	0	0	0	0	0	8	0	28	17	19	k__Bacteria	p__Proteobacteria	c__Gammaproteobacteria	o__Xanthomonadales	f__Sinobacteraceae	g__Steroidobacter	s__
seq1321	0	0	0	0	0	55	0	0	0	0	31	0	k__Bacteria	p__Firmicutes	c__Bacilli	o__Bacillales	f__Paenibacillaceae	g__	s__
seq1322	0	0	0	0	0	86	0	0	0	0	0	0	k__Bacteria	p__Firmicutes	c__Bacilli	o__Bacillales	f__Bacillaceae	g__Bacillus	s__
seq1323	0	0	0	0	0	0	53	33	0	0	0	0	k__Bacteria	p__Proteobacteria	c__Alphaproteobacteria	o__Rhizobiales	f__Methylocystaceae	g__Methylosinus	s__
seq1324	0	0	0	0	0	0	48	38	0	0	0	0	k__Bacteria	p__Firmicutes	c__Clostridia	o__Clostridiales	f__Clostridiaceae	g__Clostridium	s__ljungdahlii
seq1325	0	0	0	0	0	0	0	9	0	77	0	0	k__Bacteria	p__Proteobacteria	c__Alphaproteobacteria	o__Rhizobiales
seq1326	0	0	0	0	0	0	0	0	40	0	46	0	k__Bacteria	p__Proteobacteria	c__Gammaproteobacteria	o__Alteromonadales	f__OM60
seq1327	54	0	14	8	0	9	0	0	0	0	0	0	k__Bacteria	p__Actinobacteria	c__Acidimicrobiia	o__Acidimicrobiales	f__	g__	s__
seq1328	49	0	0	0	0	36	0	0	0	0	0	0	k__Bacteria	p__Actinobacteria	c__Thermoleophilia	o__Solirubrobacterales	f__Solirubrobacteraceae	g__	s__
seq1329	43	0	42	0	0	0	0	0	0	0	0	0	k__Bacteria	p__Actinobacteria	c__Thermoleophilia	o__Solirubrobacterales	f__	g__	s__
seq1330	27	35	8	0	0	4	0	0	0	6	3	2	k__Bacteria	p__Proteobacteria	c__Deltaproteobacteria	o__Myxococcales	f__	g__	s__
seq1331	23	44	18	0	0	0	0	0	0	0	0	0	k__Bacteria	p__Gemmatimonadetes	c__Gemm-3	o__	f__	g__	s__
seq1332	9	0	76	0	0	0	0	0	0	0	0	0	k__Bacteria	p__Actinobacteria	c__MB-A2-108	o__0319-7L14	f__	g__	s__
seq1333	0	77	8	0	0	0	0	0	0	0	0	0	k__Bacteria	p__Proteobacteria	c__Betaproteobacteria	o__Burkholderiales	f__Oxalobacteraceae	g__	s__
seq1334	0	32	0	17	26	10	0	0	0	0	0	0	k__Bacteria	p__Actinobacteria	c__Actinobacteria	o__Actinomycetales	f__Micrococcaceae
seq1335	0	0	0	22	4	0	24	23	12	0	0	0	k__Bacteria	p__Acidobacteria	c__Acidobacteria-6	o__iii1-15	f__	g__	s__
seq1336	0	0	0	0	77	8	0	0	0	0	0	0	k__Bacteria	p__Proteobacteria	c__Deltaproteobacteria	o__Myxococcales	f__Polyangiaceae	g__Sorangium
seq1337	0	0	0	0	0	0	42	20	0	23	0	0	k__Bacteria	p__Proteobacteria	c__Deltaproteobacteria	o__Syntrophobacterales	f__Syntrophobacteraceae	g__	s__
seq1338	0	0	0	0	0	0	0	35	11	29	10	0	k__Bacteria	p__Proteobacteria	c__Gammaproteobacteria	o__Vibrionales	f__Vibrionaceae	g__Vibrio	s__shilonii
seq1339	59	10	5	0	0	10	0	0	0	0	0	0	k__Bacteria	p__Proteobacteria	c__Betaproteobacteria	o__	f__	g__	s__
seq1340	39	2	43	0	0	0	0	0	0	0	0	0	k__Bacteria	p__Chloroflexi
seq1341	26	27	27	0	4	0	0	0	0	0	0	0	k__Bacteria	p__Cyanobacteria	c__ML635J-21	o__	f__	g__	s__
seq1342	20	28	12	0	9	15	0	0	0	0	0	0	k__Bacteria	p__Proteobacteria	c__Alphaproteobacteria	o__Rhodospirillales	f__Acetobacteraceae	g__	s__
seq1343	42	0	0	0	6	36	0	0	0	0	0	0	k__Bacteria	p__Proteobacteria	c__Alphaproteobacteria	o__Rhodospirillales	f__Rhodospirillaceae
seq1344	21	16	37	0	0	10	0	0	0	0	0	0	k__Bacteria	p__Proteobacteria	c__Alphaproteobacteria	o__Rhizobiales	f__Hyphomicrobiaceae	g__	s__
seq1345	41	0	43	0	0	0	0	0	0	0	0	0	k__Bacteria	p__Actinobacteria	c__Thermoleophilia	o__Solirubrobacterales	f__	g__	s__
seq1346	24	0	60	0	0	0	0	0	0	0	0	0	k__Bacteria	p__Actinobacteria	c__Acidimicrobiia	o__Acidimicrobiales	f__	g__	s__
seq1347	17	29	21	0	11	6	0	0	0	0	0	0	k__Bacteria	p__Actinobacteria	c__Acidimicrobiia	o__Acidimicrobiales	f__	g__	s__
seq1348	0	24	0	0	0	0	0	0	0	35	14	11	k__Bacteria	p__Proteobacteria	c__Alphaproteobacteria	o__Caulobacterales	f__Caulobacteraceae	g__Caulobacter	s__
seq1349	0	3	4	6	34	37	0	0	0	0	0	0	k__Bacteria	p__Bacteroidetes	c__Cytophagia	o__Cytophagales	f__Cytophagaceae	g__Larkinella	s__
seq1350	0	36	0	0	25	0	0	0	0	0	0	23	k__Bacteria	p__Actinobacteria	c__Actinobacteria	o__Actinomycetales	f__Nocardioidaceae	g__	s__
seq1351	0	7	0	27	39	11	0	0	0	0	0	0	k__Bacteria	p__Bacteroidetes	c__Cytophagia	o__Cytophagales	f__Cytophagaceae	g__	s__
seq1352	0	5	0	0	0	0	0	0	0	9	64	6	k__Bacteria	p__Actinobacteria	c__Actinobacteria	o__Actinomycetales	f__Nocardioidaceae	g__Nocardioides	s__
seq1353	0	0	84	0	0	0	0	0	0	0	0	0	k__Bacteria	p__Actinobacteria	c__MB-A2-108	o__0319-7L14	f__	g__	s__
seq1354	0	0	0	11	0	0	30	24	19	0	0	0	k__Bacteria	p__Firmicutes	c__Clostridia	o__Clostridiales	f__Clostridiaceae
seq1355	0	0	0	23	0	61	0	0	0	0	0	0	k__Bacteria	p__Proteobacteria	c__Betaproteobacteria	o__Burkholderiales	f__Oxalobacteraceae
seq1356	0	0	0	0	0	0	36	48	0	0	0	0	k__Bacteria	p__Actinobacteria	c__Thermoleophilia	o__Gaiellales	f__Gaiellaceae	g__	s__
seq1357	0	0	0	0	0	0	0	0	0	39	0	45	k__Bacteria	p__Firmicutes	c__Bacilli	o__Bacillales	f__Bacillaceae	g__Bacillus	s__endophyticus
seq1358	73	0	5	0	0	5	0	0	0	0	0	0	k__Bacteria	p__Proteobacteria	c__Betaproteobacteria	o__Nitrosomonadales	f__Nitrosomonadaceae	g__	s__
seq1359	25	33	13	7	0	0	0	0	0	5	0	0	k__Bacteria	p__Actinobacteria	c__Acidimicrobiia	o__Acidimicrobiales	f__	g__	s__
seq1360	27	23	17	8	0	0	0	0	0	4	4	0	k__Bacteria	p__Chloroflexi	c__Chloroflexi	o__[Roseiflexales]
seq1361	31	42	10	0	0	0	0	0	0	0	0	0	k__Bacteria	p__Proteobacteria	c__Alphaproteobacteria	o__Rhizobiales	f__Bradyrhizobiaceae	g__Balneimonas	s__
seq1362	21	24	0	20	13	5	0	0	0	0	0	0	k__Bacteria	p__Proteobacteria	c__Alphaproteobacteria	o__Sphingomonadales	f__Sphingomonadaceae	g__Kaistobacter	s__
seq1363	19	0	13	0	0	0	19	0	0	0	32	0	k__Bacteria	p__Proteobacteria	c__Gammaproteobacteria	o__Xanthomonadales	f__Sinobacteraceae	g__Steroidobacter	s__
seq1364	47	19	17	0	0	0	0	0	0	0	0	0	k__Bacteria	p__Nitrospirae	c__Nitrospira	o__Nitrospirales	f__Nitrospiraceae	g__Nitrospira	s__
seq1365	16	9	16	3	39	0	0	0	0	0	0	0	k__Bacteria	p__Bacteroidetes	c__Cytophagia	o__Cytophagales	f__Cytophagaceae	g__Adhaeribacter	s__
seq1366	15	39	29	0	0	0	0	0	0	0	0	0	k__Bacteria	p__Proteobacteria	c__Betaproteobacteria	o__Burkholderiales
seq1367	0	52	0	0	31	0	0	0	0	0	0	0	k__Bacteria	p__Bacteroidetes	c__[Saprospirae]	o__[Saprospirales]	f__Chitinophagaceae	g__Flavisolibacter	s__
seq1368	0	0	0	8	0	0	21	0	30	0	18	6	k__Bacteria	p__Actinobacteria	c__Acidimicrobiia	o__Acidimicrobiales	f__koll13
seq1369	0	0	0	14	0	0	22	27	20	0	0	0	k__Bacteria	p__Firmicutes	c__Clostridia	o__Clostridiales	f__Lachnospiraceae
seq1370	0	0	0	0	83	0	0	0	0	0	0	0	k__Bacteria	p__Bacteroidetes	c__Cytophagia	o__Cytophagales	f__Cytophagaceae	g__Adhaeribacter	s__
seq1371	0	0	0	0	9	11	0	21	9	0	21	12	k__Bacteria	p__Proteobacteria	c__Alphaproteobacteria	o__Rhodospirillales	f__Rhodospirillaceae
seq1372	0	0	0	0	23	0	0	0	0	13	29	18	k__Bacteria	p__Proteobacteria	c__Alphaproteobacteria	o__Rhodobacterales	f__Rhodobacteraceae	g__Paracoccus	s__
seq1373	0	0	0	0	0	0	14	12	21	25	11	0	k__Bacteria	p__Actinobacteria	c__Actinobacteria	o__Actinomycetales	f__Pseudonocardiaceae	g__Saccharopolyspora	s__
seq1374	82	0	0	0	0	0	0	0	0	0	0	0	k__Bacteria	p__Actinobacteria	c__Thermoleophilia	o__Gaiellales	f__Gaiellaceae	g__	s__
seq1375	77	0	0	0	5	0	0	0	0	0	0	0	k__Bacteria	p__Gemmatimonadetes	c__Gemm-3	o__	f__	g__	s__
seq1376	46	27	9	0	0	0	0	0	0	0	0	0	k__Bacteria	p__Verrucomicrobia	c__[Pedosphaerae]	o__[Pedosphaerales]	f__Ellin517	g__	s__
seq1377	66	16	0	0	0	0	0	0	0	0	0	0	k__Bacteria	p__Proteobacteria	c__Alphaproteobacteria	o__Rhizobiales	f__Beijerinckiaceae	g__	s__
seq1378	26	26	3	7	16	0	2	0	2	0	0	0	k__Bacteria	p__Actinobacteria	c__Acidimicrobiia	o__Acidimicrobiales	f__	g__	s__
seq1379	34	22	8	8	0	0	0	0	0	10	0	0	k__Bacteria	p__Gemmatimonadetes	c__Gemmatimonadetes	o__Gemmatimonadales	f__	g__	s__
seq1380	29	0	53	0	0	0	0	0	0	0	0	0	k__Bacteria	p__Actinobacteria	c__Thermoleophilia	o__Solirubrobacterales	f__	g__	s__
seq1381	0	43	39	0	0	0	0	0	0	0	0	0	k__Bacteria	p__Actinobacteria	c__Actinobacteria	o__Actinomycetales	f__Micromonosporaceae	g__	s__
seq1382	0	18	0	18	0	0	26	0	20	0	0	0	k__Bacteria	p__Bacteroidetes	c__Bacteroidia	o__Bacteroidales	f__	g__	s__
seq1383	0	8	0	0	0	0	0	0	0	74	0	0	k__Bacteria	p__Actinobacteria	c__Actinobacteria	o__Actinomycetales	f__Streptosporangiaceae
seq1384	0	0	82	0	0	0	0	0	0	0	0	0	k__Bacteria	p__Actinobacteria	c__Actinobacteria	o__Actinomycetales	f__Pseudonocardiaceae	g__Pseudonocardia	s__
seq1385	0	0	0	0	0	0	12	0	43	0	27	0	k__Bacteria
seq1386	81	0	0	0	0	0	0	0	0	0	0	0	k__Bacteria	p__Firmicutes	c__Bacilli	o__Bacillales	f__Staphylococcaceae	g__Staphylococcus	s__epidermidis
seq1387	50	0	31	0	0	0	0	0	0	0	0	0	k__Bacteria	p__Chloroflexi	c__Chloroflexi
[truncated: 8,431 more rows]
