# Supplementary material for: Microbiome of Citrullus colocynthis (L.) Schrad. Reveals a Potential Association with Non-Photosynthetic Cyanobacteria
Source: Microorganisms. 2022 Oct 21;10(10):2083. doi: 10.3390/microorganisms10102083 (PMC9607294; doi:10.3390/microorganisms10102083)
Supplement: Supplementary file 1 [file microorganisms-10-02083-s001.zip › Supplementary_TableS2_Elemental_composition_of_soil_samples.xlsx]

## Sheet: Sheet1
Elemental component	Root Zone soil			Bulk Soil			Average
	Plant 1	Plant 2	Plant 3	Plant 1	Plant 2	Plant 3
Calcium (Ca)	55.5	57	56.6	59.5	55.7	53.7	56.3333
Silicon (Si)	26.2	24.3	25	21.9	26.1	27.5	25.1667
Iron (Fe)	7.12	6.99	6.79	7.39	7.38	7.19	7.14333
Aluminium (Al)	3.49	3.91	3.82	3.53	3.32	3.62	3.615
Magnesium (Mg)	2.43	2.96	2.72	2.8	2.65	2.52	2.68
Potassium (K)	2.29	2.05	2.21	1.87	2.03	2.43	2.14667
Titanium (Ti)	0.883	0.782	0.811	0.947	0.787	0.607	0.802833
Sodium (Na)	0.484	0.499	0.48	0.415	0.377	0.435	0.448333
Chromium (Cr)	0.389	0.417	0.393	0.497	0.43	0.412	0.423
Strontium (Sr)	0.346	0.328	0.35	0.34	0.309	0.319	0.332
Barium (Ba)	0.295	0.202	0.236	0.255	0.274	0.283	0.2575
Manganese (Mn)	0.167	0.185	0.17	0.205	0.186	0.171	0.180667
Phosphate (P)	0.137	0.131	0.0978	0.145	0.0854	0.345	0.156867
Sulfur (S)	0.101	0.102	0.103	0.0843	0.0852	0.0833	0.0931333
Nickel (Ni)	0.0846	0.0722	0.07	0.0854	0.0999	0.0908	0.0838167
Iodine (I)	0	0	0.126	0	0.123	0.137	0.0643333
Chlorine (Cl)	0.0792	0.047	0.0577	0.0278	0	0.0274	0.03985
Rubidium (Rb)	0.0234	0.0224	0.0205	0.0214	0.0211	0.025	0.0223
Zinc (Zn)	0.0151	0	0.0125	0.0152	0.0139	0	0.00945
Vanadium (V)	0	0	0	0	0.0373	0	0.00621667
Copper (Cu)	0	0	0	0.0131	0	0.0135	0.00443333
Cobalt (Co)	0	0	0	0	0.0091	0	0.00151667
